# Supplementary material for: iRegulon: From a Gene List to a Gene Regulatory Network Using Large Motif and Track Collections
Source: PLoS Comput Biol. 2014 Jul 24;10(7):e1003731. doi: 10.1371/journal.pcbi.1003731 (PMC4109854; doi:10.1371/journal.pcbi.1003731)
Supplement: Table S7 — iRegulon results on up-regulated and down-regulated genes using motif (10K collection) and track discovery. Orange rows indicate enriched motifs while green rows indicate enriched tracks. (XLSX) [file pcbi.1003731.s015.xlsx]

## Sheet: iRegulon results (combined)
#GeneSignatureID	Rank	FeatureID	FeatureDescription	FeatureAnnotations	FeatureDatabase	AUC	Escore	CandidateTargetIDs	TopTargetIDs	TopTargetRanks
RNAseq_upregulated_genes	1	transfac_pro-M01656	V$P63_01	TP63,TP53,TP73	hg19-tss-centered-10kb-10species	0.0385057	5.64183	CDKN1A;ZMAT3;MDM2;ABCA12;RPS27L;RAP2B;DDIT4;SLC12A4;GPR87;CPEB4;CSNK1G1;CYP4F8;GADD45A;APOD;BBC3;GRHL3;LIMK2;SPATA18;HSPA4L;SEPT9;NUAK1;CALD1;NEAT1;NTN4;USP2;PHLDA3;RRM2B;GPR173;ARNTL;SRGAP3;TRIM22;PDE4C;RHOQ;CCNG1;CLDN1;SYBU;TGFBI;RAB5B;ALDH4A1;SYTL1;C5orf4;ZNF423;ALDH3A1;MFGE8;MKNK2;CATSPERG;FHL2;C16orf5;PAQR7;MTRNR2L6;MAP3K1;FAS;CLCA2;SPRY1;FOS;SLC7A8;TMEM45B;C13orf31;MXD4;COL17A1;DKK1;COL7A1;…	CDKN1A;ZMAT3;MDM2;ABCA12;RPS27L;RAP2B;DDIT4;SLC12A4;GPR87;CPEB4;CSNK1G1;CYP4F8;GADD45A;APOD;BBC3;GRHL3;LIMK2;SPATA18;HSPA4L;SEPT9;NUAK1;CALD1;NEAT1;NTN4;USP2;PHLDA3;RRM2B;GPR173;ARNTL;SRGAP3;TRIM22;PDE4C;RHOQ;CCNG1;CLDN1;SYBU;TGFBI;RAB5B;ALDH4A1;SYTL1;C5orf4;ZNF423;ALDH3A1;MFGE8;MKNK2;CATSPERG;FHL2;C16orf5;PAQR7;MTRNR2L6;MAP3K1;FAS;CLCA2;SPRY1;FOS;SLC7A8;TMEM45B;C13orf31;MXD4;COL17A1;DKK1;COL7A1;…	1;2;4;11;16;18;20;31;37;42;44;45;57;72;82;94;95;96;111;135;142;164;168;198;218;221;251;305;308;339;375;376;386;389;390;400;401;408;421;431;510;526;529;530;549;560;573;597;620;628;641;654;656;669;681;753;782;803;828;844;846;848;849;857;858;879;893;908;912;921;944;951;966;971;974;1000;1027;1065;1099;1108;1151;1181;1195;1199;1200;1221;1233;1250;1260;1267;1286;1346;1359;1392;1416;1425;1443;1464;1517;…
RNAseq_upregulated_genes	2	taipale-RACATGYCNNGRCATGTY-Tp53-DBD	RACATGYCNNGRCATGTY-Tp53-DBD	TP63,TP53	hg19-tss-centered-10kb-10species	0.0377536	5.45054	CDKN1A;ZMAT3;ARNTL;DDIT4;CALD1;CSNK1G1;CCNG1;FOSL1;RRM2B;CYP4F8;CPEB4;GADD45A;PHLDA3;AEN;USP2;MDM2;ALDH3A1;TRIM22;NAV2;TGFB2;NTN4;NEAT1;LMO7;RAP2B;SLC12A4;BBC3;GPR87;NYNRIN;FOS;SYT8;RPS27L;LHFPL2;SULF2;C13orf31;KIAA1210;APOD;SERPINB5;TGFBI;HSPA4L;NHLH2;FAS;TMEM45B;BAX;RHOC;GPR173;SLC7A8;FGF13;MXD4;SPATA18;CAPN2;FAM189A2;PAQR7;ARHGDIB;TNS4;ARHGAP42;MAP3K1;SYBU;NEDD9;EFCAB10;DUSP4;ALDH4A1;GHR;CAPN1…	CDKN1A;ZMAT3;ARNTL;DDIT4;CALD1;CSNK1G1;CCNG1;FOSL1;RRM2B;CYP4F8;CPEB4;GADD45A;PHLDA3;AEN;USP2;MDM2;ALDH3A1;TRIM22;NAV2;TGFB2;NTN4;NEAT1;LMO7;RAP2B;SLC12A4;BBC3;GPR87;NYNRIN;FOS;SYT8;RPS27L;LHFPL2;SULF2;C13orf31;KIAA1210;APOD;SERPINB5;TGFBI;HSPA4L;NHLH2;FAS;TMEM45B;BAX;RHOC;GPR173;SLC7A8;FGF13;MXD4;SPATA18;CAPN2;FAM189A2;PAQR7;ARHGDIB;TNS4;ARHGAP42;MAP3K1;SYBU;NEDD9;EFCAB10;DUSP4;ALDH4A1;GHR;CAPN1…	1;2;10;15;24;33;40;44;56;63;78;97;99;100;127;129;141;145;155;161;170;171;181;208;239;269;270;312;324;325;345;364;394;414;445;450;455;466;468;469;470;475;485;509;512;548;561;564;570;579;598;611;618;633;648;655;664;684;692;741;762;791;815;825;835;871;891;897;907;910;913;929;939;941;947;948;956;976;983;988;1008;1027;1042;1053;1079;1082;1092;1103;1133;1184;1186;1203;1209;1224;1239;1263;1278;1279;1334…
RNAseq_upregulated_genes	3	transfac_public-M00038	F$GCN4_01	BATF,TGIF2LX,SPI1,SRF,FOS,BACH2,BACH1,JUNB,JUN,JUND,TGIF2LY,JDP2,ARNT,FOSL1,TGIF2,FOSL2,FOSB,TGIF1	hg19-tss-centered-10kb-10species	0.0377107	5.43963	CDKN1A;RGS20;LTBP2;LRRC37A3;SHC4;CAPN2;AQP3;SPNS2;PROM2;GRIK5;FGF13;KRT16;KIAA0513;ZNF219;NFATC2;STX1B;NEDD9;PTAFR;SMAD3;FAM49A;SYT8;AHNAK2;SGK223;KIAA1539;CPEB4;MDM2;ATP10D;CLCA2;ATP8B2;CYP24A1;SEPT9;ANKRD22;RNF144B;PCNXL2;KANK3;NTSR1;NAV2;DUSP4;FHL2;RND3;PLK3;KSR1;PMEPA1;RNF39;RAB5B;EFCAB10;RNF19A;HSPB8;EDN2;C13orf18;KDM6B;SSTR5;SYTL2;YPEL3;COL7A1;IKBIP;UBE2H;ODZ4;GPRC5A;LAMB3;B4GALT1;BMP1;MBNL…	CDKN1A;RGS20;LTBP2;LRRC37A3;SHC4;CAPN2;AQP3;SPNS2;PROM2;GRIK5;FGF13;KRT16;KIAA0513;ZNF219;NFATC2;STX1B;NEDD9;PTAFR;SMAD3;FAM49A;SYT8;AHNAK2;SGK223;KIAA1539;CPEB4;MDM2;ATP10D;CLCA2;ATP8B2;CYP24A1;SEPT9;ANKRD22;RNF144B;PCNXL2;KANK3;NTSR1;NAV2;DUSP4;FHL2;RND3;PLK3;KSR1;PMEPA1;RNF39;RAB5B;EFCAB10;RNF19A;HSPB8;EDN2;C13orf18;KDM6B;SSTR5;SYTL2;YPEL3;COL7A1;IKBIP;UBE2H;ODZ4;GPRC5A;LAMB3;B4GALT1;BMP1;MBNL…	4;5;15;33;44;60;70;73;78;96;120;122;151;154;161;167;168;182;186;197;206;207;216;223;226;256;259;265;272;274;275;293;294;338;350;355;362;392;398;461;467;475;507;522;527;558;571;584;618;620;626;639;640;644;652;654;676;702;724;771;790;804;816;874;888;899;902;908;914;926;989;993;995;1022;1060;1090;1109;1134;1139;1156;1178;1181;1192;1194;1277;1294;1303;1324;1346;1347;1355;1359;1369;1370;1374;1425;1439…
RNAseq_upregulated_genes	4	transfac_pro-M02106	V$NFYA_Q5	NFYC,NFYB,NFYA,POLE4,POLE3,YBX1	hg19-tss-centered-10kb-10species	0.0367497	5.19517	ARID4A;ARNTL;MXD4;HES1;TXNIP;ADCK3;PNRC1;HIST1H2AI;WBP1;HIST2H2BE;ALDH4A1;MKNK2;SLC25A42;SESN3;PIK3R3;CCNG2;KDM6B;RAP2B;SESN2;CCNG1;SOX9;MXD1;LPXN;C17orf91;CAT;WDR81;HLA-F;TSPYL2;C20orf194;ARRDC4;SERTAD1;KDM4A;DUSP6;ABAT;MSX2;C1orf183;PPP2R5B;PIK3IP1;RHOQ;CDKN1A	ARID4A;ARNTL;MXD4;HES1;TXNIP;ADCK3;PNRC1;HIST1H2AI;WBP1;HIST2H2BE;ALDH4A1;MKNK2;SLC25A42;SESN3;PIK3R3;CCNG2;KDM6B;RAP2B;SESN2;CCNG1;SOX9;MXD1;LPXN;C17orf91;CAT;WDR81;HLA-F;TSPYL2;C20orf194;ARRDC4;SERTAD1;KDM4A;DUSP6;ABAT;MSX2;C1orf183;PPP2R5B;PIK3IP1;RHOQ;CDKN1A;SLC43A2;C5orf41;MAF;DUSP10;SHC4;KDM4B;KLF9;FDXR;EPS8L1;RAB40B;PDK4;MGC23284;BCL2L1;RPS6KA2;ARL15;LMCD1;ASB9;RFX5;FGD3;SARDH;HIST1H3A;SST…	3;11;13;35;57;62;63;74;82;85;95;100;104;110;112;148;158;181;189;190;213;230;231;243;259;265;275;276;287;288;294;306;311;317;336;362;381;397;410;427;469;473;519;551;574;611;620;670;686;691;699;708;710;720;738;783;847;911;965;990;1006;1029;1061;1079;1119;1120;1128;1146;1184;1192;1221;1222;1223;1235;1245;1248;1253;1278;1290;1362;1364;1377;1425;1439;1455;1482;1526;1531;1532;1540;1559;1563;1575;1579;1…
RNAseq_upregulated_genes	5	lcbTfbs_mcf7_p53_nutlin	TP53/MCF7/Nutlin	TP53	hg19-tss-centered-10kb-chip-encode-taipale-inhouse	0.070228	5.18418	RPS27L;DDB2;CDKN1A;AEN;PHLDA3;PLK3;ZMAT3;MDM2;BBC3;TNFRSF10B;LIF;RRM2B;NHLH2;TRIAP1;RAP2B;SPATA18;GDF15;GADD45A;EDN2;NEAT1;BAX;SEPT9;DCP1B;ALDH3A1;STEAP3;FAS;ACTA2;TNFRSF10C;TP53INP1;CCNG1;LIMK2;XPC;SLC12A4;SYT8;EML2;AHNAK2;LOC284440;SULF2;EPS8L2;ABCA12;SERTAD1;DRAM1;C12orf5;MUC2;ZNF337;C9orf169;MAP3K1	RPS27L;DDB2;CDKN1A;AEN;PHLDA3;PLK3;ZMAT3;MDM2;BBC3;TNFRSF10B;LIF;RRM2B;NHLH2;TRIAP1;RAP2B;SPATA18;GDF15;GADD45A;EDN2;NEAT1;BAX;SEPT9;DCP1B;ALDH3A1;STEAP3;FAS;ACTA2;TNFRSF10C;TP53INP1;CCNG1;LIMK2;XPC;SLC12A4;SYT8;EML2;AHNAK2;LOC284440;SULF2;EPS8L2;ABCA12;SERTAD1;DRAM1;C12orf5;MUC2;ZNF337;C9orf169;MAP3K1;C18orf56;FOSL1;BLOC1S2;ANXA3;C10orf116;FAM198B;KRT19;TRIM22;PSD4;TMC4;POLH;GPR87;SSPO;AGAP11;SY…	1;2;3;4;5;7;9;10;11;13;15;17;18;20;24;26;28;30;32;34;35;36;38;44;47;49;50;51;54;57;64;70;72;83;87;89;95;96;98;109;118;129;132;139;140;143;146;170;197;210;211;222;244;246;271;275;282;294;320;325;347;375;377;408;415;423;453;461;500;506;512;515;562;564;581;582;583;616;705;738;739;751;790;799;802;882;892;898;937;983;1019;1091;1107;1140;1143;1163;1164;1179;1212;1255;1317;1372;1385;1430;1439;1445;1479;…
RNAseq_upregulated_genes	6	transfac_pro-M01651	V$P53_03	TP63,TP53,TP73	hg19-tss-centered-10kb-10species	0.0360293	5.01195	CDKN1A;ZMAT3;MDM2;DDIT4;ABCA12;CPEB4;RAP2B;CSNK1G1;SLC12A4;RPS27L;CCNG1;NEAT1;ARNTL;CYP4F8;USP2;CALD1;GPR87;FOSL1;PDE4C;LMO7;RRM2B;GPR173;GADD45A;TGFB2;NTN4;TMEM45B;BBC3;TRIM22;FAS;PAQR7;LIMK2;LHFPL2;SLC26A2;FOS;SYT8;PHLDA3;SYBU;TGFBI;RHOQ;FHL2;MKNK2;CLCA2;C13orf31;RHOC;CAPN2;RAB40B;MXD4;ALDH4A1;NYNRIN;ZNF323;CUEDC1;COL17A1;SPRY1;RIN2;ZFYVE1;SRGAP3;SYTL1;FGF13;ALDH3A1;IL1RN;TRIM38;TMEM229B;GRHL3;…	CDKN1A;ZMAT3;MDM2;DDIT4;ABCA12;CPEB4;RAP2B;CSNK1G1;SLC12A4;RPS27L;CCNG1;NEAT1;ARNTL;CYP4F8;USP2;CALD1;GPR87;FOSL1;PDE4C;LMO7;RRM2B;GPR173;GADD45A;TGFB2;NTN4;TMEM45B;BBC3;TRIM22;FAS;PAQR7;LIMK2;LHFPL2;SLC26A2;FOS;SYT8;PHLDA3;SYBU;TGFBI;RHOQ;FHL2;MKNK2;CLCA2;C13orf31;RHOC;CAPN2;RAB40B;MXD4;ALDH4A1;NYNRIN;ZNF323;CUEDC1;COL17A1;SPRY1;RIN2;ZFYVE1;SRGAP3;SYTL1;FGF13;ALDH3A1;IL1RN;TRIM38;TMEM229B;GRHL3;…	1;2;6;7;14;18;19;23;26;32;35;55;63;79;111;123;149;155;156;174;216;235;245;251;269;271;286;312;317;368;381;399;407;423;425;434;461;500;510;519;530;550;554;566;568;570;573;613;622;624;632;654;695;728;735;748;752;766;769;782;786;836;853;894;900;918;965;1031;1037;1043;1074;1099;1100;1105;1108;1115;1120;1128;1130;1139;1160;1166;1168;1172;1228;1239;1264;1270;1313;1335;1337;1363;1382;1384;1387;1415;1467…
RNAseq_upregulated_genes	7	transfac_public-M00034	V$P53_01	TP63,TP53	hg19-tss-centered-10kb-10species	0.0357718	4.94644	CDKN1A;ZMAT3;CALD1;RAP2B;BAX;DDIT4;RRM2B;AEN;ARNTL;ALDH4A1;PHLDA3;NHLH2;SLC12A4;ALDH3A1;RHOC;SULF2;ACER2;TGFB2;PDE4C;CCNG1;TMEM40;PAQR7;HHAT;CPEB4;IL4R;SHC4;LIF;CAPN2;C13orf31;ABAT;FAM83A;ZNF750;CSNK1G1;SYTL1;NEDD9;FGF13;NTN4;C14orf159;EPS8L2;TRIM29;MAST4;MAPK15;KRT20;LRP1;KRT86;ST3GAL5;RAB5B;TRAK1;AHNAK2;STEAP3;COL17A1;C5orf4;SYNPO;UGT1A6;NFATC2;RASSF2;MAP3K1;FOSL1;FBLIM1;BTG2;TNFRSF10B;FHL2;NYN…	CDKN1A;ZMAT3;CALD1;RAP2B;BAX;DDIT4;RRM2B;AEN;ARNTL;ALDH4A1;PHLDA3;NHLH2;SLC12A4;ALDH3A1;RHOC;SULF2;ACER2;TGFB2;PDE4C;CCNG1;TMEM40;PAQR7;HHAT;CPEB4;IL4R;SHC4;LIF;CAPN2;C13orf31;ABAT;FAM83A;ZNF750;CSNK1G1;SYTL1;NEDD9;FGF13;NTN4;C14orf159;EPS8L2;TRIM29;MAST4;MAPK15;KRT20;LRP1;KRT86;ST3GAL5;RAB5B;TRAK1;AHNAK2;STEAP3;COL17A1;C5orf4;SYNPO;UGT1A6;NFATC2;RASSF2;MAP3K1;FOSL1;FBLIM1;BTG2;TNFRSF10B;FHL2;NYN…	1;7;10;16;18;20;23;31;34;35;36;45;60;84;115;116;134;158;185;188;191;192;209;230;278;292;294;299;305;317;325;337;350;366;433;456;463;496;510;518;557;558;575;576;598;648;649;660;663;720;746;758;770;772;805;810;844;850;896;897;903;905;911;933;938;952;972;982;1032;1045;1056;1073;1083;1120;1134;1154;1167;1181;1213;1230;1254;1278;1321;1340;1355;1396;1404;1420;1425;1438;1446;1472;1477;1483;1500;1502;154…
RNAseq_upregulated_genes	8	yetfasco-1621	YNL068C	FOXA1,FOXP1,FOXK1,FOXJ3,FOXJ1,FOXG1,FOXA3,FOXO3,FOXO1,FOXA2,FOXF2,FOXO4	hg19-tss-centered-10kb-10species	0.0354564	4.86622	PIK3IP1;BTG1;YPEL2;TXNIP;TMEM86A;FRMPD2;PPM1D;MTRNR2L6;LOC100129716;CDKN1A;SLC12A6;ZFYVE1;CYGB;LMBR1L;RAP2B;ATP10D;ABCA1;MTRNR2L2;BBC3;CITED2;GLUL;SASH1;KANK3;SSTR5;TGFB2;SHC4;ARNTL;NFATC2;SPOCK2;EFCAB10;FOS;SYTL2;RIN2;GALC;EOMES;NAV2	PIK3IP1;BTG1;YPEL2;TXNIP;TMEM86A;FRMPD2;PPM1D;MTRNR2L6;LOC100129716;CDKN1A;SLC12A6;ZFYVE1;CYGB;LMBR1L;RAP2B;ATP10D;ABCA1;MTRNR2L2;BBC3;CITED2;GLUL;SASH1;KANK3;SSTR5;TGFB2;SHC4;ARNTL;NFATC2;SPOCK2;EFCAB10;FOS;SYTL2;RIN2;GALC;EOMES;NAV2;LTBP2;PLCL2;DDIT4;PLAU;YPEL3;KLF4;FAM189A2;KLHL24;MBNL2;RND3;NEDD9;GATS;SLC25A45;DIXDC1;LHFPL2;PDK4;MXD4;ZFHX2;STAT6;CYP4F8;LRRC37A3;UGT1A6;ZNF323;EPAS1;RAB5B;PRINS…	29;31;37;57;58;60;66;68;72;76;82;112;116;132;154;155;181;197;210;216;218;222;228;237;251;252;272;295;311;314;343;347;352;358;365;378;449;452;454;468;507;515;552;553;562;571;592;646;657;674;704;716;737;749;751;770;783;799;833;871;880;963;997;1087;1094;1115;1144;1153;1158;1171;1188;1221;1318;1325;1350;1351;1371;1434;1443;1460;1479;1505;1524;1579;1602;1668;1686;1704;1707;1750;1791;1799;1802;1808;181…
RNAseq_upregulated_genes	9	transfac_pro-M01655	V$P53_05	TP63,TP53,TP73	hg19-tss-centered-10kb-10species	0.0352698	4.81876	CDKN1A;ZMAT3;DDIT4;SLC12A4;CSNK1G1;CPEB4;RAP2B;ABCA12;RHOC;FOS;RPS27L;ARNTL;ALDH4A1;CYP4F8;RRM2B;CALD1;FAS;CAPN2;AEN;TRIM22;CCNG1;PDE4C;ACER2;TGFB2;PHLDA3;STEAP3;ZNF561;TGFBI;TRIM38;NYNRIN;FOSL1;ALDH3A1;SLC26A2;PMP22;MFGE8;ACTA2;TMBIM1;CUEDC1;HSPA4L;GADD45A;MTRNR2L6;ORAI3;C5orf4;NTN4;RIN2;EFCAB10;C16orf5;NEAT1;GPR87;NAV2;GPR173;MAPK15;DEPDC6;FAM83A;DKK1;CLCA2;SPATA18;MYPN;FGF13;NHLH2;SLC7A8;NFATC…	CDKN1A;ZMAT3;DDIT4;SLC12A4;CSNK1G1;CPEB4;RAP2B;ABCA12;RHOC;FOS;RPS27L;ARNTL;ALDH4A1;CYP4F8;RRM2B;CALD1;FAS;CAPN2;AEN;TRIM22;CCNG1;PDE4C;ACER2;TGFB2;PHLDA3;STEAP3;ZNF561;TGFBI;TRIM38;NYNRIN;FOSL1;ALDH3A1;SLC26A2;PMP22;MFGE8;ACTA2;TMBIM1;CUEDC1;HSPA4L;GADD45A;MTRNR2L6;ORAI3;C5orf4;NTN4;RIN2;EFCAB10;C16orf5;NEAT1;GPR87;NAV2;GPR173;MAPK15;DEPDC6;FAM83A;DKK1;CLCA2;SPATA18;MYPN;FGF13;NHLH2;SLC7A8;NFATC…	1;5;6;17;20;22;24;31;37;47;49;63;68;84;109;117;135;164;174;195;226;236;243;245;266;276;304;305;311;320;334;353;356;362;405;427;466;476;500;511;553;563;579;595;674;675;686;711;714;746;755;775;793;820;822;833;858;924;938;942;944;948;953;969;987;998;1017;1022;1055;1079;1129;1138;1140;1159;1170;1182;1197;1199;1209;1212;1217;1225;1241;1257;1304;1325;1340;1360;1370;1406;1438;1439;1440;1468;1526;1528;15…
RNAseq_upregulated_genes	10	homer-M00139	p53(p53)/p53-ChIP-Chip/Homer	TP63,TP53,TP73	hg19-tss-centered-10kb-10species	0.0350086	4.7523	CDKN1A;ZMAT3;MDM2;RAP2B;DDIT4;CPEB4;CSNK1G1;CYP4F8;SLC12A4;ARNTL;CCNG1;ABCA12;CALD1;NEAT1;RPS27L;USP2;GPR87;NTN4;TGFB2;FOSL1;ZNF323;GPR173;RRM2B;FOS;TRIM22;BBC3;LMO7;FAS;C13orf31;PDE4C;TMEM45B;GADD45A;RHOQ;ALDH4A1;COL17A1;CAPN1;LIMK2;LHFPL2;SLC26A2;NHLH2;PAQR7;NYNRIN;ALDH3A1;RAB40B;MXD4;SYBU;CAPN2;KANK3;TGFBI;NAV2;FGF13;MKNK2;FILIP1L;SYNPO;FHL2;C18orf1;SLC7A8;NFATC2;RIN2;RAB5B;MAP2;SRGAP3;RHOC;SE…	CDKN1A;ZMAT3;MDM2;RAP2B;DDIT4;CPEB4;CSNK1G1;CYP4F8;SLC12A4;ARNTL;CCNG1;ABCA12;CALD1;NEAT1;RPS27L;USP2;GPR87;NTN4;TGFB2;FOSL1;ZNF323;GPR173;RRM2B;FOS;TRIM22;BBC3;LMO7;FAS;C13orf31;PDE4C;TMEM45B;GADD45A;RHOQ;ALDH4A1;COL17A1;CAPN1;LIMK2;LHFPL2;SLC26A2;NHLH2;PAQR7;NYNRIN;ALDH3A1;RAB40B;MXD4;SYBU;CAPN2;KANK3;TGFBI;NAV2;FGF13;MKNK2;FILIP1L;SYNPO;FHL2;C18orf1;SLC7A8;NFATC2;RIN2;RAB5B;MAP2;SRGAP3;RHOC;SE…	1;4;7;8;12;23;29;32;34;45;50;52;69;88;96;114;116;121;168;173;186;205;246;250;258;295;307;345;381;396;404;405;407;414;437;466;478;493;503;514;516;530;555;580;610;637;674;683;688;702;723;757;765;772;782;791;827;828;829;849;871;874;877;903;917;920;922;955;961;968;985;992;998;1020;1024;1025;1077;1108;1124;1131;1132;1148;1159;1166;1169;1177;1216;1242;1247;1248;1258;1263;1296;1315;1320;1341;1355;1375;1…
RNAseq_upregulated_genes	11	transfac_public-M00287	V$NFY_01	NFYC,NFYB,NFYA,POLE4,POLE3,YBX1	hg19-tss-centered-10kb-10species	0.0347902	4.69677	ARID4A;ARNTL;HIST1H2AI;MXD4;HIST2H2BE;TXNIP;WBP1;ADCK3;PNRC1;ALDH4A1;HES1;SLC25A42;MXD1;ARRDC4;KDM6B;PIK3R3;RAP2B;CCNG1;RHOQ;MKNK2;CCNG2;DUSP10;SESN3;LPXN;PIK3IP1;DUSP6;HLA-F;HIST1H2BC;SOX9;KIAA1539;MAF;SESN2;CAT;WDR81;SERTAD1;C20orf194;KDM4A;C1orf183;MGC23284;SLC43A2;C17orf91;ABAT	ARID4A;ARNTL;HIST1H2AI;MXD4;HIST2H2BE;TXNIP;WBP1;ADCK3;PNRC1;ALDH4A1;HES1;SLC25A42;MXD1;ARRDC4;KDM6B;PIK3R3;RAP2B;CCNG1;RHOQ;MKNK2;CCNG2;DUSP10;SESN3;LPXN;PIK3IP1;DUSP6;HLA-F;HIST1H2BC;SOX9;KIAA1539;MAF;SESN2;CAT;WDR81;SERTAD1;C20orf194;KDM4A;C1orf183;MGC23284;SLC43A2;C17orf91;ABAT;TSPYL2;PDK4;C5orf41;MSX2;HIST2H2BF;CDKN1A;EML2;PPP2R5B;HIST1H3A;AEN;ASB9;RFX5;SHC4;PDCD4;C12orf5;FAM161B;RPS6KA2;NAV…	4;16;23;25;30;52;73;85;87;93;97;127;148;167;176;181;187;205;207;208;232;239;240;251;270;280;281;318;323;343;369;372;384;386;423;426;436;437;446;465;470;483;514;523;553;573;621;668;702;711;746;761;765;769;791;834;842;898;899;908;917;937;954;971;973;975;986;991;1023;1027;1058;1077;1081;1094;1150;1157;1210;1232;1250;1318;1337;1382;1404;1420;1454;1455;1482;1521;1569;1575;1654;1688;1714;1759;1772;1775…
RNAseq_upregulated_genes	12	homer-M00124	NFY(CCAAT)/Promoter/Homer	NFYC,NFYB,NFYA,POLE3	hg19-tss-centered-10kb-10species	0.0344431	4.60848	MXD4;HES1;HIST2H2BE;RAP2B;ARNTL;ADCK3;ARID4A;TXNIP;HIST1H2AI;PNRC1;KLK6;SLC25A42;PIK3R3;ALDH4A1;SESN3;PIK3IP1;WDR81;C5orf41;WBP1;MKNK2;TSPYL2;ARRDC4;LPXN;HLA-F;ABAT;PPP2R5B;KDM6B;MXD1;SLC43A2;MAF;CAT;CDKN1A;HIST1H2BC;CCNG2;RAB40B;CLSTN3;SERTAD1;C1orf183;C20orf194;ARL15;MGC23284;CDKL5;SOX9;CCNG1;KIAA1539;PDK4;DUSP10;FAM161B;DUSP6;FGD3;SESN2;MSX2;PPP1R3B;SARDH	MXD4;HES1;HIST2H2BE;RAP2B;ARNTL;ADCK3;ARID4A;TXNIP;HIST1H2AI;PNRC1;KLK6;SLC25A42;PIK3R3;ALDH4A1;SESN3;PIK3IP1;WDR81;C5orf41;WBP1;MKNK2;TSPYL2;ARRDC4;LPXN;HLA-F;ABAT;PPP2R5B;KDM6B;MXD1;SLC43A2;MAF;CAT;CDKN1A;HIST1H2BC;CCNG2;RAB40B;CLSTN3;SERTAD1;C1orf183;C20orf194;ARL15;MGC23284;CDKL5;SOX9;CCNG1;KIAA1539;PDK4;DUSP10;FAM161B;DUSP6;FGD3;SESN2;MSX2;PPP1R3B;SARDH;NR2E3;C17orf91;NAV2;SSTR5;SHC4;PDCD4;K…	2;5;25;26;43;48;50;54;69;89;122;128;132;133;154;167;206;231;234;242;261;264;267;269;270;287;296;318;333;368;373;392;400;404;422;441;452;464;474;484;485;545;548;559;568;595;610;614;620;622;624;637;648;649;697;702;778;794;839;843;865;887;922;1016;1031;1048;1068;1125;1156;1202;1247;1259;1260;1261;1267;1274;1300;1386;1409;1435;1449;1465;1466;1468;1528;1599;1630;1646;1654;1667;1683;1725;1729;1738;1764…
RNAseq_upregulated_genes	13	factorbook-NFY	NFY	NFYC,NFYB,NFYA,POLE4,POLE3,YBX1	hg19-tss-centered-10kb-10species	0.0342565	4.56101	ARID4A;MXD4;HIST2H2BE;HIST1H2AI;HES1;PNRC1;ARNTL;TXNIP;ADCK3;MKNK2;ALDH4A1;WBP1;PIK3R3;SESN3;ARRDC4;MXD1;PIK3IP1;RAP2B;KDM6B;LPXN;CCNG1;SLC25A42;DUSP10;CCNG2;HIST1H2BC;CAT;C1orf183;PPP2R5B;C5orf41;MGC23284;DUSP6;KDM4A;TSPYL2;SESN2;SOX9;WDR81;ABAT;SERTAD1;SLC43A2;C17orf91;MAF;RHOQ;AEN;SHC4;CDKN1A;KLF9;PDK4;HLA-F;HIST2H2BF;C20orf194;CLSTN3;TOM1L2;RAB40B;NR2E3;FAM161B;MSX2;CDKL5;KIAA1539;FGD3;ARL15;…	ARID4A;MXD4;HIST2H2BE;HIST1H2AI;HES1;PNRC1;ARNTL;TXNIP;ADCK3;MKNK2;ALDH4A1;WBP1;PIK3R3;SESN3;ARRDC4;MXD1;PIK3IP1;RAP2B;KDM6B;LPXN;CCNG1;SLC25A42;DUSP10;CCNG2;HIST1H2BC;CAT;C1orf183;PPP2R5B;C5orf41;MGC23284;DUSP6;KDM4A;TSPYL2;SESN2;SOX9;WDR81;ABAT;SERTAD1;SLC43A2;C17orf91;MAF;RHOQ;AEN;SHC4;CDKN1A;KLF9;PDK4;HLA-F;HIST2H2BF;C20orf194;CLSTN3;TOM1L2;RAB40B;NR2E3;FAM161B;MSX2;CDKL5;KIAA1539;FGD3;ARL15;…	7;19;32;38;39;57;58;61;68;88;89;90;133;148;152;160;166;178;213;220;239;253;261;263;309;316;317;335;354;359;383;388;403;410;433;438;457;473;475;498;505;509;527;542;558;590;606;625;648;653;679;745;761;763;772;777;800;861;929;931;960;962;963;979;985;988;992;1045;1066;1068;1076;1080;1093;1098;1110;1206;1239;1241;1313;1321;1341;1349;1351;1372;1441;1456;1554;1555;1578;1606;1637;1666;1691;1698;1765;1770…
RNAseq_upregulated_genes	14	jaspar-MA0060.1	NFYA	NFYC,NFYB,NFYA,POLE4,POLE3,YBX1	hg19-tss-centered-10kb-10species	0.0341781	4.54107	ARID4A;ARNTL;HIST1H2AI;MXD4;HIST2H2BE;TXNIP;WBP1;ADCK3;PNRC1;HES1;ALDH4A1;SLC25A42;MXD1;ARRDC4;PIK3R3;RAP2B;RHOQ;MKNK2;KDM6B;DUSP10;CCNG1;LPXN;PIK3IP1;SESN3;CCNG2;DUSP6;HIST1H2BC;KDM4A;KIAA1539;HLA-F;SESN2;CAT;SERTAD1;C1orf183;SLC43A2;C20orf194;ABAT;TSPYL2;MGC23284;SOX9;C5orf41;WDR81;PDK4;C17orf91;MSX2;HIST2H2BF;RFX5;MAF;PPP2R5B;SHC4;EML2;AEN;CDKN1A;ASB9;NR2E3;C12orf5;PDCD4;ARL15;HIST1H3A;FDXR;BC…	ARID4A;ARNTL;HIST1H2AI;MXD4;HIST2H2BE;TXNIP;WBP1;ADCK3;PNRC1;HES1;ALDH4A1;SLC25A42;MXD1;ARRDC4;PIK3R3;RAP2B;RHOQ;MKNK2;KDM6B;DUSP10;CCNG1;LPXN;PIK3IP1;SESN3;CCNG2;DUSP6;HIST1H2BC;KDM4A;KIAA1539;HLA-F;SESN2;CAT;SERTAD1;C1orf183;SLC43A2;C20orf194;ABAT;TSPYL2;MGC23284;SOX9;C5orf41;WDR81;PDK4;C17orf91;MSX2;HIST2H2BF;RFX5;MAF;PPP2R5B;SHC4;EML2;AEN;CDKN1A;ASB9;NR2E3;C12orf5;PDCD4;ARL15;HIST1H3A;FDXR;BC…	6;16;20;24;43;45;74;82;86;89;96;124;127;154;161;180;195;204;206;215;225;226;227;243;268;292;295;326;341;343;350;359;402;414;416;436;460;478;495;500;505;517;524;533;613;625;636;655;664;680;723;747;759;762;820;830;850;855;881;914;937;941;947;968;990;1005;1014;1042;1046;1056;1075;1100;1106;1125;1143;1144;1146;1181;1242;1268;1283;1298;1325;1406;1408;1424;1487;1519;1549;1605;1624;1679;1691;1693;1698;1…
RNAseq_upregulated_genes	15	homer-M00063	FOXP1(Forkhead)/H9-FOXP1-ChIP-Seq(GSE31006)/Homer	FOXO3,FOXP1,FOXK1,FOXJ3,FOXJ1,FOXA1,FOXO1,FOXA2,FOXF2	hg19-tss-centered-10kb-10species	0.0336911	4.41719	YPEL2;LOC100129716;BBC3;BTG1;MTRNR2L6;MTRNR2L2;PIK3IP1;NFATC2;PPM1D;SLC12A6;AFF3;ADCK3;SPOCK2;YPEL3;CITED2;CYGB;TXNIP;PLAU;ATP10D;LMBR1L;TRAK1;RIN2;CDKN1A;FGF13;DDIT4;C5orf41;ARNTL;SYTL2;BIK;KLHL24;EFCAB10;MBNL2;FOS	YPEL2;LOC100129716;BBC3;BTG1;MTRNR2L6;MTRNR2L2;PIK3IP1;NFATC2;PPM1D;SLC12A6;AFF3;ADCK3;SPOCK2;YPEL3;CITED2;CYGB;TXNIP;PLAU;ATP10D;LMBR1L;TRAK1;RIN2;CDKN1A;FGF13;DDIT4;C5orf41;ARNTL;SYTL2;BIK;KLHL24;EFCAB10;MBNL2;FOS;EOMES;KANK3;NUAK1;MAST4;CYP4F8;ZFYVE1;TP53INP1;SLC7A8;ABCC3;TGFB2;TMEM45B;KLF4;AHNAK2;SSTR5;FHL2;PDK4;EPAS1;CAPN1;KHNYN;RBL2;FAM189A2;DAPK1;MDM2;GBP2;PNRC1;NAV2;COL17A1;PRRG1;SYBU;LRR…	7;25;26;30;36;49;51;52;53;82;86;97;98;137;141;144;155;162;198;204;208;214;228;241;251;295;300;303;315;318;351;353;364;415;456;469;485;491;529;533;564;570;684;715;721;723;745;764;768;780;856;874;875;924;959;964;969;981;1051;1091;1102;1126;1132;1151;1198;1240;1244;1259;1265;1266;1277;1297;1319;1342;1350;1363;1370;1428;1440;1451;1463;1521;1576;1581;1584;1599;1609;1689;1734;1735;1748;1752;1802;1806;1…
RNAseq_upregulated_genes	16	yetfasco-2002	YIL131C	FOXO3,FOXP1,FOXK1,FOXJ3,FOXJ1,FOXG1,FOXA1,FOXO1,FOXA2,FOXF2,FOXO4	hg19-tss-centered-10kb-10species	0.0336593	4.40912	YPEL2;FRMPD2;PIK3IP1;CITED2;ATP10D;BBC3;LOC100129716;BTG1;PPM1D;EFCAB10;KHNYN;CDKN1A;CYGB;TMEM86A;MTRNR2L6;SLC12A6;YPEL3;TXNIP;NFATC2;SPOCK2;EOMES;MTRNR2L2;SHC4;DDIT4;KANK3;KLF4;LMBR1L;AFF3;ZFYVE1;ADCK3;C5orf41;FOS;ARNTL;MBNL2;NAV2;NEDD9;SSTR5;FHL2;GLUL;SYTL2;GALC;TGFB2;CYP4F8;GPR173;TP53INP1;LRRC37A3;PBXIP1;RAP2B;RAB5B;PLAU;RIN2	YPEL2;FRMPD2;PIK3IP1;CITED2;ATP10D;BBC3;LOC100129716;BTG1;PPM1D;EFCAB10;KHNYN;CDKN1A;CYGB;TMEM86A;MTRNR2L6;SLC12A6;YPEL3;TXNIP;NFATC2;SPOCK2;EOMES;MTRNR2L2;SHC4;DDIT4;KANK3;KLF4;LMBR1L;AFF3;ZFYVE1;ADCK3;C5orf41;FOS;ARNTL;MBNL2;NAV2;NEDD9;SSTR5;FHL2;GLUL;SYTL2;GALC;TGFB2;CYP4F8;GPR173;TP53INP1;LRRC37A3;PBXIP1;RAP2B;RAB5B;PLAU;RIN2;BIK;TXLNB;GCNT4;DIXDC1;FAM189A2;RND3;KLHL24;EPAS1;BCL2L1;SASH1;SLC2…	20;33;49;53;54;59;60;61;82;87;97;98;114;115;116;137;166;173;199;205;214;227;241;244;247;275;286;334;341;356;365;383;404;426;441;452;480;499;505;525;539;554;582;618;619;652;666;674;704;713;719;749;764;814;850;911;921;922;926;971;1038;1055;1069;1070;1101;1129;1133;1201;1216;1223;1245;1253;1287;1308;1376;1383;1408;1436;1456;1463;1491;1535;1579;1600;1623;1639;1676;1746;1796;1798;1831;1841;1865;1892;1…
RNAseq_upregulated_genes	17	jaspar-MA0316.1	HAP5	NFYC,NFYB,NFYA,POLE4	hg19-tss-centered-10kb-10species	0.0335418	4.37921	MAF;DUSP10;CCNG1;MXD4;WDR81;PNRC1;ALDH4A1;MDM2;RHOQ;ADCK3;PDK4;SESN3;ARRDC4;RPS6KA2;WBP1;SLC43A2;TXNIP;C17orf91;SESN2;SHC4;HIST2H2BF;ARNTL;CDKN1A;SERTAD1;CAPN1;KDM6B;MKNK2;CAT;TLE6;HIST1H2AI;C7orf60;AGR2;SNCAIP;KIAA1539;HIST2H2BE;SSTR5;EML2;SARDH;ASB9;DUSP6;C12orf5;PIK3R3;RAP2B;CYP24A1	MAF;DUSP10;CCNG1;MXD4;WDR81;PNRC1;ALDH4A1;MDM2;RHOQ;ADCK3;PDK4;SESN3;ARRDC4;RPS6KA2;WBP1;SLC43A2;TXNIP;C17orf91;SESN2;SHC4;HIST2H2BF;ARNTL;CDKN1A;SERTAD1;CAPN1;KDM6B;MKNK2;CAT;TLE6;HIST1H2AI;C7orf60;AGR2;SNCAIP;KIAA1539;HIST2H2BE;SSTR5;EML2;SARDH;ASB9;DUSP6;C12orf5;PIK3R3;RAP2B;CYP24A1;ABAT;MSX2;C1orf183;HIST1H3A;RFX5;AEN;LPXN;LRRC37A3;C1QTNF6;CDKL5;FGF13;FGD3;TMEM45B;HIST1H2BC;ST3GAL5;IQSEC2;KDM…	9;13;22;49;51;54;64;84;94;96;104;117;119;126;141;159;165;166;195;217;238;240;261;262;285;290;292;323;349;366;367;375;396;405;416;436;449;482;540;549;553;560;565;574;606;622;672;677;697;714;730;755;781;787;818;871;877;888;922;961;963;970;1037;1057;1068;1098;1111;1154;1205;1210;1223;1237;1245;1253;1267;1275;1285;1293;1317;1333;1346;1416;1419;1464;1525;1542;1551;1580;1612;1620;1638;1642;1651;1669;16…
RNAseq_upregulated_genes	18	wgEncodeHaibTfbsMcf7P300V0422111PkRep1.broadPeak.gz	p300/MCF-7/None	EP300	hg19-tss-centered-10kb-chip-encode-taipale-inhouse	0.0623361	4.36806	SPINK4;HSPB8;FILIP1L;C1QTNF6;NAV2;SEPT9;GPRC5A;FAM174B;CELSR2;NXNL2;KRT19;GDF15;SLC25A45;HES1;MALAT1;CUEDC1;AGR3;ABAT;NEAT1;NEDD9;DAPK1;UBE2H;CD22;LOC284379;TNFSF15;SYTL2;FHL2;SMAD3;SYT8;C15orf38;PAPSS2;PTPRE;HSH2D;RNF170;SH3BP5;RBL2;B4GALT1;GCNT4;LHFPL2;CCND1;WISP2;KDM4B;YPEL3;ID3;KIAA1370;C18orf1;FMN1;SOX9;AQP3;SERPINA1;ELF3;PNRC1;EDN1;LOC401109;PSCA;NCRNA00173;BTG1;FGD3;TSC22D3;KLK6;UGT1A6;MYP…	SPINK4;HSPB8;FILIP1L;C1QTNF6;NAV2;SEPT9;GPRC5A;FAM174B;CELSR2;NXNL2;KRT19;GDF15;SLC25A45;HES1;MALAT1;CUEDC1;AGR3;ABAT;NEAT1;NEDD9;DAPK1;UBE2H;CD22;LOC284379;TNFSF15;SYTL2;FHL2;SMAD3;SYT8;C15orf38;PAPSS2;PTPRE;HSH2D;RNF170;SH3BP5;RBL2;B4GALT1;GCNT4;LHFPL2;CCND1;WISP2;KDM4B;YPEL3;ID3;KIAA1370;C18orf1;FMN1;SOX9;AQP3;SERPINA1;ELF3;PNRC1;EDN1;LOC401109;PSCA;NCRNA00173;BTG1;FGD3;TSC22D3;KLK6;UGT1A6;MYP…	9;11;18;21;27;43;47;48;53;54;63;78;79;83;97;99;103;107;115;118;122;135;142;147;150;151;155;156;159;162;164;181;185;192;195;209;218;228;235;238;241;245;254;259;264;269;280;283;293;307;316;323;332;335;338;344;356;364;373;376;387;407;412;416;421;453;457;458;465;472;475;483;529;530;533;536;543;561;572;578;579;582;583;586;639;642;645;663;695;716;750;760;783;803;931;954;974;1008;1076;1146;1162;1196;122…
RNAseq_upregulated_genes	19	swissregulon-FOS_FOS_B-L1__JUN_B-D_.p2	FOS,JUNB,FOSL1,JUND,FOSB	BATF,FOS,JDP2,FOSB,JUNB,JUN,JUND,FOSL1,FOSL2	hg19-tss-centered-10kb-10species	0.0333944	4.34171	RGS20;SERTAD1;KIAA1539;FGF13;KDM6B;BMP1;KIAA0513;LAMC2;CDKN1A;PROM2;CLDN1;KRT16;GPR87;LAMB3;CAPN2;EDN2;OCIAD2;PRSS22;ANK1;YPEL3;LIF;COL7A1;LRRC37A3;TRAK1;GRIK5;SEPT9;GPR115;GADD45A;POU2F3;NUAK1;LOC402778;MYO1E;FHL2;ALOXE3;SHC4;SLC7A8;SLC25A45;MTRNR2L2;HES2;CSNK1G1;LMCD1;TMBIM1;KANK3;STAT6;MDM2;RAB40B;AQP3;GCNT2;NAV2;LRRC15;KLF9;FOSL1;A2LD1;C7orf60;AHNAK2;PVALB;TPP1;RAB5B;EPS8L2;ITGA3;MAF;CCNG2;CO…	RGS20;SERTAD1;KIAA1539;FGF13;KDM6B;BMP1;KIAA0513;LAMC2;CDKN1A;PROM2;CLDN1;KRT16;GPR87;LAMB3;CAPN2;EDN2;OCIAD2;PRSS22;ANK1;YPEL3;LIF;COL7A1;LRRC37A3;TRAK1;GRIK5;SEPT9;GPR115;GADD45A;POU2F3;NUAK1;LOC402778;MYO1E;FHL2;ALOXE3;SHC4;SLC7A8;SLC25A45;MTRNR2L2;HES2;CSNK1G1;LMCD1;TMBIM1;KANK3;STAT6;MDM2;RAB40B;AQP3;GCNT2;NAV2;LRRC15;KLF9;FOSL1;A2LD1;C7orf60;AHNAK2;PVALB;TPP1;RAB5B;EPS8L2;ITGA3;MAF;CCNG2;CO…	2;20;26;34;41;47;63;72;75;81;91;99;117;138;152;154;174;175;199;213;221;238;257;270;271;275;281;301;302;303;342;351;383;398;437;465;472;507;527;573;576;593;645;646;648;673;680;716;717;721;766;793;798;822;852;903;907;915;922;966;976;984;999;1011;1030;1058;1071;1080;1084;1085;1110;1112;1123;1129;1130;1179;1208;1221;1346;1365;1366;1383;1389;1416;1433;1441;1447;1450;1491;1500;1543;1544;1593;1602;1632;…
RNAseq_upregulated_genes	20	flyfactorsurvey-slp2_SANGER_5_FBgn0004567	FBgn0004567(slp2)	FOXQ1,FOXP3,FOXJ3,FOXK1,FOXJ1,FOXA1,FOXG1,FOXL1,FOXO3,FOXO1,FOXA2,FOXL2,FOXF1,FOXF2,FOXO4	hg19-tss-centered-10kb-10species	0.0331462	4.27858	ZFYVE1;NFATC2;YPEL2;PIK3IP1;FAM49A;PPM1D;CYGB;AFF3;LOC100129716;LMBR1L;SLC12A6;RIN2;NAV2;CITED2;BTG1;BBC3;SSTR5;DDIT4;EPAS1;SPOCK2;MTRNR2L2;COL17A1;EOMES;MXD1;TXNIP;EFCAB10;MTRNR2L6;ATP10D;YPEL3;MXD4;FGF13;ABCC3;C5orf41;KLHL24;CDKN1A;FHL2;KHNYN;MBNL2;SLC25A45;PLAU;SYTL2;LHFPL2;USP2;ZNF323;AHNAK2;SNAI2;RND3;SH3BGR;ARHGEF37;FAM198B;FLJ35776;RBL2;KANK3;ARNTL;SOX9;RGS20;FAM189A2;MAST4;KLF4;SMAD3;CAPN…	ZFYVE1;NFATC2;YPEL2;PIK3IP1;FAM49A;PPM1D;CYGB;AFF3;LOC100129716;LMBR1L;SLC12A6;RIN2;NAV2;CITED2;BTG1;BBC3;SSTR5;DDIT4;EPAS1;SPOCK2;MTRNR2L2;COL17A1;EOMES;MXD1;TXNIP;EFCAB10;MTRNR2L6;ATP10D;YPEL3;MXD4;FGF13;ABCC3;C5orf41;KLHL24;CDKN1A;FHL2;KHNYN;MBNL2;SLC25A45;PLAU;SYTL2;LHFPL2;USP2;ZNF323;AHNAK2;SNAI2;RND3;SH3BGR;ARHGEF37;FAM198B;FLJ35776;RBL2;KANK3;ARNTL;SOX9;RGS20;FAM189A2;MAST4;KLF4;SMAD3;CAPN…	22;24;28;37;47;71;73;76;82;112;119;127;140;141;164;165;194;219;231;242;252;256;273;276;282;287;295;307;329;330;369;373;397;402;412;438;440;455;489;507;534;584;597;607;617;649;657;670;733;736;802;820;857;871;904;911;935;949;959;970;972;976;991;995;998;1006;1019;1029;1092;1098;1105;1114;1117;1118;1207;1214;1240;1243;1245;1287;1289;1338;1341;1368;1385;1392;1405;1549;1552;1601;1684;1693;1702;1754;175…
RNAseq_upregulated_genes	21	swissregulon-NFY_A-B-C_.p2	NFYC,NFYB,NFYA	NFYC,NFYB,NFYA,POLE4,POLE3	hg19-tss-centered-10kb-10species	0.0331443	4.27811	TXNIP;PNRC1;MXD4;ADCK3;HES1;ALDH4A1;MKNK2;PIK3R3;WBP1;DUSP6;DUSP10;ABAT;SLC43A2;LPXN;SESN3;SLC25A42;HIST2H2BE;SESN2;CCNG1;KDM6B;CAT;C5orf41;C20orf194;ARID4A;ARL15;CDKN1A;C1orf183;SERTAD1;ARNTL;MGC23284;ARRDC4;PPP2R5B;KIAA1539;WDR81;KDM4A;KLF9;AEN;PLA2G3;HLA-F;SSTR5;MAF;MSX2;PIK3IP1;FGD3;PPP1R3B;YPEL3;HIST2H2BF;C17orf91;HIST1H2BC;SARDH;CCNG2;PDK4;RFX5;TIMP3;USP2;NAV2;RAB40B;FAM161B;UCP2;TMEM45B;PD…	TXNIP;PNRC1;MXD4;ADCK3;HES1;ALDH4A1;MKNK2;PIK3R3;WBP1;DUSP6;DUSP10;ABAT;SLC43A2;LPXN;SESN3;SLC25A42;HIST2H2BE;SESN2;CCNG1;KDM6B;CAT;C5orf41;C20orf194;ARID4A;ARL15;CDKN1A;C1orf183;SERTAD1;ARNTL;MGC23284;ARRDC4;PPP2R5B;KIAA1539;WDR81;KDM4A;KLF9;AEN;PLA2G3;HLA-F;SSTR5;MAF;MSX2;PIK3IP1;FGD3;PPP1R3B;YPEL3;HIST2H2BF;C17orf91;HIST1H2BC;SARDH;CCNG2;PDK4;RFX5;TIMP3;USP2;NAV2;RAB40B;FAM161B;UCP2;TMEM45B;PD…	5;10;11;14;16;23;51;60;73;74;78;101;109;124;135;137;150;198;230;243;245;271;279;281;287;290;291;305;320;332;344;349;382;394;449;481;505;513;532;570;581;593;618;665;688;691;695;705;737;742;752;767;828;844;851;886;890;901;903;915;973;975;984;988;1034;1046;1061;1076;1077;1082;1106;1131;1137;1139;1150;1164;1168;1205;1216;1217;1229;1246;1273;1292;1355;1437;1442;1490;1532;1542;1563;1572;1597;1620;1633;…
RNAseq_upregulated_genes	22	yetfasco-1537	YOR358W	NFYC,NFYB,NFYA,POLE4	hg19-tss-centered-10kb-10species	0.0331014	4.26719	DUSP10;MAF;CCNG1;MXD4;PNRC1;WDR81;ADCK3;ALDH4A1;MDM2;RPS6KA2;RHOQ;WBP1;ARRDC4;PDK4;SESN3;C17orf91;SESN2;TXNIP;SLC43A2;MKNK2;SHC4;ARNTL;CAT;KDM6B;HIST2H2BF;HIST1H2AI;CDKN1A;SERTAD1;AGR2;CAPN1;TLE6;C7orf60;ASB9;HIST2H2BE;SNCAIP;KIAA1539;SSTR5;SARDH;DUSP6;PIK3R3;EML2;ARID4A	DUSP10;MAF;CCNG1;MXD4;PNRC1;WDR81;ADCK3;ALDH4A1;MDM2;RPS6KA2;RHOQ;WBP1;ARRDC4;PDK4;SESN3;C17orf91;SESN2;TXNIP;SLC43A2;MKNK2;SHC4;ARNTL;CAT;KDM6B;HIST2H2BF;HIST1H2AI;CDKN1A;SERTAD1;AGR2;CAPN1;TLE6;C7orf60;ASB9;HIST2H2BE;SNCAIP;KIAA1539;SSTR5;SARDH;DUSP6;PIK3R3;EML2;ARID4A;PIK3IP1;RAP2B;MSX2;C12orf5;CYP24A1;ABAT;HIST1H3A;C1orf183;FGD3;RFX5;LRRC37A3;AEN;LPXN;KDM4A;CDKL5;C1QTNF6;TMEM45B;FGF13;USP2;HI…	13;14;20;45;64;65;81;82;99;107;108;113;119;120;134;166;181;190;192;209;244;254;255;258;279;285;302;323;327;336;395;422;433;441;445;470;477;488;492;510;511;526;575;624;626;662;671;688;718;719;741;758;784;811;829;830;854;863;884;896;912;945;957;978;986;995;1086;1087;1154;1165;1181;1192;1216;1291;1351;1356;1373;1375;1388;1393;1402;1410;1417;1426;1437;1442;1490;1499;1501;1539;1553;1555;1556;1585;1666…
RNAseq_upregulated_genes	23	yetfasco-1774	YNL068C	FOXO3,FOXP1,FOXK1,FOXJ3,FOXJ1,FOXG1,FOXA3,FOXD1,FOXA1,FOXO1,FOXA2,FOXF2,FOXO4	hg19-tss-centered-10kb-10species	0.0329334	4.22447	YPEL2;PPM1D;PIK3IP1;SLC12A6;CYP4F8;TMEM86A;CDKN1A;FRMPD2;BBC3;BTG1;EFCAB10;ATP10D;EOMES;HLA-F;KLF4;LMBR1L;TSC22D3;CITED2;CYGB;SERPINA1;SHC4;CCNG2;LOC100129716;C5orf41;SPOCK2;SYTL2;TXNIP;NEDD9;NAV2;LHFPL2;DDIT4;RIN2;RAP2B;SASH1;HES1;SULF2;KLHL24;YPEL3;ZFYVE1;PLAU;KANK3;SSTR5;GALC;CAPN13;ABCC3;FAM189A2;RND3;MTRNR2L6;FGF13	YPEL2;PPM1D;PIK3IP1;SLC12A6;CYP4F8;TMEM86A;CDKN1A;FRMPD2;BBC3;BTG1;EFCAB10;ATP10D;EOMES;HLA-F;KLF4;LMBR1L;TSC22D3;CITED2;CYGB;SERPINA1;SHC4;CCNG2;LOC100129716;C5orf41;SPOCK2;SYTL2;TXNIP;NEDD9;NAV2;LHFPL2;DDIT4;RIN2;RAP2B;SASH1;HES1;SULF2;KLHL24;YPEL3;ZFYVE1;PLAU;KANK3;SSTR5;GALC;CAPN13;ABCC3;FAM189A2;RND3;MTRNR2L6;FGF13;SLC25A45;ZNF323;MDM2;FOS;MCC;C17orf103;FHL2;LRRC37A3;MTRNR2L2;TGFB2;MBNL2;ADC…	9;16;27;32;36;37;38;40;43;63;82;86;100;128;157;170;189;199;202;203;208;210;240;259;300;314;332;357;396;404;411;412;429;434;439;452;463;471;527;555;579;596;615;629;645;646;663;669;681;756;788;837;884;909;995;1021;1024;1047;1053;1070;1107;1142;1152;1167;1201;1225;1256;1259;1292;1340;1367;1373;1391;1447;1460;1491;1562;1571;1589;1639;1642;1645;1655;1679;1685;1694;1702;1706;1734;1744;1747;1796;1822;18…
RNAseq_upregulated_genes	24	yetfasco-2003	YNL068C	FOXO3,FOXP1,FOXK1,FOXJ3,FOXP3,FOXG1,FOXJ1,FOXA1,FOXO1,FOXA2,FOXF2,FOXO4	hg19-tss-centered-10kb-10species	0.0328364	4.19979	YPEL2;CDKN1A;PIK3IP1;PPM1D;BBC3;SLC12A6;FRMPD2;MTRNR2L6;CYGB;CITED2;EOMES;BTG1;LMBR1L;MTRNR2L2;SPOCK2;ATP10D;LOC100129716;TMEM86A;RND3;FOS;EFCAB10;KLF4;MBNL2;YPEL3;TXNIP;TGFB2;ARNTL;ZFYVE1;KHNYN;SSTR5;GALC;KLHL24;ADCK3;DDIT4;KANK3;BIK;FGF13;PLAU;C5orf41;TSC22D3;SASH1;RAP2B;NAV2;GATS;TP53INP1;RIN2;NFATC2;AFF3;NEDD9;HES1	YPEL2;CDKN1A;PIK3IP1;PPM1D;BBC3;SLC12A6;FRMPD2;MTRNR2L6;CYGB;CITED2;EOMES;BTG1;LMBR1L;MTRNR2L2;SPOCK2;ATP10D;LOC100129716;TMEM86A;RND3;FOS;EFCAB10;KLF4;MBNL2;YPEL3;TXNIP;TGFB2;ARNTL;ZFYVE1;KHNYN;SSTR5;GALC;KLHL24;ADCK3;DDIT4;KANK3;BIK;FGF13;PLAU;C5orf41;TSC22D3;SASH1;RAP2B;NAV2;GATS;TP53INP1;RIN2;NFATC2;AFF3;NEDD9;HES1;SHC4;SLC25A45;NUAK1;MXD4;ODF2L;PRINS;ZNF323;SYTL2;FAM65C;DIRC3;GLUL;BCL2L1;TNS…	7;28;31;34;37;38;51;82;89;101;103;123;153;154;155;166;169;170;201;211;223;230;291;294;306;308;314;321;325;348;359;402;409;417;450;457;469;478;505;535;561;602;609;625;632;661;663;667;685;698;772;779;831;861;866;871;894;918;929;969;970;985;1013;1022;1048;1054;1110;1210;1248;1252;1343;1352;1381;1387;1441;1450;1494;1514;1544;1559;1560;1562;1587;1634;1653;1688;1711;1739;1772;1890;1936;1953;1959;1986;1…
RNAseq_upregulated_genes	25	taipale-NRCATGYYNNRRCAYGYN-Tp73-DBD	NRCATGYYNNRRCAYGYN-Tp73-DBD	TP63,TP53	hg19-tss-centered-10kb-10species	0.0326124	4.14283	CDKN1A;ZMAT3;CYP4F8;USP2;ABCA12;ZNF323;GPR87;MDM2;RPS27L;GADD45A;CPEB4;RAP2B;SPATA18;CSNK1G1;TGFBI;BBC3;SLC12A4;DDIT4;GPR173;HSPA4L;TRIM22;LIMK2;RAB40B;EFCAB10;MTRNR2L6;APOD;ADCK3;GRHL3;SSTR5;BTG1;CALD1;NEAT1;CCNG1;TNS4;ARHGDIB;C7orf60;C18orf1;PRINS;LIF;MAP3K1;C3orf57;FGF13;MAPRE3;SYT8;RAB5B;MXD4;LHFPL2;LMO7;ALDH3A1;RHOQ;FOS;CLDN1;CUEDC1;KCNK15;MBNL2;COL17A1;SYNPO;PLCL2;SYTL1;NMNAT2;SMOX;RLN2;MKN…	CDKN1A;ZMAT3;CYP4F8;USP2;ABCA12;ZNF323;GPR87;MDM2;RPS27L;GADD45A;CPEB4;RAP2B;SPATA18;CSNK1G1;TGFBI;BBC3;SLC12A4;DDIT4;GPR173;HSPA4L;TRIM22;LIMK2;RAB40B;EFCAB10;MTRNR2L6;APOD;ADCK3;GRHL3;SSTR5;BTG1;CALD1;NEAT1;CCNG1;TNS4;ARHGDIB;C7orf60;C18orf1;PRINS;LIF;MAP3K1;C3orf57;FGF13;MAPRE3;SYT8;RAB5B;MXD4;LHFPL2;LMO7;ALDH3A1;RHOQ;FOS;CLDN1;CUEDC1;KCNK15;MBNL2;COL17A1;SYNPO;PLCL2;SYTL1;NMNAT2;SMOX;RLN2;MKN…	1;5;15;16;18;32;37;44;54;78;81;90;92;96;100;113;120;135;137;141;159;178;204;209;218;222;250;285;311;451;468;471;482;505;518;582;585;598;609;648;649;657;671;698;716;735;741;755;763;772;776;785;794;827;842;856;923;925;951;954;984;995;1049;1078;1081;1101;1138;1150;1164;1175;1180;1181;1198;1208;1219;1255;1279;1333;1338;1351;1368;1386;1392;1425;1441;1446;1460;1469;1473;1485;1504;1508;1532;1564;1593;16…
RNAseq_upregulated_genes	26	wgEncodeHaibTfbsMcf7P300V0422111PkRep2.broadPeak.gz	p300/MCF-7/None	EP300	hg19-tss-centered-10kb-chip-encode-taipale-inhouse	0.0595164	4.07647	SPINK4;CELSR2;SEPT9;C1QTNF6;NAV2;NXNL2;KRT19;AGR3;GPRC5A;FILIP1L;WISP2;CUEDC1;HSPB8;KLF9;C15orf38;NEAT1;SYTL2;GDF15;CALML5;ABAT;SULF2;NEDD9;KRT80;SMAD3;FAM174B;FMN1;PSCA;GCNT4;PAPSS2;PTPRE;TSC22D3;PGLYRP2;MALAT1;UBE2H;YPEL3;FHL2;HSH2D;CD22;C5orf4;C16orf45;LOC284379;DDIT4;TSPAN1;SERPINA1;APOD;SYT8;RBL2;C3orf57;ELF3;CITED2;KDM4B;AQP3;CCND1;DAPK1;AGR2;MACC1;ABCC3;C14orf182;IGSF5;C2orf18;HES1;PRSS22;…	SPINK4;CELSR2;SEPT9;C1QTNF6;NAV2;NXNL2;KRT19;AGR3;GPRC5A;FILIP1L;WISP2;CUEDC1;HSPB8;KLF9;C15orf38;NEAT1;SYTL2;GDF15;CALML5;ABAT;SULF2;NEDD9;KRT80;SMAD3;FAM174B;FMN1;PSCA;GCNT4;PAPSS2;PTPRE;TSC22D3;PGLYRP2;MALAT1;UBE2H;YPEL3;FHL2;HSH2D;CD22;C5orf4;C16orf45;LOC284379;DDIT4;TSPAN1;SERPINA1;APOD;SYT8;RBL2;C3orf57;ELF3;CITED2;KDM4B;AQP3;CCND1;DAPK1;AGR2;MACC1;ABCC3;C14orf182;IGSF5;C2orf18;HES1;PRSS22;…	6;8;24;29;30;40;43;48;51;59;62;64;69;77;80;83;88;104;105;106;107;144;155;159;163;166;170;185;189;197;200;201;211;214;217;219;221;226;244;247;257;266;280;284;289;293;294;307;310;332;338;339;350;358;363;403;408;416;423;424;429;448;457;461;462;465;476;490;492;503;507;515;528;534;564;567;571;585;590;598;603;609;620;635;639;651;653;677;679;688;700;717;723;743;746;758;768;770;772;782;803;815;818;826;83…
RNAseq_upregulated_genes	27	jaspar-MA0314.1	HAP3	NFYC,NFYB,NFYA,POLE3	hg19-tss-centered-10kb-10species	0.0322747	4.05691	HIST2H2BE;ALDH4A1;HIST1H2AI;PNRC1;HES1;RHOQ;LPXN;DUSP10;MXD1;ADCK3;HIST1H2BC;PBXIP1;CDKN1A;MKNK2;RAP2B;TXNIP;SLC43A2;WBP1;KIAA1539;CAT;CCNG1;RFX5;ARRDC4;C1orf183;MXD4;KDM6B;EML2;SERTAD1;CDKL5;KLF9;HIST2H2BF;SSTR5;C17orf91;WDR81;PIK3R3;SESN2;PDK4;AFF3;C5orf41;MAF;FGD3;AEN;IQSEC2;TMEM45B;ARID4A;ABAT;HLA-DQB1;SESN3	HIST2H2BE;ALDH4A1;HIST1H2AI;PNRC1;HES1;RHOQ;LPXN;DUSP10;MXD1;ADCK3;HIST1H2BC;PBXIP1;CDKN1A;MKNK2;RAP2B;TXNIP;SLC43A2;WBP1;KIAA1539;CAT;CCNG1;RFX5;ARRDC4;C1orf183;MXD4;KDM6B;EML2;SERTAD1;CDKL5;KLF9;HIST2H2BF;SSTR5;C17orf91;WDR81;PIK3R3;SESN2;PDK4;AFF3;C5orf41;MAF;FGD3;AEN;IQSEC2;TMEM45B;ARID4A;ABAT;HLA-DQB1;SESN3;TIMP3;FGF13;DUSP6;SHC4;SH3BGR;MGC23284;GAD1;STAT6;FDXR;UCP2;MBNL2;MYO1E;USP2;NR2E3;SU…	4;17;42;46;68;104;106;112;128;139;162;164;174;202;206;228;230;234;245;246;259;264;269;283;284;285;295;341;345;348;379;407;417;420;423;453;481;502;520;528;536;558;560;566;580;581;584;601;626;653;689;710;794;796;822;836;858;869;960;965;969;970;984;997;1049;1050;1134;1164;1190;1199;1203;1223;1239;1269;1357;1365;1366;1380;1382;1408;1433;1536;1549;1550;1567;1633;1757;1758;1774;1792;1801;1823;1836;1945…
RNAseq_upregulated_genes	28	jaspar-MA0106.1	TP53	TP63,TP53	hg19-tss-centered-10kb-10species	0.0320414	3.99758	CDKN1A;ZMAT3;CALD1;AEN;ARNTL;RAP2B;BAX;FOSL1;RRM2B;ALDH3A1;ALDH4A1;PHLDA3;DDIT4;CCNG1;CPEB4;CYP4F8;NAV2;NHLH2;RHOC;PDE4C;TGFB2;SHC4;NEDD9;TP53INP2;KCNF1;LMCD1;FBLIM1;C12orf5;FLJ35776;EPS8L2;ARHGAP42;SLC12A4;CAPN2;TNFRSF10B;TGFBI;MAF;SULF2;ABCA1;CSNK1G1;LAMB3;FAM196A;CAPN1;GPR173;UGT1A6;RAB5B;EFCAB10;FOS;MBNL2;LHFPL2;LMO7;SNCAIP;TRIM22;TRAK1;SYTL1;NYNRIN;SSTR5;MYO1B;MDM2;COL17A1;EDN2;GADD45A;SYNPO…	CDKN1A;ZMAT3;CALD1;AEN;ARNTL;RAP2B;BAX;FOSL1;RRM2B;ALDH3A1;ALDH4A1;PHLDA3;DDIT4;CCNG1;CPEB4;CYP4F8;NAV2;NHLH2;RHOC;PDE4C;TGFB2;SHC4;NEDD9;TP53INP2;KCNF1;LMCD1;FBLIM1;C12orf5;FLJ35776;EPS8L2;ARHGAP42;SLC12A4;CAPN2;TNFRSF10B;TGFBI;MAF;SULF2;ABCA1;CSNK1G1;LAMB3;FAM196A;CAPN1;GPR173;UGT1A6;RAB5B;EFCAB10;FOS;MBNL2;LHFPL2;LMO7;SNCAIP;TRIM22;TRAK1;SYTL1;NYNRIN;SSTR5;MYO1B;MDM2;COL17A1;EDN2;GADD45A;SYNPO…	1;4;8;9;14;22;28;44;57;58;85;105;110;122;135;159;183;196;202;213;223;226;247;266;286;291;306;361;363;368;383;417;486;508;519;521;559;566;573;586;606;622;630;642;671;674;690;693;696;711;787;790;810;840;842;843;846;850;897;915;953;977;996;1074;1082;1102;1127;1132;1166;1182;1213;1223;1231;1238;1245;1296;1304;1319;1324;1383;1447;1470;1484;1489;1496;1499;1506;1524;1528;1558;1564;1569;1578;1592;1624;16…
RNAseq_upregulated_genes	29	wgEncodeHaibTfbsEcc1P300V0422111PkRep2.broadPeak.gz	p300/ECC-1/None	EP300	hg19-tss-centered-10kb-chip-encode-taipale-inhouse	0.0584397	3.96512	LIF;BCL2L1;FGF18;HES1;DUSP6;HES2;KLHDC7A;NEDD9;ALDH3A1;LOXL4;ITGB6;MYEOV;KRT80;NAV2;NT5E;FMN1;EPS8L2;AFAP1L2;SLC25A45;AHNAK2;UBASH3B;PRINS;SRMS;ABCC3;MFGE8;ELF3;CUEDC1;DDIT4;TNS4;KCNK15;ARHGEF37;PIK3R3;LAMB3;PMEPA1;UBE2H;CCND1;CDKN1A;HIST1H2BC;KLF9;SPTBN5;PLD1;SEPT9;MKNK2;TSPAN1;SYNPO;NUAK1;TAGLN;LTBP2;TMEM99;GPRC5A;NEAT1;MALAT1;FAS;ACTA2;OPHN1;PLAU;GCNT2;ADAMTS7;PRODH;NXNL2;PNRC1;CELSR2;PIK3R2;L…	LIF;BCL2L1;FGF18;HES1;DUSP6;HES2;KLHDC7A;NEDD9;ALDH3A1;LOXL4;ITGB6;MYEOV;KRT80;NAV2;NT5E;FMN1;EPS8L2;AFAP1L2;SLC25A45;AHNAK2;UBASH3B;PRINS;SRMS;ABCC3;MFGE8;ELF3;CUEDC1;DDIT4;TNS4;KCNK15;ARHGEF37;PIK3R3;LAMB3;PMEPA1;UBE2H;CCND1;CDKN1A;HIST1H2BC;KLF9;SPTBN5;PLD1;SEPT9;MKNK2;TSPAN1;SYNPO;NUAK1;TAGLN;LTBP2;TMEM99;GPRC5A;NEAT1;MALAT1;FAS;ACTA2;OPHN1;PLAU;GCNT2;ADAMTS7;PRODH;NXNL2;PNRC1;CELSR2;PIK3R2;L…	2;8;11;15;20;27;32;33;34;35;37;38;41;46;50;73;76;78;90;95;99;102;107;110;128;131;134;143;161;162;177;181;183;189;190;195;198;230;241;258;260;267;273;304;320;324;335;353;357;358;366;368;375;377;381;399;413;422;441;442;447;459;461;477;480;484;489;491;501;565;579;587;588;594;610;612;620;636;651;662;666;729;741;742;752;768;778;783;788;793;794;830;831;834;844;863;898;902;962;979;987;990;1004;1012;1029…
RNAseq_upregulated_genes	30	jaspar-MA0099.1	Fos	BATF,FOS,JDP2,FOSB,JUNB,JUN,JUND,ARNT,FOSL1,FOSL2	hg19-tss-centered-10kb-10species	0.0318361	3.94536	RGS20;KDM6B;FGF13;LAMC2;SERTAD1;KIAA0513;LAMB3;PRSS22;KIAA1539;CDKN1A;BMP1;GPR87;FHL2;SPNS2;LIF;OCIAD2;ITGA3;COL7A1;NAV2;CLDN1;MYO1E;CAPN2;GADD45A;LRRC37A3;PROM2;SSTR5;ZNF323;ALOXE3;FEZ1;SHC4;EDN2;KRT16;MAST4;AHNAK2;LMCD1;RHOQ;RAB5B;NFATC2;RHOC;SLC7A8;FOSL1;ADCK3;MACC1;LTBP2;UGT1A6	RGS20;KDM6B;FGF13;LAMC2;SERTAD1;KIAA0513;LAMB3;PRSS22;KIAA1539;CDKN1A;BMP1;GPR87;FHL2;SPNS2;LIF;OCIAD2;ITGA3;COL7A1;NAV2;CLDN1;MYO1E;CAPN2;GADD45A;LRRC37A3;PROM2;SSTR5;ZNF323;ALOXE3;FEZ1;SHC4;EDN2;KRT16;MAST4;AHNAK2;LMCD1;RHOQ;RAB5B;NFATC2;RHOC;SLC7A8;FOSL1;ADCK3;MACC1;LTBP2;UGT1A6;GRIK5;BBC3;CLU;ANK1;PCNXL2;KANK3;YPEL3;CSNK1G1;ATP10D;GPR115;HTR2C;MDM2;SEPT9;PLK3;MTRNR2L6;AQP3;SYNPO;TRAK1;CALD1;P…	1;10;17;36;39;82;89;130;141;142;144;168;185;194;197;203;219;235;240;242;247;260;263;309;317;339;349;363;372;380;395;405;415;416;417;420;437;473;515;520;546;547;549;561;576;655;741;764;782;792;818;842;855;867;877;899;901;911;948;972;979;1011;1021;1042;1045;1051;1053;1087;1170;1175;1182;1195;1199;1209;1214;1230;1305;1346;1354;1358;1377;1454;1475;1492;1537;1546;1548;1580;1594;1623;1637;1638;1692;170…
RNAseq_upregulated_genes	31	wgEncodeHaibTfbsEcc1P300V0422111PkRep1.broadPeak.gz	p300/ECC-1/None	EP300	hg19-tss-centered-10kb-chip-encode-taipale-inhouse	0.0580515	3.92498	LOXL4;HES1;NT5E;HES2;ITGB6;DUSP6;LIF;NAV2;KLHDC7A;MYEOV;AFAP1L2;ALDH3A1;BCL2L1;FGF18;NEDD9;PRINS;UBASH3B;KRT80;AHNAK2;OPHN1;KCNK15;SLC25A45;ARHGEF37;FMN1;MFGE8;HIST1H2BC;CUEDC1;CCND1;ABCC3;LAMB3;EPS8L2;DDIT4;ELF3;SRMS;PIK3R3;SPTBN5;SEPT9;UBE2H;NEAT1;LTBP2;TSPAN1;TAGLN;TNS4;B4GALT1;PNRC1;KLF9;GCNT2;CELSR2;ANXA3;ADAMTS7;HIST1H4H;CDKN1A;PMEPA1;SYNPO;CALD1;PLAU;ITGA3;RND3;LIMK2;MALAT1;MKNK2;ACTA2;WBS…	LOXL4;HES1;NT5E;HES2;ITGB6;DUSP6;LIF;NAV2;KLHDC7A;MYEOV;AFAP1L2;ALDH3A1;BCL2L1;FGF18;NEDD9;PRINS;UBASH3B;KRT80;AHNAK2;OPHN1;KCNK15;SLC25A45;ARHGEF37;FMN1;MFGE8;HIST1H2BC;CUEDC1;CCND1;ABCC3;LAMB3;EPS8L2;DDIT4;ELF3;SRMS;PIK3R3;SPTBN5;SEPT9;UBE2H;NEAT1;LTBP2;TSPAN1;TAGLN;TNS4;B4GALT1;PNRC1;KLF9;GCNT2;CELSR2;ANXA3;ADAMTS7;HIST1H4H;CDKN1A;PMEPA1;SYNPO;CALD1;PLAU;ITGA3;RND3;LIMK2;MALAT1;MKNK2;ACTA2;WBS…	6;8;16;19;32;35;49;52;58;59;69;71;73;74;80;94;100;101;107;108;112;113;117;127;132;150;153;161;166;172;190;194;195;199;201;202;206;212;236;258;260;264;270;271;297;299;301;305;321;325;342;345;347;348;355;383;392;396;399;413;414;420;450;472;477;485;499;517;520;521;526;605;621;633;657;659;667;669;677;704;709;720;722;738;740;747;753;766;786;798;804;808;822;846;856;891;911;919;948;952;965;973;980;1028;…
RNAseq_upregulated_genes	32	jaspar-PF0007.1	TGANTCA	BATF,SPI1,ARNT,JDP2,FOSB,JUNB,JUN,JUND,FOSL1,FOSL2,FOS	hg19-tss-centered-10kb-10species	0.0316794	3.90549	KDM6B;RGS20;SERTAD1;KIAA0513;LIF;KIAA1539;BMP1;PRSS22;LAMC2;FGF13;CDKN1A;COL7A1;CAPN2;SHC4;ANK1;CLDN1;PROM2;EDN2;OCIAD2;LMCD1;AQP3;LRRC37A3;YPEL3;SSTR5;KRT16;RASAL1;MYO1E;GPR87;FHL2;ITGA3;TRAK1;LAMB3;LRRC15;NAV2;GPR115;MAPRE3;DGKA;AHNAK2;FAM25A;FAM189A2;TMBIM1;LOC402778;ZNF323;SMAD3;ANXA3;ALOXE3;GOLGA7B;TMEM40;CLU;NUAK1;CNFN;NTSR1;ANTXR1;SRMS;SLC25A45;POU2F3;A2LD1;RAB5B;NFATC2;LRP1;SEPT9;BCL10;PR…	KDM6B;RGS20;SERTAD1;KIAA0513;LIF;KIAA1539;BMP1;PRSS22;LAMC2;FGF13;CDKN1A;COL7A1;CAPN2;SHC4;ANK1;CLDN1;PROM2;EDN2;OCIAD2;LMCD1;AQP3;LRRC37A3;YPEL3;SSTR5;KRT16;RASAL1;MYO1E;GPR87;FHL2;ITGA3;TRAK1;LAMB3;LRRC15;NAV2;GPR115;MAPRE3;DGKA;AHNAK2;FAM25A;FAM189A2;TMBIM1;LOC402778;ZNF323;SMAD3;ANXA3;ALOXE3;GOLGA7B;TMEM40;CLU;NUAK1;CNFN;NTSR1;ANTXR1;SRMS;SLC25A45;POU2F3;A2LD1;RAB5B;NFATC2;LRP1;SEPT9;BCL10;PR…	2;15;23;38;46;56;63;73;80;97;105;131;133;134;139;153;176;179;206;207;236;255;274;290;306;307;338;367;372;378;380;406;452;462;487;494;501;509;511;601;625;627;645;651;653;661;682;686;689;693;707;716;730;746;753;757;816;840;846;871;896;907;911;922;941;993;999;1021;1038;1055;1080;1118;1120;1130;1161;1162;1206;1208;1237;1263;1264;1292;1304;1317;1357;1365;1431;1455;1485;1488;1536;1546;1551;1560;1562;15…
RNAseq_upregulated_genes	33	taipale-NRGWACANNNTGTWCYN-NR3C1-DBD	NRGWACANNNTGTWCYN-NR3C1-DBD	NR3C1,AR,PGR	hg19-tss-centered-10kb-10species	0.0315786	3.87986	MXD4;GLUL;USP2;CDKN1A;KANK3;CPEB4;PCDHA10;C21orf63;MED23;TMEM229B;THSD4;BCL6;ZNF20;SLC7A8;TXNIP;NEDD9;SYNPO;KLF9;C13orf18	MXD4;GLUL;USP2;CDKN1A;KANK3;CPEB4;PCDHA10;C21orf63;MED23;TMEM229B;THSD4;BCL6;ZNF20;SLC7A8;TXNIP;NEDD9;SYNPO;KLF9;C13orf18;LCAT;C5orf41;FILIP1L;SYTL5;RHOQ;B4GALT1;TSC22D3;RND3;C14orf132;DUSP10;KIAA0513;LXN;ARNTL;TXLNB;ABCC3;NAV2;SMAD3;ASB9;LMO7;LHFPL2;ODZ4;C3orf57;DUSP6;ARL15;IQSEC2;TMEM53;HSD17B7P2;MAST4;NYNRIN;PGM2L1;KIAA1217;FAM198B;GPRC5A;LAMC2;C17orf108;RHCG;SULT1A1;NEAT1;RHOC;PHLDA3;MCC;SOX9…	5;12;16;21;40;49;53;57;71;81;89;103;112;130;131;133;141;142;152;174;210;224;245;272;273;345;352;361;372;385;391;418;457;482;511;547;574;584;590;607;636;672;689;708;741;784;864;882;885;901;908;921;955;968;1025;1030;1041;1049;1070;1077;1099;1119;1127;1130;1143;1187;1190;1207;1237;1277;1281;1350;1352;1440;1464;1501;1512;1527;1531;1541;1565;1573;1580;1600;1639;1658;1677;1683;1692;1728;1846;1879;1882;…
RNAseq_upregulated_genes	34	wgEncodeHaibTfbsT47dP300V0416102Dm002p1hPkRep1.broadPeak.gz	p300/T-47D/DMSO_0.02pct	EP300	hg19-tss-centered-10kb-chip-encode-taipale-inhouse	0.0569915	3.81536	CUEDC1;KRT19;HES1;CCND1;LOC401109;PNRC1;CITED2;EDN1;BCAS1;MED23;MALAT1;FAM174B;SEPT9;MXD4;DDIT4;PSG9;GPRC5A;NEDD9;C10orf116;C15orf38;CCNG2;SYBU;ID3;BLNK;CAPN2;SYT8;PIK3R3;BCL6;KRT4;TMEM45B;ABCA12;PGLYRP2;PREX1;NEAT1;KRT80;TSPAN1;TP53INP1;PSCA;ABCC3;FAM198B;ELF3;CALML5;RBL2;FAM83A;DUSP6;CLU;MKNK2;MACC1;UBE2H;BCL2L1;CLIP4;TGFB2;KRT15;NCRNA00173;SERPINA1;LIMK2;C3orf57;FHL2;PMEPA1;MAP3K1;AGR2;SYNPO;L…	CUEDC1;KRT19;HES1;CCND1;LOC401109;PNRC1;CITED2;EDN1;BCAS1;MED23;MALAT1;FAM174B;SEPT9;MXD4;DDIT4;PSG9;GPRC5A;NEDD9;C10orf116;C15orf38;CCNG2;SYBU;ID3;BLNK;CAPN2;SYT8;PIK3R3;BCL6;KRT4;TMEM45B;ABCA12;PGLYRP2;PREX1;NEAT1;KRT80;TSPAN1;TP53INP1;PSCA;ABCC3;FAM198B;ELF3;CALML5;RBL2;FAM83A;DUSP6;CLU;MKNK2;MACC1;UBE2H;BCL2L1;CLIP4;TGFB2;KRT15;NCRNA00173;SERPINA1;LIMK2;C3orf57;FHL2;PMEPA1;MAP3K1;AGR2;SYNPO;L…	31;33;41;43;44;46;56;57;62;72;92;93;104;106;110;116;121;123;134;135;141;142;154;165;167;178;179;204;211;222;225;226;232;233;250;253;256;268;269;272;281;309;311;314;315;317;322;326;333;337;345;359;368;390;396;398;407;411;413;417;422;432;448;451;459;468;473;477;482;501;509;515;524;536;563;568;580;586;622;623;627;639;642;662;666;687;690;701;709;720;723;728;737;742;758;763;778;790;796;804;805;817;830…
RNAseq_upregulated_genes	35	transfac_pro-M02434	F$HAP4_01	HOXC8,HOXB8,HOXD8,NFYC,NFYB,NFYA,POLE4	hg19-tss-centered-10kb-10species	0.0310505	3.74553	ARID4A;MKNK2;RHOQ;HIST1H2AI;CCNG1;ALDH4A1;WDR81;HIST2H2BE;RPS6KA2;SHC4;SOX9;WBP1;C17orf91;DUSP10;SERTAD1;PDK4;C20orf194;LPXN;CDKN1A;ASB9;CCNG2;CAT;TXNIP;PIK3R3;RAP2B;SESN2;KLF9;KDM6B;HIST1H3A;SARDH;PNRC1;TMEM45B;EPS8L1;UCP2;SLC43A2;MAF;ARRDC4;SESN3;MDM2;MXD4;IQSEC2;HIST2H2BF;SSTR5;NR2E3;C12orf5;FGD3;ARNTL;MSX2;HIST1H2BC;C1QTNF6;KIAA1539;FAM161B;RFX5;IVD;KANK3;PPP2R5B;FGF13;CDKL5;MAST4;SYTL5;ZNF32…	ARID4A;MKNK2;RHOQ;HIST1H2AI;CCNG1;ALDH4A1;WDR81;HIST2H2BE;RPS6KA2;SHC4;SOX9;WBP1;C17orf91;DUSP10;SERTAD1;PDK4;C20orf194;LPXN;CDKN1A;ASB9;CCNG2;CAT;TXNIP;PIK3R3;RAP2B;SESN2;KLF9;KDM6B;HIST1H3A;SARDH;PNRC1;TMEM45B;EPS8L1;UCP2;SLC43A2;MAF;ARRDC4;SESN3;MDM2;MXD4;IQSEC2;HIST2H2BF;SSTR5;NR2E3;C12orf5;FGD3;ARNTL;MSX2;HIST1H2BC;C1QTNF6;KIAA1539;FAM161B;RFX5;IVD;KANK3;PPP2R5B;FGF13;CDKL5;MAST4;SYTL5;ZNF32…	3;32;52;54;60;63;68;76;111;120;124;154;187;208;215;225;235;237;238;242;246;257;259;262;268;277;320;330;346;378;381;419;432;440;443;471;512;514;522;539;599;615;637;684;716;722;763;783;784;798;831;847;873;923;927;937;969;982;1000;1017;1039;1046;1054;1055;1059;1060;1082;1092;1093;1119;1170;1272;1284;1289;1312;1329;1338;1347;1391;1393;1429;1452;1467;1469;1543;1546;1555;1584;1600;1601;1619;1628;1643;1…
RNAseq_upregulated_genes	36	wgEncodeHaibTfbsMcf7Nr2f2sc271940V0422111PkRep2.broadPeak.gz	NR2F2_(SC-271940)/MCF-7/None	NR2F2	hg19-tss-centered-10kb-chip-encode-taipale-inhouse	0.0562264	3.73624	C15orf38;SPINK4;SEPT9;GDF15;PRSS22;NEAT1;ABAT;LOC643596;FAM174B;CAPN8;FER1L4;PTPRE;LOC284379;CELSR2;UBE2H;ABCC3;GPRC5A;HES1;CDKN1A;SYNPO;LOC401109;SYTL1;CAPN13;KDM6B;RBL2;LHFPL2;HSPB8;AQP3;IGSF5;C5orf4;TSC22D3;GCNT4;PP14571;SYTL2;TNFSF15;CALML5;DOCK1;C2orf18;VAMP5;SULF2;NCRNA00173;B4GALT1;SYTL5;ZNF433;ELF3;BCL2L1;C17orf103;C1QTNF6;SPOCK2;SPNS2;ITGA3;UGT1A6;DAPK1;SLC25A45;MUC5B;ADAMTS13;ARHGEF37;K…	C15orf38;SPINK4;SEPT9;GDF15;PRSS22;NEAT1;ABAT;LOC643596;FAM174B;CAPN8;FER1L4;PTPRE;LOC284379;CELSR2;UBE2H;ABCC3;GPRC5A;HES1;CDKN1A;SYNPO;LOC401109;SYTL1;CAPN13;KDM6B;RBL2;LHFPL2;HSPB8;AQP3;IGSF5;C5orf4;TSC22D3;GCNT4;PP14571;SYTL2;TNFSF15;CALML5;DOCK1;C2orf18;VAMP5;SULF2;NCRNA00173;B4GALT1;SYTL5;ZNF433;ELF3;BCL2L1;C17orf103;C1QTNF6;SPOCK2;SPNS2;ITGA3;UGT1A6;DAPK1;SLC25A45;MUC5B;ADAMTS13;ARHGEF37;K…	10;12;28;32;33;35;46;48;49;50;51;53;60;64;74;77;79;80;87;108;113;122;134;142;149;152;154;155;169;177;181;194;198;220;224;229;236;264;273;281;294;304;311;335;353;360;367;368;377;403;408;410;412;422;424;427;432;434;446;455;461;471;478;481;484;485;505;537;542;560;562;565;581;589;595;598;608;609;610;631;633;647;663;683;692;694;730;736;756;759;762;763;769;784;797;801;810;821;822;824;871;885;896;902;90…
RNAseq_upregulated_genes	37	wgEncodeSydhTfbsSknshRfx5IggrabPk.narrowPeak.gz	RFX5_(200-401-194)/SK-N-SH/None	RFX5	hg19-tss-centered-10kb-chip-encode-taipale-inhouse	0.0561481	3.72813	HLA-F;HLA-DQB1;GRIK5;HLA-DMA;TSPYL2;BTN2A2;MR1;C20orf194;HLA-DRB1;SESN2;CNTD2;RAB4B;TAP1;CCND1;LOC100129716;FLJ26850;MKNK2;CCNG2;RAB40B;MSX2;DYRK1B;TPP1;DDB2;MXD4;SESN3;RFX5;YPEL2;TUBA1A;KDM4A;UBE2H;MXD1;BBC3;GADD45G;RHOQ;PDCD4;PNRC1;LOC282997;C17orf91;NXNL2;WDR81;HLA-DRB5;KLF9;SLC43A2;TP53INP1;EML2;KDM6B;DDIT4;ZNF490;PIK3IP1;BBS12;SERTAD1;DAPK1;CAMK2B;MALAT1;TMEM53;MYO1E;CCDC96;PMEPA1;PIK3R3;SUO…	HLA-F;HLA-DQB1;GRIK5;HLA-DMA;TSPYL2;BTN2A2;MR1;C20orf194;HLA-DRB1;SESN2;CNTD2;RAB4B;TAP1;CCND1;LOC100129716;FLJ26850;MKNK2;CCNG2;RAB40B;MSX2;DYRK1B;TPP1;DDB2;MXD4;SESN3;RFX5;YPEL2;TUBA1A;KDM4A;UBE2H;MXD1;BBC3;GADD45G;RHOQ;PDCD4;PNRC1;LOC282997;C17orf91;NXNL2;WDR81;HLA-DRB5;KLF9;SLC43A2;TP53INP1;EML2;KDM6B;DDIT4;ZNF490;PIK3IP1;BBS12;SERTAD1;DAPK1;CAMK2B;MALAT1;TMEM53;MYO1E;CCDC96;PMEPA1;PIK3R3;SUO…	1;6;21;28;35;36;37;48;59;61;66;79;90;99;100;104;105;122;124;135;136;142;149;150;168;171;181;182;184;189;196;199;201;216;220;222;229;233;234;245;250;260;282;287;303;310;312;314;327;338;347;365;373;381;389;391;412;413;436;449;454;459;507;508;522;531;541;542;553;566;576;585;587;597;599;606;648;649;672;679;703;717;778;780;790;801;807;826;841;843;868;922;946;953;963;968;974;1025;1028;1029;1034;1052;10…
RNAseq_upregulated_genes	38	taipale-NRGNACANNNTGTNCYN-NR3C2-DBD	NRGNACANNNTGTNCYN-NR3C2-DBD	NR3C1,AR,PGR	hg19-tss-centered-10kb-10species	0.0309721	3.72559	MXD4;GLUL;USP2;CDKN1A;KANK3;CPEB4;C21orf63;TMEM229B;MED23;PCDHA10;BCL6;THSD4;TXNIP;NEDD9;ZNF20;C13orf18;KLF9;C5orf41;SLC7A8;SYNPO;FILIP1L	MXD4;GLUL;USP2;CDKN1A;KANK3;CPEB4;C21orf63;TMEM229B;MED23;PCDHA10;BCL6;THSD4;TXNIP;NEDD9;ZNF20;C13orf18;KLF9;C5orf41;SLC7A8;SYNPO;FILIP1L;RND3;RHOQ;SYTL5;B4GALT1;LCAT;NAV2;C14orf132;KIAA0513;ABCC3;LXN;PHLDA3;ARNTL;TXLNB;IQSEC2;MAST4;DUSP6;TSC22D3;ARL15;MCC;LHFPL2;RHCG;C3orf57;HSD17B7P2;GPRC5A;DUSP10;ASB9;TMEM53;SMAD3;LMO7;RHOC;DOCK1;NYNRIN;SSTR5;PGM2L1;CYGB;STEAP3;SHC4;FAM198B;LOC729375;C17orf108…	6;8;16;20;22;40;41;63;68;73;74;77;78;99;105;130;137;150;162;183;189;216;232;254;273;342;388;396;442;463;476;484;528;550;571;579;582;583;589;592;632;644;656;679;695;712;754;763;795;824;897;921;976;979;1012;1021;1023;1056;1066;1104;1124;1126;1130;1187;1199;1203;1234;1269;1272;1361;1362;1419;1430;1433;1456;1478;1528;1552;1553;1581;1633;1644;1672;1744;1812;1823;1849;1874;1900;1983;2035;2037;2046;2055…
RNAseq_upregulated_genes	39	homer-M01862	HAP2(MacIsaac)/Yeast	NFYC,NFYB,NFYA,POLE4,POLE3	hg19-tss-centered-10kb-10species	0.0309292	3.71467	ARID4A;MXD1;HIST2H2BE;MXD4;KLK6;RAP2B;ALDH4A1;WDR81;HIST1H2AI;MKNK2;MAF;RHOQ;C17orf82;SOX9;DUSP10;ASB9;NR2E3;TXNIP;PNRC1;CAT;HIST1H3A;SHC4;PDK4;PIK3R3;RPS6KA2;HES1;ARRDC4;SESN3;CCNG1;ARNTL;SLC43A2;HLA-F;ABAT;CCNG2;CDKL5;CDKN1A;TMEM45B;C5orf41;EFCAB10;GLS2;SULF2;SESN2;KIAA1539;KLF9;PPP2R5B;SERTAD1;CYP4F8;SARDH;KANK3;MAST4;SYTL5;C17orf91;BTG1;KDM6B	ARID4A;MXD1;HIST2H2BE;MXD4;KLK6;RAP2B;ALDH4A1;WDR81;HIST1H2AI;MKNK2;MAF;RHOQ;C17orf82;SOX9;DUSP10;ASB9;NR2E3;TXNIP;PNRC1;CAT;HIST1H3A;SHC4;PDK4;PIK3R3;RPS6KA2;HES1;ARRDC4;SESN3;CCNG1;ARNTL;SLC43A2;HLA-F;ABAT;CCNG2;CDKL5;CDKN1A;TMEM45B;C5orf41;EFCAB10;GLS2;SULF2;SESN2;KIAA1539;KLF9;PPP2R5B;SERTAD1;CYP4F8;SARDH;KANK3;MAST4;SYTL5;C17orf91;BTG1;KDM6B;C1orf183;C20orf194;HIST1H2BC;ARHGAP18;KDM4B;FGD3;H…	9;26;34;35;37;61;65;93;94;108;119;120;124;147;149;195;214;216;222;234;242;257;287;305;315;326;330;339;343;380;392;405;435;450;467;491;515;528;590;592;646;649;656;664;701;702;705;721;722;754;768;775;776;791;843;916;946;1013;1038;1040;1041;1058;1072;1084;1091;1098;1107;1156;1173;1235;1243;1274;1276;1284;1305;1316;1330;1379;1388;1392;1442;1444;1445;1457;1462;1489;1503;1584;1634;1647;1669;1682;1756;1…
RNAseq_upregulated_genes	40	wgEncodeHaibTfbsEcc1Tcf12V0422111PkRep2.broadPeak.gz	TCF12/ECC-1/None	TCF12	hg19-tss-centered-10kb-chip-encode-taipale-inhouse	0.0553475	3.64535	BCL2L1;NT5E;HES1;HES2;LIF;NAV2;KLHDC7A;MYEOV;FGF18;KRT80;ALDH3A1;LOXL4;ITGB6;DUSP6;KCNK15;FMN1;AFAP1L2;NEDD9;AHNAK2;PRINS;SLC25A45;EPS8L2;SRMS;ABCC3;UBASH3B;CUEDC1;DDIT4;CDKN1A;MFGE8;UBE2H;ELF3;HIST1H2BC;LAMB3;SEPT9;ARHGEF37;TNS4;MKNK2;PLD1;NEAT1;CCND1;SPTBN5;MXD4;KLF9;TSPAN1;MALAT1;CELSR2;PRODH;B4GALT1;SYNPO;C13orf29;LDB3;PRSS22;PLAU;NFATC4;HIST1H4H;ANK1;RAB26;FAS;SPNS2;ACTA2;LOC643008	BCL2L1;NT5E;HES1;HES2;LIF;NAV2;KLHDC7A;MYEOV;FGF18;KRT80;ALDH3A1;LOXL4;ITGB6;DUSP6;KCNK15;FMN1;AFAP1L2;NEDD9;AHNAK2;PRINS;SLC25A45;EPS8L2;SRMS;ABCC3;UBASH3B;CUEDC1;DDIT4;CDKN1A;MFGE8;UBE2H;ELF3;HIST1H2BC;LAMB3;SEPT9;ARHGEF37;TNS4;MKNK2;PLD1;NEAT1;CCND1;SPTBN5;MXD4;KLF9;TSPAN1;MALAT1;CELSR2;PRODH;B4GALT1;SYNPO;C13orf29;LDB3;PRSS22;PLAU;NFATC4;HIST1H4H;ANK1;RAB26;FAS;SPNS2;ACTA2;LOC643008;ANXA3;KIL…	2;4;5;8;17;19;23;24;35;45;49;54;55;59;63;67;69;71;74;77;78;81;96;109;132;137;140;153;181;186;189;200;204;205;208;211;219;228;242;250;253;254;259;263;279;314;342;356;359;379;390;391;398;430;436;454;455;456;458;459;460;537;559;562;564;574;584;597;605;620;632;653;659;661;686;693;694;716;754;783;788;808;817;863;873;888;941;951;957;961;968;1018;1038;1060;1091;1103;1106;1124;1167;1171;1204;1231;1241;12…
RNAseq_upregulated_genes	41	jaspar-PF0120.1	KRCTCNNNNMANAGC		hg19-tss-centered-10kb-10species	0.0306045	3.63208	HIST1H2BC;HIST1H2AI;HIST1H3H;HIST1H3A;HIST1H3E;HIST2H2BF;HIST2H2BE;GAD1;CELSR2;HIST1H4H;F2R;CDKL5;PARM1;SMAD3;HES1;MAP3K12;LOC643008;VWCE;SNCAIP;AFAP1L2;ZNF469;PROM2;TP53INP1;SYNPO;MCC;MYPN;FIBCD1;ELF3;IGFBP5;PPP1R3B;MXD4;PLCL2;YPEL2;DNAH1;TMEM117;CAPN1;SHC4;SYTL2;AFF3;ZNF423;MAGED2;NTSR1;C3orf52;SSTR5;TXLNB;PMEPA1;NAV2	HIST1H2BC;HIST1H2AI;HIST1H3H;HIST1H3A;HIST1H3E;HIST2H2BF;HIST2H2BE;GAD1;CELSR2;HIST1H4H;F2R;CDKL5;PARM1;SMAD3;HES1;MAP3K12;LOC643008;VWCE;SNCAIP;AFAP1L2;ZNF469;PROM2;TP53INP1;SYNPO;MCC;MYPN;FIBCD1;ELF3;IGFBP5;PPP1R3B;MXD4;PLCL2;YPEL2;DNAH1;TMEM117;CAPN1;SHC4;SYTL2;AFF3;ZNF423;MAGED2;NTSR1;C3orf52;SSTR5;TXLNB;PMEPA1;NAV2;PVRL4;ATP8A2;GCNT2;CDKN1A;GALC;ALPK3;CUEDC1;FOXI1;SYBU;WDR81;ST3GAL5;FGF13;AD…	2;4;22;28;33;49;65;66;103;104;111;131;159;182;184;189;210;211;230;280;290;317;326;342;352;369;378;396;397;420;426;458;461;462;494;512;526;528;533;534;557;574;586;610;613;630;636;670;685;745;833;847;850;862;868;872;879;885;905;916;938;945;949;1091;1105;1151;1156;1158;1206;1259;1260;1281;1312;1314;1325;1356;1360;1389;1398;1426;1431;1500;1511;1555;1573;1581;1589;1596;1645;1680;1704;1732;1737;1750;17…
RNAseq_upregulated_genes	42	tfdimers-MD00010	p53	decamer_p53	hg19-tss-centered-10kb-10species	0.0304384	3.58984	CDKN1A;DDIT4;ZMAT3;MDM2;CSNK1G1;CCNG1;SLC12A4;ARNTL;RAP2B;ABCA12;CALD1;CYP4F8;PDE4C;TGFB2;CPEB4;MXD4;FOSL1;USP2;SYT8;ALDH3A1;CAPN1;C13orf31;NEAT1;ALDH4A1;NFATC2;SNCAIP;CYFIP2;CUEDC1;GPR87;KRT20;NTN4;OXTR;COL17A1;PAQR7;RHOC;TMC7;KANK3;FILIP1L;BTG2;TRIM38;RRM2B;SHC4;WBSCR27;SRGAP3;TMEM45B;RAB40B;EFCAB10;CYGB;RPS27L;EPAS1;LHFPL2;NHLH2;MAF;GADD45A;MAP3K1;RHOQ;STEAP3;PBLD;FHL2;SEPT9;WISP2;SULT1A1;SOX9…	CDKN1A;DDIT4;ZMAT3;MDM2;CSNK1G1;CCNG1;SLC12A4;ARNTL;RAP2B;ABCA12;CALD1;CYP4F8;PDE4C;TGFB2;CPEB4;MXD4;FOSL1;USP2;SYT8;ALDH3A1;CAPN1;C13orf31;NEAT1;ALDH4A1;NFATC2;SNCAIP;CYFIP2;CUEDC1;GPR87;KRT20;NTN4;OXTR;COL17A1;PAQR7;RHOC;TMC7;KANK3;FILIP1L;BTG2;TRIM38;RRM2B;SHC4;WBSCR27;SRGAP3;TMEM45B;RAB40B;EFCAB10;CYGB;RPS27L;EPAS1;LHFPL2;NHLH2;MAF;GADD45A;MAP3K1;RHOQ;STEAP3;PBLD;FHL2;SEPT9;WISP2;SULT1A1;SOX9…	2;6;7;9;12;20;22;24;39;49;72;73;74;75;88;130;148;171;227;253;296;304;348;373;377;390;391;402;404;409;449;469;476;497;504;544;554;571;584;657;664;665;690;711;720;722;758;768;777;789;805;830;833;863;868;885;888;890;903;935;938;944;961;975;982;1006;1018;1043;1048;1051;1069;1089;1099;1100;1169;1182;1193;1208;1223;1232;1254;1267;1287;1290;1301;1302;1313;1323;1331;1353;1371;1377;1391;1428;1463;1471;147…
RNAseq_upregulated_genes	43	taipale-TTGGCANNNTGCCAR-NFIB-full	TTGGCANNNTGCCAR-NFIB-full	NFIC,NFIB,NFIA,NFIX,NF1	hg19-tss-centered-10kb-10species	0.030347	3.56658	TGFB2;SCD5;AGR2;SYT8;FBXO44;SLC12A4;ZMAT3;ITGA3;FGF18;PLEKHG1;C1orf183;FILIP1L;GAD1;SHC4;FAM49A;LMO7;ARHGEF37;PPM1D;C16orf5;PRICKLE2;ALS2CL;PIK3R3;ANXA4;CDKN1A;LIF;MDM2;ZNF323;SYNPO;MCC;DNAH1;SYT15;CALD1;DIXDC1;EDN1;RNF19A;ABCA12;NAV2;TMEM99;C13orf31;TIMP3;ABAT;COL16A1;PCNXL2;GADD45G;KLF9;PNRC1;LAMB3;KRT80;FGF13;PMP22;TSC22D3;MAP2;MBNL2;CLCA2;MXD4;NTSR1;CAPN1;AFAP1L2;FBLIM1;RASSF2;FSTL4;SEPT9;SUL…	TGFB2;SCD5;AGR2;SYT8;FBXO44;SLC12A4;ZMAT3;ITGA3;FGF18;PLEKHG1;C1orf183;FILIP1L;GAD1;SHC4;FAM49A;LMO7;ARHGEF37;PPM1D;C16orf5;PRICKLE2;ALS2CL;PIK3R3;ANXA4;CDKN1A;LIF;MDM2;ZNF323;SYNPO;MCC;DNAH1;SYT15;CALD1;DIXDC1;EDN1;RNF19A;ABCA12;NAV2;TMEM99;C13orf31;TIMP3;ABAT;COL16A1;PCNXL2;GADD45G;KLF9;PNRC1;LAMB3;KRT80;FGF13;PMP22;TSC22D3;MAP2;MBNL2;CLCA2;MXD4;NTSR1;CAPN1;AFAP1L2;FBLIM1;RASSF2;FSTL4;SEPT9;SUL…	1;46;49;84;86;87;89;90;92;103;114;140;156;158;162;166;174;197;206;211;229;244;245;260;271;285;288;304;324;377;411;457;462;528;555;564;589;591;619;631;636;644;646;647;709;749;791;822;829;838;887;888;928;949;999;1026;1036;1044;1071;1097;1103;1110;1139;1161;1165;1209;1217;1242;1261;1287;1296;1323;1325;1326;1390;1464;1466;1468;1502;1512;1519;1521;1526;1539;1548;1559;1607;1620;1631;1633;1666;1669;1677…
RNAseq_upregulated_genes	44	taipale-RCATTCCNNRCATTCCN-TEAD3-DBD	RCATTCCNNRCATTCCN-TEAD3-DBD	TEAD4	hg19-tss-centered-10kb-10species	0.0302723	3.54759	SH3TC2;CCND1;MAF;DUSP4;BCL2L1;LAMC2;RND3;KCNK3;C17orf108;EPS8L2;RNF144B;SLC31A2;ARID4A;SYNPO;MAG;KLHDC7A;NCKAP5L;TAGLN;CDKN1A;GRIK5;ALOXE3;FGD3;PRKX;PCNXL2;MDM2;C16orf45;PVRL4;FAM49A;PRICKLE2;BTG1;SYBU;PRINS;ATP10D;HTR2C;ITGA3;LHFPL2;CAPN1;NTN4;SHC4;RAB5B;NUAK1;DKK1;BRWD3;KANK3;MED23;LRP1	SH3TC2;CCND1;MAF;DUSP4;BCL2L1;LAMC2;RND3;KCNK3;C17orf108;EPS8L2;RNF144B;SLC31A2;ARID4A;SYNPO;MAG;KLHDC7A;NCKAP5L;TAGLN;CDKN1A;GRIK5;ALOXE3;FGD3;PRKX;PCNXL2;MDM2;C16orf45;PVRL4;FAM49A;PRICKLE2;BTG1;SYBU;PRINS;ATP10D;HTR2C;ITGA3;LHFPL2;CAPN1;NTN4;SHC4;RAB5B;NUAK1;DKK1;BRWD3;KANK3;MED23;LRP1;EFCAB10;ZNF323;UGT1A6;MYPN;KIAA0247;MAP2;KLF4;EDN1;CAT;PTPRE;IQSEC2;CLIP4;UCA1;GCNT2;PTAFR;IGFBP5;MYO16;SEPT9…	11;12;15;21;26;27;82;84;86;89;97;106;123;128;147;150;164;165;184;248;297;299;316;335;405;408;416;423;425;452;455;466;478;488;520;526;546;550;566;570;576;595;609;617;640;655;687;793;799;806;811;885;902;965;980;986;991;1028;1073;1112;1134;1139;1140;1147;1177;1189;1201;1207;1237;1251;1304;1363;1370;1374;1377;1405;1425;1435;1436;1440;1446;1460;1474;1513;1527;1530;1534;1575;1576;1586;1628;1645;1666;16…
RNAseq_upregulated_genes	45	yetfasco-2091	YIL056W	BATF,SPI1,FOS,BACH2,FOSB,JUNB,JUN,JUND,JDP2,ARNT,FOSL1,FOSL2	hg19-tss-centered-10kb-10species	0.0300913	3.50155	RGS20;BMP1;FOSL1;CDKN1A;KDM6B;FGF13;RHOC;KIAA0513;LRRC37A3;PROM2;NFATC2;KIAA1539;SERTAD1;SHC4;GRIK5;LAMC2;AHNAK2;SEPT9;LAMB3;ALS2CL;PCNXL2;EDN2;KRT16;PRSS22;CAPN2;POU2F3;GADD45A;TRAK1;SLC25A45;MAPRE3;COL7A1;KSR1;CLIP4;MYO1E;ATP10D;NAV2;MDM2;TMBIM1;CNFN;EFCAB10;LRP1;MAF;YPEL3;SLC7A8;MVP;CYP4F8;LOC284379;SSTR5;STAT6;KIAA1683;NUAK1;ZNF423;CSNK1G1;PTAFR;SMAD3;RAB40B;ITGA3;RBM20;DOCK1;RAB5B;RAB19;MBNL…	RGS20;BMP1;FOSL1;CDKN1A;KDM6B;FGF13;RHOC;KIAA0513;LRRC37A3;PROM2;NFATC2;KIAA1539;SERTAD1;SHC4;GRIK5;LAMC2;AHNAK2;SEPT9;LAMB3;ALS2CL;PCNXL2;EDN2;KRT16;PRSS22;CAPN2;POU2F3;GADD45A;TRAK1;SLC25A45;MAPRE3;COL7A1;KSR1;CLIP4;MYO1E;ATP10D;NAV2;MDM2;TMBIM1;CNFN;EFCAB10;LRP1;MAF;YPEL3;SLC7A8;MVP;CYP4F8;LOC284379;SSTR5;STAT6;KIAA1683;NUAK1;ZNF423;CSNK1G1;PTAFR;SMAD3;RAB40B;ITGA3;RBM20;DOCK1;RAB5B;RAB19;MBNL…	2;27;33;36;54;63;73;82;89;107;121;123;124;126;137;144;215;221;230;260;297;300;306;324;341;345;369;418;424;440;454;470;472;481;487;540;569;573;585;587;588;597;601;621;625;640;644;674;730;766;791;807;876;882;902;908;917;947;958;966;993;1015;1023;1041;1065;1066;1080;1093;1146;1158;1188;1206;1209;1239;1245;1267;1283;1297;1318;1321;1340;1346;1356;1364;1368;1376;1391;1400;1410;1454;1501;1526;1559;1562;…
RNAseq_upregulated_genes	46	wgEncodeHaibTfbsEcc1Nficsc81335V0422111PkRep2.broadPeak.gz	NFIC_(SC-81335)/ECC-1/None	NFIC	hg19-tss-centered-10kb-chip-encode-taipale-inhouse	0.0537016	3.47514	LAMB3;HES2;KRT80;ABCC3;LIF;MYEOV;ARHGEF37;BCL2L1;KCNK15;HES1;NT5E;CDKN1A;SLC25A45;DDIT4;PYROXD2;KLHDC7A;AFAP1L2;SEPT9;PIK3R3;LOC643596;ITGB6;LOXL4;TSPAN1;FMN1;EDN2;AHNAK2;NAV2;TNS4;PIK3R2;NEDD9;RHOC;ALDH3A1;PNRC1;DUSP6;CELSR2;FGF18;RNF19A;KLF9;ANK1;SYNPO;RAB26;FAM65C;B4GALT1;PADI3;C1QTNF6;SILV;MKNK2;NTSR1;UBASH3B;COL16A1;ITGA3;MFGE8;SPTBN5;PLD1;MDM2;RAB37;TM7SF2;GADD45G;EPS8L2;FAS;ACTA2;LIPH;ZNF3…	LAMB3;HES2;KRT80;ABCC3;LIF;MYEOV;ARHGEF37;BCL2L1;KCNK15;HES1;NT5E;CDKN1A;SLC25A45;DDIT4;PYROXD2;KLHDC7A;AFAP1L2;SEPT9;PIK3R3;LOC643596;ITGB6;LOXL4;TSPAN1;FMN1;EDN2;AHNAK2;NAV2;TNS4;PIK3R2;NEDD9;RHOC;ALDH3A1;PNRC1;DUSP6;CELSR2;FGF18;RNF19A;KLF9;ANK1;SYNPO;RAB26;FAM65C;B4GALT1;PADI3;C1QTNF6;SILV;MKNK2;NTSR1;UBASH3B;COL16A1;ITGA3;MFGE8;SPTBN5;PLD1;MDM2;RAB37;TM7SF2;GADD45G;EPS8L2;FAS;ACTA2;LIPH;ZNF3…	1;17;19;25;32;37;45;46;49;53;56;62;63;69;78;82;91;100;112;116;123;127;144;159;160;162;168;169;174;177;194;196;210;211;212;228;237;254;261;274;297;300;321;331;349;354;365;368;378;380;387;391;401;405;423;426;431;459;477;479;480;489;515;520;534;536;541;561;619;627;656;679;688;697;708;719;726;730;735;745;772;773;798;817;862;869;890;900;909;929;1034;1036;1075;1104;1114;1117;1118;1128;1159;1160;1189;12…
RNAseq_upregulated_genes	47	encode-UW.Motif.0089	UW.Motif.0089		hg19-tss-centered-10kb-10species	0.0299178	3.4574	TGFBI;EDN2;ABCC3;FOXI1;SPNS2;ARNTL;SH3TC2;SOX9;STAT6;FBLIM1;CDKN1A;RAB5B;LTBP2;THSD4;LMCD1;DUSP6;PBLD;ZNF423;FXYD3;KANK3;MAF;SNCAIP;SHC4;CAMK2B;ZNF219;PREX1;RASSF2;SEPT9;SASH1;AFAP1L2;GRIK5;BMP1;LRRC15;C1orf183;ATP10D;KSR1;KRT19;CMBL;DIXDC1;KCNF1;SLC43A2;FGF13;EFCAB10;PRKX;USP2;SYNPO	TGFBI;EDN2;ABCC3;FOXI1;SPNS2;ARNTL;SH3TC2;SOX9;STAT6;FBLIM1;CDKN1A;RAB5B;LTBP2;THSD4;LMCD1;DUSP6;PBLD;ZNF423;FXYD3;KANK3;MAF;SNCAIP;SHC4;CAMK2B;ZNF219;PREX1;RASSF2;SEPT9;SASH1;AFAP1L2;GRIK5;BMP1;LRRC15;C1orf183;ATP10D;KSR1;KRT19;CMBL;DIXDC1;KCNF1;SLC43A2;FGF13;EFCAB10;PRKX;USP2;SYNPO;SYBU;FIBCD1;NDRG4;MBNL2;SMOX;MDM2;STEAP3;MXD4;SSTR5;AFF3;TRIM29;MACC1;TMEM229B;KCNK3;RNF144B;CYFIP2;BCL6;NHLH2;RIN…	16;24;61;63;68;74;115;118;137;169;176;177;179;207;210;234;236;260;262;278;286;290;301;321;336;358;370;379;392;404;423;458;460;464;488;500;504;514;535;542;550;557;567;568;585;602;648;662;671;679;780;792;796;805;813;956;981;987;1004;1012;1015;1017;1019;1042;1091;1164;1171;1193;1196;1210;1212;1229;1261;1321;1327;1393;1422;1448;1471;1478;1540;1586;1627;1695;1719;1756;1793;1801;1813;1848;1849;1887;192…
RNAseq_upregulated_genes	48	yetfasco-2169	YJL089W	GATA2,GATA1	hg19-tss-centered-10kb-10species	0.0298972	3.45218	SYNPO;CDKN1A;RASSF2;FBLIM1;STEAP3;TMBIM1;SEPT9;PTAFR;MXD4;CUEDC1;PSD4;SSTR5;SMAD3;SPNS2;TMEM229B;SLC7A8;C1orf183;SERPINA1;ZNF423;LIF;EDN2;LRRC15;SULF2;SMOX;TSPAN1;KIAA1539;ALS2CL;DNAH1;C16orf5;FAM65C;CAPG;SLC25A42;KANK3;KSR1;USP2;BIK;PAQR7;ABAT;KCNK3;LTBP2;GSN;NR2E3;SPOCK2;ITGA3;TMEM40;POU2F3;SYT8;FGF18;UBASH3B;SHC4;MVP;LOC643008;SOX9;LDB3;TRIM29;ABCC3;C14orf159;GPRC5A;MDM2;SLC43A2;LRP1;GRN;PVALB…	SYNPO;CDKN1A;RASSF2;FBLIM1;STEAP3;TMBIM1;SEPT9;PTAFR;MXD4;CUEDC1;PSD4;SSTR5;SMAD3;SPNS2;TMEM229B;SLC7A8;C1orf183;SERPINA1;ZNF423;LIF;EDN2;LRRC15;SULF2;SMOX;TSPAN1;KIAA1539;ALS2CL;DNAH1;C16orf5;FAM65C;CAPG;SLC25A42;KANK3;KSR1;USP2;BIK;PAQR7;ABAT;KCNK3;LTBP2;GSN;NR2E3;SPOCK2;ITGA3;TMEM40;POU2F3;SYT8;FGF18;UBASH3B;SHC4;MVP;LOC643008;SOX9;LDB3;TRIM29;ABCC3;C14orf159;GPRC5A;MDM2;SLC43A2;LRP1;GRN;PVALB…	5;34;66;67;81;142;150;158;160;163;169;172;186;206;215;238;255;283;288;308;309;311;323;370;379;388;389;391;394;402;407;409;453;462;465;487;490;502;509;521;525;564;569;577;583;590;608;613;614;618;620;641;660;683;688;730;763;781;789;826;841;879;883;884;892;894;898;906;911;930;951;956;966;991;1007;1028;1031;1039;1044;1047;1097;1119;1121;1128;1154;1163;1169;1176;1205;1214;1225;1243;1259;1280;1348;1435…
RNAseq_upregulated_genes	49	homer-M00002	AP-1(bZIP)/ThioMac-PU.1-ChIP-Seq/Homer	BATF,NFATC1,FOSB,JUNB,JUND,MAFK,MAFB,MAFF,MAFG,SPI1,NFE2L3,NFE2L2,NFE2L1,JUN,FOSL1,NFE2,FOSL2,SRF,FOS,MAF,ARNT,JDP2,BACH2,BACH1	hg19-tss-centered-10kb-10species	0.029858	3.44221	RGS20;KDM6B;KIAA0513;CDKN1A;FGF13;LAMC2;BMP1;COL7A1;LRRC37A3;PRSS22;CAPN2;KIAA1539;MYO1E;SHC4;SLC7A8;LMCD1;KRT16;FHL2;EDN2;SERTAD1;PROM2;ZNF323;AHNAK2;LAMB3;RHOC;LTBP2;NFATC2;OCIAD2;ANK1;GPR87;SSTR5;EFCAB10;POU2F3;ABCC2;SEPT9;ITGA3;PCNXL2;KIAA1217;MAPRE3;ATP10D;RHOQ;GADD45A;MAP2;CLU;TMEM40;FEZ1;KSR1;RAB5B;GPRC5A;MTRNR2L6;TMBIM1;MDM2;PCLO;SULT1A1;RASAL1;CNFN;NAV2;YPEL3;MBNL2;TRAK1;ZNF219;SLC25A45;…	RGS20;KDM6B;KIAA0513;CDKN1A;FGF13;LAMC2;BMP1;COL7A1;LRRC37A3;PRSS22;CAPN2;KIAA1539;MYO1E;SHC4;SLC7A8;LMCD1;KRT16;FHL2;EDN2;SERTAD1;PROM2;ZNF323;AHNAK2;LAMB3;RHOC;LTBP2;NFATC2;OCIAD2;ANK1;GPR87;SSTR5;EFCAB10;POU2F3;ABCC2;SEPT9;ITGA3;PCNXL2;KIAA1217;MAPRE3;ATP10D;RHOQ;GADD45A;MAP2;CLU;TMEM40;FEZ1;KSR1;RAB5B;GPRC5A;MTRNR2L6;TMBIM1;MDM2;PCLO;SULT1A1;RASAL1;CNFN;NAV2;YPEL3;MBNL2;TRAK1;ZNF219;SLC25A45;…	3;4;38;47;48;55;82;119;131;144;155;158;162;168;169;222;228;231;243;251;254;271;285;298;300;325;362;378;398;403;404;455;456;489;492;517;540;543;558;579;616;619;622;658;714;740;743;765;783;820;823;830;846;847;860;869;889;904;909;910;917;918;925;962;965;1017;1043;1067;1088;1131;1137;1161;1169;1174;1176;1221;1236;1300;1316;1325;1340;1350;1355;1371;1404;1438;1452;1513;1568;1627;1628;1688;1718;1723;172…
RNAseq_upregulated_genes	50	taipale-RACATGTYNNRACATGTC-TP63-DBD	RACATGTYNNRACATGTC-TP63-DBD	TP63,TP53	hg19-tss-centered-10kb-10species	0.0298301	3.43509	CDKN1A;SPATA18;ZMAT3;GPR87;MDM2;APOD;RPS27L;BBC3;HSPA4L;EDA2R;CYP4F8;MTRNR2L6;ABCA12;EFCAB10;LIMK2;SERPINB5;C7orf60;SYBU;CPEB4;PHLDA3;KIAA1210;DQX1;POU2F3;LRP1;FILIP1L;CSNK1G1;CLDN1;GADD45A;BCL6;LOC284440;YPEL5;OCIAD2;BLNK;MBNL2;TGFBI;PDK4;SHC4;NTN4;PDE4C;CAPN8;CCNG1;CALD1;FGF13;KCNK3;LHFPL2;PLCL2;FSTL4;FAM49A;RRM2B;C5orf4;NFATC2;KIAA1257;KIAA1217	CDKN1A;SPATA18;ZMAT3;GPR87;MDM2;APOD;RPS27L;BBC3;HSPA4L;EDA2R;CYP4F8;MTRNR2L6;ABCA12;EFCAB10;LIMK2;SERPINB5;C7orf60;SYBU;CPEB4;PHLDA3;KIAA1210;DQX1;POU2F3;LRP1;FILIP1L;CSNK1G1;CLDN1;GADD45A;BCL6;LOC284440;YPEL5;OCIAD2;BLNK;MBNL2;TGFBI;PDK4;SHC4;NTN4;PDE4C;CAPN8;CCNG1;CALD1;FGF13;KCNK3;LHFPL2;PLCL2;FSTL4;FAM49A;RRM2B;C5orf4;NFATC2;KIAA1257;KIAA1217;TMEM99;FAS;KIAA1370;FAM198B;ZNF323;CITED2;C16orf5…	1;7;8;19;21;27;31;47;69;74;112;154;166;173;178;195;221;231;282;299;305;307;331;357;362;371;376;377;380;410;423;430;498;522;535;542;558;559;572;582;584;596;602;614;657;670;681;699;705;721;744;759;769;804;855;915;956;1018;1024;1056;1061;1062;1078;1089;1135;1146;1147;1166;1172;1178;1184;1190;1232;1273;1280;1313;1330;1343;1385;1406;1417;1422;1439;1468;1491;1512;1521;1538;1560;1580;1589;1593;1653;1672…
RNAseq_upregulated_genes	51	homer-M00140	p53(p53)/Saos-p53-ChIP-Seq/Homer	TP63,TP53,TFCP2L1,TP73	hg19-tss-centered-10kb-10species	0.0297088	3.40424	CDKN1A;RAP2B;MDM2;ZMAT3;GPR173;CYP4F8;ZNF323;DDIT4;CSNK1G1;ARNTL;CPEB4;USP2;MXD4;RAB40B;FAM189A2;TGFB2;CALD1;CCNG1;KANK3;GPR87;SLC12A4;ADCK3;FOS;SMOX;ABCA12;CLCA2;COL16A1;COL17A1;RAB5B;SSTR5;EFCAB10;MAF;CAPN1;NTN4;NEAT1;L3MBTL1;ALDH3A1;LHFPL2;MKNK2;CYFIP2;PDE4C;HSPA4L;LRRC37A3;LMO7;BBC3;SYT8;STEAP3;FAM155A;FHL2;LOC402778;SESN3;LOC100130238;SEPT9;PHLDA3;NAV2;ALDH4A1;TMEM45B;TMEM229B;SPRY1;TRIM22;C…	CDKN1A;RAP2B;MDM2;ZMAT3;GPR173;CYP4F8;ZNF323;DDIT4;CSNK1G1;ARNTL;CPEB4;USP2;MXD4;RAB40B;FAM189A2;TGFB2;CALD1;CCNG1;KANK3;GPR87;SLC12A4;ADCK3;FOS;SMOX;ABCA12;CLCA2;COL16A1;COL17A1;RAB5B;SSTR5;EFCAB10;MAF;CAPN1;NTN4;NEAT1;L3MBTL1;ALDH3A1;LHFPL2;MKNK2;CYFIP2;PDE4C;HSPA4L;LRRC37A3;LMO7;BBC3;SYT8;STEAP3;FAM155A;FHL2;LOC402778;SESN3;LOC100130238;SEPT9;PHLDA3;NAV2;ALDH4A1;TMEM45B;TMEM229B;SPRY1;TRIM22;C…	2;7;9;19;35;41;42;61;67;93;121;123;130;156;176;207;225;227;232;252;257;289;307;342;364;377;382;403;429;436;442;461;471;472;476;489;529;586;589;623;634;643;664;679;685;709;726;736;768;777;835;838;854;873;875;877;898;953;956;985;1005;1009;1012;1014;1017;1018;1021;1034;1036;1051;1066;1076;1083;1116;1119;1120;1143;1152;1185;1205;1210;1217;1229;1234;1262;1298;1315;1347;1416;1417;1427;1437;1451;1456;14…
RNAseq_upregulated_genes	52	homer-M01858	HAP4(MacIsaac)/Yeast	HOXC8,HOXB8,HOXD8,NFYC,NFYB,NFYA,POLE4	hg19-tss-centered-10kb-10species	0.029664	3.39285	ARID4A;MKNK2;CCNG1;RHOQ;ALDH4A1;SHC4;WDR81;RPS6KA2;SOX9;HIST1H2AI;C17orf91;CDKN1A;HIST2H2BE;SESN2;WBP1;SERTAD1;PDK4;CCNG2;ASB9;C20orf194;LPXN;CAT;PNRC1;SLC43A2;TXNIP;TMEM45B;PIK3R3;UCP2;KLF9;DUSP10;SARDH;HIST1H3A;MDM2;RAP2B;MAF;KDM6B;IQSEC2;SSTR5;FAM161B;SESN3;EPS8L1;MSX2;MXD4;C1QTNF6;HLA-F;NR2E3;HIST2H2BF;RFX5;FGD3;IVD;MAST4;KANK3;ATP10D;HTR2C;C12orf5;LRRC37A3;ZNF323;FGF13;C5orf41;USP2;KIAA1539;…	ARID4A;MKNK2;CCNG1;RHOQ;ALDH4A1;SHC4;WDR81;RPS6KA2;SOX9;HIST1H2AI;C17orf91;CDKN1A;HIST2H2BE;SESN2;WBP1;SERTAD1;PDK4;CCNG2;ASB9;C20orf194;LPXN;CAT;PNRC1;SLC43A2;TXNIP;TMEM45B;PIK3R3;UCP2;KLF9;DUSP10;SARDH;HIST1H3A;MDM2;RAP2B;MAF;KDM6B;IQSEC2;SSTR5;FAM161B;SESN3;EPS8L1;MSX2;MXD4;C1QTNF6;HLA-F;NR2E3;HIST2H2BF;RFX5;FGD3;IVD;MAST4;KANK3;ATP10D;HTR2C;C12orf5;LRRC37A3;ZNF323;FGF13;C5orf41;USP2;KIAA1539;…	5;29;39;40;54;80;82;93;129;134;149;157;162;165;174;185;188;205;227;245;256;262;304;306;327;360;381;398;416;426;428;435;437;472;474;513;540;575;586;594;600;612;715;725;747;752;763;766;807;826;853;854;885;891;913;934;945;947;1019;1027;1037;1039;1065;1075;1098;1108;1132;1137;1158;1165;1174;1208;1247;1249;1287;1291;1319;1320;1365;1387;1388;1397;1398;1402;1435;1474;1490;1520;1611;1645;1652;1665;1668;1…
RNAseq_upregulated_genes	53	tfdimers-MD00067	Helios	A_LRF	hg19-tss-centered-10kb-10species	0.0296621	3.39237	SYT8;BCL2L1;GCNT4;MAG;CDKN1A;LOXL4;LIF;CAPN1;ALDH3A1;SSTR5;GOLGA7B;SOX9;KSR1;SPNS2;COL11A2;GSN;CATSPERG;PTK7;LTBP2;KDM4B;FXYD3;FAM65C;NR2E3;LHFPL2;SEPT9;GRIK5;SSPO;KDM4A;ZNF219;CDKL5;FAM155A;SMOX;SNCAIP;MYL5;ARHGDIB;NTSR1;EFCAB10;SARDH	SYT8;BCL2L1;GCNT4;MAG;CDKN1A;LOXL4;LIF;CAPN1;ALDH3A1;SSTR5;GOLGA7B;SOX9;KSR1;SPNS2;COL11A2;GSN;CATSPERG;PTK7;LTBP2;KDM4B;FXYD3;FAM65C;NR2E3;LHFPL2;SEPT9;GRIK5;SSPO;KDM4A;ZNF219;CDKL5;FAM155A;SMOX;SNCAIP;MYL5;ARHGDIB;NTSR1;EFCAB10;SARDH;MFSD4;PCDHA10;MXD4;PRKX;HES1;EPS8L2;C13orf18;TMEM125;COL16A1;USP2;AFF3;RASSF2;PLA2G3;GRN;TRIM29;CECR1;PGLYRP2;BIK;FEZ1;SLC31A2;PDE4C;MDM2;NFATC2;CAMK1D;LAMB3;ABAT;…	16;29;31;33;37;53;64;69;103;107;169;178;219;220;223;249;259;294;299;305;308;325;326;330;336;337;339;343;358;367;384;414;420;431;486;489;493;506;537;576;583;604;666;678;689;703;740;807;821;836;910;927;993;1000;1011;1022;1051;1114;1115;1126;1133;1171;1175;1177;1210;1226;1260;1288;1353;1388;1413;1457;1504;1568;1587;1613;1623;1650;1677;1722;1742;1756;1802;1816;1841;1868;1883;1899;1921;1924;1933;1938;…
RNAseq_upregulated_genes	54	yetfasco-1966	YNL216W		hg19-tss-centered-10kb-10species	0.0296546	3.39047	CDKN1A;GPR173;CELSR2;SHC4;ADCK3;CCR7;BCL6;PTAFR;FILIP1L;PCNXL2;BBC3;EFCAB10;LAMC2;MAST4;ARHGDIB;MYO1B;SLC43A2;RRM2B;BTBD11;SYTL2;SMAD3;PPP1R3B;NYNRIN;PVRL4;KIAA1217;MFSD4;SLC7A8;CYFIP2;C17orf108;ARNTL;WISP2;ZMAT3;GHR;MAPRE3;C12orf5;ST3GAL5;KDM6B;PSD4;SYNPO;NAV2;SNAI2;PBLD;RAB37;TRIM29;CCDC159;GLS2;HES1;KCNK3;USP2;ANTXR1;TMEM229B;FXYD3;TMEM86A;GPR87;COL16A1;CDKL5;PLCL2;IQSEC2;TMEM117;INPP1;C1orf18…	CDKN1A;GPR173;CELSR2;SHC4;ADCK3;CCR7;BCL6;PTAFR;FILIP1L;PCNXL2;BBC3;EFCAB10;LAMC2;MAST4;ARHGDIB;MYO1B;SLC43A2;RRM2B;BTBD11;SYTL2;SMAD3;PPP1R3B;NYNRIN;PVRL4;KIAA1217;MFSD4;SLC7A8;CYFIP2;C17orf108;ARNTL;WISP2;ZMAT3;GHR;MAPRE3;C12orf5;ST3GAL5;KDM6B;PSD4;SYNPO;NAV2;SNAI2;PBLD;RAB37;TRIM29;CCDC159;GLS2;HES1;KCNK3;USP2;ANTXR1;TMEM229B;FXYD3;TMEM86A;GPR87;COL16A1;CDKL5;PLCL2;IQSEC2;TMEM117;INPP1;C1orf18…	28;61;64;82;89;100;117;118;132;145;149;167;184;193;204;229;253;256;287;292;300;337;345;358;364;369;372;375;380;389;402;407;418;425;445;453;469;492;511;533;546;595;597;605;633;659;687;704;728;780;812;842;860;865;890;898;1000;1013;1043;1045;1060;1102;1106;1116;1131;1179;1207;1210;1212;1227;1254;1262;1287;1309;1317;1330;1337;1357;1376;1377;1380;1416;1447;1481;1491;1530;1531;1537;1540;1550;1591;1596;…
RNAseq_upregulated_genes	55	swissregulon-NFE2.p2	NFE2	BATF,MAFB,SPI1,BACH2,FOS,NFE2L3,NFE2L2,BACH1,JUNB,JUN,JUND,MAFK,FOSL1,NFE2,FOSL2,MAFA,FOSB,MAF,NFE2L1,MAFF,MAFG	hg19-tss-centered-10kb-10species	0.0296098	3.37908	FGF13;PROM2;RGS20;GADD45A;CDKN1A;PCLO;CLU;RHOC;LRRC37A3;CLIP4;GADD45G;SHC4;NFATC2;BBC3;GABARAPL1;KIAA0513;TMEM40;FOSL1;SLC7A8;SSTR5;AHNAK2;PRSS22;CAPN2;MVP;RASAL1;PVRL4;TMBIM1;SMAD3;SAMD12;PVALB;MAP2;USP2;ITGA3;YPEL5;EFCAB10;C11orf52;ALS2CL;BMP1;IDUA;DOCK3;KRT16;SULT1A1;EPS8L2;ZNF219;ARHGDIB;FEZ1;BCL10;SEPT9;HSPB8;GRIK5;SLC25A45;ATP10D;NECAB2;SPOCK2;SERPINB5;FAM49A;RAB5B;LOC284379;COL7A1;LHFPL2;A…	FGF13;PROM2;RGS20;GADD45A;CDKN1A;PCLO;CLU;RHOC;LRRC37A3;CLIP4;GADD45G;SHC4;NFATC2;BBC3;GABARAPL1;KIAA0513;TMEM40;FOSL1;SLC7A8;SSTR5;AHNAK2;PRSS22;CAPN2;MVP;RASAL1;PVRL4;TMBIM1;SMAD3;SAMD12;PVALB;MAP2;USP2;ITGA3;YPEL5;EFCAB10;C11orf52;ALS2CL;BMP1;IDUA;DOCK3;KRT16;SULT1A1;EPS8L2;ZNF219;ARHGDIB;FEZ1;BCL10;SEPT9;HSPB8;GRIK5;SLC25A45;ATP10D;NECAB2;SPOCK2;SERPINB5;FAM49A;RAB5B;LOC284379;COL7A1;LHFPL2;A…	17;35;52;62;77;85;123;127;134;166;175;187;196;207;216;231;245;256;283;292;305;306;324;325;327;343;346;374;401;416;419;425;435;456;484;486;519;530;542;544;550;578;581;586;607;620;628;698;747;766;768;795;798;801;839;861;878;887;890;897;902;905;919;923;944;961;1040;1089;1091;1107;1146;1150;1160;1170;1175;1178;1203;1253;1254;1268;1301;1309;1337;1343;1437;1466;1472;1475;1485;1492;1501;1509;1514;1560;1…
RNAseq_upregulated_genes	56	homer-M00084	HIF1b(HLH)/O785-HIF1b-ChIP-Seq(GSE34871)/Homer	BATF,JUNB,FOS,BACH2,FOSB,ARNT,JUN,JUND,JDP2,SPI1,FOSL1,FOSL2,NFATC1	hg19-tss-centered-10kb-10species	0.0296005	3.37671	RGS20;KDM6B;FGF13;LAMC2;KIAA0513;CDKN1A;FHL2;BMP1;PRSS22;SLC7A8;OCIAD2;GPR87;LMCD1;COL7A1;MYO1E;CAPN2;LAMB3;SERTAD1;SSTR5;KIAA1539;LRRC37A3;BBC3;SHC4;ALOXE3;RHOQ;NFATC2;MTRNR2L6;ITGA3;CLU;LIF;AHNAK2;KRT16;RNF144B;ABCC2;EDN2;POU2F3;ZNF323;RAB5B;PCLO;YPEL3;LTBP2;EFCAB10;GADD45A;PROM2;CAPN1;ANK1;GPRC5A;ATP10D;FEZ1;MDM2;ZNF423;AQP3;LRRC15;COL17A1;RHOC;FAM189A2;KCNK3;PSCA;SYT8;GPR115;NTSR1;NAV2;MYO16;…	RGS20;KDM6B;FGF13;LAMC2;KIAA0513;CDKN1A;FHL2;BMP1;PRSS22;SLC7A8;OCIAD2;GPR87;LMCD1;COL7A1;MYO1E;CAPN2;LAMB3;SERTAD1;SSTR5;KIAA1539;LRRC37A3;BBC3;SHC4;ALOXE3;RHOQ;NFATC2;MTRNR2L6;ITGA3;CLU;LIF;AHNAK2;KRT16;RNF144B;ABCC2;EDN2;POU2F3;ZNF323;RAB5B;PCLO;YPEL3;LTBP2;EFCAB10;GADD45A;PROM2;CAPN1;ANK1;GPRC5A;ATP10D;FEZ1;MDM2;ZNF423;AQP3;LRRC15;COL17A1;RHOC;FAM189A2;KCNK3;PSCA;SYT8;GPR115;NTSR1;NAV2;MYO16;…	1;4;14;19;44;51;57;89;98;110;115;120;131;145;160;174;176;181;234;250;278;290;313;352;355;363;394;398;411;418;442;444;460;480;512;554;596;603;608;626;628;639;647;650;661;663;680;712;717;752;762;770;771;775;783;824;875;894;897;900;923;960;976;981;990;1002;1004;1060;1105;1109;1145;1152;1162;1183;1194;1199;1214;1238;1245;1257;1266;1289;1296;1301;1331;1332;1334;1358;1371;1377;1405;1457;1461;1470;1579;…
RNAseq_upregulated_genes	57	yetfasco-479	YNL068C	FOXO3,FOXK1,FOXD1,FOXA1,FOXO1,FOXA2,FOXF2,FOXO4	hg19-tss-centered-10kb-10species	0.0295837	3.37244	NFATC2;AFF3;FAM49A;MTRNR2L2;PIK3IP1;YPEL2;MXD4;RIN2;BIK;ADCK3;AHNAK2;MTRNR2L6;LOC100129716;ABCC3;MXD1;ZFYVE1;FOS;SPOCK2;PNRC1;ARNTL;FGF13;CITED2;BBC3;SLC12A6;MBNL2;TRAK1;EFCAB10;CYGB;SSTR5;LMBR1L;PPM1D;ATP10D;DUSP10;BTG1;YPEL3;FAM189A2;CDKN1A;TXNIP;NEDD9;KLHL24;NAV2;FAM155A;FHL2;CAPN1;MAST4;RGS20;CALD1;RBL2;MYO1E;LRP1;PLAU;DIXDC1;TP53INP1;COL17A1;LHFPL2;RNF39;TCP11L2;RAB40B;DUSP4;TGFBI;NYNRIN;FLJ…	NFATC2;AFF3;FAM49A;MTRNR2L2;PIK3IP1;YPEL2;MXD4;RIN2;BIK;ADCK3;AHNAK2;MTRNR2L6;LOC100129716;ABCC3;MXD1;ZFYVE1;FOS;SPOCK2;PNRC1;ARNTL;FGF13;CITED2;BBC3;SLC12A6;MBNL2;TRAK1;EFCAB10;CYGB;SSTR5;LMBR1L;PPM1D;ATP10D;DUSP10;BTG1;YPEL3;FAM189A2;CDKN1A;TXNIP;NEDD9;KLHL24;NAV2;FAM155A;FHL2;CAPN1;MAST4;RGS20;CALD1;RBL2;MYO1E;LRP1;PLAU;DIXDC1;TP53INP1;COL17A1;LHFPL2;RNF39;TCP11L2;RAB40B;DUSP4;TGFBI;NYNRIN;FLJ…	17;26;41;48;58;59;95;98;119;132;149;154;161;174;185;208;214;225;230;235;262;276;307;326;336;343;371;374;376;397;449;454;456;462;484;492;517;522;539;605;641;685;691;758;761;775;790;796;817;848;855;885;899;955;966;1001;1027;1035;1036;1045;1046;1080;1092;1120;1125;1127;1136;1172;1198;1223;1247;1259;1293;1302;1358;1364;1389;1393;1402;1410;1411;1427;1435;1437;1447;1463;1492;1512;1513;1518;1556;1572;15…
RNAseq_upregulated_genes	58	wgEncodeHaibTfbsEcc1Nficsc81335V0422111PkRep1.broadPeak.gz	NFIC_(SC-81335)/ECC-1/None	NFIC	hg19-tss-centered-10kb-chip-encode-taipale-inhouse	0.0526491	3.36629	HES1;NT5E;KLHDC7A;MYEOV;KCNK15;AFAP1L2;BCL2L1;HES2;SLC25A45;LAMB3;LIF;ARHGEF37;KRT80;TSPAN1;ITGB6;ABCC3;SPTBN5;LIPH;NAV2;LOXL4;NEDD9;FMN1;SEPT9;B4GALT1;PYROXD2;UBASH3B;ALDH3A1;ANK1;PRINS;PNRC1;TNS4;DDIT4;PIK3R3;MFGE8;WISP2;COL17A1;FGF18;ANK3;RHOC;EDN2;PIK3R2;SYNPO;PADI3;DUSP6;MDM2;AHNAK2;FILIP1L;CDKN1A;ACTA2;ZNF323;KIAA1683;IGFBP5;RAB26;PPM1D;NLRX1;GCNT2;RFX5;CELSR2;PSCA;RAB37;C1QTNF6;CUEDC1;LOC6…	HES1;NT5E;KLHDC7A;MYEOV;KCNK15;AFAP1L2;BCL2L1;HES2;SLC25A45;LAMB3;LIF;ARHGEF37;KRT80;TSPAN1;ITGB6;ABCC3;SPTBN5;LIPH;NAV2;LOXL4;NEDD9;FMN1;SEPT9;B4GALT1;PYROXD2;UBASH3B;ALDH3A1;ANK1;PRINS;PNRC1;TNS4;DDIT4;PIK3R3;MFGE8;WISP2;COL17A1;FGF18;ANK3;RHOC;EDN2;PIK3R2;SYNPO;PADI3;DUSP6;MDM2;AHNAK2;FILIP1L;CDKN1A;ACTA2;ZNF323;KIAA1683;IGFBP5;RAB26;PPM1D;NLRX1;GCNT2;RFX5;CELSR2;PSCA;RAB37;C1QTNF6;CUEDC1;LOC6…	1;5;8;9;21;32;38;41;48;53;60;68;71;72;77;79;87;88;90;93;102;116;127;139;149;173;186;196;205;207;209;226;240;254;257;268;270;283;287;294;297;309;335;356;362;387;389;393;404;424;431;465;468;469;472;474;476;481;484;502;506;509;518;519;526;532;544;545;561;572;602;605;609;640;646;666;678;696;714;715;729;730;735;738;758;761;767;793;815;829;841;860;864;893;904;928;949;963;967;973;978;980;989;995;1028;10…
RNAseq_upregulated_genes	59	wgEncodeSydhTfbsImr90Rfx5IggrabPk.narrowPeak.gz	RFX5_(200-401-194)/IMR90/None	RFX5	hg19-tss-centered-10kb-chip-encode-taipale-inhouse	0.0524923	3.35008	HLA-F;MKNK2;BTN2A2;TAP1;HLA-DMA;MXD4;RAB4B;TPP1;CNTD2;CCND1;HLA-DQB1;FLJ26850;RFX5;MXD1;NXNL2;NCKAP5L;DYRK1B;MR1;WDR81;C17orf91;HLA-DRB5;PDCD4;LOC282997;KDM4A;UBE2H;HLA-DRB1;TUBA1A;TSPYL2;SESN3;GRIK5;CCNG2;DDB2;YPEL2;RAB40B;PIK3R2;C20orf194;LOC100129716;ZNF490;PNRC1;BBC3;DDIT4;MALAT1;KLF9;PIK3IP1;TP53INP1;IL1RN;PIK3R3;GADD45G;RHOQ	HLA-F;MKNK2;BTN2A2;TAP1;HLA-DMA;MXD4;RAB4B;TPP1;CNTD2;CCND1;HLA-DQB1;FLJ26850;RFX5;MXD1;NXNL2;NCKAP5L;DYRK1B;MR1;WDR81;C17orf91;HLA-DRB5;PDCD4;LOC282997;KDM4A;UBE2H;HLA-DRB1;TUBA1A;TSPYL2;SESN3;GRIK5;CCNG2;DDB2;YPEL2;RAB40B;PIK3R2;C20orf194;LOC100129716;ZNF490;PNRC1;BBC3;DDIT4;MALAT1;KLF9;PIK3IP1;TP53INP1;IL1RN;PIK3R3;GADD45G;RHOQ;SEPT9;ODZ4;SYTL2;MGC23284;SUOX;TMBIM1;MSX2;EML2;CAMK2B;RIBC1;KIAA1…	8;20;21;24;27;30;44;51;69;78;81;85;90;93;95;109;115;119;124;125;150;155;157;170;173;176;177;179;181;187;190;199;205;216;221;222;226;248;249;251;269;272;298;300;308;312;313;333;335;360;367;376;389;428;429;466;482;502;525;528;533;544;545;547;555;562;609;646;648;650;673;679;698;713;740;745;761;791;802;837;854;860;907;915;1016;1036;1052;1085;1093;1114;1120;1131;1224;1251;1260;1279;1303;1309;1329;1375…
RNAseq_upregulated_genes	60	yetfasco-1773	YIL131C	FOXO3,FOXP1,FOXK1,FOXJ3,FOXJ1,FOXG1,FOXA1,FOXO1,FOXA2,FOXF2,FOXO4	hg19-tss-centered-10kb-10species	0.0294886	3.34823	YPEL2;LOC100129716;FRMPD2;CDKN1A;BBC3;PIK3IP1;BTG1;ATP10D;CYGB;YPEL3;CITED2;TXNIP;EFCAB10;SLC12A6;CYP4F8;PPM1D;DDIT4;EOMES;KLF4;MBNL2;TSPAN1;LRRC37A3;MTRNR2L6;SPOCK2;C5orf41;LMBR1L;FAM189A2;TMEM86A;SYTL2;KANK3	YPEL2;LOC100129716;FRMPD2;CDKN1A;BBC3;PIK3IP1;BTG1;ATP10D;CYGB;YPEL3;CITED2;TXNIP;EFCAB10;SLC12A6;CYP4F8;PPM1D;DDIT4;EOMES;KLF4;MBNL2;TSPAN1;LRRC37A3;MTRNR2L6;SPOCK2;C5orf41;LMBR1L;FAM189A2;TMEM86A;SYTL2;KANK3;KHNYN;PDK4;ZFYVE1;RND3;NAV2;GPR173;MTRNR2L2;NEDD9;AFF3;SHC4;SSTR5;FHL2;GCNT4;TSC22D3;KLHL24;UCP2;RASSF2;ADCK3;C12orf5;KIAA1217;PLAU;EPAS1;MDM2;ARNTL;FOS;LHFPL2;DIXDC1;COL16A1;RAB5B;CAMK2B;B…	13;28;31;35;38;45;46;47;58;66;74;114;133;154;155;160;166;196;214;226;228;310;314;321;323;327;349;352;371;380;415;497;515;570;578;616;620;626;643;644;719;753;764;805;807;825;849;853;855;887;898;973;985;990;1041;1117;1137;1155;1160;1170;1171;1220;1284;1356;1367;1374;1430;1441;1508;1538;1578;1604;1607;1622;1638;1650;1680;1682;1695;1697;1711;1732;1739;1750;1785;1793;1823;1832;1835;1860;1883;1919;1928…
RNAseq_upregulated_genes	61	yetfasco-1536	YBL021C	NFYC,NFYB,NFYA,POLE3	hg19-tss-centered-10kb-10species	0.0294139	3.32924	HIST2H2BE;HIST1H2AI;ALDH4A1;PNRC1;HES1;MXD1;LPXN;RHOQ;DUSP10;RFX5;TXNIP;ADCK3;HIST1H2BC;PBXIP1;CDKN1A;CAT;MKNK2;RAP2B;SLC43A2;KIAA1539;WBP1;C1orf183;CCNG1;MXD4;ARRDC4;KDM6B;CDKL5;SHC4;HIST2H2BF;EML2;KLF9;SERTAD1;SSTR5;NR2E3;PIK3R3;C17orf91;WDR81;SESN2;ARID4A;AFF3;PDK4;TMEM45B;MGC23284;C5orf41;AEN;MAF;FGD3;HLA-DQB1;IQSEC2;SESN3;FGF13;ABAT;DUSP6	HIST2H2BE;HIST1H2AI;ALDH4A1;PNRC1;HES1;MXD1;LPXN;RHOQ;DUSP10;RFX5;TXNIP;ADCK3;HIST1H2BC;PBXIP1;CDKN1A;CAT;MKNK2;RAP2B;SLC43A2;KIAA1539;WBP1;C1orf183;CCNG1;MXD4;ARRDC4;KDM6B;CDKL5;SHC4;HIST2H2BF;EML2;KLF9;SERTAD1;SSTR5;NR2E3;PIK3R3;C17orf91;WDR81;SESN2;ARID4A;AFF3;PDK4;TMEM45B;MGC23284;C5orf41;AEN;MAF;FGD3;HLA-DQB1;IQSEC2;SESN3;FGF13;ABAT;DUSP6;TIMP3;USP2;CAPN1;FDXR;TP53INP1;SH3BGR;STAT6;GAD1;UCP2…	15;21;22;65;70;79;148;150;153;186;188;189;200;207;241;244;254;258;268;282;289;305;306;313;330;344;351;364;369;386;430;435;441;460;465;524;526;527;541;546;565;581;587;590;614;639;660;685;729;731;735;739;755;782;803;843;851;888;924;958;979;1014;1157;1162;1175;1185;1213;1235;1236;1253;1332;1340;1363;1377;1415;1428;1431;1465;1486;1517;1574;1623;1636;1646;1653;1665;1678;1696;1715;1716;1731;1746;1751;1…
RNAseq_upregulated_genes	62	jaspar-PB0017.1	Foxj3_1	FOXO3,FOXJ2,FOXJ3,FOXK1,FOXP3,FOXJ1,FOXL1,FOXO1,FOXD1,FOXA1,FOXA3,FOXA2,FOXP1,FOXF2,FOXO4,FOXG1,FOXC1	hg19-tss-centered-10kb-10species	0.0293673	3.31737	PPM1D;YPEL2;ZFHX2;BBC3;PLAU;BTG1;C5orf41;NAV2;SPOCK2;CDKN1A;DIXDC1;KLF4;EOMES;LMBR1L;DDIT4;HES1;FRMPD2;NUAK1;SEPT9;ADCK3;CITED2;UBASH3B;EFCAB10;ZFYVE1;PIK3IP1;ZNF323;CYGB;COL17A1;PLK3;ARHGAP42;NEDD9;SLC12A6;KLHL24;ARID4A;RIN2;RND3;LRRC37A3;MBNL2;KDM4A;SOX9	PPM1D;YPEL2;ZFHX2;BBC3;PLAU;BTG1;C5orf41;NAV2;SPOCK2;CDKN1A;DIXDC1;KLF4;EOMES;LMBR1L;DDIT4;HES1;FRMPD2;NUAK1;SEPT9;ADCK3;CITED2;UBASH3B;EFCAB10;ZFYVE1;PIK3IP1;ZNF323;CYGB;COL17A1;PLK3;ARHGAP42;NEDD9;SLC12A6;KLHL24;ARID4A;RIN2;RND3;LRRC37A3;MBNL2;KDM4A;SOX9;PRICKLE2;SYBU;TGFB2;GBP2;IQSEC2;C18orf1;TMEM86A;MAF;GALC;LRP10;CAPN1;AFF3;FGF13;SMAD3;CYP4F8;FOS;MTRNR2L6;BIK;RAP2B;C5orf4;LHFPL2;RAB5B;TP53IN…	7;8;18;24;71;72;77;78;103;118;125;126;139;194;203;209;216;245;247;281;283;299;348;350;351;354;356;371;387;399;405;436;443;497;537;548;554;560;569;572;592;631;732;788;789;806;808;829;831;880;901;916;934;942;956;979;991;1018;1032;1067;1093;1109;1110;1112;1147;1177;1180;1190;1242;1248;1303;1308;1309;1318;1381;1419;1452;1459;1461;1493;1521;1522;1552;1563;1595;1600;1615;1647;1686;1692;1702;1718;1765;1…
RNAseq_upregulated_genes	63	homer-M01479	FKH1/FKH1_YPD/53-FKH1,53-FKH2(Harbison)/Yeast	FOXJ3,SRF,FOXK1,FOXG1,FOXO3,FOXO1,FOXA2,FOXF2,FOXO4	hg19-tss-centered-10kb-10species	0.0293654	3.3169	YPEL2;PIK3IP1;ZFYVE1;CYGB;LOC100129716;BBC3;CITED2;SLC12A6;EOMES;CDKN1A;SPOCK2;LMBR1L;TXNIP;PPM1D;USP2;EFCAB10;KLHL24;YPEL3;BTG1;RND3;PLCL2;COL17A1;RIN2;NAV2	YPEL2;PIK3IP1;ZFYVE1;CYGB;LOC100129716;BBC3;CITED2;SLC12A6;EOMES;CDKN1A;SPOCK2;LMBR1L;TXNIP;PPM1D;USP2;EFCAB10;KLHL24;YPEL3;BTG1;RND3;PLCL2;COL17A1;RIN2;NAV2;DDIT4;FGF13;FRMPD2;TMEM86A;ATP10D;EPAS1;SOX9;SYTL2;MXD4;CAPN1;FAM198B;SSTR5;MBNL2;FAM49A;PDK4;GLUL;SLC25A45;FAM189A2;KANK3;MAF;GCNT2;ZNF323;MTRNR2L2;NFATC2;AHNAK2;SYBU;GATS;MTRNR2L6;KHNYN;ANK3;C5orf41;PCLO;LHFPL2;PBLD;PLAU;LRRC37A3;DUSP10;RB…	15;23;25;38;44;58;68;70;72;73;97;106;109;115;133;178;195;198;213;247;267;271;289;294;352;371;435;445;450;466;475;483;504;507;515;548;557;586;589;604;649;685;693;700;703;730;786;791;809;832;869;899;902;1015;1019;1024;1055;1103;1120;1148;1150;1159;1169;1178;1204;1233;1267;1271;1297;1305;1313;1319;1340;1362;1385;1454;1517;1522;1552;1563;1613;1641;1651;1661;1672;1677;1724;1735;1749;1754;1774;1786;179…
RNAseq_upregulated_genes	64	taipale-RGGTCANNNARRGGTCA-Rara-DBD	RGGTCANNNARRGGTCA-Rara-DBD	RARA,RXRA	hg19-tss-centered-10kb-10species	0.0293635	3.31643	NTN4;LHFPL2;BAX;DUSP4;SYBU;ALDH3A1;SERPINA1;SPRY1;OPHN1;CAMK2B;CDKL5;FXYD3;KIAA1217;MCC;ADAMTS9;RHCG;DIRC3;SYTL1;PCNXL2;ZFYVE1;KDM6B;CDKN1A;KLHL24;RGS20;SSTR5;PAPSS2;C1orf57;FSTL4;PMEPA1;PTAFR;FILIP1L;SMOX;THNSL2;GCNT2;KLF9;SERPINB8;C2orf18;CECR1;HLA-DRB5;ZNF563;NR2E3;SNX29;ABAT;NEDD9;PLEKHB1;HTR2C;PSTPIP2;SLC38A7;ERRFI1;RIN2;SRGAP3;HES1;DOCK1;NAV2;RASAL1;TSPAN1;FEZ1;OCIAD2;PLEKHG1;C7orf60;OLFM2;…	NTN4;LHFPL2;BAX;DUSP4;SYBU;ALDH3A1;SERPINA1;SPRY1;OPHN1;CAMK2B;CDKL5;FXYD3;KIAA1217;MCC;ADAMTS9;RHCG;DIRC3;SYTL1;PCNXL2;ZFYVE1;KDM6B;CDKN1A;KLHL24;RGS20;SSTR5;PAPSS2;C1orf57;FSTL4;PMEPA1;PTAFR;FILIP1L;SMOX;THNSL2;GCNT2;KLF9;SERPINB8;C2orf18;CECR1;HLA-DRB5;ZNF563;NR2E3;SNX29;ABAT;NEDD9;PLEKHB1;HTR2C;PSTPIP2;SLC38A7;ERRFI1;RIN2;SRGAP3;HES1;DOCK1;NAV2;RASAL1;TSPAN1;FEZ1;OCIAD2;PLEKHG1;C7orf60;OLFM2;…	11;16;18;33;80;82;124;127;133;137;150;151;193;198;201;219;237;244;245;251;252;263;271;303;307;329;333;367;384;418;423;430;444;449;453;516;543;563;585;628;643;651;673;695;711;716;722;786;806;819;846;853;916;990;997;1024;1074;1076;1085;1094;1114;1126;1139;1142;1186;1187;1192;1279;1280;1289;1295;1373;1386;1409;1422;1430;1444;1452;1492;1499;1535;1562;1603;1604;1609;1611;1620;1635;1641;1651;1683;1684;…
RNAseq_upregulated_genes	65	wgEncodeHaibTfbsMcf7Fosl2V0422111PkRep2.broadPeak.gz	FOSL2/MCF-7/None	FOSL2	hg19-tss-centered-10kb-chip-encode-taipale-inhouse	0.0520892	3.3084	FANK1;ABCC2;GPRC5A;PSCA;C15orf38;ACP6;GPR115;C1QTNF6;PTPRE;LIPH;CLU;MACC1;AHNAK2;SILV;ABCC3;C13orf29;SLC25A45;ITGA3;NTSR1;MALAT1;SYTL2;FHL2;GPR87;GCNT4;ABCA12;CLIP4;FAM65C;PLD1;FER1L4;AQP3;TCP11L2;PTPRH;SPINK4;ABAT;SMAD3;KRT19;TMEM40;ANKRD22;ZNF219;C14orf176;KLK6;CAPN2;PI4K2A;STAT6;ALOXE3;CELSR2;ANK1;VAMP5;AMTN;SEPT9;CITED2;BCL10;FAM198B;LOXL4;TSC22D3;ANXA3;CUEDC1;NXNL2;CAPN8;KRT80;ERRFI1;AGR2;CD…	FANK1;ABCC2;GPRC5A;PSCA;C15orf38;ACP6;GPR115;C1QTNF6;PTPRE;LIPH;CLU;MACC1;AHNAK2;SILV;ABCC3;C13orf29;SLC25A45;ITGA3;NTSR1;MALAT1;SYTL2;FHL2;GPR87;GCNT4;ABCA12;CLIP4;FAM65C;PLD1;FER1L4;AQP3;TCP11L2;PTPRH;SPINK4;ABAT;SMAD3;KRT19;TMEM40;ANKRD22;ZNF219;C14orf176;KLK6;CAPN2;PI4K2A;STAT6;ALOXE3;CELSR2;ANK1;VAMP5;AMTN;SEPT9;CITED2;BCL10;FAM198B;LOXL4;TSC22D3;ANXA3;CUEDC1;NXNL2;CAPN8;KRT80;ERRFI1;AGR2;CD…	17;26;29;47;56;59;67;68;75;76;91;108;113;114;124;133;145;148;161;163;174;181;183;186;190;199;200;206;213;220;221;226;228;233;256;264;265;272;273;274;276;277;283;288;299;309;336;341;350;375;386;390;420;443;457;471;473;481;486;491;505;507;517;522;543;548;553;574;580;586;606;607;614;617;630;638;644;658;659;663;673;677;686;694;700;718;741;759;760;764;805;807;814;826;841;858;863;870;889;900;903;938;96…
RNAseq_upregulated_genes	66	jaspar-CN0194.1	LM194		hg19-tss-centered-10kb-10species	0.0292721	3.29317	DKK1;ZNF750;FBLIM1;SOX9;CAPN1;SSTR5;STAT6;SYT15;AGXT2L2;MXD4;CDKN1A;RHCG;RAB26;MAG;PSCA;SNCAIP;NCKAP5L;ZNF226;EPAS1;IQSEC2;C17orf108;COL16A1;LIF;LRRC37A3;CCDC159;NFATC2;ZNF219;COL7A1;SHC4;RHOC;RPS6KL1;CAMK2B;KIAA1217;FILIP1L;PTAFR;NAV2;USP2;ZNF20;FAM155A	DKK1;ZNF750;FBLIM1;SOX9;CAPN1;SSTR5;STAT6;SYT15;AGXT2L2;MXD4;CDKN1A;RHCG;RAB26;MAG;PSCA;SNCAIP;NCKAP5L;ZNF226;EPAS1;IQSEC2;C17orf108;COL16A1;LIF;LRRC37A3;CCDC159;NFATC2;ZNF219;COL7A1;SHC4;RHOC;RPS6KL1;CAMK2B;KIAA1217;FILIP1L;PTAFR;NAV2;USP2;ZNF20;FAM155A;KRT80;NEDD9;PVRL4;KIAA0247;SYNPO;GRHL3;PKD1L2;ALDH3A1;CUEDC1;ITGA3;GADD45G;KCNK3;SEPT9;TGFB2;POU2F3;CAPG;SPINK4;TOM1L2;PLXNB3;SMAD3;PLD1;GPR87;T…	22;34;43;70;79;83;90;99;107;120;127;142;167;204;212;215;229;260;262;272;273;325;334;343;377;380;394;409;414;421;422;443;448;460;461;471;481;499;500;538;580;644;757;813;862;874;883;884;885;892;951;968;993;995;1011;1046;1057;1058;1081;1085;1094;1109;1120;1177;1184;1200;1221;1232;1253;1260;1307;1312;1342;1351;1367;1368;1386;1414;1422;1453;1454;1486;1487;1500;1518;1580;1618;1635;1691;1692;1720;1735;1…
RNAseq_upregulated_genes	67	transfac_pro-M00339	V$ETS1_B	SPIB,GABPB1,ETV4,ETV7,ERG,SPI1,ETV6,FLI1,ELF4,ETS2,ELK3,ERF,ELK1,ELK4,ELF1,GABPA,ELF2,ETS1	hg19-tss-centered-10kb-10species	0.0292702	3.29269	NCKAP5L;COL11A2;LIMK2;ARHGAP30;GRIK5;ZNF219;MAF;CDKN1A;FBLIM1;SHC4;SYTL2;ALDH3A1;ABCC3;A2LD1;RAB5B;POU2F3;ALS2CL;LHFPL2;AFF3;EFCAB10;LRP1;FAM196A;ARHGDIB;LIF;SH3TC2;RASSF2;CAMK1D;SLC43A2;PREX1;PSD4;MXD4;AQP3;FAM49A;YPEL2;GCNT2;ZNF423;SPNS2;ITGA3;KDM6B;C12orf5;WBSCR27;GABARAPL1;RHOQ;ATP10D;CDKL5;CAMK2B;SSTR5;WDR81;S100A11;NTSR1;SEPT9;NFATC2;MDM2;SMOX;EPS8L2;POLD4;SYT8;BCL6;EDN2;SYNPO;CELSR2;ANK3;P…	NCKAP5L;COL11A2;LIMK2;ARHGAP30;GRIK5;ZNF219;MAF;CDKN1A;FBLIM1;SHC4;SYTL2;ALDH3A1;ABCC3;A2LD1;RAB5B;POU2F3;ALS2CL;LHFPL2;AFF3;EFCAB10;LRP1;FAM196A;ARHGDIB;LIF;SH3TC2;RASSF2;CAMK1D;SLC43A2;PREX1;PSD4;MXD4;AQP3;FAM49A;YPEL2;GCNT2;ZNF423;SPNS2;ITGA3;KDM6B;C12orf5;WBSCR27;GABARAPL1;RHOQ;ATP10D;CDKL5;CAMK2B;SSTR5;WDR81;S100A11;NTSR1;SEPT9;NFATC2;MDM2;SMOX;EPS8L2;POLD4;SYT8;BCL6;EDN2;SYNPO;CELSR2;ANK3;P…	4;10;55;63;69;73;74;75;86;87;137;162;163;190;238;244;246;252;254;256;263;269;285;304;314;315;320;331;384;387;409;432;448;537;552;554;581;599;601;622;627;635;640;648;705;718;784;795;797;811;840;842;845;871;880;902;918;924;932;973;980;988;1004;1009;1020;1077;1097;1125;1132;1135;1138;1139;1175;1177;1184;1215;1247;1264;1298;1315;1330;1400;1409;1413;1428;1436;1438;1508;1509;1512;1517;1538;1581;1591;16…
RNAseq_upregulated_genes	68	stark-TGANTCA	TGANTCA	JUN,ARNT	hg19-tss-centered-10kb-10species	0.0292422	3.28557	RGS20;KDM6B;LIF;SERTAD1;LAMC2;PRSS22;FGF13;KIAA0513;SSTR5;NFATC2;CDKN1A;FOSL1;ZNF323;BMP1;COL7A1;EDN2;LMCD1;OCIAD2;FHL2;AHNAK2;YPEL3;KIAA1539;RAB5B;KRT16;NAV2;LRRC37A3;MYO1E;CAPN2;ITGA3;SRMS;LAMB3;SHC4;PROM2;LRRC15;GPR87;MDM2	RGS20;KDM6B;LIF;SERTAD1;LAMC2;PRSS22;FGF13;KIAA0513;SSTR5;NFATC2;CDKN1A;FOSL1;ZNF323;BMP1;COL7A1;EDN2;LMCD1;OCIAD2;FHL2;AHNAK2;YPEL3;KIAA1539;RAB5B;KRT16;NAV2;LRRC37A3;MYO1E;CAPN2;ITGA3;SRMS;LAMB3;SHC4;PROM2;LRRC15;GPR87;MDM2;CLU;PIK3R3;CLDN1;FAM189A2;GPR115;ALOXE3;AQP3;MAF;MAPRE3;NTSR1;SYNPO;SPNS2;ANK1;SLC16A4;MYO16;GCNT2;GOLGA7B;ADCK3;RHOQ;C12orf5;NEDD9;MTRNR2L6;MAP2;MAST4;PCNXL2;PRICKLE2;LTBP2…	2;6;28;37;41;69;72;97;101;113;131;152;200;204;219;229;236;253;259;274;278;314;317;320;359;374;380;381;398;408;414;425;437;445;471;473;569;577;587;605;609;635;641;694;733;738;794;806;849;853;917;939;1026;1052;1090;1093;1101;1111;1124;1130;1163;1165;1171;1240;1241;1242;1245;1246;1344;1358;1362;1368;1371;1385;1389;1416;1443;1444;1453;1458;1488;1515;1516;1524;1557;1558;1577;1578;1612;1628;1642;1651;1…
RNAseq_upregulated_genes	69	taipale-RGGTCANNNARRGGTCA-Rarb-DBD	RGGTCANNNARRGGTCA-Rarb-DBD	RARA,NR2F1,RXRA,RARG,PPARA	hg19-tss-centered-10kb-10species	0.0292254	3.2813	BAX;NTN4;DUSP4;SYTL1;MCC;KDM6B;CAMK2B;LHFPL2;FXYD3;FSTL4;RIN2;PMEPA1;SYBU;B4GALT1;ERRFI1;RHCG;PAPSS2;KLF9;SNX29;THNSL2;C1orf57;PVRL4;ZNF563;ADAMTS9;CDKL5;ALDH3A1;RNF207;ODZ4;OPHN1;CECR1;SMOX;KDM4B;UGT1A6;KLHDC7A;COL7A1;SERPINA1;SSTR5;PSTPIP2;KLHL24;SLC38A7	BAX;NTN4;DUSP4;SYTL1;MCC;KDM6B;CAMK2B;LHFPL2;FXYD3;FSTL4;RIN2;PMEPA1;SYBU;B4GALT1;ERRFI1;RHCG;PAPSS2;KLF9;SNX29;THNSL2;C1orf57;PVRL4;ZNF563;ADAMTS9;CDKL5;ALDH3A1;RNF207;ODZ4;OPHN1;CECR1;SMOX;KDM4B;UGT1A6;KLHDC7A;COL7A1;SERPINA1;SSTR5;PSTPIP2;KLHL24;SLC38A7;LRRC37A3;SPRY1;NR2E3;ALS2CL;KIAA1217;FAM65C;ABAT;GATS;ABCA12;ANTXR1;C7orf60;SMAD3;C2orf18;KIAA1539;ZNF219;CAT;SHC4;TSPAN1;SLC25A42;SERPINB8;DO…	17;28;51;74;77;89;95;96;97;103;138;139;210;230;243;244;269;275;290;301;307;340;341;353;376;389;395;418;422;426;433;438;443;458;470;471;472;474;487;488;520;592;627;636;647;745;757;819;835;845;874;898;917;931;963;970;982;985;1013;1028;1033;1043;1063;1074;1080;1098;1120;1121;1145;1167;1199;1202;1212;1218;1223;1280;1314;1324;1334;1335;1354;1363;1367;1385;1391;1415;1449;1471;1536;1562;1594;1610;1621;1…
RNAseq_upregulated_genes	70	taipale-RRGGTCANNNARAGGTCA-RARG-DBD	RRGGTCANNNARAGGTCA-RARG-DBD	RARA,NR2F1,RXRA,RARG,PPARA	hg19-tss-centered-10kb-10species	0.0292161	3.27893	BAX;NTN4;SYTL1;KDM6B;LHFPL2;DUSP4;RIN2;SYBU;CAMK2B;MCC;FSTL4;USP2;SERPINA1;ALDH3A1;SPRY1;FXYD3;RHCG;KLF9;KIAA1217;PVRL4;CECR1;SMOX;ADAMTS9;CDKL5;ZNF563;OPHN1;RNF207;NR2E3;OCIAD2;CAT;CDKN1A;PAPSS2;THNSL2;PLCL2;ERRFI1;THRSP;HLA-DRB5;SLC38A7;PMEPA1;FAM198B;PSTPIP2;BLNK;SHC4;ITGA3;LOC643008;COL7A1;C1orf57;B4GALT1;PCNXL2;OLFM2;SNX29;KIAA1539;ZNF219;BIK;STEAP3;FAM65C;SPTBN5;NEDD9;SMAD3;NMNAT2;KLHDC7A;T…	BAX;NTN4;SYTL1;KDM6B;LHFPL2;DUSP4;RIN2;SYBU;CAMK2B;MCC;FSTL4;USP2;SERPINA1;ALDH3A1;SPRY1;FXYD3;RHCG;KLF9;KIAA1217;PVRL4;CECR1;SMOX;ADAMTS9;CDKL5;ZNF563;OPHN1;RNF207;NR2E3;OCIAD2;CAT;CDKN1A;PAPSS2;THNSL2;PLCL2;ERRFI1;THRSP;HLA-DRB5;SLC38A7;PMEPA1;FAM198B;PSTPIP2;BLNK;SHC4;ITGA3;LOC643008;COL7A1;C1orf57;B4GALT1;PCNXL2;OLFM2;SNX29;KIAA1539;ZNF219;BIK;STEAP3;FAM65C;SPTBN5;NEDD9;SMAD3;NMNAT2;KLHDC7A;T…	23;37;48;52;57;83;95;128;131;142;164;173;175;177;190;212;225;238;241;253;261;274;276;308;310;336;345;387;391;400;412;421;477;486;491;531;566;587;600;613;615;619;632;642;710;717;732;734;751;766;780;786;802;828;843;865;867;870;888;891;903;913;982;1010;1011;1025;1046;1064;1118;1119;1126;1135;1149;1153;1156;1161;1202;1227;1268;1287;1300;1306;1335;1341;1370;1374;1431;1443;1452;1480;1485;1554;1577;1578…
RNAseq_upregulated_genes	71	taipale-TTGGCANNNTGCCAR-NFIA-full	TTGGCANNNTGCCAR-NFIA-full	NFIC,NFIB,NFIA,NFIX,NF1	hg19-tss-centered-10kb-10species	0.0291415	3.25994	TGFB2;SCD5;AGR2;SYT8;SLC12A4;FBXO44;ZMAT3;FGF18;FILIP1L;C1orf183;PLEKHG1;ITGA3;GAD1;C16orf5;ARHGEF37;PPM1D;SHC4;LMO7;LIF;FAM49A;MDM2;ANXA4;PRICKLE2;MCC;ZNF323;ALS2CL;PIK3R3;SYNPO;SYT15;CDKN1A;DNAH1;CALD1;ABCA12;DIXDC1;EDN1;TMEM99;ABAT;PCNXL2;KLF9;NAV2;RNF19A;TIMP3;GADD45G;C13orf31;COL16A1;PNRC1;PMP22;MBNL2;CLCA2;LAMB3;NTSR1;FSTL4;AFAP1L2;FGF13;MAP2;RASSF2;CAPN1;MXD4;TSC22D3;IGFBP5;SCUBE2;PVALB;FI…	TGFB2;SCD5;AGR2;SYT8;SLC12A4;FBXO44;ZMAT3;FGF18;FILIP1L;C1orf183;PLEKHG1;ITGA3;GAD1;C16orf5;ARHGEF37;PPM1D;SHC4;LMO7;LIF;FAM49A;MDM2;ANXA4;PRICKLE2;MCC;ZNF323;ALS2CL;PIK3R3;SYNPO;SYT15;CDKN1A;DNAH1;CALD1;ABCA12;DIXDC1;EDN1;TMEM99;ABAT;PCNXL2;KLF9;NAV2;RNF19A;TIMP3;GADD45G;C13orf31;COL16A1;PNRC1;PMP22;MBNL2;CLCA2;LAMB3;NTSR1;FSTL4;AFAP1L2;FGF13;MAP2;RASSF2;CAPN1;MXD4;TSC22D3;IGFBP5;SCUBE2;PVALB;FI…	1;48;50;55;80;84;95;104;122;131;135;142;167;173;176;184;188;204;205;207;213;233;243;266;276;281;291;308;329;383;413;479;540;548;585;589;657;659;670;673;675;681;687;706;725;777;794;868;880;887;912;941;972;978;995;1035;1041;1098;1109;1115;1129;1132;1133;1176;1209;1235;1243;1253;1254;1255;1368;1375;1383;1385;1395;1399;1421;1426;1447;1492;1499;1500;1503;1523;1547;1572;1579;1582;1594;1607;1613;1614;16…
RNAseq_upregulated_genes	72	wgEncodeHaibTfbsT47dP300V0416102Dm002p1hPkRep2.broadPeak.gz	p300/T-47D/DMSO_0.02pct	EP300	hg19-tss-centered-10kb-chip-encode-taipale-inhouse	0.0511394	3.21017	HES1;PNRC1;FAM174B;CCND1;MXD4;MALAT1;KRT19;CUEDC1;DDIT4;CITED2;NEDD9;SEPT9;MED23;LOC401109;NEAT1;MKNK2;KRT80;PSG9;C15orf38;CAPN2;EDN1;PSCA;FAM83A;TP53INP1;KRT15;BCAS1;CCNG2;SYBU;PIK3IP1;ELF3;ABCC3;GPRC5A;CALML5;LOC645431;SERTAD1;PIK3R3;MDM2;GLUL;RAB40B;TSPAN1;SYT8;PVRL4;C10orf116;FOS;PBLD;DUSP6;PYROXD2;SLC43A2;KDM6B;NCRNA00173;BLNK;ARHGEF37;PREX1;YPEL2;C14orf182;PNPLA7;ARL15;CYFIP2;KDM4A;DRAM1;UB…	HES1;PNRC1;FAM174B;CCND1;MXD4;MALAT1;KRT19;CUEDC1;DDIT4;CITED2;NEDD9;SEPT9;MED23;LOC401109;NEAT1;MKNK2;KRT80;PSG9;C15orf38;CAPN2;EDN1;PSCA;FAM83A;TP53INP1;KRT15;BCAS1;CCNG2;SYBU;PIK3IP1;ELF3;ABCC3;GPRC5A;CALML5;LOC645431;SERTAD1;PIK3R3;MDM2;GLUL;RAB40B;TSPAN1;SYT8;PVRL4;C10orf116;FOS;PBLD;DUSP6;PYROXD2;SLC43A2;KDM6B;NCRNA00173;BLNK;ARHGEF37;PREX1;YPEL2;C14orf182;PNPLA7;ARL15;CYFIP2;KDM4A;DRAM1;UB…	16;18;25;29;30;32;33;35;38;40;48;50;57;62;63;81;82;98;108;115;116;135;152;153;159;165;195;199;203;217;220;222;231;261;271;273;284;285;286;328;339;341;345;372;373;376;387;390;410;414;423;424;441;446;456;468;472;481;495;498;523;528;530;532;553;580;609;629;639;649;654;657;663;664;693;700;701;752;785;802;825;835;867;873;883;884;890;903;908;931;957;966;969;975;982;1009;1014;1017;1035;1044;1075;1077;11…
RNAseq_upregulated_genes	73	factorbook-AP1	AP1	BATF,SPI1,FOS,BACH2,FOSB,JUNB,JUN,JUND,JDP2,ARNT,FOSL1,FOSL2,BACH1	hg19-tss-centered-10kb-10species	0.0289455	3.2101	RGS20;KDM6B;CDKN1A;FGF13;BMP1;LAMC2;KIAA0513;SHC4;COL7A1;KIAA1539;PROM2;CAPN2;PRSS22;LTBP2;SEPT9;FHL2;EDN2;SERTAD1;LRRC37A3;MAPRE3;ATP10D;POU2F3;NAV2;SSTR5;KRT16;TMBIM1;LAMB3;NFATC2;PCNXL2;RAB5B;GPR87;EFCAB10;KIAA1217;MDM2;ITGA3;TGFBI;OCIAD2;YPEL3;ZNF219;ODZ4;SYT8;AHNAK2;GPR115;TRAK1;GRIK5;LMCD1;A2LD1;CLIP4;RNF144B;MACC1;AQP3;DNAH1;SLC25A45;ADCK3;TPP1;SYTL2;UBE2H;TNFRSF10B;THNSL2;GCNT2;IQSEC2;MTR…	RGS20;KDM6B;CDKN1A;FGF13;BMP1;LAMC2;KIAA0513;SHC4;COL7A1;KIAA1539;PROM2;CAPN2;PRSS22;LTBP2;SEPT9;FHL2;EDN2;SERTAD1;LRRC37A3;MAPRE3;ATP10D;POU2F3;NAV2;SSTR5;KRT16;TMBIM1;LAMB3;NFATC2;PCNXL2;RAB5B;GPR87;EFCAB10;KIAA1217;MDM2;ITGA3;TGFBI;OCIAD2;YPEL3;ZNF219;ODZ4;SYT8;AHNAK2;GPR115;TRAK1;GRIK5;LMCD1;A2LD1;CLIP4;RNF144B;MACC1;AQP3;DNAH1;SLC25A45;ADCK3;TPP1;SYTL2;UBE2H;TNFRSF10B;THNSL2;GCNT2;IQSEC2;MTR…	1;4;22;27;34;42;68;82;93;100;103;109;144;146;151;178;233;238;267;289;342;353;379;383;390;392;394;397;405;412;441;450;482;499;506;517;532;591;604;605;609;615;754;781;785;795;807;814;815;816;831;854;871;900;902;943;947;996;1045;1055;1058;1069;1084;1097;1118;1130;1137;1140;1146;1153;1161;1185;1192;1207;1216;1242;1290;1298;1335;1365;1418;1443;1500;1521;1522;1561;1563;1579;1588;1600;1604;1616;1632;163…
RNAseq_upregulated_genes	74	swissregulon-FOX_D1-D2_.p2	FOXD2,FOXD1	FOXJ3,FOXK1,FOXG1,FOXD1,FOXA1,FOXO1,FOXA2,FOXF2	hg19-tss-centered-10kb-10species	0.0289362	3.20773	PIK3IP1;YPEL2;LOC100129716;CITED2;SPOCK2;BBC3;TXNIP;SLC12A6;BIK;CYGB;RIN2;KLHL24;MXD4;FGF13;YPEL3;MTRNR2L2;EFCAB10;SYTL2;ADCK3;BTG1;LMBR1L;ARNTL;ZFYVE1;MTRNR2L6;RBL2;MBNL2;FAM189A2;PNRC1;ABCC3;EOMES;TRAK1;DIXDC1;ATP10D;FOS;CALD1;AHNAK2;PDK4;MAF;USP2;COL17A1;NFATC2;AFF3;CDKN1A;LRRC37A3;CAPN1;PLAU;LHFPL2	PIK3IP1;YPEL2;LOC100129716;CITED2;SPOCK2;BBC3;TXNIP;SLC12A6;BIK;CYGB;RIN2;KLHL24;MXD4;FGF13;YPEL3;MTRNR2L2;EFCAB10;SYTL2;ADCK3;BTG1;LMBR1L;ARNTL;ZFYVE1;MTRNR2L6;RBL2;MBNL2;FAM189A2;PNRC1;ABCC3;EOMES;TRAK1;DIXDC1;ATP10D;FOS;CALD1;AHNAK2;PDK4;MAF;USP2;COL17A1;NFATC2;AFF3;CDKN1A;LRRC37A3;CAPN1;PLAU;LHFPL2;RASSF2;SSTR5;NYNRIN;TGFBI;SLC25A45;MYO16;FHL2;PBLD;GRHL3;ARL15;TSPAN1;PCLO;FSTL4;CYP4F8;GCNT4;R…	7;12;17;53;57;58;77;92;93;116;144;147;169;180;184;197;206;223;224;238;265;289;299;323;349;361;365;369;375;399;433;544;546;548;559;565;579;581;601;605;615;619;640;651;674;684;702;740;775;839;858;905;914;967;986;1009;1035;1067;1094;1126;1132;1146;1168;1223;1264;1270;1284;1322;1327;1381;1390;1429;1440;1503;1505;1569;1580;1589;1603;1604;1611;1618;1622;1627;1654;1684;1709;1732;1785;1792;1804;1865;1893…
RNAseq_upregulated_genes	75	wgEncodeHaibTfbsA549P300V0422111Etoh02PkRep1.broadPeak.gz	p300/A549/EtOH_0.02pct	EP300	hg19-tss-centered-10kb-chip-encode-taipale-inhouse	0.0509285	3.18837	GDF15;CAPG;NCRNA00173;FLJ35776;ABCC3;UGT1A6;ALDH3A1;NEAT1;MYEOV;COL7A1;CYP24A1;SMAD3;BCL2L1;ABCC2;CLU;NR2E3;C1QTNF6;GPRC5A;ERRFI1;C17orf91;WDR81;SEPT9;MYOF;CAPN2;DDIT4;SPINK4;ID3;TGFBI;KLF9;HIST2H2BE;BCAS1;HIST1H2BC;ANXA4;KRT80;HIST1H4H;SLC25A45;TMC7;SYNPO;CCND1;ST3GAL5;BBC3;EDN1;B4GALT1;AHNAK2;PLAU;RIN2;COL16A1;LIF;DYRK1B;PLD1;MALAT1;ASB9;UBE2H;DKK1;RHCG;RBM20;LTBP2;PNRC1;KRT3;FAM65C;KDM6B;TNS4;…	GDF15;CAPG;NCRNA00173;FLJ35776;ABCC3;UGT1A6;ALDH3A1;NEAT1;MYEOV;COL7A1;CYP24A1;SMAD3;BCL2L1;ABCC2;CLU;NR2E3;C1QTNF6;GPRC5A;ERRFI1;C17orf91;WDR81;SEPT9;MYOF;CAPN2;DDIT4;SPINK4;ID3;TGFBI;KLF9;HIST2H2BE;BCAS1;HIST1H2BC;ANXA4;KRT80;HIST1H4H;SLC25A45;TMC7;SYNPO;CCND1;ST3GAL5;BBC3;EDN1;B4GALT1;AHNAK2;PLAU;RIN2;COL16A1;LIF;DYRK1B;PLD1;MALAT1;ASB9;UBE2H;DKK1;RHCG;RBM20;LTBP2;PNRC1;KRT3;FAM65C;KDM6B;TNS4;…	1;5;11;29;53;59;66;87;92;105;109;117;131;137;140;142;143;144;147;155;156;178;184;206;210;217;235;237;242;246;258;272;273;281;288;290;293;304;307;311;314;317;319;328;329;335;339;349;382;386;387;396;402;409;418;419;447;453;462;478;486;504;515;516;535;536;540;556;570;597;599;609;614;615;645;662;687;710;726;738;745;753;757;768;789;791;795;797;802;831;866;879;892;928;962;965;966;1000;1029;1054;1067;10…
RNAseq_upregulated_genes	76	homer-M00123	NFkB-p65-Rel(RHD)/LPS-exp/Homer	NFKB1,NFKB2,BCL3,RELA,REL	hg19-tss-centered-10kb-10species	0.0288149	3.17687	PTGES;KLF9;RASSF2;TNFSF15;STAT6;FEZ1;KIAA1217;SERPINA1;UGT1A6;NTN4;DUSP6;CDKN1A;MBNL2;SLC6A14;GRHL3;C17orf108;KDM6B;C18orf1;CT62;PLAU;OXTR;PHLDA3;YPEL5;NUAK1;C7orf60;EFCAB10;ELF3;C17orf103;FHL2;DIRC3;SYNPO;ITGB6;RIN2;SSTR5	PTGES;KLF9;RASSF2;TNFSF15;STAT6;FEZ1;KIAA1217;SERPINA1;UGT1A6;NTN4;DUSP6;CDKN1A;MBNL2;SLC6A14;GRHL3;C17orf108;KDM6B;C18orf1;CT62;PLAU;OXTR;PHLDA3;YPEL5;NUAK1;C7orf60;EFCAB10;ELF3;C17orf103;FHL2;DIRC3;SYNPO;ITGB6;RIN2;SSTR5;RNF19A;SMAD3;MCC;CAPN1;MDM2;RHOC;LIF;ABCC3;AGR2;PREX1;KCNF1;GUCY1B2;PCDHA10;COL16A1;LTBP2;TMEM125;FAM155A;SHC4;LRRC37A3;NFATC2;UBE2H;ODZ4;PLCL2;P2RX2;BEX4;RAB5B;ALDH3A1;SNCAIP;…	3;31;48;66;84;95;107;138;146;147;155;163;170;174;179;203;204;209;227;233;235;279;282;288;307;317;324;342;386;407;422;424;434;450;539;563;575;663;686;691;720;723;726;729;745;761;772;782;793;840;872;887;914;918;920;1003;1035;1077;1083;1099;1102;1103;1106;1109;1121;1181;1182;1187;1191;1214;1242;1297;1332;1365;1476;1484;1544;1549;1550;1562;1566;1571;1579;1592;1599;1615;1623;1659;1674;1710;1745;1750;1…
RNAseq_upregulated_genes	77	yetfasco-1363	YEL009C	BATF,SPI1,FOS,NFE2L2,BACH1,JUNB,JUN,JUND,JDP2,ARNT,FOSL1,NFE2,FOSL2,BACH2,FOSB	hg19-tss-centered-10kb-10species	0.0287346	3.15646	RGS20;FOSL1;KIAA1539;KIAA0513;BMP1;KDM6B;CDKN1A;FGF13;LAMB3;FEZ1;LAMC2;NAV2;CAPN2;SHC4;ANK1;EDN2;ZNF323;LRRC37A3;MYO1E;PROM2;SEPT9;CNFN;NFATC2;FHL2;EFCAB10;KCNK3;RAB5B;PRSS22;PCNXL2;ITGA3;LTBP2;LHFPL2;POU2F3;GRIK5;ADCK3;SMAD3;PSCA;SERTAD1;SPNS2;FAM189A2;YPEL3;PCLO;RHOC;KRT16;SSTR5;GADD45A;YPEL5	RGS20;FOSL1;KIAA1539;KIAA0513;BMP1;KDM6B;CDKN1A;FGF13;LAMB3;FEZ1;LAMC2;NAV2;CAPN2;SHC4;ANK1;EDN2;ZNF323;LRRC37A3;MYO1E;PROM2;SEPT9;CNFN;NFATC2;FHL2;EFCAB10;KCNK3;RAB5B;PRSS22;PCNXL2;ITGA3;LTBP2;LHFPL2;POU2F3;GRIK5;ADCK3;SMAD3;PSCA;SERTAD1;SPNS2;FAM189A2;YPEL3;PCLO;RHOC;KRT16;SSTR5;GADD45A;YPEL5;SLC7A8;SULT1A1;BBC3;ATP10D;GPR87;AHNAK2;TRAK1;CLIP4;A2LD1;GPRC5A;MVP;CYP4F8;CAMK2B;RHOQ;ZNF423;KANK3;PP…	2;24;37;47;53;64;70;84;88;125;149;156;170;183;199;207;215;231;247;289;299;312;323;324;330;336;367;379;425;434;445;469;470;477;533;540;552;595;596;618;635;643;670;680;690;700;717;751;766;794;811;812;838;901;914;921;956;995;1084;1107;1112;1115;1123;1156;1200;1202;1219;1220;1227;1234;1239;1254;1262;1272;1310;1328;1329;1351;1360;1361;1432;1434;1473;1481;1483;1510;1525;1568;1640;1664;1688;1694;1736;17…
RNAseq_upregulated_genes	78	transfac_pro-M00775	V$NFY_Q6_01	NFYC,NFYB,NFYA,YBX1,POLE3	hg19-tss-centered-10kb-10species	0.0286563	3.13653	HIST1H2AI;MXD1;MXD4;RAP2B;SLC25A42;ARID4A;HIST2H2BE;ARNTL;HES1;WBP1;PIK3R3;TXNIP;ALDH4A1;RHOQ;ADCK3;ARRDC4;PNRC1;HIST1H2BC;RAB4B;KDM6B;C17orf91;SH3BGR;SLC43A2;WDR81;KIAA1539;CAT;C5orf41;PPP2R5B;RFX5;SHC4;KDM4A;MGC23284;MAP3K12;TSPYL2;PDCD4;RAB5B;C20orf194;RAB40B;ARL15;ABAT;PDK4;C1orf183;CDKL5;SESN3;DUSP10;MKNK2;TMEM45B;EML2;FGD3;DUSP6;PIK3IP1;SERTAD1;SESN2;DYRK1B;LRRC37A3;NR2E3;HIST2H2BF;KRT19;FO…	HIST1H2AI;MXD1;MXD4;RAP2B;SLC25A42;ARID4A;HIST2H2BE;ARNTL;HES1;WBP1;PIK3R3;TXNIP;ALDH4A1;RHOQ;ADCK3;ARRDC4;PNRC1;HIST1H2BC;RAB4B;KDM6B;C17orf91;SH3BGR;SLC43A2;WDR81;KIAA1539;CAT;C5orf41;PPP2R5B;RFX5;SHC4;KDM4A;MGC23284;MAP3K12;TSPYL2;PDCD4;RAB5B;C20orf194;RAB40B;ARL15;ABAT;PDK4;C1orf183;CDKL5;SESN3;DUSP10;MKNK2;TMEM45B;EML2;FGD3;DUSP6;PIK3IP1;SERTAD1;SESN2;DYRK1B;LRRC37A3;NR2E3;HIST2H2BF;KRT19;FO…	9;27;29;30;43;59;66;81;91;93;94;126;142;154;173;185;194;195;253;273;301;312;318;324;343;350;372;385;413;424;435;484;526;535;560;575;619;624;626;632;656;658;665;678;700;729;759;768;786;811;812;829;890;911;921;953;965;978;982;986;1001;1022;1062;1065;1085;1113;1123;1156;1160;1196;1199;1219;1241;1254;1256;1261;1263;1298;1299;1306;1315;1352;1364;1372;1382;1399;1423;1430;1439;1451;1467;1555;1564;1593;1…
RNAseq_upregulated_genes	79	elemento-ATCAGCTG	ATCAGCTG		hg19-tss-centered-10kb-10species	0.0286395	3.13225	MAF;WDR81;MAST4;SLC12A6;CDKN1A;TP53INP1;SYBU;RAP2B;KIAA1539;C12orf5;PRICKLE2;YPEL5;PLK3;UBE2H;FOS;SHC4;RGS20;FAM189A2;LIF;CLSTN3;SSTR5;CCR7;ZFYVE1;C17orf103;TGFBI;FGF13;KCNF1	MAF;WDR81;MAST4;SLC12A6;CDKN1A;TP53INP1;SYBU;RAP2B;KIAA1539;C12orf5;PRICKLE2;YPEL5;PLK3;UBE2H;FOS;SHC4;RGS20;FAM189A2;LIF;CLSTN3;SSTR5;CCR7;ZFYVE1;C17orf103;TGFBI;FGF13;KCNF1;PIK3R3;SYTL2;BTG1;AHNAK2;BCAS1;SEPT9;RAB5B;DIRC3;ALDH3A1;LHFPL2;PRKX;GNG3;POU2F3;PTAFR;EFCAB10;ODZ4;FGGY;CLCA2;ST6GALNAC2;BEX4;RASSF2;AMTN;SRPX;MYO16;IQSEC2;ZNF323;NTSR1;ORAI3;SMAD3;SULF2;ACHE;MAP2;LAMB3;SYNPO;INPP1;SPRY1;GC…	8;9;14;25;45;53;59;62;76;117;134;136;143;211;217;218;231;250;252;261;281;296;313;314;323;339;343;426;434;441;452;466;473;535;550;582;588;600;606;610;641;659;672;711;719;736;744;793;801;810;815;867;893;911;950;986;992;1145;1213;1268;1277;1342;1372;1380;1399;1425;1427;1451;1469;1499;1553;1554;1563;1576;1581;1603;1620;1676;1703;1734;1761;1790;1853;1882;1883;1905;1915;2012;2028;2068;2077;2078;2103;21…
RNAseq_upregulated_genes	80	yetfasco-695	YKL109W	HOXC8,HOXB8,HOXD8,NFYC,NFYB,NFYA,POLE4	hg19-tss-centered-10kb-10species	0.0285406	3.1071	ARID4A;HIST1H2AI;HIST2H2BE;MKNK2;CCNG1;HIST1H2BC;RHOQ;WDR81;ALDH4A1;DUSP10;HIST2H2BF;SHC4;RPS6KA2;KLF9;ASB9;PDK4;SERTAD1;HIST1H3A;WBP1;ARRDC4;C20orf194;CDKN1A;RAP2B;EPS8L1;SOX9;SULF2;SESN2;UCP2;C17orf91;NR2E3;LPXN;TMEM45B;SSTR5;CAT;HIST1H3E;C1QTNF6;FGD3;SARDH;ATP10D;TXNIP;RFX5;AGR2;CCNG2;EFCAB10;FAM198B;ZNF323;IQSEC2;CDKL5;SYTL5	ARID4A;HIST1H2AI;HIST2H2BE;MKNK2;CCNG1;HIST1H2BC;RHOQ;WDR81;ALDH4A1;DUSP10;HIST2H2BF;SHC4;RPS6KA2;KLF9;ASB9;PDK4;SERTAD1;HIST1H3A;WBP1;ARRDC4;C20orf194;CDKN1A;RAP2B;EPS8L1;SOX9;SULF2;SESN2;UCP2;C17orf91;NR2E3;LPXN;TMEM45B;SSTR5;CAT;HIST1H3E;C1QTNF6;FGD3;SARDH;ATP10D;TXNIP;RFX5;AGR2;CCNG2;EFCAB10;FAM198B;ZNF323;IQSEC2;CDKL5;SYTL5;LRRC37A3;CPEB4;KDM6B;C12orf5;STAT6;MDM2;MAF;C3orf57;FGF13;PNRC1;MAST…	1;27;29;73;77;88;89;108;117;124;143;145;153;189;197;204;207;224;239;244;274;275;315;345;367;395;423;443;448;449;463;481;489;497;499;541;559;560;594;595;605;610;644;646;662;669;674;700;711;757;776;791;809;863;878;928;931;960;1065;1079;1108;1149;1167;1189;1207;1220;1226;1239;1247;1295;1301;1345;1354;1377;1410;1435;1439;1444;1456;1477;1513;1520;1522;1525;1560;1614;1621;1657;1742;1757;1760;1791;1806;…
RNAseq_upregulated_genes	81	wgEncodeHaibTfbsMcf7Tcf12V0422111PkRep2.broadPeak.gz	TCF12/MCF-7/None	TCF12	hg19-tss-centered-10kb-chip-encode-taipale-inhouse	0.0500626	3.09882	SPINK4;GPRC5A;NAV2;SEPT9;CUEDC1;SLC12A4;C1QTNF6;FAM174B;GDF15;C15orf38;HES1;KRT19;SYTL2;CELSR2;GCNT4;KLF9;CALML5;MACC1;AGR3;FILIP1L;HSH2D;ACER2;GOLGA7B;SYT8;ELF3;SMAD3;WISP2;YPEL3;PGLYRP2;DAPK1;PTPRE;TSPAN1;NEAT1;C5orf4;C3orf57;C18orf1;ID3;NXNL2;PRSS22;CAPN2;KRT80;FAM83A;TSC22D3;UBE2H;CLIP4;RBL2;HIST1H2BC;CITED2;ABCC3;ABCC2;ANXA3;CNTD2;HIST1H4H;KRT15;AGR2;HSPB8;FGF13;USP2;FMN1	SPINK4;GPRC5A;NAV2;SEPT9;CUEDC1;SLC12A4;C1QTNF6;FAM174B;GDF15;C15orf38;HES1;KRT19;SYTL2;CELSR2;GCNT4;KLF9;CALML5;MACC1;AGR3;FILIP1L;HSH2D;ACER2;GOLGA7B;SYT8;ELF3;SMAD3;WISP2;YPEL3;PGLYRP2;DAPK1;PTPRE;TSPAN1;NEAT1;C5orf4;C3orf57;C18orf1;ID3;NXNL2;PRSS22;CAPN2;KRT80;FAM83A;TSC22D3;UBE2H;CLIP4;RBL2;HIST1H2BC;CITED2;ABCC3;ABCC2;ANXA3;CNTD2;HIST1H4H;KRT15;AGR2;HSPB8;FGF13;USP2;FMN1;ANK3;PLK3;KRT3;DKK1…	5;12;13;14;41;45;47;48;50;54;66;68;71;79;85;101;108;115;130;142;149;151;152;162;191;195;198;201;212;223;240;250;257;261;267;274;276;277;278;284;308;312;317;324;350;355;356;360;362;365;397;400;403;407;413;420;421;429;441;551;560;677;731;775;784;897;919;973;988;997;1059;1119;1125;1143;1148;1172;1178;1190;1193;1364;1392;1403;1406;1433;1438;1481;1553;1648;1653;1691;1727;1756;1900;1904;1910;2005;2019;…
RNAseq_upregulated_genes	82	hdpi-CEBPG	CEBPG	CEBPG	hg19-tss-centered-10kb-10species	0.028479	3.09143	CDKN1A;MXD4;SEPT9;RASSF2;EDN2;PTAFR;SYT8;SYNPO;P2RX2;USP2;SLC7A8;FBLIM1;DTX1;SHC4;KIAA1539;PMP22;STEAP3;RAB26;NTSR1;KCNF1;PVALB;SSTR5;POU2F3;KCNK3;MDM2;PLK3;ABCC6;SERPINA1;PRSS22;C16orf5;LRRC15;GRHL3;LIF;PADI3;SMAD3;FXYD3;RAB5B;LOXL4;TRIM29;FIBCD1;HSPB8;AQP3;C9orf9;PPP2R5B;KANK3;PLA2G3;CUEDC1;EFCAB10;COL16A1;ADAMTS7;ABCC3;KRT16;RHOQ;TMBIM1;ABAT;SPNS2;GRIK5;LDB3;SMOX;SLC25A42;FHL2;VIPR1;NFATC2;KRT…	CDKN1A;MXD4;SEPT9;RASSF2;EDN2;PTAFR;SYT8;SYNPO;P2RX2;USP2;SLC7A8;FBLIM1;DTX1;SHC4;KIAA1539;PMP22;STEAP3;RAB26;NTSR1;KCNF1;PVALB;SSTR5;POU2F3;KCNK3;MDM2;PLK3;ABCC6;SERPINA1;PRSS22;C16orf5;LRRC15;GRHL3;LIF;PADI3;SMAD3;FXYD3;RAB5B;LOXL4;TRIM29;FIBCD1;HSPB8;AQP3;C9orf9;PPP2R5B;KANK3;PLA2G3;CUEDC1;EFCAB10;COL16A1;ADAMTS7;ABCC3;KRT16;RHOQ;TMBIM1;ABAT;SPNS2;GRIK5;LDB3;SMOX;SLC25A42;FHL2;VIPR1;NFATC2;KRT…	39;67;78;119;120;138;141;147;153;164;168;170;171;188;189;191;216;224;248;258;269;279;281;287;302;360;379;406;451;461;467;491;505;510;521;529;539;568;570;573;576;584;605;609;631;637;650;674;681;690;707;742;764;773;824;828;845;846;866;879;889;897;904;913;920;928;933;938;957;966;968;975;1016;1019;1031;1055;1064;1074;1088;1103;1155;1165;1189;1195;1206;1237;1245;1248;1251;1262;1277;1287;1290;1300;1301…
RNAseq_upregulated_genes	83	wgEncodeHaibTfbsMcf7Tcf12V0422111PkRep1.broadPeak.gz	TCF12/MCF-7/None	TCF12	hg19-tss-centered-10kb-chip-encode-taipale-inhouse	0.0498872	3.08068	HES1;SPINK4;SEPT9;SLC12A4;GPRC5A;C1QTNF6;KRT19;C15orf38;HSH2D;SYT8;FAM83A;CELSR2;ID3;KRT80;GDF15;SYTL2;PRSS22;KLF9;NAV2;MACC1;PGLYRP2;RAB37;KLK6;YPEL3;SLC43A2;SYNPO;CITED2;FAM174B;ABAT;MALAT1;CALML5;TSPAN1;AGR3;CUEDC1;ELF3;C18orf1;CNTD2;UBE2H;WISP2;NEAT1;TP53INP1;FMN1;AQP3;CCND1;CCNG2;C3orf57;KRT15;RBL2;NXNL2	HES1;SPINK4;SEPT9;SLC12A4;GPRC5A;C1QTNF6;KRT19;C15orf38;HSH2D;SYT8;FAM83A;CELSR2;ID3;KRT80;GDF15;SYTL2;PRSS22;KLF9;NAV2;MACC1;PGLYRP2;RAB37;KLK6;YPEL3;SLC43A2;SYNPO;CITED2;FAM174B;ABAT;MALAT1;CALML5;TSPAN1;AGR3;CUEDC1;ELF3;C18orf1;CNTD2;UBE2H;WISP2;NEAT1;TP53INP1;FMN1;AQP3;CCND1;CCNG2;C3orf57;KRT15;RBL2;NXNL2;RAB26;SERTAD1;LOC284379;CD22;SLC7A8;AGR2;SMAD3;CAPN9;MAP3K1;DDIT4;A4GALT;TSC22D3;FILIP1L…	15;16;27;30;32;43;49;56;61;81;84;106;108;111;124;130;141;143;144;145;146;148;149;151;155;159;165;166;178;181;183;201;211;220;226;235;240;248;274;294;300;312;320;324;337;338;350;361;363;444;469;480;491;492;507;531;533;537;544;557;558;566;571;578;590;612;613;622;633;659;669;683;692;720;733;783;792;821;874;879;901;902;918;924;970;986;1051;1086;1155;1212;1256;1259;1587;1643;1658;1706;1726;1739;1787;1…
RNAseq_upregulated_genes	84	hdpi-DUS3L	DUS3L	DUS3L	hg19-tss-centered-10kb-10species	0.0283707	3.0639	CDKN1A;DNAH1;SYNPO;TMBIM1;EDN2;SPNS2;FBLIM1;SSTR5;MVP;KIAA1683;SH3BP5;PTAFR;TMEM40;SULF2;SMOX;KRT83;SLC25A42;FAM65C;LTBP2;PAQR7;GATS;SHC4;STAT6;SEPT9;PSD4;ZNF469;MXD4;ABAT;CUEDC1;KANK3;CSTA;CELSR2;TRIM29;C14orf159;LOC284379;C2orf18;STEAP3;POU2F3;NTSR1;CAPN1;RAB26;AQP3;PSCA;SMAD3;CAPG;RBM20;KCNK3;SRPX;EFCAB10;FXYD3;PTGES;MDM2;SERPINF1;ALDH3A1;FEZ1;PVALB;SPOCK2;SULT1A1;LRRC15;MKNK2;NFATC2;ITGA3;LDB…	CDKN1A;DNAH1;SYNPO;TMBIM1;EDN2;SPNS2;FBLIM1;SSTR5;MVP;KIAA1683;SH3BP5;PTAFR;TMEM40;SULF2;SMOX;KRT83;SLC25A42;FAM65C;LTBP2;PAQR7;GATS;SHC4;STAT6;SEPT9;PSD4;ZNF469;MXD4;ABAT;CUEDC1;KANK3;CSTA;CELSR2;TRIM29;C14orf159;LOC284379;C2orf18;STEAP3;POU2F3;NTSR1;CAPN1;RAB26;AQP3;PSCA;SMAD3;CAPG;RBM20;KCNK3;SRPX;EFCAB10;FXYD3;PTGES;MDM2;SERPINF1;ALDH3A1;FEZ1;PVALB;SPOCK2;SULT1A1;LRRC15;MKNK2;NFATC2;ITGA3;LDB…	20;30;54;61;71;89;92;96;112;146;153;165;167;172;174;202;206;212;226;228;249;263;277;279;281;301;341;362;412;415;447;507;526;536;560;607;614;632;642;701;703;718;732;735;750;753;809;810;841;853;880;881;885;890;904;912;938;963;968;986;989;1057;1071;1082;1127;1150;1201;1255;1268;1279;1283;1301;1320;1336;1341;1346;1371;1387;1407;1413;1430;1448;1463;1479;1488;1492;1509;1513;1524;1605;1612;1642;1657;168…
RNAseq_upregulated_genes	85	taipale-RGGTCANNNARRGGTCA-RARA-DBD	RGGTCANNNARRGGTCA-RARA-DBD	RARA,NR1H4,NR4A1,RXRA	hg19-tss-centered-10kb-10species	0.0283539	3.05963	BAX;NTN4;LHFPL2;DUSP4;KDM6B;SYBU;CAMK2B;SYTL1;CDKL5;MCC;FXYD3;ALDH3A1;RIN2;PLCL2;RNF207;SMOX;ZNF563;KIAA1217;UGT1A6;ODZ4;ERRFI1;PAPSS2;RHCG;FSTL4;SNX29;PMEPA1;PCNXL2;KIAA1539;SSTR5;SERPINA1;CDKN1A;OPHN1;COL7A1;NR2E3;ABAT;PTAFR;SHC4;FAM65C;USP2;KDM4B;PVRL4;OCIAD2;KLHDC7A;LOC643008;SPTBN5;LRRC37A3;FILIP1L;KLF9;B4GALT1;HLA-DRB5;TSPAN1;C17orf108;PRINS;C7orf60;THNSL2;ADAMTS9;RAB37;LDB3;SLC38A7;STEAP3;…	BAX;NTN4;LHFPL2;DUSP4;KDM6B;SYBU;CAMK2B;SYTL1;CDKL5;MCC;FXYD3;ALDH3A1;RIN2;PLCL2;RNF207;SMOX;ZNF563;KIAA1217;UGT1A6;ODZ4;ERRFI1;PAPSS2;RHCG;FSTL4;SNX29;PMEPA1;PCNXL2;KIAA1539;SSTR5;SERPINA1;CDKN1A;OPHN1;COL7A1;NR2E3;ABAT;PTAFR;SHC4;FAM65C;USP2;KDM4B;PVRL4;OCIAD2;KLHDC7A;LOC643008;SPTBN5;LRRC37A3;FILIP1L;KLF9;B4GALT1;HLA-DRB5;TSPAN1;C17orf108;PRINS;C7orf60;THNSL2;ADAMTS9;RAB37;LDB3;SLC38A7;STEAP3;…	19;48;51;66;78;90;118;121;144;159;160;165;179;180;204;211;223;233;249;268;272;304;316;337;343;348;364;384;385;397;442;492;508;530;544;550;559;560;569;601;602;614;634;665;670;679;694;738;741;742;748;768;793;795;803;818;830;840;903;920;960;984;994;1013;1019;1040;1043;1070;1079;1093;1094;1097;1131;1144;1157;1162;1166;1172;1182;1186;1211;1231;1315;1319;1329;1340;1341;1360;1371;1383;1389;1425;1474;149…
RNAseq_upregulated_genes	86	taipale-NTGACCTNATNAGGTCAN-THRA-FL	NTGACCTNATNAGGTCAN-THRA-FL		hg19-tss-centered-10kb-10species	0.0283409	3.05631	KLF9;FHL2;PBXIP1;SPOCK2;SYT8;FOS;YPEL3;SYNPO;NAV2;AHNAK2;LOXL4;SAMD12;ZNF323;CALD1;TMBIM1;MKNK2;FEZ1;PAQR7;C14orf159;AQP3;PSD4;PDE4C;KDM6B;PLCL2;GADD45A;PLEKHG1;ATP10D;TEP1;RPS6KA2;CAT;GPR173;ITGA3;RNF19A;SSTR5;PIK3IP1;ALS2CL;KANK3;ANK1;RASSF2	KLF9;FHL2;PBXIP1;SPOCK2;SYT8;FOS;YPEL3;SYNPO;NAV2;AHNAK2;LOXL4;SAMD12;ZNF323;CALD1;TMBIM1;MKNK2;FEZ1;PAQR7;C14orf159;AQP3;PSD4;PDE4C;KDM6B;PLCL2;GADD45A;PLEKHG1;ATP10D;TEP1;RPS6KA2;CAT;GPR173;ITGA3;RNF19A;SSTR5;PIK3IP1;ALS2CL;KANK3;ANK1;RASSF2;CDKN1A;SPATA18;SH3TC2;FXYD3;NDRG4;NTSR1;TRAK1;C9orf9;TAGLN;AMTN;EML2;ADAMTS9;HPX;TUBA1A;PIK3R3;STEAP3;CALML5;MAP2;NEDD9;XG;KCNK3;NFATC2;TMEM40;REEP2;ARNTL;…	7;10;32;63;81;82;85;86;107;108;111;144;154;168;187;198;209;228;241;251;261;295;342;356;371;389;390;418;423;453;473;487;511;532;534;540;544;562;571;609;715;718;722;737;786;787;796;816;830;855;865;866;909;950;956;1015;1020;1026;1037;1045;1057;1083;1104;1107;1109;1144;1186;1202;1211;1272;1328;1331;1357;1365;1389;1418;1447;1468;1473;1485;1500;1510;1515;1530;1535;1538;1542;1578;1586;1594;1601;1604;160…
RNAseq_upregulated_genes	87	swissregulon-STAT1-3.p3	STAT1,STAT3	STAT6,STAT4,STAT3,STAT1,STAT5B,STAT5A,BCL6	hg19-tss-centered-10kb-10species	0.028339	3.05583	KLF9;BCL6;LHFPL2;ALPK3;ID3;EDN2;CLEC3A;CDKN1A;ODZ4;OCIAD2;C17orf103;WAS;PAPSS2;C14orf159;C1orf183;DIRC3;KIAA0513;SYBU;CAT;SGK223;SOD3;LDB3;C1QTNF6;SEPT9;C17orf108;HSPB8;WIPI1;C2orf18;ZNF323;PLA2G3;MAF;SCD5;FGF13;C1orf57;SSTR5;NUAK1	KLF9;BCL6;LHFPL2;ALPK3;ID3;EDN2;CLEC3A;CDKN1A;ODZ4;OCIAD2;C17orf103;WAS;PAPSS2;C14orf159;C1orf183;DIRC3;KIAA0513;SYBU;CAT;SGK223;SOD3;LDB3;C1QTNF6;SEPT9;C17orf108;HSPB8;WIPI1;C2orf18;ZNF323;PLA2G3;MAF;SCD5;FGF13;C1orf57;SSTR5;NUAK1;PLEKHG1;SRPX;NTSR1;STEAP3;ACP6;ATP10D;SYT8;INTU;CALCOCO1;LTBP2;ZNF225;USP2;RND3;ZNF488;DCP1B;PLEKHB1;OXTR;PLAU;SHC4;MXD4;CAPN9;LHFP;GALC;PLCL2;DUSP6;ANK3;PLD1;PCDHA10;…	3;4;36;46;59;62;89;104;121;148;163;173;184;204;243;245;260;262;263;283;328;352;363;364;365;373;379;407;408;409;411;416;435;449;470;481;533;556;559;604;674;701;724;756;778;780;781;790;806;814;815;876;925;972;977;998;1004;1048;1056;1068;1091;1108;1153;1158;1171;1180;1196;1230;1244;1291;1341;1356;1375;1398;1412;1419;1422;1465;1466;1472;1482;1492;1493;1504;1517;1608;1624;1630;1640;1694;1699;1723;1737…
RNAseq_upregulated_genes	88	transfac_pro-M02107	V$NFYC_Q5	NFYC,NFYB,NFYA	hg19-tss-centered-10kb-10species	0.0282457	3.0321	SLC25A42;TXNIP;WDR81;C17orf91;CDKN1A;ABAT;SOX9;ALDH4A1;MKNK2;MXD4;PNRC1;HLA-F;CCNG2;WBP1;ARNTL;DUSP6;SESN2;ARL15;SHC4;LMCD1;C20orf194	SLC25A42;TXNIP;WDR81;C17orf91;CDKN1A;ABAT;SOX9;ALDH4A1;MKNK2;MXD4;PNRC1;HLA-F;CCNG2;WBP1;ARNTL;DUSP6;SESN2;ARL15;SHC4;LMCD1;C20orf194;MSX2;GRHL3;KDM6B;SSTR5;BCL2L1;SLC43A2;CCNG1;WBSCR27;HIST1H3A;USP2;MAF;SESN3;ADCK3;PPP2R5B;MDM2;GLS2;ARID4A;SARDH;RPS6KA2;ACBD4;EPS8L1;NR2E3;IVD;ODZ4;CAMK1D;KDM4A;PIK3IP1;CAT;PIK3R3;KANK3;FGD3;THBS3;TMEM45B;TMEM40;SMAD3;KLF9;FAM155A;C12orf5;TP53INP1;TSPYL2;MAST4;DIX…	27;32;57;66;72;108;113;117;124;127;129;145;150;152;161;163;192;211;217;233;236;263;278;356;371;376;433;439;443;456;464;467;481;498;522;567;576;609;621;640;642;685;720;721;722;741;763;772;784;860;869;883;890;916;937;1019;1020;1037;1039;1043;1084;1099;1121;1136;1246;1247;1250;1269;1276;1289;1291;1292;1314;1318;1330;1332;1343;1345;1371;1472;1508;1521;1599;1602;1656;1677;1703;1753;1807;1809;1847;1899…
RNAseq_upregulated_genes	89	wgEncodeHaibTfbsT47dEralphaaPcr2xGen1hPkRep2.broadPeak.gz	ERalpha_a/T-47D/Genistein_100nM	ESR1	hg19-tss-centered-10kb-chip-encode-taipale-inhouse	0.049346	3.02472	SERPINA1;AGR3;FMN1;LOC401109;HSPB8;FHL2;SLC25A45;SEPT9;CCR7;SYBU;PTGES;NXNL2;NEDD9;PAPSS2;KDM4B;PGLYRP2;KRT19;PSG9;C2orf18;ABAT;SYT8;C1QTNF6;MACC1;CUEDC1;EDN1;NEAT1;GSN;SPINK4;MDM2;ZNF552;C15orf38;WISP2;CT62;SLC25A42;PPP1R3B;RPS6KA2;RNF170;KRT4;TMEM45B;RPS6KL1;NAV2;FAM198B;TRAK1;C12orf76;TNS4;CD22;FAM174B;CNTD2;RNF144B;C21orf57;CELSR2;CYFIP2;CAPN2;RBL2;ABCC2;FGD3;RLN2;PSTPIP2;FOS;B4GALT1;TSPAN1;A…	SERPINA1;AGR3;FMN1;LOC401109;HSPB8;FHL2;SLC25A45;SEPT9;CCR7;SYBU;PTGES;NXNL2;NEDD9;PAPSS2;KDM4B;PGLYRP2;KRT19;PSG9;C2orf18;ABAT;SYT8;C1QTNF6;MACC1;CUEDC1;EDN1;NEAT1;GSN;SPINK4;MDM2;ZNF552;C15orf38;WISP2;CT62;SLC25A42;PPP1R3B;RPS6KA2;RNF170;KRT4;TMEM45B;RPS6KL1;NAV2;FAM198B;TRAK1;C12orf76;TNS4;CD22;FAM174B;CNTD2;RNF144B;C21orf57;CELSR2;CYFIP2;CAPN2;RBL2;ABCC2;FGD3;RLN2;PSTPIP2;FOS;B4GALT1;TSPAN1;A…	1;12;15;20;25;42;45;51;53;54;60;71;86;96;102;112;113;116;148;155;156;169;170;171;175;186;197;202;205;209;210;240;244;245;256;283;284;288;307;309;314;333;347;349;388;412;421;422;436;445;475;478;479;483;486;493;498;529;534;535;536;543;552;559;570;608;614;618;619;620;621;627;646;664;681;727;743;753;780;784;820;901;937;938;969;980;1073;1109;1124;1134;1325;1334;1340;1355;1399;1412;1481;1494;1509;1534;…
RNAseq_upregulated_genes	90	transfac_public-M00472	V$FOXO4_01	FOXG1,FOXO3,FOXO1,FOXM1,FOXO6,FOXF2,FOXO4	hg19-tss-centered-10kb-10species	0.0282121	3.02355	NAV2;DUSP6;CDKN1A;EFCAB10;SMAD3;SSTR5;SHC4;TGFB2;ABCA1;SOX9;YPEL2;GATS;ARHGEF37;NEDD9;DDIT4;TMEM86A;BTG1;MXD1;DIRC3;C5orf41;LHFPL2;ADCK3;PRINS;TXNIP;EPAS1;TP53INP1;MBNL2;CYP4F8;CCNG2;PPM1D;ZNF323;BIK;GSN;AGR2;EOMES;DCP1B;ANK3;KIAA1370;FAM189A2;MXD4;KANK3;MAF;CYGB;KLF4;ODZ4;PHLDA1;TMEM117;GCNT2;C17orf103;LRRC37A3;TGFBI;ZFYVE1;VPS13C;MDM2;CITED2;GHR;BBC3;MTRNR2L6;C12orf5;SASH1;EIF2C4;RASSF2;LOC1001…	NAV2;DUSP6;CDKN1A;EFCAB10;SMAD3;SSTR5;SHC4;TGFB2;ABCA1;SOX9;YPEL2;GATS;ARHGEF37;NEDD9;DDIT4;TMEM86A;BTG1;MXD1;DIRC3;C5orf41;LHFPL2;ADCK3;PRINS;TXNIP;EPAS1;TP53INP1;MBNL2;CYP4F8;CCNG2;PPM1D;ZNF323;BIK;GSN;AGR2;EOMES;DCP1B;ANK3;KIAA1370;FAM189A2;MXD4;KANK3;MAF;CYGB;KLF4;ODZ4;PHLDA1;TMEM117;GCNT2;C17orf103;LRRC37A3;TGFBI;ZFYVE1;VPS13C;MDM2;CITED2;GHR;BBC3;MTRNR2L6;C12orf5;SASH1;EIF2C4;RASSF2;LOC1001…	13;56;67;82;83;87;89;105;113;118;126;188;193;205;212;222;238;240;263;264;265;273;276;292;317;332;387;392;423;449;470;533;534;536;563;565;569;571;576;579;600;607;620;669;671;686;690;692;717;721;735;767;768;774;784;786;815;827;867;872;894;911;922;947;960;984;990;998;1007;1020;1079;1094;1100;1102;1107;1113;1136;1165;1248;1261;1269;1270;1299;1326;1350;1410;1421;1439;1446;1462;1481;1486;1499;1510;1520…
RNAseq_upregulated_genes	91	wgEncodeHaibTfbsA549P300V0422111Etoh02PkRep2.broadPeak.gz	p300/A549/EtOH_0.02pct	EP300	hg19-tss-centered-10kb-chip-encode-taipale-inhouse	0.0493218	3.02221	CAPG;SEPT9;FLJ35776;ID3;NEAT1;ABCC3;UGT1A6;GDF15;NCRNA00173;MYEOV;ERRFI1;ELF3;CYP24A1;SMAD3;ALDH3A1;ABCC2;DDIT4;C1QTNF6;HIST2H2BE;MYOF;GPRC5A;MALAT1;HIST1H2BC;BCL2L1;HIST1H4H;SPINK4;CLU;COL7A1;NR2E3;SYNPO;CAPN2;KLF9;SLC25A45;KRT80;C17orf91;WDR81;BCAS1;SLC26A2;PLAU;BBC3;RAB26;RHCG;AHNAK2;RIN2;TGFBI;EDN1;ST3GAL5;LIF;B4GALT1;FAM65C;STOM;COL16A1;ALOXE3;POLD4;HES1;ASB9;WISP2;TMC7;DKK1	CAPG;SEPT9;FLJ35776;ID3;NEAT1;ABCC3;UGT1A6;GDF15;NCRNA00173;MYEOV;ERRFI1;ELF3;CYP24A1;SMAD3;ALDH3A1;ABCC2;DDIT4;C1QTNF6;HIST2H2BE;MYOF;GPRC5A;MALAT1;HIST1H2BC;BCL2L1;HIST1H4H;SPINK4;CLU;COL7A1;NR2E3;SYNPO;CAPN2;KLF9;SLC25A45;KRT80;C17orf91;WDR81;BCAS1;SLC26A2;PLAU;BBC3;RAB26;RHCG;AHNAK2;RIN2;TGFBI;EDN1;ST3GAL5;LIF;B4GALT1;FAM65C;STOM;COL16A1;ALOXE3;POLD4;HES1;ASB9;WISP2;TMC7;DKK1;ANXA4;TNS4;CCND1…	4;6;19;26;31;33;37;53;56;63;67;70;82;88;89;91;95;96;104;127;128;134;140;142;144;145;159;169;171;180;194;202;214;221;276;277;288;298;299;302;355;356;365;367;399;400;405;432;452;466;472;473;483;489;490;493;500;501;502;526;537;560;594;598;599;656;672;682;698;699;741;790;803;812;822;837;854;892;963;968;986;990;991;993;1028;1029;1033;1046;1071;1092;1113;1120;1121;1133;1163;1181;1204;1219;1242;1265;130…
RNAseq_upregulated_genes	92	swissregulon-AR.p2	AR	NR3C1,AR,PGR	hg19-tss-centered-10kb-10species	0.0281729	3.01359	CDKN1A;DUSP6;C21orf63;SLC7A8;KLF9;MXD4;KANK3;IQSEC2;MED23;SYTL5;FILIP1L;TMEM229B;LHFPL2;CPEB4;NAV2;FBLIM1;SMAD3;USP2;ARNTL;C5orf41;LOC284379;KIAA1217;ARL15;PRRG1;ZNF20;SYTL2;UCP2;FEZ1;SYT8;MDM2;GCNT2;LCAT;FIBCD1;PDK4;TXNIP;EDN1;C17orf108;SOX9;SSTR5;C13orf18;SYNPO;CA5B;NEDD9;KRT16;RAB5B;BCL6;EFCAB10;CDSN;DIXDC1;ZNF488;KIAA0513;RNF144B;GATS;EDN2;CAPN1;PIK3IP1;SERPINF1;SHC4;SERPINA1;RHOQ;A2LD1;MAF;C…	CDKN1A;DUSP6;C21orf63;SLC7A8;KLF9;MXD4;KANK3;IQSEC2;MED23;SYTL5;FILIP1L;TMEM229B;LHFPL2;CPEB4;NAV2;FBLIM1;SMAD3;USP2;ARNTL;C5orf41;LOC284379;KIAA1217;ARL15;PRRG1;ZNF20;SYTL2;UCP2;FEZ1;SYT8;MDM2;GCNT2;LCAT;FIBCD1;PDK4;TXNIP;EDN1;C17orf108;SOX9;SSTR5;C13orf18;SYNPO;CA5B;NEDD9;KRT16;RAB5B;BCL6;EFCAB10;CDSN;DIXDC1;ZNF488;KIAA0513;RNF144B;GATS;EDN2;CAPN1;PIK3IP1;SERPINF1;SHC4;SERPINA1;RHOQ;A2LD1;MAF;C…	2;14;19;25;27;33;38;43;52;75;79;83;103;115;177;225;227;245;263;334;364;371;377;393;403;418;432;441;447;456;459;464;482;526;531;539;571;584;596;672;709;727;733;761;771;807;811;824;828;833;836;858;879;912;924;933;938;940;979;994;1004;1037;1072;1076;1080;1112;1118;1132;1149;1154;1157;1183;1198;1201;1205;1222;1248;1279;1296;1329;1355;1366;1384;1411;1498;1507;1508;1526;1535;1539;1562;1564;1643;1702;17…
RNAseq_upregulated_genes	93	transfac_public-M00517	V$AP1_01	BATF,SPI1,FOS,BACH2,FOSB,JUNB,JUN,JUND,MAFK,JDP2,ARNT,FOSL1,NFE2,FOSL2,MAFA,BACH1	hg19-tss-centered-10kb-10species	0.0281468	3.00694	RGS20;FGF13;RHOC;CDKN1A;KIAA0513;GADD45A;EFCAB10;KRT16;SSTR5;FOSL1;SHC4;KDM6B;AHNAK2;PCNXL2;FHL2;PROM2;LRRC37A3;KCNK3;RAB5B;OCIAD2;COL7A1;CLU;SEPT9;CAPN2;CMBL;PRSS22;LMCD1;BMP1;WDR63;NR2E3;YPEL3;LIF;LAMB3;UGT1A6;GRIK5;BTG1;USP2;MDM2;MACC1;ITGA3;NAV2;MAST4;KRT19;FAM189A2;ATP10D;ODZ4;CYP4F8;AGR2;TMEM40;KCNF1;RHOQ;GCNT4;ZNF323;PCDHA10;KIAA1539;APOD;NFATC2;ANKRD22;GPR115;YPEL5;SLC25A45;ANK3;SLC16A4;T…	RGS20;FGF13;RHOC;CDKN1A;KIAA0513;GADD45A;EFCAB10;KRT16;SSTR5;FOSL1;SHC4;KDM6B;AHNAK2;PCNXL2;FHL2;PROM2;LRRC37A3;KCNK3;RAB5B;OCIAD2;COL7A1;CLU;SEPT9;CAPN2;CMBL;PRSS22;LMCD1;BMP1;WDR63;NR2E3;YPEL3;LIF;LAMB3;UGT1A6;GRIK5;BTG1;USP2;MDM2;MACC1;ITGA3;NAV2;MAST4;KRT19;FAM189A2;ATP10D;ODZ4;CYP4F8;AGR2;TMEM40;KCNF1;RHOQ;GCNT4;ZNF323;PCDHA10;KIAA1539;APOD;NFATC2;ANKRD22;GPR115;YPEL5;SLC25A45;ANK3;SLC16A4;T…	2;10;35;39;41;65;71;78;87;89;98;139;165;171;175;178;198;207;222;231;288;293;311;329;343;365;381;393;470;495;534;535;542;543;547;557;573;590;663;664;670;719;748;769;789;806;810;815;841;852;861;867;875;878;899;901;913;921;986;992;1003;1032;1034;1052;1071;1079;1098;1129;1153;1167;1229;1236;1245;1250;1277;1336;1365;1368;1378;1388;1400;1410;1446;1452;1465;1486;1489;1493;1506;1519;1521;1526;1569;1575;1…
RNAseq_downregulated_genes	1	transfac_pro-M00920	V$E2F_Q6_01	E2F7,E2F5,E2F4,E2F3,E2F2,E2F1,TFDP3,TFDP1	hg19-tss-centered-10kb-10species	0.0778511	12.5589	E2F2;UHRF1;MCM6;E2F1;RRM2;HIST1H3G;CHAF1A;CDC6;MCM5;UNG;MCM2;CDC25A;MCM7;POLA1;RBL1;PKMYT1;E2F8;DTL;MCM4;PRKDC;HMGN2;DHFR;PHF17;H2AFZ;RANBP1;DNMT1;MCM3;IRX4;TIPIN;C12orf34;FBXO5;KIF15;CCDC109B;CASP8AP2;CHEK1;PIM1;POLE;ZNF367;ZIC5;STMN1;MCM10;WRAP53;EZH2;TUBA1B;DMC1;GINS1;ATAD5;LOC254559;TUBB;NASP;CDC45;TOPBP1;KNTC1;LSM6;HELLS;DPYSL2;ZNF232;DUSP9;HMGB2;RFWD3;SASS6;MXD3;CDC25B;GMNN;WDR76;CDT1;TP73;…	E2F2;UHRF1;MCM6;E2F1;RRM2;HIST1H3G;CHAF1A;CDC6;MCM5;UNG;MCM2;CDC25A;MCM7;POLA1;RBL1;PKMYT1;E2F8;DTL;MCM4;PRKDC;HMGN2;DHFR;PHF17;H2AFZ;RANBP1;DNMT1;MCM3;IRX4;TIPIN;C12orf34;FBXO5;KIF15;CCDC109B;CASP8AP2;CHEK1;PIM1;POLE;ZNF367;ZIC5;STMN1;MCM10;WRAP53;EZH2;TUBA1B;DMC1;GINS1;ATAD5;LOC254559;TUBB;NASP;CDC45;TOPBP1;KNTC1;LSM6;HELLS;DPYSL2;ZNF232;DUSP9;HMGB2;RFWD3;SASS6;MXD3;CDC25B;GMNN;WDR76;CDT1;TP73;…	3;4;5;7;8;10;13;14;15;18;19;20;22;24;27;31;37;38;39;41;46;48;54;56;65;73;74;82;90;95;97;98;101;107;112;117;120;128;130;137;150;152;153;155;166;169;170;181;186;192;199;200;217;222;228;230;231;235;238;240;242;252;306;308;332;333;341;342;344;357;364;391;400;405;406;413;421;426;452;456;468;517;561;574;591;598;606;611;635;639;658;659;674;676;678;707;712;735;747;753;755;804;805;814;900;904;915;930;931;…
RNAseq_downregulated_genes	2	wgEncodeSydhTfbsHelas3E2f4StdPk.narrowPeak.gz	E2F4/HeLa-S3/None	E2F4	hg19-tss-centered-10kb-chip-encode-taipale-inhouse	0.198673	11.7732	LOC642846;SPC25;SKA1;XRCC2;DIAPH3;KIF24;KIF20A;RFC3;ESCO2;CENPW;KIF2C;NUF2;RRM1;C19orf40;CDC25C;C1orf112;AURKB;SGOL1;ZWINT;BRIP1;MAD2L1;MCM3;DNA2;PBK;CDC7;STIL;RIBC2;CENPI;NDC80;UBE2T;TIMELESS;METTL4;ATAD5;FANCD2;HMGB1;ARHGAP11A;NEIL3;KIF18B;HSPA2;CDCA5;ITGB3BP;NCAPH;ATAD2;KIF15;CIT;PLK1;C14orf145;CDKN2D;RFC4;TK1;ASPM;CDC45;NEK2;SPC24;FOXM1;CDK1;TUBB;LIN52;MASTL;CKS1B;RIF1;KIF4A;RAD54B;MELK;GTSE1…	LOC642846;SPC25;SKA1;XRCC2;DIAPH3;KIF24;KIF20A;RFC3;ESCO2;CENPW;KIF2C;NUF2;RRM1;C19orf40;CDC25C;C1orf112;AURKB;SGOL1;ZWINT;BRIP1;MAD2L1;MCM3;DNA2;PBK;CDC7;STIL;RIBC2;CENPI;NDC80;UBE2T;TIMELESS;METTL4;ATAD5;FANCD2;HMGB1;ARHGAP11A;NEIL3;KIF18B;HSPA2;CDCA5;ITGB3BP;NCAPH;ATAD2;KIF15;CIT;PLK1;C14orf145;CDKN2D;RFC4;TK1;ASPM;CDC45;NEK2;SPC24;FOXM1;CDK1;TUBB;LIN52;MASTL;CKS1B;RIF1;KIF4A;RAD54B;MELK;GTSE1…	1;4;6;8;9;11;13;15;17;19;21;22;24;25;26;27;28;29;32;34;36;37;40;41;42;44;45;48;53;55;58;59;60;62;63;64;66;68;71;73;74;75;76;79;80;83;84;86;88;90;91;92;98;99;103;104;105;108;109;111;114;115;119;123;126;127;128;129;133;135;136;141;143;144;145;146;151;152;153;157;160;161;164;165;168;169;170;174;176;178;179;180;181;184;186;187;188;189;191;192;193;196;198;199;200;202;204;206;209;210;211;212;213;216;21…
RNAseq_downregulated_genes	3	homer-M00028	E2F(E2F)/Cell-Cycle-Exp/Homer	E2F7,E2F5,E2F4,E2F3,E2F2,E2F1,TFDP3,TFDP1	hg19-tss-centered-10kb-10species	0.0735316	11.6743	UNG;MCM3;E2F1;RRM2;MCM6;MCM5;E2F2;C12orf34;MCM2;MCM4;PRKDC;UHRF1;TOPBP1;CDC25A;RANBP1;CHEK1;ZNF232;MCM7;HIST1H3G;DHFR;FANCC;HMGN2;KNTC1;PKMYT1;DNMT1;E2F8;LIN52;CDC6;HELLS;NASP;CHAF1A;MXD3;CDC25B;PHF17;IRX4;ATAD5;TUBA1B;CDCA7;PIM1;DLEU2;C4orf21;GINS2;LOC254559;STMN1;CASP8AP2;GINS1;RFC3;CDT1;PSMC3IP;CENPH;KIAA1274;TIMELESS;CCDC99;PHF19;CCDC109B;HIST1H2BJ;DMC1;H1F0;HMGB2;TIPIN;RFWD3;DCLRE1A;POLA1;LS…	UNG;MCM3;E2F1;RRM2;MCM6;MCM5;E2F2;C12orf34;MCM2;MCM4;PRKDC;UHRF1;TOPBP1;CDC25A;RANBP1;CHEK1;ZNF232;MCM7;HIST1H3G;DHFR;FANCC;HMGN2;KNTC1;PKMYT1;DNMT1;E2F8;LIN52;CDC6;HELLS;NASP;CHAF1A;MXD3;CDC25B;PHF17;IRX4;ATAD5;TUBA1B;CDCA7;PIM1;DLEU2;C4orf21;GINS2;LOC254559;STMN1;CASP8AP2;GINS1;RFC3;CDT1;PSMC3IP;CENPH;KIAA1274;TIMELESS;CCDC99;PHF19;CCDC109B;HIST1H2BJ;DMC1;H1F0;HMGB2;TIPIN;RFWD3;DCLRE1A;POLA1;LS…	3;4;5;7;9;11;12;13;14;15;16;17;22;23;24;27;32;33;39;44;45;47;49;52;54;67;70;71;72;83;85;92;94;101;111;116;118;123;130;137;155;156;170;179;183;191;192;208;233;239;241;245;252;253;270;278;282;291;296;315;331;334;348;358;359;370;373;407;417;432;457;465;471;476;480;493;532;541;555;559;567;571;579;586;591;599;614;629;636;655;656;682;691;709;739;740;744;746;753;760;780;781;790;810;839;848;880;915;938;9…
RNAseq_downregulated_genes	4	transfac_public-M00516	V$E2F_03	E2F7,E2F5,E2F4,E2F3,E2F2,E2F1,TFDP3,TFDP1	hg19-tss-centered-10kb-10species	0.0725957	11.4826	RRM2;UNG;E2F1;MCM6;MCM5;CDC25A;E2F2;MCM2;MCM4;PRKDC;PHF17;UHRF1;ZNF367;MCM7;C12orf34;GINS1;E2F8;CDC6;POLA1;DHFR;HIST1H3G;DNMT1;NASP;DMC1;TOPBP1;RBL1;CASP8AP2;CHAF1A;CHEK1;TIPIN;DTL;MCM3;KNTC1;RANBP1;TUBA1B;PIM1;IRX4;HMGN2;PKMYT1;HIST1H2BJ;MXD3;ZIC5;KIF15;CCDC109B;H2AFZ;RAD51;TP73;HAUS7;HMGB2;FBXO5;ORC1;ZNF232;GPR19;SMC3;DPYSL2;HSPA12A;TUBB;DLEU2;HELLS;GAS2L3;MCM10;RFWD3;ATAD5;POLE;EXOSC2;DUSP9;C1…	RRM2;UNG;E2F1;MCM6;MCM5;CDC25A;E2F2;MCM2;MCM4;PRKDC;PHF17;UHRF1;ZNF367;MCM7;C12orf34;GINS1;E2F8;CDC6;POLA1;DHFR;HIST1H3G;DNMT1;NASP;DMC1;TOPBP1;RBL1;CASP8AP2;CHAF1A;CHEK1;TIPIN;DTL;MCM3;KNTC1;RANBP1;TUBA1B;PIM1;IRX4;HMGN2;PKMYT1;HIST1H2BJ;MXD3;ZIC5;KIF15;CCDC109B;H2AFZ;RAD51;TP73;HAUS7;HMGB2;FBXO5;ORC1;ZNF232;GPR19;SMC3;DPYSL2;HSPA12A;TUBB;DLEU2;HELLS;GAS2L3;MCM10;RFWD3;ATAD5;POLE;EXOSC2;DUSP9;C1…	3;4;5;6;7;8;9;10;12;13;14;15;20;23;25;26;27;29;33;35;38;43;45;50;51;56;60;63;64;66;78;79;94;100;102;105;111;118;123;126;129;134;135;137;192;196;199;206;214;244;262;270;275;283;288;301;314;315;331;333;342;344;348;366;370;375;396;428;436;451;453;454;463;498;536;562;563;565;566;571;573;593;599;612;627;628;634;642;662;678;679;683;701;729;775;777;821;827;855;868;908;930;936;979;986;998;1034;1060;1062;…
RNAseq_downregulated_genes	5	transfac_pro-M00919	V$E2F_Q4_01	E2F7,E2F5,E2F4,E2F3,E2F2,E2F1,TFDP3,TFDP1	hg19-tss-centered-10kb-10species	0.0713851	11.2347	E2F2;UHRF1;MCM6;CDC6;E2F1;HIST1H3G;CHAF1A;DHFR;MCM5;RRM2;HMGN2;PKMYT1;UNG;E2F8;MCM2;RBL1;MCM3;DTL;MCM4;PRKDC;CDC25A;STMN1;EZH2;MCM7;KIF15;PHF17;RANBP1;FBXO5;CCDC109B;H2AFZ;HELLS;ZIC5;POLA1;ZNF367;SLBP;MCM10;IRX4;DNMT1;CHEK1;C12orf34;ZNF232;FANCC;TUBB;CDC45;TUBA1B;KIAA1274;NASP;KNTC1;MXD3;PIM1;ATAD5;LOC254559;SASS6;PAQR4;POLE;BRI3BP;DLEU2;DCLRE1A;LMNB1;HSPA12A;TIPIN;GINS1;MIR17HG;CASP8AP2;DUSP9;HM…	E2F2;UHRF1;MCM6;CDC6;E2F1;HIST1H3G;CHAF1A;DHFR;MCM5;RRM2;HMGN2;PKMYT1;UNG;E2F8;MCM2;RBL1;MCM3;DTL;MCM4;PRKDC;CDC25A;STMN1;EZH2;MCM7;KIF15;PHF17;RANBP1;FBXO5;CCDC109B;H2AFZ;HELLS;ZIC5;POLA1;ZNF367;SLBP;MCM10;IRX4;DNMT1;CHEK1;C12orf34;ZNF232;FANCC;TUBB;CDC45;TUBA1B;KIAA1274;NASP;KNTC1;MXD3;PIM1;ATAD5;LOC254559;SASS6;PAQR4;POLE;BRI3BP;DLEU2;DCLRE1A;LMNB1;HSPA12A;TIPIN;GINS1;MIR17HG;CASP8AP2;DUSP9;HM…	3;4;5;6;8;10;12;17;19;20;23;24;27;29;31;33;38;40;47;48;50;52;56;57;59;62;64;74;76;88;95;121;123;125;129;135;138;139;144;145;146;179;187;190;195;207;210;213;225;232;235;245;247;254;264;290;305;308;317;320;324;345;357;362;381;400;410;411;465;472;488;509;514;521;522;523;527;528;532;549;555;566;624;631;636;657;662;664;681;689;694;698;733;738;748;773;804;850;861;878;888;907;910;913;915;944;979;1020;10…
RNAseq_downregulated_genes	6	homer-M00032	E2F7(E2F)/Hela-E2F7-ChIP-Seq(GSE32673)/Homer	E2F7,E2F6,E2F4,E2F1	hg19-tss-centered-10kb-10species	0.0708869	11.1327	ZNF367;MCM3;TUBA1B;UHRF1;E2F8;NOLC1;MCM4;PRKDC;MCM6;FBXO5;SSRP1;FANCC;PIM1;TIMELESS;RANBP1;ATAD2;MCM7;NASP;TYRO3;KIAA0101;DCLRE1A;KNTC1;GINS2;DHFR;CENPH;USP37;MSH5;HIST1H3G;LOC100128191;TMPO;CASP8AP2;EZH2;CDT1;RFWD3;PSMC3IP;ATAD5;MCM5;MXD3;ANKRD32;GPRIN1;TFAP4;CCDC109B;KIAA1274;HELLS;KLF11;CDCA7;SLBP;DUSP9;JAG2;RBL1;CHEK1;LIN52;ZNF232;WDR76;MCM2;MYBL2;RIF1;LHX2;C1orf135;LMNB1;LHX4;GINS3;E2F2;TOPB…	ZNF367;MCM3;TUBA1B;UHRF1;E2F8;NOLC1;MCM4;PRKDC;MCM6;FBXO5;SSRP1;FANCC;PIM1;TIMELESS;RANBP1;ATAD2;MCM7;NASP;TYRO3;KIAA0101;DCLRE1A;KNTC1;GINS2;DHFR;CENPH;USP37;MSH5;HIST1H3G;LOC100128191;TMPO;CASP8AP2;EZH2;CDT1;RFWD3;PSMC3IP;ATAD5;MCM5;MXD3;ANKRD32;GPRIN1;TFAP4;CCDC109B;KIAA1274;HELLS;KLF11;CDCA7;SLBP;DUSP9;JAG2;RBL1;CHEK1;LIN52;ZNF232;WDR76;MCM2;MYBL2;RIF1;LHX2;C1orf135;LMNB1;LHX4;GINS3;E2F2;TOPB…	2;4;6;8;9;12;17;18;24;28;35;37;42;47;48;54;63;80;81;84;86;92;96;100;104;108;110;115;118;120;131;135;139;141;142;148;153;172;175;176;179;194;207;218;219;222;229;232;233;240;242;257;262;265;272;300;319;329;338;345;357;361;370;373;383;386;393;418;422;424;465;469;473;482;491;496;504;511;514;518;524;551;558;559;561;577;580;617;626;628;631;653;660;666;684;687;692;701;705;713;753;757;762;769;770;778;786…
RNAseq_downregulated_genes	7	jaspar-PF0069.1	SGCGSSAAA	E2F7,E2F6,E2F4,E2F1	hg19-tss-centered-10kb-10species	0.0696422	10.8778	ZNF367;MCM3;UHRF1;E2F8;RRM2;MCM6;RANBP1;LIN52;NASP;NOLC1;MCM7;E2F1;FANCC;CDCA7;GINS2;PRKDC;HIST1H3G;MCM4;RBL1;ANKRD32;TIMELESS;TYRO3;TOPBP1;PSMC3IP;TFAP4;DEK;HNRNPD;ARL6IP6;CDC6;LSM6;PHF17;ATAD5;USP37;KDELC2;GINS3;SSRP1;MCM5;LHX2;FAM161A;DLEU2;UNG;FBXO5;HIST1H2BJ;CDT1;PIM1;JAG2;DLL1;WDR76;POLD3;MCM2;MSH5;POLA1;FANCD2;C2CD4C;CLSPN;LIN54;GAS2L3;KIAA0101;CHEK1;FKBP5;DUT;FANCG;NUP62CL;GEN1;CDC25A;WDR…	ZNF367;MCM3;UHRF1;E2F8;RRM2;MCM6;RANBP1;LIN52;NASP;NOLC1;MCM7;E2F1;FANCC;CDCA7;GINS2;PRKDC;HIST1H3G;MCM4;RBL1;ANKRD32;TIMELESS;TYRO3;TOPBP1;PSMC3IP;TFAP4;DEK;HNRNPD;ARL6IP6;CDC6;LSM6;PHF17;ATAD5;USP37;KDELC2;GINS3;SSRP1;MCM5;LHX2;FAM161A;DLEU2;UNG;FBXO5;HIST1H2BJ;CDT1;PIM1;JAG2;DLL1;WDR76;POLD3;MCM2;MSH5;POLA1;FANCD2;C2CD4C;CLSPN;LIN54;GAS2L3;KIAA0101;CHEK1;FKBP5;DUT;FANCG;NUP62CL;GEN1;CDC25A;WDR…	2;3;4;6;7;9;14;21;22;25;30;40;50;53;57;60;61;62;65;66;75;81;82;87;89;93;119;122;124;126;131;136;141;144;157;162;169;172;175;189;215;222;231;245;249;261;262;264;275;303;305;313;336;339;348;351;353;366;369;372;387;389;400;411;421;428;432;443;447;450;453;467;474;504;509;511;516;518;519;521;522;529;530;537;540;554;555;563;566;578;581;606;612;613;629;644;661;689;741;748;767;783;784;785;787;788;789;792…
RNAseq_downregulated_genes	8	GSM1208691_batch1_chrom1_LoVo_TFDP1_PassedQC_peaks_hg19	TFDP1/Lovo	TFDP1	hg19-tss-centered-10kb-chip-encode-taipale-inhouse	0.177214	10.3508	HIRIP3;ITGB3BP;PRR11;MDM1;MMS22L;BRCA1;CDK1;UNG;MCM5;NDC80;OIP5;KIF23;BRCA2;PRC1;CKAP2L;CDCA2;EXO1;CENPK;RFC5;NEK2;LOC81691;FANCD2;HMGB1;CDC25A;TTF2;CHEK1;KIF18B;CDKN2D;FBXO5;PLK4;RFC4;H2AFX;SKA1;HMGB2;USP37;CDC7;RFWD3;DDX12;CKLF;RRM2;TOP2A;FEN1;FANCI;KIF24;METTL4;CIT;MCM6;PIGW;CBX5;USP1;CENPM;RBL1;INCENP;CDCA8;DDX11;ANP32E;MNS1;CDC6;WDR62;AURKB;MTHFD1;DNA2;PPIL5;ZWINT;NUF2;CDCA5;IQGAP3;DIAPH3;MC…	HIRIP3;ITGB3BP;PRR11;MDM1;MMS22L;BRCA1;CDK1;UNG;MCM5;NDC80;OIP5;KIF23;BRCA2;PRC1;CKAP2L;CDCA2;EXO1;CENPK;RFC5;NEK2;LOC81691;FANCD2;HMGB1;CDC25A;TTF2;CHEK1;KIF18B;CDKN2D;FBXO5;PLK4;RFC4;H2AFX;SKA1;HMGB2;USP37;CDC7;RFWD3;DDX12;CKLF;RRM2;TOP2A;FEN1;FANCI;KIF24;METTL4;CIT;MCM6;PIGW;CBX5;USP1;CENPM;RBL1;INCENP;CDCA8;DDX11;ANP32E;MNS1;CDC6;WDR62;AURKB;MTHFD1;DNA2;PPIL5;ZWINT;NUF2;CDCA5;IQGAP3;DIAPH3;MC…	4;6;11;14;16;17;21;22;26;27;29;32;34;37;38;40;43;44;48;49;50;51;52;53;55;58;59;63;66;68;69;70;73;74;75;76;79;80;82;83;84;85;86;91;92;93;94;95;96;103;104;105;106;107;109;111;113;117;118;119;120;127;128;129;130;131;133;134;136;140;141;143;144;147;148;149;151;152;155;157;159;161;162;163;164;165;167;169;177;179;181;182;184;185;186;187;189;191;192;193;194;196;197;199;200;202;203;204;205;206;212;216;21…
RNAseq_downregulated_genes	9	transfac_pro-M00939	V$E2F1_Q4_01	E2F7,E2F5,E2F4,E2F3,E2F2,E2F1,TFDP3,TFDP1	hg19-tss-centered-10kb-10species	0.0651333	9.95439	E2F2;RBL1;E2F1;MCM6;UHRF1;DTL;DHFR;E2F8;CDC6;HIST1H3G;RRM2;ZNF367;POLA1;MCM2;CCDC109B;KIF15;MCM8;MCM3;MCM5;FBXO5;CHAF1A;RANBP1;PHF17;CDC25A;CDK1;MCM7;ATAD5;DUSP9;IRX4;PIM1;ZNF232;EZH2;POLE;MCM10;H2AFZ;PAQR4;KIAA0101;MCM4;RFWD3;STMN1;PRKDC;SKP2;LMNB1;BRI3BP;HMGN2;HELLS;ZIC5;TUBB;FZD8;PKMYT1;UNG;KNTC1;DIAPH3;FAM161A;BEND3;TUBA1B;NASP;CDT1;ATAD2;KIAA1274;DNMT1;DCK;HSPA12A;SASS6;JPH1;MMP16;CLSPN;HIST…	E2F2;RBL1;E2F1;MCM6;UHRF1;DTL;DHFR;E2F8;CDC6;HIST1H3G;RRM2;ZNF367;POLA1;MCM2;CCDC109B;KIF15;MCM8;MCM3;MCM5;FBXO5;CHAF1A;RANBP1;PHF17;CDC25A;CDK1;MCM7;ATAD5;DUSP9;IRX4;PIM1;ZNF232;EZH2;POLE;MCM10;H2AFZ;PAQR4;KIAA0101;MCM4;RFWD3;STMN1;PRKDC;SKP2;LMNB1;BRI3BP;HMGN2;HELLS;ZIC5;TUBB;FZD8;PKMYT1;UNG;KNTC1;DIAPH3;FAM161A;BEND3;TUBA1B;NASP;CDT1;ATAD2;KIAA1274;DNMT1;DCK;HSPA12A;SASS6;JPH1;MMP16;CLSPN;HIST…	3;5;6;7;11;12;13;14;16;18;24;25;31;56;64;65;77;78;84;90;95;96;97;113;114;118;133;134;142;148;149;150;151;153;163;183;194;199;201;202;203;206;215;219;222;233;237;240;254;255;274;276;279;289;293;301;314;324;338;344;372;373;374;393;411;424;446;460;466;481;505;508;560;592;622;630;643;694;701;755;764;780;783;789;824;828;838;844;866;880;893;894;904;919;948;980;998;1007;1013;1032;1044;1056;1082;1099;110…
RNAseq_downregulated_genes	10	transfac_pro-M00738	V$E2F4DP1_01	E2F7,E2F5,E2F4,E2F3,E2F2,E2F1,TFDP3,TFDP1	hg19-tss-centered-10kb-10species	0.0648396	9.89425	RBL1;ZNF367;E2F2;MCM6;MCM3;RRM2;E2F1;E2F8;UHRF1;DTL;CDC6;NASP;PHF17;TOPBP1;HELLS;ATAD5;CDC25A;KIF15;HIST1H2BJ;PIM1;MCM2;HIST1H3G;TUBA1B;MCM8;EZH2;DPYSL2;DNMT1;FZD8;FBXO5;POLA1;MCM7;DMC1;H2AFZ;LHX2;PPIL5;DHFR;RANBP1;GINS1;PAQR4;CLSPN;IRX4;CDCA7;ZNF232;UNG;ZNF850;POLE;FAM161A;CCDC109B;NPR3;CDT1;DLL1;DLEU2;MCM5;SASS6;MXD3;TRIM59;ATAD2;ARHGAP11A;PKMYT1;SKP2;CACYBP;GEN1;HSPA12A;CASC5;TIPIN;CHAF1A;STMN…	RBL1;ZNF367;E2F2;MCM6;MCM3;RRM2;E2F1;E2F8;UHRF1;DTL;CDC6;NASP;PHF17;TOPBP1;HELLS;ATAD5;CDC25A;KIF15;HIST1H2BJ;PIM1;MCM2;HIST1H3G;TUBA1B;MCM8;EZH2;DPYSL2;DNMT1;FZD8;FBXO5;POLA1;MCM7;DMC1;H2AFZ;LHX2;PPIL5;DHFR;RANBP1;GINS1;PAQR4;CLSPN;IRX4;CDCA7;ZNF232;UNG;ZNF850;POLE;FAM161A;CCDC109B;NPR3;CDT1;DLL1;DLEU2;MCM5;SASS6;MXD3;TRIM59;ATAD2;ARHGAP11A;PKMYT1;SKP2;CACYBP;GEN1;HSPA12A;CASC5;TIPIN;CHAF1A;STMN…	2;3;5;6;9;11;15;17;18;27;31;36;37;43;44;54;59;60;62;65;72;89;90;93;100;104;108;121;125;128;135;152;168;170;176;177;178;182;187;194;198;212;213;227;239;244;252;257;276;285;288;298;302;304;325;334;337;350;361;364;368;393;420;423;435;450;464;497;502;505;506;523;550;571;574;582;621;632;679;715;718;729;736;760;765;776;778;789;795;845;852;888;892;908;910;920;949;994;1014;1047;1049;1077;1083;1085;1106;1…
RNAseq_downregulated_genes	11	wgEncodeSydhTfbsK562E2f4UcdPk.narrowPeak.gz	E2F4/K562/None	E2F4	hg19-tss-centered-10kb-chip-encode-taipale-inhouse	0.168087	9.74582	DIAPH3;RFC3;SKA3;HMGB1;FOXM1;C13orf34;MZT1;C12orf32;TFDP1;MCM7;NCAPG2;BIRC5;CENPJ;HAUS7;WHSC1;TK1;NEIL3;CEP55;SLBP;NCAPG;FANCB;IQGAP3;MKI67;C14orf106;TRIP13;UNG;GINS2;NOLC1;TACC3;CDCA4;EZH2;CDT1;BRCA2;MND1;GSG2;SKA1;RRM2;KIF24;KIF15;MCM2;C9orf100;RECQL4;USP37;AURKB;DEK;BUB1B;ANLN;SHCBP1;WDR76;ZWINT;POLD3;RFC2;WDR67;CENPI;SUV39H2;CDCA5;UBE2T;KLF11;CDK1;DUT;XRCC3;MASTL;DDX12;TRIM59;CHTF18;NUF2;DTYM…	DIAPH3;RFC3;SKA3;HMGB1;FOXM1;C13orf34;MZT1;C12orf32;TFDP1;MCM7;NCAPG2;BIRC5;CENPJ;HAUS7;WHSC1;TK1;NEIL3;CEP55;SLBP;NCAPG;FANCB;IQGAP3;MKI67;C14orf106;TRIP13;UNG;GINS2;NOLC1;TACC3;CDCA4;EZH2;CDT1;BRCA2;MND1;GSG2;SKA1;RRM2;KIF24;KIF15;MCM2;C9orf100;RECQL4;USP37;AURKB;DEK;BUB1B;ANLN;SHCBP1;WDR76;ZWINT;POLD3;RFC2;WDR67;CENPI;SUV39H2;CDCA5;UBE2T;KLF11;CDK1;DUT;XRCC3;MASTL;DDX12;TRIM59;CHTF18;NUF2;DTYM…	1;3;4;6;7;8;9;10;13;15;16;17;18;20;21;23;26;27;28;31;33;35;36;37;40;43;46;48;52;53;55;60;62;63;64;67;69;70;73;74;80;81;85;87;90;91;94;97;99;100;102;104;105;110;113;115;116;119;122;126;127;131;134;135;136;137;139;140;143;144;148;149;150;154;158;161;165;169;170;173;176;177;180;183;185;187;189;190;191;192;196;201;202;203;208;212;214;217;219;221;227;232;233;235;239;242;246;249;250;251;252;256;257;261…
RNAseq_downregulated_genes	12	transfac_pro-M00740	V$E2F1DP1RB_01	E2F7,E2F5,E2F4,E2F3,E2F2,E2F1,TFDP3,TFDP1	hg19-tss-centered-10kb-10species	0.0640098	9.72431	RBL1;E2F2;MCM6;ZNF367;E2F1;RRM2;MCM3;DTL;CDC6;E2F8;UHRF1;KIF15;CDC25A;PHF17;TOPBP1;NASP;HELLS;HIST1H2BJ;RANBP1;ATAD5;PIM1;EZH2;MCM2;MCM7;MCM8;DPYSL2;DNMT1;FBXO5;POLA1;TUBA1B;DMC1;HIST1H3G;H2AFZ;DHFR;FZD8;CHAF1A;UNG;PPIL5;IRX4;GINS1;PAQR4;CLSPN;POLE;SKP2;CCDC109B;ATAD2;ZNF232;CDT1;FAM161A;SASS6;CDCA7;DLEU2;MXD3;TRIM59;MCM5;ARHGAP11A;NPR3;PKMYT1;STMN1;ZNF850;LHX2;CACYBP;ZIC5;HSPA12A;MCM10;GEN1;MCM4…	RBL1;E2F2;MCM6;ZNF367;E2F1;RRM2;MCM3;DTL;CDC6;E2F8;UHRF1;KIF15;CDC25A;PHF17;TOPBP1;NASP;HELLS;HIST1H2BJ;RANBP1;ATAD5;PIM1;EZH2;MCM2;MCM7;MCM8;DPYSL2;DNMT1;FBXO5;POLA1;TUBA1B;DMC1;HIST1H3G;H2AFZ;DHFR;FZD8;CHAF1A;UNG;PPIL5;IRX4;GINS1;PAQR4;CLSPN;POLE;SKP2;CCDC109B;ATAD2;ZNF232;CDT1;FAM161A;SASS6;CDCA7;DLEU2;MXD3;TRIM59;MCM5;ARHGAP11A;NPR3;PKMYT1;STMN1;ZNF850;LHX2;CACYBP;ZIC5;HSPA12A;MCM10;GEN1;MCM4…	2;4;5;7;10;12;15;16;17;18;20;30;31;38;47;48;50;60;62;65;66;67;72;84;85;92;97;106;121;123;134;136;141;142;152;159;167;171;187;197;202;207;221;224;226;237;246;259;275;286;288;316;331;349;356;362;364;375;379;386;407;423;426;429;458;474;507;513;515;533;554;561;587;606;617;622;645;660;663;668;704;708;709;713;728;744;754;764;775;784;836;854;885;898;947;960;987;1032;1037;1056;1075;1076;1086;1097;1108;11…
RNAseq_downregulated_genes	13	transfac_pro-M00918	V$E2F_Q3_01	E2F7,E2F5,E2F4,E2F3,E2F2,E2F1,TFDP3,TFDP1	hg19-tss-centered-10kb-10species	0.0637048	9.66185	E2F2;RBL1;MCM6;UHRF1;E2F1;DTL;E2F8;RRM2;CDC6;ZNF367;HIST1H3G;DHFR;POLA1;MCM3;MCM5;CCDC109B;FBXO5;MCM2;RANBP1;KIF15;PHF17;CDC25A;MCM8;ATAD5;CHAF1A;DUSP9;PIM1;HMGN2;IRX4;MCM10;ZNF232;POLE;KIAA0101;MCM7;H2AFZ;NASP;HELLS;EZH2;STMN1;PAQR4;MCM4;ZIC5;PRKDC;TUBA1B;LMNB1;CDK1;TUBB;RFWD3;BRI3BP;CLSPN;DNMT1;KIAA1274;FZD8;BEND3;SKP2;NUP155;CDT1;GINS1;PKMYT1;UNG;HSPA12A;HIST1H2BJ;LHX2;SASS6;FAM161A;JPH1;DCK;A…	E2F2;RBL1;MCM6;UHRF1;E2F1;DTL;E2F8;RRM2;CDC6;ZNF367;HIST1H3G;DHFR;POLA1;MCM3;MCM5;CCDC109B;FBXO5;MCM2;RANBP1;KIF15;PHF17;CDC25A;MCM8;ATAD5;CHAF1A;DUSP9;PIM1;HMGN2;IRX4;MCM10;ZNF232;POLE;KIAA0101;MCM7;H2AFZ;NASP;HELLS;EZH2;STMN1;PAQR4;MCM4;ZIC5;PRKDC;TUBA1B;LMNB1;CDK1;TUBB;RFWD3;BRI3BP;CLSPN;DNMT1;KIAA1274;FZD8;BEND3;SKP2;NUP155;CDT1;GINS1;PKMYT1;UNG;HSPA12A;HIST1H2BJ;LHX2;SASS6;FAM161A;JPH1;DCK;A…	3;4;7;8;9;14;15;17;18;22;24;25;38;48;64;65;66;73;75;76;85;88;94;98;115;130;136;140;144;155;158;159;165;173;181;185;193;200;214;229;237;241;246;251;254;258;264;276;278;280;285;287;291;305;315;326;339;353;359;367;378;392;409;412;437;454;457;475;484;488;556;563;564;576;581;595;629;659;696;739;757;781;784;785;788;841;846;852;857;864;865;875;885;938;942;944;968;979;981;1000;1016;1018;1036;1054;1059;10…
RNAseq_downregulated_genes	14	transfac_pro-M00940	V$E2F1_Q6_01	E2F7,E2F6,E2F5,E2F4,E2F3,E2F2,E2F1,TFDP3,TFDP1	hg19-tss-centered-10kb-10species	0.063504	9.62072	MCM3;UHRF1;E2F2;ZNF367;E2F8;TUBA1B;MCM6;HMGN2;NASP;RANBP1;E2F1;RBL1;POLA1;CASP8AP2;ATAD5;FBXO5;NOLC1;PRKDC;KIF15;PHF17;IRX4;MCM4;MCM2;HMGB1;NR2F1;MCM7;KIAA1274;HIST1H3G;DTL;MCM5;HIST1H2BJ;UNG;LHX2;DHFR;FANCC;CCDC109B;PIM1;SSRP1;RRM2;RMI1;H2AFZ;TIPIN;KIAA0101;DLEU2;HELLS;CDT1;RFWD3;ZNF232;PAQR4;RFC3;ONECUT1;JAG2;C12orf34;LOC100128191;TMPO;DMC1;MCM10;HNRNPD;MCM8;POLE;PASK;DNMT1;DUSP9;ZIC5;CENPH;LSM…	MCM3;UHRF1;E2F2;ZNF367;E2F8;TUBA1B;MCM6;HMGN2;NASP;RANBP1;E2F1;RBL1;POLA1;CASP8AP2;ATAD5;FBXO5;NOLC1;PRKDC;KIF15;PHF17;IRX4;MCM4;MCM2;HMGB1;NR2F1;MCM7;KIAA1274;HIST1H3G;DTL;MCM5;HIST1H2BJ;UNG;LHX2;DHFR;FANCC;CCDC109B;PIM1;SSRP1;RRM2;RMI1;H2AFZ;TIPIN;KIAA0101;DLEU2;HELLS;CDT1;RFWD3;ZNF232;PAQR4;RFC3;ONECUT1;JAG2;C12orf34;LOC100128191;TMPO;DMC1;MCM10;HNRNPD;MCM8;POLE;PASK;DNMT1;DUSP9;ZIC5;CENPH;LSM…	3;4;5;6;10;11;12;13;14;23;25;27;29;30;32;37;44;76;77;82;90;94;95;101;109;112;117;118;123;128;132;133;156;160;165;168;169;173;184;206;208;239;249;259;260;264;294;302;305;318;322;327;334;348;350;358;365;379;380;382;392;411;419;427;457;467;488;504;509;529;536;569;577;590;608;609;618;622;629;631;643;649;678;681;690;696;697;703;707;739;755;767;794;829;837;838;849;862;865;873;875;897;920;929;936;938;97…
RNAseq_downregulated_genes	15	factorbook-E2F4	E2F4	E2F7,E2F6,E2F4,E2F1	hg19-tss-centered-10kb-10species	0.0626344	9.44264	HMGN2;UHRF1;MSH5;E2F8;TUBA1B;DNMT3B;KIF15;MYBL2;C12orf34;CDCA3;ATAD5;ZNF367;HIST1H3G;MCM3;C1orf135;LIN52;FANCC;CASP8AP2;PBX3;NASP;FANCD2;LHX4;PBK;CDC6;GPRIN1;DUSP9;PIM1;ZNF232;NEIL3;MCM6;SH3BP1;ATAD2;SLBP;IRX4;LHX2;FBXO5;NFIX;SPSB4;TCOF1;DUT;KIAA1274;TYRO3;HELLS;DLL1;FAM72B;LOC254559;JAG2;FAM72D;E2F2;FAM72A;CENPF;RRM2;RAD18;JPH1;NR2F1;MCM10;CCNE2;PRIM2;MND1;NCAPH2;H2AFX;VRK1;PHF17;BRCA1;DNA2;CCDC…	HMGN2;UHRF1;MSH5;E2F8;TUBA1B;DNMT3B;KIF15;MYBL2;C12orf34;CDCA3;ATAD5;ZNF367;HIST1H3G;MCM3;C1orf135;LIN52;FANCC;CASP8AP2;PBX3;NASP;FANCD2;LHX4;PBK;CDC6;GPRIN1;DUSP9;PIM1;ZNF232;NEIL3;MCM6;SH3BP1;ATAD2;SLBP;IRX4;LHX2;FBXO5;NFIX;SPSB4;TCOF1;DUT;KIAA1274;TYRO3;HELLS;DLL1;FAM72B;LOC254559;JAG2;FAM72D;E2F2;FAM72A;CENPF;RRM2;RAD18;JPH1;NR2F1;MCM10;CCNE2;PRIM2;MND1;NCAPH2;H2AFX;VRK1;PHF17;BRCA1;DNA2;CCDC…	3;4;5;13;17;18;22;25;34;35;36;39;43;45;46;47;50;55;72;75;80;87;96;102;107;119;129;130;134;147;150;179;185;190;199;201;214;218;226;233;241;250;268;274;276;285;295;297;300;302;309;335;342;343;348;353;369;371;377;381;386;388;391;447;452;471;500;509;527;529;537;551;554;578;600;602;603;611;620;634;643;647;654;659;674;687;692;694;712;716;736;737;765;800;813;816;833;834;835;842;861;883;893;896;901;911;9…
RNAseq_downregulated_genes	16	transfac_public-M00050	V$E2F_02	E2F7,E2F5,E2F4,E2F3,E2F2,E2F1,TFDP3,TFDP1	hg19-tss-centered-10kb-10species	0.0613632	9.18231	RBL1;E2F2;ZNF367;MCM6;MCM3;RRM2;E2F1;E2F8;NASP;UHRF1;CDC6;HELLS;DTL;ATAD5;PHF17;LHX2;ZNF850;POLA1;CDC25A;PIM1;HIST1H2BJ;TUBA1B;HIST1H3G;MCM8;IRX4;EZH2;RANBP1;KIF15;FBXO5;TOPBP1;NPR3;DPYSL2;MCM5;CLSPN;FZD8;MCM2;DHFR;GINS1;TRIM59;DNMT1;MCM7;H2AFZ;DMC1;CCDC109B;DLL1;CASC5;HSPA12A;TIPIN;PPIL5;DUSP9;POLE;GAS2L3;MXD3;CDCA7;ZNF232;CDK1;CASP8AP2;FAM161A;CDT1;SASS6;CACYBP;PKMYT1;PAQR4;NR2C2AP;UNG;ARHGAP11…	RBL1;E2F2;ZNF367;MCM6;MCM3;RRM2;E2F1;E2F8;NASP;UHRF1;CDC6;HELLS;DTL;ATAD5;PHF17;LHX2;ZNF850;POLA1;CDC25A;PIM1;HIST1H2BJ;TUBA1B;HIST1H3G;MCM8;IRX4;EZH2;RANBP1;KIF15;FBXO5;TOPBP1;NPR3;DPYSL2;MCM5;CLSPN;FZD8;MCM2;DHFR;GINS1;TRIM59;DNMT1;MCM7;H2AFZ;DMC1;CCDC109B;DLL1;CASC5;HSPA12A;TIPIN;PPIL5;DUSP9;POLE;GAS2L3;MXD3;CDCA7;ZNF232;CDK1;CASP8AP2;FAM161A;CDT1;SASS6;CACYBP;PKMYT1;PAQR4;NR2C2AP;UNG;ARHGAP11…	2;3;5;6;7;12;16;18;25;27;32;33;37;51;53;61;66;69;70;76;89;93;100;102;106;113;123;125;128;129;134;147;154;157;162;167;169;175;192;225;227;235;238;261;265;267;282;284;303;314;317;333;348;349;360;382;384;386;394;413;415;422;433;440;461;491;513;520;563;569;587;636;669;695;714;748;790;800;823;841;859;870;881;889;903;930;944;957;966;972;989;1001;1007;1028;1053;1064;1092;1097;1100;1104;1108;1159;1187;11…
RNAseq_downregulated_genes	17	transfac_pro-M00739	V$E2F4DP2_01	E2F7,E2F5,E2F4,E2F3,E2F2,E2F1	hg19-tss-centered-10kb-10species	0.0609559	9.09889	ZNF367;MCM3;UHRF1;E2F2;RBL1;E2F8;RRM2;MCM6;RANBP1;LOC100128191;TMPO;E2F1;MCM7;PRKDC;NOLC1;MCM4;HELLS;TUBA1B;ATAD5;KIAA0101;NASP;FZD8;CCDC109B;HIST1H3G;FANCC;POLA1;CDCA7;IRX4;DUSP9;TOPBP1;JAG2;C2CD4C;SSRP1;KIAA1274;ZIC5;GINS2;UNG;LHX2;CASP8AP2;CDT1;KIF15;MCM2;CDC6;PPIL5;ZNF232;DTL;GINS3;MCM5;NR2F1;LIN52;HIST1H2BJ;SKP2;FAM161A;DLL1;FGFR3;DLEU2;PIM1;YBX2;PSMC3IP;PHF17;HNRNPD;KDELC2;DEK;BRIP1;DHFR;CD…	ZNF367;MCM3;UHRF1;E2F2;RBL1;E2F8;RRM2;MCM6;RANBP1;LOC100128191;TMPO;E2F1;MCM7;PRKDC;NOLC1;MCM4;HELLS;TUBA1B;ATAD5;KIAA0101;NASP;FZD8;CCDC109B;HIST1H3G;FANCC;POLA1;CDCA7;IRX4;DUSP9;TOPBP1;JAG2;C2CD4C;SSRP1;KIAA1274;ZIC5;GINS2;UNG;LHX2;CASP8AP2;CDT1;KIF15;MCM2;CDC6;PPIL5;ZNF232;DTL;GINS3;MCM5;NR2F1;LIN52;HIST1H2BJ;SKP2;FAM161A;DLL1;FGFR3;DLEU2;PIM1;YBX2;PSMC3IP;PHF17;HNRNPD;KDELC2;DEK;BRIP1;DHFR;CD…	3;4;5;6;7;15;16;21;23;24;25;30;41;43;48;51;53;59;63;74;82;88;104;119;122;125;135;148;159;160;165;169;170;183;212;215;216;225;229;233;235;251;261;270;274;278;280;284;290;295;301;308;315;324;328;339;347;365;366;389;414;433;455;465;468;479;529;542;543;607;615;622;633;642;662;666;685;700;734;744;756;760;770;771;782;793;798;799;806;830;861;872;895;901;916;936;952;973;1043;1048;1052;1060;1063;1071;1073…
RNAseq_downregulated_genes	18	homer-M00030	E2F4(E2F)/K562-E2F4-ChIP-Seq(GSE31477)/Homer	E2F7,E2F6,E2F4,E2F1	hg19-tss-centered-10kb-10species	0.0608308	9.07328	MCM3;ZNF367;TUBA1B;E2F8;NOLC1;RANBP1;UHRF1;E2F2;LOC100128191;TMPO;FBXO5;FANCC;ATAD5;CASP8AP2;MCM6;MCM4;HMGN2;PRKDC;RFWD3;IRX4;NASP;DUSP9;LHX2;MCM7;ANKRD32;POLA1;KNTC1;HIST1H3G;SSRP1;TYRO3;ATAD2;GPRIN1;E2F1;CDT1;GINS3;DCLRE1A;NR2F1;LMNB1;NCAPG;RBL1;WDR76;FGFR3;CCDC109B;KIAA0101;ZIC5;DHFR;DUT;PIM1;MCM5;RRM2;TCOF1;YBX2;MSH5;RMI1;GINS2;USP37;LIN52;JAG2;KIAA1274;SLC38A3;KIF15;NRM;FZD8;HELLS;C2CD4C;CEN…	MCM3;ZNF367;TUBA1B;E2F8;NOLC1;RANBP1;UHRF1;E2F2;LOC100128191;TMPO;FBXO5;FANCC;ATAD5;CASP8AP2;MCM6;MCM4;HMGN2;PRKDC;RFWD3;IRX4;NASP;DUSP9;LHX2;MCM7;ANKRD32;POLA1;KNTC1;HIST1H3G;SSRP1;TYRO3;ATAD2;GPRIN1;E2F1;CDT1;GINS3;DCLRE1A;NR2F1;LMNB1;NCAPG;RBL1;WDR76;FGFR3;CCDC109B;KIAA0101;ZIC5;DHFR;DUT;PIM1;MCM5;RRM2;TCOF1;YBX2;MSH5;RMI1;GINS2;USP37;LIN52;JAG2;KIAA1274;SLC38A3;KIF15;NRM;FZD8;HELLS;C2CD4C;CEN…	2;4;5;6;8;10;11;13;15;16;24;26;33;40;42;48;49;50;52;56;61;79;83;94;104;108;115;122;133;164;165;171;186;206;214;217;223;227;236;243;258;262;274;275;294;299;307;322;342;364;368;373;375;377;387;393;394;397;398;420;427;467;469;476;484;485;491;510;526;538;558;579;582;610;613;619;626;631;645;648;651;657;669;685;695;701;709;710;736;758;778;791;793;796;816;819;839;852;877;881;895;900;907;911;950;963;967;…
RNAseq_downregulated_genes	19	swissregulon-E2F1..5.p2	E2F4,E2F5,E2F2,E2F1,E2F3	E2F7,E2F5,E2F4,E2F3,E2F2,E2F1,TFDP3,TFDP1	hg19-tss-centered-10kb-10species	0.0604538	8.99608	RBL1;E2F2;ZNF367;MCM6;RRM2;E2F1;MCM3;E2F8;NASP;DTL;HELLS;PHF17;CDC6;POLA1;UHRF1;FBXO5;CDC25A;HIST1H3G;MCM8;KIF15;TOPBP1;DNMT1;PIM1;ATAD5;LHX2;NUP155;HIST1H2BJ;GINS1;DMC1;DPYSL2;EZH2;FZD8;MCM2;SASS6;TUBA1B;MXD3;H2AFZ;PKMYT1;ZNF232;CLSPN;CDT1;RANBP1;ATAD2;FAM161A;CASP8AP2;MCM7;DLL1;FANCC;CACYBP;UNG;CCDC109B;IRX4;PAQR4;DCK;POLE;MCM5;STMN1;TIPIN;ARHGAP11A;CDCA7;TRIM59;GINS2;PPIL5;DHFR;CASC5;TNFAIP8L3…	RBL1;E2F2;ZNF367;MCM6;RRM2;E2F1;MCM3;E2F8;NASP;DTL;HELLS;PHF17;CDC6;POLA1;UHRF1;FBXO5;CDC25A;HIST1H3G;MCM8;KIF15;TOPBP1;DNMT1;PIM1;ATAD5;LHX2;NUP155;HIST1H2BJ;GINS1;DMC1;DPYSL2;EZH2;FZD8;MCM2;SASS6;TUBA1B;MXD3;H2AFZ;PKMYT1;ZNF232;CLSPN;CDT1;RANBP1;ATAD2;FAM161A;CASP8AP2;MCM7;DLL1;FANCC;CACYBP;UNG;CCDC109B;IRX4;PAQR4;DCK;POLE;MCM5;STMN1;TIPIN;ARHGAP11A;CDCA7;TRIM59;GINS2;PPIL5;DHFR;CASC5;TNFAIP8L3…	2;3;4;5;6;9;11;13;21;22;23;27;29;34;39;44;68;74;81;82;91;93;97;99;113;115;127;128;132;136;154;159;181;187;195;205;208;219;227;235;242;253;255;256;258;281;287;289;290;292;302;308;314;325;332;334;335;344;356;364;468;486;487;512;515;523;528;553;597;638;654;658;666;678;690;713;715;720;721;722;725;744;749;753;759;776;791;802;847;851;879;911;939;948;949;970;979;983;1033;1044;1058;1084;1095;1115;1117;11…
RNAseq_downregulated_genes	20	wgEncodeSydhTfbsGm12878E2f4IggmusPk.narrowPeak.gz	E2F4/GM12878/None	E2F4	hg19-tss-centered-10kb-chip-encode-taipale-inhouse	0.148217	8.4288	WNT10B;ARHGAP11A;NCAPG2;C21orf58;IQGAP3;LOC642846;GPRIN1;BUB1B;CDC20;NUP155;ANLN;MYBL2;FANCB;SKA3;SPC24;TRIP13;TRAIP;DIAPH3;CHTF18;UNG;DEPDC1B;POC1A;NUDT1;CDC25C;TROAP;RAD54L;DDX11;AURKB;WDR67;TACC3;NEK2;GGH;CDC25B;LIN9;MKI67;RRM2;CDCA8;KIF4A;SPAG5;KIF20A;C19orf40;PRC1;FANCD2;LOXL3;DOK1;ODF2;C15orf42;ASPM;C13orf34;HMGB2;MZT1;SUV39H1;FOXM1;HMGB1;KIF18B;C12orf32;CENPI;CIT;FANCA;GINS2;TRIM59;RECQL4;…	WNT10B;ARHGAP11A;NCAPG2;C21orf58;IQGAP3;LOC642846;GPRIN1;BUB1B;CDC20;NUP155;ANLN;MYBL2;FANCB;SKA3;SPC24;TRIP13;TRAIP;DIAPH3;CHTF18;UNG;DEPDC1B;POC1A;NUDT1;CDC25C;TROAP;RAD54L;DDX11;AURKB;WDR67;TACC3;NEK2;GGH;CDC25B;LIN9;MKI67;RRM2;CDCA8;KIF4A;SPAG5;KIF20A;C19orf40;PRC1;FANCD2;LOXL3;DOK1;ODF2;C15orf42;ASPM;C13orf34;HMGB2;MZT1;SUV39H1;FOXM1;HMGB1;KIF18B;C12orf32;CENPI;CIT;FANCA;GINS2;TRIM59;RECQL4;…	11;17;31;32;37;38;39;40;42;47;48;51;52;53;56;59;62;63;64;66;67;75;76;79;85;87;89;90;91;93;94;95;99;101;102;107;108;112;113;117;123;127;128;129;130;131;133;134;136;137;138;141;142;144;145;148;150;154;155;156;161;162;166;171;177;180;181;185;187;196;198;199;202;203;208;210;217;219;220;221;222;223;224;225;230;232;233;239;240;242;244;246;252;253;255;256;259;261;262;266;271;272;276;280;282;283;284;287;…
RNAseq_downregulated_genes	21	jaspar-MA0024.1	E2F1	E2F7,E2F5,E2F4,E2F3,E2F2,E2F1,TFDP3,TFDP1	hg19-tss-centered-10kb-10species	0.0575438	8.40014	RBL1;E2F2;ZNF367;MCM6;MCM3;RRM2;E2F1;E2F8;NASP;CDC6;DTL;UHRF1;HELLS;PHF17;ZNF850;ATAD5;LHX2;PIM1;POLA1;HIST1H3G;MCM8;RANBP1;FBXO5;EZH2;NPR3;TUBA1B;CDC25A;KIF15;MCM5;GINS1;TRIM59;CLSPN;HIST1H2BJ;IRX4;FZD8;DPYSL2;DLL1;DHFR;TOPBP1;DNMT1;POLE;CASC5;CCDC109B;DMC1;H2AFZ;HSPA12A;CASP8AP2;GAS2L3;PPIL5;MXD3;TIPIN;NUP155;MCM2;FAM161A;NR2C2AP;TNFAIP8L3;SASS6;MCM7;CACYBP;ZNF232;UNG;CDT1;PKMYT1;DUSP9;CDK1;STM…	RBL1;E2F2;ZNF367;MCM6;MCM3;RRM2;E2F1;E2F8;NASP;CDC6;DTL;UHRF1;HELLS;PHF17;ZNF850;ATAD5;LHX2;PIM1;POLA1;HIST1H3G;MCM8;RANBP1;FBXO5;EZH2;NPR3;TUBA1B;CDC25A;KIF15;MCM5;GINS1;TRIM59;CLSPN;HIST1H2BJ;IRX4;FZD8;DPYSL2;DLL1;DHFR;TOPBP1;DNMT1;POLE;CASC5;CCDC109B;DMC1;H2AFZ;HSPA12A;CASP8AP2;GAS2L3;PPIL5;MXD3;TIPIN;NUP155;MCM2;FAM161A;NR2C2AP;TNFAIP8L3;SASS6;MCM7;CACYBP;ZNF232;UNG;CDT1;PKMYT1;DUSP9;CDK1;STM…	2;3;10;11;12;17;21;24;25;30;35;38;45;59;61;64;70;80;81;82;85;92;108;109;113;117;118;129;144;146;151;156;159;161;171;189;192;194;203;251;269;273;280;310;325;331;333;341;354;358;360;407;408;412;420;426;439;453;455;472;480;483;488;503;510;552;555;571;579;625;666;673;717;754;761;774;775;777;826;840;890;906;908;909;954;987;990;997;1027;1038;1050;1099;1109;1117;1120;1164;1177;1198;1205;1214;1224;1234;1…
RNAseq_downregulated_genes	22	transfac_pro-M00425	V$E2F_Q3	E2F7,E2F5,E2F4,E2F3,E2F2,E2F1,TFDP3,TFDP1	hg19-tss-centered-10kb-10species	0.0570077	8.29034	RBL1;E2F2;MCM6;UHRF1;ZNF367;E2F1;MCM3;RRM2;DHFR;DTL;IRX4;ATAD5;KIF15;HELLS;POLA1;DPYSL2;CDC25A;TOPBP1;HIST1H2BJ;CDC6;MCM2;PHF17;ZNF850;LHX2;PIM1;FBXO5;PAQR4;PPIL5;MCM8;HIST1H3G;TUBA1B;RANBP1;CDK1;MCM7;EZH2;NASP;E2F8;NPR3;MCM5;NR2C2AP;GINS1;ZNF232;TRIM59;HMGB1;DNMT1;POLE;DUSP9;CLSPN;GEN1;TIPIN;ONECUT1;H2AFZ;DMC1;UNG;CDCA7;DLEU2;ZIC5;CCDC109B;MIR17HG;CHAF1A;MCM10;TFDP1;GAS2L3;HSPA12A;BRI3BP;SIP1;PH…	RBL1;E2F2;MCM6;UHRF1;ZNF367;E2F1;MCM3;RRM2;DHFR;DTL;IRX4;ATAD5;KIF15;HELLS;POLA1;DPYSL2;CDC25A;TOPBP1;HIST1H2BJ;CDC6;MCM2;PHF17;ZNF850;LHX2;PIM1;FBXO5;PAQR4;PPIL5;MCM8;HIST1H3G;TUBA1B;RANBP1;CDK1;MCM7;EZH2;NASP;E2F8;NPR3;MCM5;NR2C2AP;GINS1;ZNF232;TRIM59;HMGB1;DNMT1;POLE;DUSP9;CLSPN;GEN1;TIPIN;ONECUT1;H2AFZ;DMC1;UNG;CDCA7;DLEU2;ZIC5;CCDC109B;MIR17HG;CHAF1A;MCM10;TFDP1;GAS2L3;HSPA12A;BRI3BP;SIP1;PH…	2;4;7;11;16;17;33;35;36;38;40;45;50;51;55;59;62;65;88;98;99;105;106;109;127;140;142;150;151;153;157;159;165;167;171;175;182;188;193;200;227;238;255;278;282;322;338;339;358;359;375;376;379;396;401;419;423;478;487;489;509;510;517;545;559;560;593;606;674;675;676;677;685;720;743;748;767;796;804;808;831;840;842;855;868;884;893;894;895;914;922;925;926;938;964;967;968;972;973;990;1000;1005;1030;1094;112…
RNAseq_downregulated_genes	23	homer-M00029	E2F1(E2F)/Hela-E2F1-ChIP-Seq/Hoemr	E2F6,E2F4,E2F1	hg19-tss-centered-10kb-10species	0.0537113	7.61526	TUBA1B;MCM3;NOLC1;ZNF367;RANBP1;UHRF1;DCLRE1A;EZH2;CASP8AP2;E2F8;HMGB2;KLF11;ATAD2;HIST1H3G;SH3BP1;USP37;LOC100128191;TMPO;DUSP9;WDR76;RFC4;KIAA0101;KIAA1274;PRIM1;HMGN2;MIR17HG;CHAF1A;PRKDC;CCDC109B;ZNF232;LHX4;H1FX;MSH5;MCM7;GINS2;FOXD2;MCM4;MNX1;BRIP1;GJB2;RBL1;LHX2;IRX4;TRIM59;LIN52;DEK;TIMELESS;PIM1;PITX1;THOC4;TYRO3;TFAP4;HNRNPD;KDELC2;NES;NCAPG;FAM161A;NRARP;TUBB;PSMC3IP;ZNF850;SSRP1;FAM72…	TUBA1B;MCM3;NOLC1;ZNF367;RANBP1;UHRF1;DCLRE1A;EZH2;CASP8AP2;E2F8;HMGB2;KLF11;ATAD2;HIST1H3G;SH3BP1;USP37;LOC100128191;TMPO;DUSP9;WDR76;RFC4;KIAA0101;KIAA1274;PRIM1;HMGN2;MIR17HG;CHAF1A;PRKDC;CCDC109B;ZNF232;LHX4;H1FX;MSH5;MCM7;GINS2;FOXD2;MCM4;MNX1;BRIP1;GJB2;RBL1;LHX2;IRX4;TRIM59;LIN52;DEK;TIMELESS;PIM1;PITX1;THOC4;TYRO3;TFAP4;HNRNPD;KDELC2;NES;NCAPG;FAM161A;NRARP;TUBB;PSMC3IP;ZNF850;SSRP1;FAM72…	1;2;4;8;9;11;16;22;27;28;48;55;72;81;92;98;104;109;125;126;130;135;148;154;155;170;188;198;208;215;221;223;235;252;272;281;283;289;292;294;295;302;313;318;323;334;344;362;379;406;407;411;412;448;457;480;491;498;499;505;519;521;545;549;563;566;574;577;579;584;591;592;599;631;632;638;641;658;659;666;672;700;706;717;727;737;746;748;749;754;756;771;782;807;871;915;940;950;962;963;966;974;978;1051;109…
RNAseq_downregulated_genes	24	homer-M01784	STB1(MacIsaac)/Yeast	E2F1	hg19-tss-centered-10kb-10species	0.0533911	7.54969	E2F2;ZNF367;UNG;RBL1;C12orf34;ATAD5;MCM3;ONECUT1;UHRF1;DLEU2;HIST1H2BJ;MCM6;DNMT1;MCM2;ZNF232;HMGN2;MCM8;PHF17;MCM10;CDCA8;ZWILCH;HNRNPD;CDC25B;IRX4;PIM1;MCM4;PRKDC;GABRA1;TUBA1B;JPH1;CDCA7;PHF19;STMN1;PRIMA1;CCDC109B;PKMYT1;HIST1H3G;SIX2;E2F1;TFDP1;SHCBP1;KIF26A;FAM81A;MXD3;ATAD2;RANBP1;GPR19;KCTD12;TRIM59;ANP32E;PPIL5;CACYBP;CHEK1;PAQR4;DHFR;NASP;CENPF;GAS2L3;HELLS;SSRP1;ARID5A;HSPA2;DNAJC9;ORC…	E2F2;ZNF367;UNG;RBL1;C12orf34;ATAD5;MCM3;ONECUT1;UHRF1;DLEU2;HIST1H2BJ;MCM6;DNMT1;MCM2;ZNF232;HMGN2;MCM8;PHF17;MCM10;CDCA8;ZWILCH;HNRNPD;CDC25B;IRX4;PIM1;MCM4;PRKDC;GABRA1;TUBA1B;JPH1;CDCA7;PHF19;STMN1;PRIMA1;CCDC109B;PKMYT1;HIST1H3G;SIX2;E2F1;TFDP1;SHCBP1;KIF26A;FAM81A;MXD3;ATAD2;RANBP1;GPR19;KCTD12;TRIM59;ANP32E;PPIL5;CACYBP;CHEK1;PAQR4;DHFR;NASP;CENPF;GAS2L3;HELLS;SSRP1;ARID5A;HSPA2;DNAJC9;ORC…	2;4;5;9;10;12;14;18;19;31;33;38;39;42;69;71;72;78;80;81;89;93;99;102;108;129;132;133;145;148;154;196;229;230;235;242;269;273;294;297;313;315;320;321;323;328;331;333;367;376;399;412;459;474;483;490;517;518;545;554;557;562;576;587;605;659;661;669;674;681;702;711;748;763;785;831;868;915;943;976;977;1045;1050;1055;1079;1092;1093;1101;1131;1150;1164;1195;1200;1203;1224;1239;1259;1268;1289;1291;1316;13…
RNAseq_downregulated_genes	25	taipale-TTTTCCCGCCAAAW-E2F7-DBD	TTTTCCCGCCAAAW-E2F7-DBD	E2F7	hg19-tss-centered-10kb-10species	0.0533664	7.54465	CHEK1;MCM4;PRKDC;UHRF1;CHAF1A;RANBP1;MCM6;UNG;KNTC1;MCM5;MCM7;C12orf34;MCM2;STMN1;E2F8;PRIM1;HAUS7;CCDC109B;WDR76;E2F1;OSBPL6;DNMT1;NASP;PHF19;EZH2;ANKRD32;RAD51;CDC45;SLBP;CSRP2;SLC25A28;LSM6;C16orf75;FBXO5;EPB41L2;DCLRE1A;MYBL2;HMGB2;CDT1;DHFR;SLC16A10;TYRO3;CENPH;PIM1;TUBGCP3;XYLB;FAM72B;FAM72A;RAD54B;RRM2;TP73;CCDC99;ZBTB2;LRRC3;RAD51AP1;NUSAP1;DNAJC9;GPR19;MZT1;SLMO1;S1PR5;DLEU2;ORC1;TNFAIP8…	CHEK1;MCM4;PRKDC;UHRF1;CHAF1A;RANBP1;MCM6;UNG;KNTC1;MCM5;MCM7;C12orf34;MCM2;STMN1;E2F8;PRIM1;HAUS7;CCDC109B;WDR76;E2F1;OSBPL6;DNMT1;NASP;PHF19;EZH2;ANKRD32;RAD51;CDC45;SLBP;CSRP2;SLC25A28;LSM6;C16orf75;FBXO5;EPB41L2;DCLRE1A;MYBL2;HMGB2;CDT1;DHFR;SLC16A10;TYRO3;CENPH;PIM1;TUBGCP3;XYLB;FAM72B;FAM72A;RAD54B;RRM2;TP73;CCDC99;ZBTB2;LRRC3;RAD51AP1;NUSAP1;DNAJC9;GPR19;MZT1;SLMO1;S1PR5;DLEU2;ORC1;TNFAIP8…	1;2;3;5;6;11;12;13;15;20;21;25;27;28;36;38;42;45;60;86;87;89;99;111;132;142;150;153;159;163;165;166;177;184;196;200;201;217;226;240;257;288;318;359;369;385;390;392;413;433;435;444;448;455;459;501;534;541;544;547;558;618;642;648;659;665;666;707;711;714;731;769;770;805;810;828;833;861;892;932;957;968;972;980;997;1014;1027;1043;1069;1082;1183;1188;1207;1232;1287;1291;1293;1350;1386;1392;1404;1441;14…
RNAseq_downregulated_genes	26	transfac_pro-M00737	V$E2F1DP2_01	E2F4,E2F1	hg19-tss-centered-10kb-10species	0.0522354	7.31302	ZNF367;E2F2;MCM3;UHRF1;RBL1;E2F8;RRM2;E2F1;LOC100128191;TMPO;PRKDC;MCM6;CCDC109B;MCM4;NASP;RANBP1;NOLC1;TUBA1B;HELLS;FZD8;POLA1;DLL1;MCM7;CDCA7;HIST1H3G;FANCC;KIAA0101;ATAD5;JAG2;LHX2;CDC6;DTL;IRX4;KIAA1274;CASP8AP2;FGFR3;SSRP1;DUSP9;UNG;TOPBP1;GINS2;KDELC2;LIN52;MCM5;CDT1;GINS3;C2CD4C;DLEU2;PSMC3IP;FAM161A;ZNF850;YBX2;TFAP4;ZIC5;PIM1;MCM2;PBX3;NR2F1;KIF15;HNRNPD;PPIL5;POLE;STMN1;TRIM59;DHFR;GAS2…	ZNF367;E2F2;MCM3;UHRF1;RBL1;E2F8;RRM2;E2F1;LOC100128191;TMPO;PRKDC;MCM6;CCDC109B;MCM4;NASP;RANBP1;NOLC1;TUBA1B;HELLS;FZD8;POLA1;DLL1;MCM7;CDCA7;HIST1H3G;FANCC;KIAA0101;ATAD5;JAG2;LHX2;CDC6;DTL;IRX4;KIAA1274;CASP8AP2;FGFR3;SSRP1;DUSP9;UNG;TOPBP1;GINS2;KDELC2;LIN52;MCM5;CDT1;GINS3;C2CD4C;DLEU2;PSMC3IP;FAM161A;ZNF850;YBX2;TFAP4;ZIC5;PIM1;MCM2;PBX3;NR2F1;KIF15;HNRNPD;PPIL5;POLE;STMN1;TRIM59;DHFR;GAS2…	3;4;5;7;9;13;17;26;32;34;43;45;55;61;68;69;73;76;85;98;109;112;115;117;119;129;145;149;156;195;198;216;217;219;255;258;268;286;306;314;321;339;351;374;385;394;396;399;409;417;428;434;457;482;495;498;510;512;527;532;547;548;572;593;597;609;611;627;634;639;655;672;681;701;706;710;715;757;776;834;853;859;922;945;953;986;1020;1050;1059;1080;1094;1096;1110;1113;1154;1164;1186;1188;1191;1193;1197;1200;…
RNAseq_downregulated_genes	27	yetfasco-592	YNL309W		hg19-tss-centered-10kb-10species	0.0513507	7.13184	E2F2;ZNF367;RBL1;UNG;C12orf34;MCM3;ATAD5;UHRF1;ONECUT1;MCM6;DLEU2;HELLS;PRIMA1;HIST1H2BJ;MCM8;IRX4;MCM2;DNMT1;PHF17;HMGN2;TUBA1B;ZNF232;PIM1;ZWILCH;E2F1;CDCA8;GABRA1;JPH1;MCM10;ANP32E;DHFR;CDCA7;CDC25B;STMN1;MCM4;CCDC109B;NASP;GPR19;PRKDC;HMGB1;PKMYT1;HNRNPD;GAS2L3;RNF219;PHF19;ARID5A;MXD3;HIST1H3G;DNAJC9;SIX2;PPIL5;FAM81A;NR2F1;TRIM59;TIPIN;ASRGL1;TFDP1;KCTD12;SSRP1;LSM6;CENPF;CHEK1;RANBP1;KIF26…	E2F2;ZNF367;RBL1;UNG;C12orf34;MCM3;ATAD5;UHRF1;ONECUT1;MCM6;DLEU2;HELLS;PRIMA1;HIST1H2BJ;MCM8;IRX4;MCM2;DNMT1;PHF17;HMGN2;TUBA1B;ZNF232;PIM1;ZWILCH;E2F1;CDCA8;GABRA1;JPH1;MCM10;ANP32E;DHFR;CDCA7;CDC25B;STMN1;MCM4;CCDC109B;NASP;GPR19;PRKDC;HMGB1;PKMYT1;HNRNPD;GAS2L3;RNF219;PHF19;ARID5A;MXD3;HIST1H3G;DNAJC9;SIX2;PPIL5;FAM81A;NR2F1;TRIM59;TIPIN;ASRGL1;TFDP1;KCTD12;SSRP1;LSM6;CENPF;CHEK1;RANBP1;KIF26…	2;3;5;10;13;16;18;24;26;29;33;34;35;44;48;58;84;87;94;105;110;111;112;126;128;129;144;152;156;173;181;191;205;254;273;280;281;283;286;291;310;320;324;331;352;357;386;390;404;425;463;471;490;502;515;522;539;559;562;569;571;577;595;607;675;697;704;718;764;840;856;873;893;900;916;921;987;990;1011;1043;1098;1155;1175;1177;1271;1298;1300;1327;1334;1337;1381;1402;1428;1430;1442;1450;1451;1464;1467;1474…
RNAseq_downregulated_genes	28	transfac_pro-M00431	V$E2F1_Q6	E2F7,E2F5,E2F4,E2F3,E2F2,E2F1,TFDP3,TFDP1	hg19-tss-centered-10kb-10species	0.0513071	7.12291	E2F2;RBL1;UHRF1;MCM3;ZNF367;TUBA1B;POLA1;E2F8;RRM2;HMGN2;DHFR;PRKDC;MCM6;CCDC109B;MMP16;E2F1;MCM7;RANBP1;HIST1H3G;ZNF850;HELLS;ATAD5;PIM1;MCM4;DTL;DLL1;FBXO5;MCM2;CDC6;CDK1;FAM161A;MCM5;LMNB1;IRX4;ZIC5;NASP;DMC1;NOLC1;KIAA1274;FGFR3;JPH1;CASP8AP2;TRIM59;TOPBP1;LHX2;DUSP9;RNF219;KIF15;ZNF232;FZD8;PHF17;LOC100128191;CDC25A;TMPO;RMI1;RFWD3;CDT1;DPYSL2;YBX2;MCM10;HIST1H2BJ;MCM8;TUBB;POLE;EZH2;NR2F1;G…	E2F2;RBL1;UHRF1;MCM3;ZNF367;TUBA1B;POLA1;E2F8;RRM2;HMGN2;DHFR;PRKDC;MCM6;CCDC109B;MMP16;E2F1;MCM7;RANBP1;HIST1H3G;ZNF850;HELLS;ATAD5;PIM1;MCM4;DTL;DLL1;FBXO5;MCM2;CDC6;CDK1;FAM161A;MCM5;LMNB1;IRX4;ZIC5;NASP;DMC1;NOLC1;KIAA1274;FGFR3;JPH1;CASP8AP2;TRIM59;TOPBP1;LHX2;DUSP9;RNF219;KIF15;ZNF232;FZD8;PHF17;LOC100128191;CDC25A;TMPO;RMI1;RFWD3;CDT1;DPYSL2;YBX2;MCM10;HIST1H2BJ;MCM8;TUBB;POLE;EZH2;NR2F1;G…	3;4;6;9;10;11;16;19;29;37;41;54;56;57;62;69;71;73;82;88;90;92;110;114;115;121;133;139;143;146;149;190;198;201;217;220;241;271;273;274;294;298;323;399;412;422;433;434;449;450;464;490;491;497;504;509;519;550;559;564;618;627;632;645;651;672;677;713;719;727;732;752;760;770;781;796;799;842;927;937;947;961;970;984;994;998;1015;1093;1101;1102;1111;1112;1119;1179;1240;1256;1265;1283;1284;1305;1311;1378;1…
RNAseq_downregulated_genes	29	wgEncodeHaibTfbsEcc1Foxm1sc502V0422111PkRep2.broadPeak.gz	FOXM1_(SC-502)/ECC-1/None	FOXM1	hg19-tss-centered-10kb-chip-encode-taipale-inhouse	0.126047	6.95932	CCNB1;CDK1;GPSM2;ARL6IP1;CDKN3;C15orf23;UBE2C;CENPF;RAD21;FAM83D;CENPA;HMGB2;TUBA1C;RNF26;MKI67;CDC25B;KPNA2;CKAP2L;TROAP;GTSE1;TRIM59;CCNA2;TPX2;MZT1;C13orf34;CCNF;ASPM;LMNB1;KIF20B;FLJ37201;LMNB2;ECT2;MXD3;CCNB2;PRC1;PLK1;AMIGO2;PRR11;KIF11;SUN2;UBE2S;KIF2C;NCAPH;RACGAP1;TOP2A;NUF2;KIF18B;PTTG1;TTF2;SCLT1;KIF23;CEP55;KIF20A;HJURP;GAS2L3;KIF18A;C12orf48;HMMR;INCENP;CDCA2;H2AFX;NCAPD2;PIM1;TUBB2C…	CCNB1;CDK1;GPSM2;ARL6IP1;CDKN3;C15orf23;UBE2C;CENPF;RAD21;FAM83D;CENPA;HMGB2;TUBA1C;RNF26;MKI67;CDC25B;KPNA2;CKAP2L;TROAP;GTSE1;TRIM59;CCNA2;TPX2;MZT1;C13orf34;CCNF;ASPM;LMNB1;KIF20B;FLJ37201;LMNB2;ECT2;MXD3;CCNB2;PRC1;PLK1;AMIGO2;PRR11;KIF11;SUN2;UBE2S;KIF2C;NCAPH;RACGAP1;TOP2A;NUF2;KIF18B;PTTG1;TTF2;SCLT1;KIF23;CEP55;KIF20A;HJURP;GAS2L3;KIF18A;C12orf48;HMMR;INCENP;CDCA2;H2AFX;NCAPD2;PIM1;TUBB2C…	3;5;6;7;8;10;11;12;15;16;17;18;19;20;21;23;25;28;29;31;32;33;34;35;36;37;39;47;48;49;50;52;54;57;58;61;63;65;67;68;74;76;81;83;86;87;88;90;91;99;102;108;111;113;117;119;123;124;128;129;132;134;137;139;141;142;147;148;156;159;160;164;166;167;168;174;181;184;189;193;198;204;211;220;223;228;231;234;241;244;245;248;250;254;263;267;280;291;303;305;316;326;328;335;337;339;340;346;348;356;361;368;374;37…
RNAseq_downregulated_genes	30	taipale-TTTGGCGCCAAA-E2F1-DBD	TTTGGCGCCAAA-E2F1-DBD	E2F3,E2F2,E2F1	hg19-tss-centered-10kb-10species	0.0504508	6.94755	RRM2;PHF17;MCM6;E2F1;CDC25A;GINS1;DMC1;NASP;PIM1;CASP8AP2;DNMT1;ZIC5;EXOSC2;FBXO5;MCM7;SMC4;UNG;E2F2;TIPIN;DHFR;ONECUT1;MCM5;TP73;EXPH5;POLA1;LMNB2;TOPBP1;MCM2;IRX4;PBX3;MXD3;CENPF;FAM161A;CLSPN;HIST1H2BJ;C12orf34;NCAPH2;ATAD2;RELT;AKAP7;KIAA1274;ZNF232;RAD51;ORC1;MCM10;NPR3;E2F8;HIST1H3G;KIF15;WNT10B;NUP160;LOC254559;POLE2;HNRNPAB;SLC10A3;HEY2;TRIM59;DPYSL5;MCM8;LHX2;HSPA12A;SLC16A10;SPSB4;CCDC2…	RRM2;PHF17;MCM6;E2F1;CDC25A;GINS1;DMC1;NASP;PIM1;CASP8AP2;DNMT1;ZIC5;EXOSC2;FBXO5;MCM7;SMC4;UNG;E2F2;TIPIN;DHFR;ONECUT1;MCM5;TP73;EXPH5;POLA1;LMNB2;TOPBP1;MCM2;IRX4;PBX3;MXD3;CENPF;FAM161A;CLSPN;HIST1H2BJ;C12orf34;NCAPH2;ATAD2;RELT;AKAP7;KIAA1274;ZNF232;RAD51;ORC1;MCM10;NPR3;E2F8;HIST1H3G;KIF15;WNT10B;NUP160;LOC254559;POLE2;HNRNPAB;SLC10A3;HEY2;TRIM59;DPYSL5;MCM8;LHX2;HSPA12A;SLC16A10;SPSB4;CCDC2…	1;2;3;6;7;8;12;15;19;21;22;26;27;28;29;32;35;36;47;51;61;66;76;78;79;103;122;179;186;217;221;228;238;270;276;280;286;315;319;320;335;339;345;349;363;368;420;431;443;480;491;495;497;507;536;550;577;581;588;594;646;647;654;667;694;700;707;753;763;821;829;859;879;886;894;906;928;940;950;958;992;1005;1041;1042;1054;1071;1079;1092;1131;1147;1169;1175;1221;1254;1256;1277;1308;1311;1339;1348;1410;1442;1…
RNAseq_downregulated_genes	31	transfac_pro-M00427	V$E2F_Q6	E2F7,E2F5,E2F4,E2F3,E2F2,E2F1,TFDP3,TFDP1	hg19-tss-centered-10kb-10species	0.0503693	6.93086	E2F2;RBL1;ZNF367;MCM3;MCM6;HMGN2;RRM2;E2F1;POLA1;DHFR;E2F8;ATAD5;HELLS;ZNF850;DTL;CDC6;UHRF1;FBXO5;RANBP1;TRIM59;TUBA1B;NASP;ZIC5;IRX4;CCDC109B;CDC25A;HIST1H3G;KIF15;KIAA1274;PIM1;TOPBP1;MMP16;MCM2;PHF17;FAM161A;EZH2;RNF219;DUSP9;ZNF232;HIST1H2BJ;DLL1;CLSPN;LMNB1;MCM7;MCM8;MCM5;LHX2;DPYSL2;POLE;GAS2L3;NR2C2AP;POLA2;DMC1;CDT1;GINS1;PPIL5;FZD8;UNG;JPH1;CDK1;TYRO3;PRKDC;JAG2;DTYMK;SIX2;RFWD3;HSPA12A…	E2F2;RBL1;ZNF367;MCM3;MCM6;HMGN2;RRM2;E2F1;POLA1;DHFR;E2F8;ATAD5;HELLS;ZNF850;DTL;CDC6;UHRF1;FBXO5;RANBP1;TRIM59;TUBA1B;NASP;ZIC5;IRX4;CCDC109B;CDC25A;HIST1H3G;KIF15;KIAA1274;PIM1;TOPBP1;MMP16;MCM2;PHF17;FAM161A;EZH2;RNF219;DUSP9;ZNF232;HIST1H2BJ;DLL1;CLSPN;LMNB1;MCM7;MCM8;MCM5;LHX2;DPYSL2;POLE;GAS2L3;NR2C2AP;POLA2;DMC1;CDT1;GINS1;PPIL5;FZD8;UNG;JPH1;CDK1;TYRO3;PRKDC;JAG2;DTYMK;SIX2;RFWD3;HSPA12A…	3;5;7;10;21;23;27;30;32;42;45;46;49;51;54;59;61;74;87;102;122;129;134;138;149;153;159;163;173;176;188;222;238;250;252;259;269;277;279;301;306;328;376;383;384;385;399;412;414;433;439;457;458;487;488;510;546;548;559;572;602;608;706;720;731;742;746;767;778;794;796;797;830;838;901;936;970;972;1015;1016;1019;1035;1044;1062;1065;1114;1155;1164;1216;1223;1264;1278;1287;1288;1303;1311;1313;1337;1389;1396…
RNAseq_downregulated_genes	32	wgEncodeSydhTfbsMcf10aesE2f4TamHvdPk.narrowPeak.gz	E2F4/MCF10A-Er-Src/4OHTAM_1uM_36hr	E2F4	hg19-tss-centered-10kb-chip-encode-taipale-inhouse	0.124151	6.83362	ZNF367;TMEM121;C16orf59;GINS2;THOC4;SIVA1;DDX12;CCHCR1;E2F1;TCF19;NCAPG2;CDT1;CTSL2;XRCC3;CENPM;TACC3;PHF17;SMC4;C9orf140;NUDT1;ASF1B;C21orf58;MYBL2;FANCA;HMGB2;DDX11;TROAP;H2AFX;CDCA4;TFAP4;TFDP1;YBX2;DSN1;FAM83D;UNG;JAG2;SMPD4;FAM111B;FAM72D;NFKBID;SLBP;TIMELESS;HIST1H2BJ;MCM7;FANCB;GSTCD;FAM64A;CHTF18;MSH5;BIRC5;RRM1;ARHGAP11A;PLK1;FOXM1;C12orf32;ODF2;C9orf40;KLF11;TK1;TMEM194A;CDCA5;CDCA8;TRA…	ZNF367;TMEM121;C16orf59;GINS2;THOC4;SIVA1;DDX12;CCHCR1;E2F1;TCF19;NCAPG2;CDT1;CTSL2;XRCC3;CENPM;TACC3;PHF17;SMC4;C9orf140;NUDT1;ASF1B;C21orf58;MYBL2;FANCA;HMGB2;DDX11;TROAP;H2AFX;CDCA4;TFAP4;TFDP1;YBX2;DSN1;FAM83D;UNG;JAG2;SMPD4;FAM111B;FAM72D;NFKBID;SLBP;TIMELESS;HIST1H2BJ;MCM7;FANCB;GSTCD;FAM64A;CHTF18;MSH5;BIRC5;RRM1;ARHGAP11A;PLK1;FOXM1;C12orf32;ODF2;C9orf40;KLF11;TK1;TMEM194A;CDCA5;CDCA8;TRA…	5;6;7;8;10;12;13;18;19;20;21;22;25;31;35;37;40;42;45;48;50;53;56;57;58;59;74;76;77;78;83;85;90;91;92;95;98;101;103;104;106;110;111;114;118;119;124;128;132;139;142;143;144;145;148;151;156;157;162;164;167;172;178;179;185;187;188;192;193;195;196;207;215;216;217;218;219;224;230;231;233;242;248;250;255;273;279;283;285;287;290;291;294;308;311;316;326;329;330;331;348;353;354;355;359;361;365;367;375;376;…
RNAseq_downregulated_genes	33	taipale-AATGGCGCCAAA-E2F1-DBD	AATGGCGCCAAA-E2F1-DBD	E2F3,E2F2,E2F1	hg19-tss-centered-10kb-10species	0.0489409	6.63833	PHF17;MCM6;RRM2;PIM1;CDC25A;GINS1;NASP;DMC1;E2F1;DNMT1;SMC4;FBXO5;CASP8AP2;ZIC5;EXOSC2;MCM7;ONECUT1;TIPIN;POLA1;DHFR;EXPH5;TP73;MCM5;UNG;E2F2;CLSPN;LMNB2;RELT;PBX3;IRX4;TOPBP1;NCAPH2;KIAA1274;MXD3;FAM161A;AKAP7;RAD51;WNT10B;HIST1H3G;ZNF232;MCM10;HSPA12A;POLE2;HNRNPAB;ORC1;ATAD2;HIST1H2BJ;SLC10A3;MCM2;SPSB4;CCDC21;SHCBP1;NUP160;C12orf34;CCDC109B;CDCA7;TRIM59;NRGN;CENPF;KIF11;RBL1;AADAT;STMN1;ZNF36…	PHF17;MCM6;RRM2;PIM1;CDC25A;GINS1;NASP;DMC1;E2F1;DNMT1;SMC4;FBXO5;CASP8AP2;ZIC5;EXOSC2;MCM7;ONECUT1;TIPIN;POLA1;DHFR;EXPH5;TP73;MCM5;UNG;E2F2;CLSPN;LMNB2;RELT;PBX3;IRX4;TOPBP1;NCAPH2;KIAA1274;MXD3;FAM161A;AKAP7;RAD51;WNT10B;HIST1H3G;ZNF232;MCM10;HSPA12A;POLE2;HNRNPAB;ORC1;ATAD2;HIST1H2BJ;SLC10A3;MCM2;SPSB4;CCDC21;SHCBP1;NUP160;C12orf34;CCDC109B;CDCA7;TRIM59;NRGN;CENPF;KIF11;RBL1;AADAT;STMN1;ZNF36…	1;3;4;6;8;9;10;14;19;21;22;23;24;27;28;32;38;47;56;65;69;84;104;119;120;121;141;172;177;187;193;217;229;258;266;294;315;319;328;338;349;351;373;380;387;393;408;419;430;487;516;520;537;560;587;588;610;639;658;667;713;731;762;768;770;778;787;807;812;822;824;829;830;833;839;847;872;897;903;909;918;925;931;934;951;1023;1033;1040;1047;1095;1177;1205;1274;1293;1314;1315;1323;1366;1416;1419;1421;1424;14…
RNAseq_downregulated_genes	34	GSM1208730_batch2_chrom1_LoVo_E2F7_PassedQC_peaks_hg19	E2F7/Lovo	E2F7	hg19-tss-centered-10kb-chip-encode-taipale-inhouse	0.119375	6.51705	RRM2;UNG;MCM5;E2F2;CHEK1;CDCA7;DUT;WDR76;SLBP;MCM3;ZNF367;RAD51;MCM4;MCM6;RBL1;CDC6;ARL6IP6;PRKDC;MCM7;SIVA1;ATAD2;NOLC1;DNMT1;CENPM;TK1;MTHFD1;TIPIN;PIM1;USP37;DTL;CASP8AP2;RFC2;NASP;TIMELESS;RFC4;CDC25A;SMC3;DHFR;CDC45;MCM2;POLA1;RIF1;TMEM194A;LMNB1;HELLS;C12orf34;RAD54L;POLD1;RPA2;MSH2;MYO19;PIGW;RTTN;PRIM1;RFWD3;MSH6;E2F8;CENPH;CENPN;XRCC2;GMNN;ASF1B;DDX11;FANCC;PAQR4;HMGB2;GINS2;CD3EAP;CDCA7…	RRM2;UNG;MCM5;E2F2;CHEK1;CDCA7;DUT;WDR76;SLBP;MCM3;ZNF367;RAD51;MCM4;MCM6;RBL1;CDC6;ARL6IP6;PRKDC;MCM7;SIVA1;ATAD2;NOLC1;DNMT1;CENPM;TK1;MTHFD1;TIPIN;PIM1;USP37;DTL;CASP8AP2;RFC2;NASP;TIMELESS;RFC4;CDC25A;SMC3;DHFR;CDC45;MCM2;POLA1;RIF1;TMEM194A;LMNB1;HELLS;C12orf34;RAD54L;POLD1;RPA2;MSH2;MYO19;PIGW;RTTN;PRIM1;RFWD3;MSH6;E2F8;CENPH;CENPN;XRCC2;GMNN;ASF1B;DDX11;FANCC;PAQR4;HMGB2;GINS2;CD3EAP;CDCA7…	1;3;5;6;7;8;10;11;14;15;17;18;20;21;24;26;27;29;30;31;34;35;37;39;41;42;44;45;47;50;52;53;56;58;60;62;65;66;72;76;79;82;84;88;91;95;96;98;99;100;102;103;106;107;109;112;117;118;129;132;135;142;143;144;145;151;156;159;166;167;168;169;171;173;182;184;190;191;196;201;204;207;208;224;234;241;253;260;264;265;272;275;278;313;314;315;316;322;332;336;338;345;346;350;351;352;354;359;363;364;365;383;384;38…
RNAseq_downregulated_genes	35	transfac_pro-M00736	V$E2F1DP1_01	E2F7,E2F6,E2F5,E2F4,E2F3,E2F2,E2F1	hg19-tss-centered-10kb-10species	0.0475067	6.34463	MCM3;ZNF367;TUBA1B;E2F2;UHRF1;RBL1;E2F8;POLA1;NOLC1;RRM2;RANBP1;MCM7;HELLS;HIST1H3G;CCDC109B;LOC100128191;TMPO;IRX4;MCM6;E2F1;PRKDC;NASP;KIAA1274;KIAA0101;FANCC;ZNF695;MCM4;PHF17;ATAD5;FZD8;FGFR3;DUSP9;MMP16;LHX2;MCM2;DHFR;PIM1;ANKRD32;CDCA7;JPH1;GINS2;GAS2L3;C2CD4C;SSRP1;DLL1;JAG2;MCM5;HMGN2;FAM161A;CDT1;PRTFDC1;YBX2;ZNF232;TOPBP1;NPTX1;ZNF85;CDC6;MSH5;KIF1A;GINS3;CASP8AP2;ONECUT1;UNG;TFDP1;SLC3…	MCM3;ZNF367;TUBA1B;E2F2;UHRF1;RBL1;E2F8;POLA1;NOLC1;RRM2;RANBP1;MCM7;HELLS;HIST1H3G;CCDC109B;LOC100128191;TMPO;IRX4;MCM6;E2F1;PRKDC;NASP;KIAA1274;KIAA0101;FANCC;ZNF695;MCM4;PHF17;ATAD5;FZD8;FGFR3;DUSP9;MMP16;LHX2;MCM2;DHFR;PIM1;ANKRD32;CDCA7;JPH1;GINS2;GAS2L3;C2CD4C;SSRP1;DLL1;JAG2;MCM5;HMGN2;FAM161A;CDT1;PRTFDC1;YBX2;ZNF232;TOPBP1;NPTX1;ZNF85;CDC6;MSH5;KIF1A;GINS3;CASP8AP2;ONECUT1;UNG;TFDP1;SLC3…	3;5;6;7;10;12;17;19;23;28;39;62;63;64;72;75;78;79;83;94;101;104;134;160;161;162;165;175;178;187;194;198;211;257;299;315;326;333;344;362;366;383;416;426;429;449;454;455;463;468;479;493;517;519;525;561;607;620;643;655;664;667;679;698;708;709;728;745;753;759;765;776;813;822;843;846;847;848;851;854;856;863;874;886;898;918;920;938;953;961;969;1008;1038;1050;1052;1066;1094;1096;1099;1116;1136;1154;1158…
RNAseq_downregulated_genes	36	wgEncodeHaibTfbsSknshFoxm1sc502V0422111PkRep2.broadPeak.gz	FOXM1_(SC-502)/SK-N-SH/None	FOXM1	hg19-tss-centered-10kb-chip-encode-taipale-inhouse	0.116613	6.33396	HIST1H3G;GPSM2;CCNA2;CDKN3;CENPA;ARL6IP1;CCNB1;KPNA2;CDK1;RAD21;CENPF;GTSE1;FAM83D;CCNF;LMNB1;HJURP;TRIM59;RNF26;CDKN2D;CKAP2L;PTTG1;UBE2C;NUF2;KIF20A;C15orf23;HMGB2;CDC25B;TPX2;PLK1;KIF23;SCLT1;TROAP;PRC1;LMNB2;PHF19;C13orf34;MZT1;NEK2;CCNB2;MKI67;KIF18B;PHF17;ASPM;KIF11;RACGAP1;INCENP;EZH2;TNFAIP8L1;PRR11;UBE2S;KIF2C;CDCA2;GAS2L3;H2AFX;C12orf48;MXD3;CDKN2C;UBE2T;PRIM2;KIF18A;ECT2;TMPO;LOC100128…	HIST1H3G;GPSM2;CCNA2;CDKN3;CENPA;ARL6IP1;CCNB1;KPNA2;CDK1;RAD21;CENPF;GTSE1;FAM83D;CCNF;LMNB1;HJURP;TRIM59;RNF26;CDKN2D;CKAP2L;PTTG1;UBE2C;NUF2;KIF20A;C15orf23;HMGB2;CDC25B;TPX2;PLK1;KIF23;SCLT1;TROAP;PRC1;LMNB2;PHF19;C13orf34;MZT1;NEK2;CCNB2;MKI67;KIF18B;PHF17;ASPM;KIF11;RACGAP1;INCENP;EZH2;TNFAIP8L1;PRR11;UBE2S;KIF2C;CDCA2;GAS2L3;H2AFX;C12orf48;MXD3;CDKN2C;UBE2T;PRIM2;KIF18A;ECT2;TMPO;LOC100128…	4;6;8;10;12;13;16;17;18;22;23;25;27;28;30;31;32;33;35;36;38;39;40;41;44;45;48;49;51;52;54;55;56;57;58;59;60;66;68;69;70;71;75;78;80;87;89;90;92;95;97;99;104;109;114;115;119;125;128;132;136;138;139;140;141;143;144;148;151;157;158;160;171;174;178;180;188;189;190;193;199;204;205;207;211;219;227;232;238;246;250;255;257;259;263;267;269;289;291;292;297;306;308;310;313;315;320;322;331;335;344;346;351;35…
RNAseq_downregulated_genes	37	wgEncodeHaibTfbsEcc1Foxm1sc502V0422111PkRep1.broadPeak.gz	FOXM1_(SC-502)/ECC-1/None	FOXM1	hg19-tss-centered-10kb-chip-encode-taipale-inhouse	0.116507	6.32693	ARL6IP1;GPSM2;CDK1;CKAP2L;CENPF;RNF26;CCNB1;FAM83D;CDKN3;CCNA2;TROAP;C15orf23;UBE2C;KPNA2;ASPM;RAD21;LMNB2;CENPA;CDC25B;TPX2;PRR11;HMGB2;MZT1;C13orf34;RACGAP1;LMNB1;PTTG1;HJURP;CCNB2;OIP5;NUSAP1;AMIGO2;TUBA1C;SCLT1;NUF2;CCNF;GTSE1;TRIM59;PLK1;PRC1;MKI67;KIF23;INCENP;NEK2;TOP2A;KIF2C;KIF20A;KIF11;TTF2;UBE2T;SLC39A8;KIF20B;FLJ37201;ECT2;C12orf48;UBE2S;GAS2L3;KIF18A;CDCA2;H2AFX;MXD3;CEP55;SMC4;AURKA…	ARL6IP1;GPSM2;CDK1;CKAP2L;CENPF;RNF26;CCNB1;FAM83D;CDKN3;CCNA2;TROAP;C15orf23;UBE2C;KPNA2;ASPM;RAD21;LMNB2;CENPA;CDC25B;TPX2;PRR11;HMGB2;MZT1;C13orf34;RACGAP1;LMNB1;PTTG1;HJURP;CCNB2;OIP5;NUSAP1;AMIGO2;TUBA1C;SCLT1;NUF2;CCNF;GTSE1;TRIM59;PLK1;PRC1;MKI67;KIF23;INCENP;NEK2;TOP2A;KIF2C;KIF20A;KIF11;TTF2;UBE2T;SLC39A8;KIF20B;FLJ37201;ECT2;C12orf48;UBE2S;GAS2L3;KIF18A;CDCA2;H2AFX;MXD3;CEP55;SMC4;AURKA…	1;2;3;7;8;10;11;13;14;15;16;17;19;20;21;24;26;27;29;32;33;37;43;44;45;48;49;52;55;56;57;60;61;63;66;67;69;70;72;73;75;76;83;87;90;91;94;95;97;99;105;106;107;113;115;119;120;129;144;145;148;155;165;167;169;170;172;174;176;190;193;205;213;215;216;217;218;242;249;251;254;255;256;264;268;272;273;274;282;290;296;305;313;314;326;347;350;353;356;368;370;378;384;398;404;406;407;410;414;420;431;434;442;44…
RNAseq_downregulated_genes	38	taipale-NNTTTTGGCGCCAAAANN-E2F3-DBD	NNTTTTGGCGCCAAAANN-E2F3-DBD		hg19-tss-centered-10kb-10species	0.047107	6.26276	PHF17;NASP;UNG;MCM6;C12orf34;MCM2;DNMT1;E2F8;SMC4;E2F1;LMNB2;PIM1;MCM7;MCM5;GINS1;FBXO5;CHEK1;DHFR;GPR19;NCAPH2;ZIC5;UHRF1;RRM2;MXD3;ORC1;ATAD2;DMC1;TIPIN;CENPQ;LBR;HIST1H2BJ;MND1;E2F2;ECT2;EXPH5;MMD;C17orf53;ZNF93;ATAD5;HAUS6;WDR76;DOK1;CLSPN;HAUS3;TYRO3;C1orf112;DNAJC9;C14orf145;PKMYT1;MTHFD1;LOXL3;KIF15;OSBPL6;GMNN;GABRB2;TP73;TFCP2L1;NUP188;NAV1;SCML2;PITX1;SKA3;FAM111B;TELO2;TCF7L1;PRTFDC1;D…	PHF17;NASP;UNG;MCM6;C12orf34;MCM2;DNMT1;E2F8;SMC4;E2F1;LMNB2;PIM1;MCM7;MCM5;GINS1;FBXO5;CHEK1;DHFR;GPR19;NCAPH2;ZIC5;UHRF1;RRM2;MXD3;ORC1;ATAD2;DMC1;TIPIN;CENPQ;LBR;HIST1H2BJ;MND1;E2F2;ECT2;EXPH5;MMD;C17orf53;ZNF93;ATAD5;HAUS6;WDR76;DOK1;CLSPN;HAUS3;TYRO3;C1orf112;DNAJC9;C14orf145;PKMYT1;MTHFD1;LOXL3;KIF15;OSBPL6;GMNN;GABRB2;TP73;TFCP2L1;NUP188;NAV1;SCML2;PITX1;SKA3;FAM111B;TELO2;TCF7L1;PRTFDC1;D…	1;2;5;6;7;8;12;15;17;18;25;26;27;30;31;33;35;38;43;46;53;56;74;81;93;99;100;103;106;138;141;160;168;216;223;252;263;270;274;297;366;414;482;493;552;556;581;589;595;596;606;617;631;651;664;683;690;691;692;697;722;787;788;792;807;823;853;855;862;873;892;952;962;967;974;982;1004;1011;1019;1025;1055;1062;1086;1099;1100;1106;1144;1151;1152;1171;1202;1216;1254;1260;1283;1288;1292;1294;1295;1320;1325;13…
RNAseq_downregulated_genes	39	transfac_pro-M01840	P$E2L1_Q2	TFDP3,E2F4,E2F3,TFDP1,E2F1	hg19-tss-centered-10kb-10species	0.0470994	6.26121	ZNF367;UNG;E2F1;NASP;PHF17;MCM3;PIM1;JPH1;MCM10;C12orf34;E2F2;RANBP1;MCM5;UHRF1;CASP8AP2;LOC100128191;TMPO;MCM6;RRM2;MCM4;DNMT1;PRKDC;FAM161A;CDC25A;ZIC5;MCM2;SIX2;E2F8;HMGB1;TRIM59;CHEK1;GJB2;ATAD5;ZNF232;HMGN2;WDR76;DHFR;MCM8;TYRO3;RFWD3;GAS2L3;HMGB2;FZD8;PPIL5;MCM7;SSRP1;RNF219;RBL1;TFDP1;G2E3;MSH5;EZH2;PKMYT1;GINS2;IRX4;DLEU2;PITX1;RBPMS2;C18orf54;CCDC109B;TIPIN;NR2F1;CHAF1A;HELLS;TCF19;RELT;…	ZNF367;UNG;E2F1;NASP;PHF17;MCM3;PIM1;JPH1;MCM10;C12orf34;E2F2;RANBP1;MCM5;UHRF1;CASP8AP2;LOC100128191;TMPO;MCM6;RRM2;MCM4;DNMT1;PRKDC;FAM161A;CDC25A;ZIC5;MCM2;SIX2;E2F8;HMGB1;TRIM59;CHEK1;GJB2;ATAD5;ZNF232;HMGN2;WDR76;DHFR;MCM8;TYRO3;RFWD3;GAS2L3;HMGB2;FZD8;PPIL5;MCM7;SSRP1;RNF219;RBL1;TFDP1;G2E3;MSH5;EZH2;PKMYT1;GINS2;IRX4;DLEU2;PITX1;RBPMS2;C18orf54;CCDC109B;TIPIN;NR2F1;CHAF1A;HELLS;TCF19;RELT;…	2;3;5;8;13;14;15;16;24;28;33;36;40;45;49;64;70;71;77;78;79;80;82;89;94;96;97;126;128;132;144;178;195;206;207;209;219;236;275;300;327;382;414;462;477;492;555;584;592;606;609;616;682;683;706;719;740;755;788;809;811;823;830;835;855;867;873;902;925;935;937;944;959;970;1048;1064;1095;1096;1122;1129;1142;1160;1164;1165;1175;1180;1237;1262;1264;1265;1305;1358;1360;1372;1375;1388;1393;1401;1453;1454;1491…
RNAseq_downregulated_genes	40	taipale-NNTTTTGGCGCCAAAANN-E2F2-DBD	NNTTTTGGCGCCAAAANN-E2F2-DBD	E2F2	hg19-tss-centered-10kb-10species	0.0467944	6.19874	NASP;PHF17;DNMT1;UNG;C12orf34;E2F8;E2F1;LMNB2;GINS1;MCM2;GPR19;SMC4;MCM6;RRM2;MCM5;PIM1;ATAD2;CDC25A;ZIC5;DHFR;CHEK1;FBXO5;MXD3;MND1;EXPH5;NCAPH2;ECT2;HIST1H2BJ;TIPIN;LBR;RNF145;MCM7;CASP8AP2;E2F2;MCM8;UHRF1	NASP;PHF17;DNMT1;UNG;C12orf34;E2F8;E2F1;LMNB2;GINS1;MCM2;GPR19;SMC4;MCM6;RRM2;MCM5;PIM1;ATAD2;CDC25A;ZIC5;DHFR;CHEK1;FBXO5;MXD3;MND1;EXPH5;NCAPH2;ECT2;HIST1H2BJ;TIPIN;LBR;RNF145;MCM7;CASP8AP2;E2F2;MCM8;UHRF1;COCH;PKMYT1;MMD;C14orf145;C17orf53;WDR76;SKA3;MTFP1;DOK1;HAUS6;TMEM38B;SLC25A28;DMC1;PITX1;HAUS3;MTHFD1;LOXL3;ORC1;C3orf26;DNAJC9;POLR3G;C1orf112;PRIMA1;DLGAP5;TFCP2L1;HUNK;FAM111B;ATAD5;GABR…	1;2;3;7;9;14;15;19;22;23;26;30;31;32;37;43;49;53;58;66;67;77;83;90;121;126;154;162;172;176;185;193;208;214;220;235;254;288;319;357;408;412;422;427;465;469;531;545;552;559;562;604;619;664;743;750;751;762;768;794;803;839;860;931;947;955;960;995;1000;1004;1011;1036;1065;1105;1135;1203;1241;1265;1295;1320;1321;1323;1333;1338;1351;1394;1410;1490;1511;1560;1564;1577;1622;1684;1705;1715;1741;1747;1821;1…
RNAseq_downregulated_genes	41	transfac_pro-M01114	P$E2F_Q2	E2F7,E2F4,E2F1	hg19-tss-centered-10kb-10species	0.046622	6.16344	ZNF367;MCM3;UHRF1;TUBA1B;E2F2;E2F1;HMGB1;RANBP1;CDCA7;FANCC;NASP;CCDC109B;HMGN2;RRM2;LOC100128191;TMPO;UNG;HNRNPD;ZIC5;TFAP4;TYRO3;HIST1H2BJ;E2F8;MCM5;RFWD3;FZD8;MCM8;KIAA0101;SSRP1;PIM1;DUSP9;JPH1;SIX2;IRX4;NUP107;ZNF232;TOPBP1;CASP8AP2;PASK;CDT1;PHF17;HIST1H3G;FBXO5;RBL1;KIAA1274;C2CD4C;CENPH;DLL1;NR2F1;ATAD5;HAUS7;ANKRD32;PRKDC;SRR;JAG2;MXD3;C12orf34;ATAD2;CDKN2D;NOLC1;TIMELESS;KDELC2;GAS2L3;R…	ZNF367;MCM3;UHRF1;TUBA1B;E2F2;E2F1;HMGB1;RANBP1;CDCA7;FANCC;NASP;CCDC109B;HMGN2;RRM2;LOC100128191;TMPO;UNG;HNRNPD;ZIC5;TFAP4;TYRO3;HIST1H2BJ;E2F8;MCM5;RFWD3;FZD8;MCM8;KIAA0101;SSRP1;PIM1;DUSP9;JPH1;SIX2;IRX4;NUP107;ZNF232;TOPBP1;CASP8AP2;PASK;CDT1;PHF17;HIST1H3G;FBXO5;RBL1;KIAA1274;C2CD4C;CENPH;DLL1;NR2F1;ATAD5;HAUS7;ANKRD32;PRKDC;SRR;JAG2;MXD3;C12orf34;ATAD2;CDKN2D;NOLC1;TIMELESS;KDELC2;GAS2L3;R…	4;6;7;9;10;11;40;46;50;54;55;89;100;106;109;111;123;137;143;155;162;170;175;176;203;209;221;232;239;247;251;252;258;266;270;282;289;291;340;349;356;361;374;387;394;413;416;419;427;430;439;467;486;490;512;524;544;619;626;660;681;682;701;713;717;768;776;787;799;801;812;855;857;860;869;873;908;912;913;917;920;936;945;961;990;1023;1037;1098;1129;1131;1153;1167;1190;1207;1214;1216;1225;1233;1274;1312;…
RNAseq_downregulated_genes	42	transfac_pro-M00426	V$E2F_Q4	E2F7,E2F5,E2F4,E2F3,E2F2,E2F1,TFDP3,TFDP1	hg19-tss-centered-10kb-10species	0.0454455	5.9225	E2F2;RBL1;ZNF367;MCM3;E2F1;RRM2;MCM6;HMGN2;ZNF850;DHFR;POLA1;ATAD5;DTL;CDC6;E2F8;UHRF1;TRIM59;ZIC5;RANBP1;HELLS;FBXO5;NASP;CCDC109B;EZH2;CDC25A;KIF15;IRX4;FAM161A;PHF17;TOPBP1;CLSPN;RNF219;HIST1H3G;TUBA1B;DUSP9;ZNF232;MCM2;GAS2L3;HIST1H2BJ;MCM8;DPYSL2;DLL1;POLE;PIM1;KIAA1274;PPIL5;NR2C2AP;TYRO3;MCM7;GINS1;POLA2;CDT1;MCM5;SIX2;CASC5;BRI3BP;FZD8;DNMT1;UNG;DMC1;LHX2;HSPA12A;JAG2;JPH1;RADIL;PHF19;DTY…	E2F2;RBL1;ZNF367;MCM3;E2F1;RRM2;MCM6;HMGN2;ZNF850;DHFR;POLA1;ATAD5;DTL;CDC6;E2F8;UHRF1;TRIM59;ZIC5;RANBP1;HELLS;FBXO5;NASP;CCDC109B;EZH2;CDC25A;KIF15;IRX4;FAM161A;PHF17;TOPBP1;CLSPN;RNF219;HIST1H3G;TUBA1B;DUSP9;ZNF232;MCM2;GAS2L3;HIST1H2BJ;MCM8;DPYSL2;DLL1;POLE;PIM1;KIAA1274;PPIL5;NR2C2AP;TYRO3;MCM7;GINS1;POLA2;CDT1;MCM5;SIX2;CASC5;BRI3BP;FZD8;DNMT1;UNG;DMC1;LHX2;HSPA12A;JAG2;JPH1;RADIL;PHF19;DTY…	4;5;8;21;24;25;26;32;38;41;42;46;52;57;78;80;83;115;131;138;143;144;175;183;191;198;200;208;217;224;238;240;248;295;301;319;323;325;330;334;388;395;404;413;416;419;421;432;466;491;494;508;573;578;590;662;682;697;706;734;740;747;752;767;824;841;845;884;938;946;947;949;958;959;961;963;978;980;1033;1041;1044;1080;1113;1117;1148;1151;1160;1175;1185;1186;1197;1198;1204;1221;1227;1228;1245;1265;1305;13…
RNAseq_downregulated_genes	43	yetfasco-486	YDL170W		hg19-tss-centered-10kb-10species	0.0450647	5.84452	PLK4;FOXD2;ADD3;LHX2;HMGN2;RFWD3;E2F8;RNF219;PIM1;GJB2;TUBA1B;NOLC1;FBXO5;DCLRE1A;CHAF1A;HIST1H3G;DLL1;FAM161A;PHF17;KNTC1;SSRP1;PTGER2;IRX4;KIAA0101;FAM72B;FAM72D;FANCC;RBPMS2;FAM72A;NR2F1;CASP8AP2;STMN1;NFIX;IMPA2;EZH2;PBK;GAS2L3;RANBP1;NES;EEPD1;RAD21;ATAD2;HMGB2;MSH5;DUSP9;SOX18;STARD8;KLF11;CCNA2;MCM7;RNF145;NCAPG;CCDC109B;WDR76;KIAA1274;SLC25A28;LOC254559;PRIMA1;E2F2;ZIC5;TMEM191A;PRKDC;TRI…	PLK4;FOXD2;ADD3;LHX2;HMGN2;RFWD3;E2F8;RNF219;PIM1;GJB2;TUBA1B;NOLC1;FBXO5;DCLRE1A;CHAF1A;HIST1H3G;DLL1;FAM161A;PHF17;KNTC1;SSRP1;PTGER2;IRX4;KIAA0101;FAM72B;FAM72D;FANCC;RBPMS2;FAM72A;NR2F1;CASP8AP2;STMN1;NFIX;IMPA2;EZH2;PBK;GAS2L3;RANBP1;NES;EEPD1;RAD21;ATAD2;HMGB2;MSH5;DUSP9;SOX18;STARD8;KLF11;CCNA2;MCM7;RNF145;NCAPG;CCDC109B;WDR76;KIAA1274;SLC25A28;LOC254559;PRIMA1;E2F2;ZIC5;TMEM191A;PRKDC;TRI…	2;8;42;48;50;61;73;105;107;110;121;125;129;150;152;161;162;167;171;181;190;199;236;239;241;242;247;250;252;265;266;268;275;310;319;345;350;359;360;369;381;400;403;405;419;427;450;452;471;475;476;480;482;503;509;514;515;530;536;537;541;574;576;578;616;618;629;633;643;649;657;667;671;689;692;703;713;721;727;773;784;795;799;801;805;806;812;844;849;855;860;911;928;974;986;990;1013;1044;1047;1072;1099…
RNAseq_downregulated_genes	44	jaspar-MA0410.1	UGA3		hg19-tss-centered-10kb-10species	0.0450192	5.83521	PLK4;FOXD2;ADD3;LHX2;HMGN2;RFWD3;E2F8;RNF219;PIM1;GJB2;TUBA1B;NOLC1;FBXO5;DCLRE1A;CHAF1A;DLL1;HIST1H3G;FAM161A;PHF17;KNTC1;SSRP1;PTGER2;IRX4;FAM72B;FAM72D;KIAA0101;RBPMS2;FAM72A;FANCC;CASP8AP2;NR2F1;NFIX;STMN1;EZH2;IMPA2;PBK;RANBP1;NES;GAS2L3;EEPD1;RAD21;MSH5;ATAD2;HMGB2;DUSP9;SOX18;STARD8;KLF11;MCM7;RNF145;CCDC109B;CCNA2;WDR76;NCAPG;KIAA1274;LOC254559;SLC25A28;ZIC5;PRIMA1;TMEM191A;E2F2;TRIM59;AL…	PLK4;FOXD2;ADD3;LHX2;HMGN2;RFWD3;E2F8;RNF219;PIM1;GJB2;TUBA1B;NOLC1;FBXO5;DCLRE1A;CHAF1A;DLL1;HIST1H3G;FAM161A;PHF17;KNTC1;SSRP1;PTGER2;IRX4;FAM72B;FAM72D;KIAA0101;RBPMS2;FAM72A;FANCC;CASP8AP2;NR2F1;NFIX;STMN1;EZH2;IMPA2;PBK;RANBP1;NES;GAS2L3;EEPD1;RAD21;MSH5;ATAD2;HMGB2;DUSP9;SOX18;STARD8;KLF11;MCM7;RNF145;CCDC109B;CCNA2;WDR76;NCAPG;KIAA1274;LOC254559;SLC25A28;ZIC5;PRIMA1;TMEM191A;E2F2;TRIM59;AL…	2;8;42;45;47;59;72;104;105;116;119;126;132;148;153;162;167;168;170;181;194;198;236;242;243;246;252;253;257;261;266;267;268;303;314;350;352;356;357;366;384;393;400;408;415;424;443;446;470;473;479;480;499;501;505;510;512;533;536;538;568;577;584;595;599;607;635;638;641;657;658;662;674;691;702;707;709;710;728;765;774;780;781;790;803;809;811;845;848;863;878;918;977;980;997;1004;1023;1031;1058;1067;112…
RNAseq_downregulated_genes	45	wgEncodeHaibTfbsMcf7Foxm1sc502V0422111PkRep1.broadPeak.gz	FOXM1_(SC-502)/MCF-7/None	FOXM1	hg19-tss-centered-10kb-chip-encode-taipale-inhouse	0.106797	5.68336	CDKN3;FAM83D;CDK1;HIST1H3G;GPSM2;CCNB1;ARL6IP1;UBE2C;RAD21;KPNA2;CENPA;LMNB1;RNF26;PRR11;HMGB2;KIF23;C15orf23;CCNF;TRIM59;TROAP;CDC25B;CENPF;PTTG1;TUBB2C;TUBA1C;RACGAP1;CKAP2L;NUF2;CCNA2;MZT1;ECT2;C13orf34;CDKN2D;PRC1;HJURP;KIF20A;NCAPH;MKI67;ASPM;TOP2A;TTF2;BIRC5;KIF11;CCNB2;GTSE1;LBR;GAS2L3;C12orf48;TPX2;SUN2;KIF18B;MXD3;H2AFX;PLK1;KIF2C;UBE2S;KIF18A;UBE2T;TNFAIP8L1;LMNB2;FAM64A;CEP55;FBXO5;INC…	CDKN3;FAM83D;CDK1;HIST1H3G;GPSM2;CCNB1;ARL6IP1;UBE2C;RAD21;KPNA2;CENPA;LMNB1;RNF26;PRR11;HMGB2;KIF23;C15orf23;CCNF;TRIM59;TROAP;CDC25B;CENPF;PTTG1;TUBB2C;TUBA1C;RACGAP1;CKAP2L;NUF2;CCNA2;MZT1;ECT2;C13orf34;CDKN2D;PRC1;HJURP;KIF20A;NCAPH;MKI67;ASPM;TOP2A;TTF2;BIRC5;KIF11;CCNB2;GTSE1;LBR;GAS2L3;C12orf48;TPX2;SUN2;KIF18B;MXD3;H2AFX;PLK1;KIF2C;UBE2S;KIF18A;UBE2T;TNFAIP8L1;LMNB2;FAM64A;CEP55;FBXO5;INC…	4;6;7;9;11;12;18;24;26;29;31;32;33;34;38;42;44;47;48;51;54;62;63;66;68;69;70;71;72;75;76;77;80;83;86;89;90;91;93;95;103;104;106;107;118;125;126;128;131;133;134;136;138;142;146;149;152;154;157;158;161;162;166;172;179;181;189;197;199;205;207;214;215;226;228;232;234;236;248;256;266;267;268;269;270;280;289;299;313;333;342;351;353;357;365;366;367;376;383;385;395;396;398;401;410;434;435;443;448;469;478…
RNAseq_downregulated_genes	46	wgEncodeHaibTfbsPanc1Sin3ak20V0416101PkRep2.broadPeak.gz	Sin3Ak-20/PANC-1/None	SIN3A	hg19-tss-centered-10kb-chip-encode-taipale-inhouse	0.106036	5.63288	ANLN;UNG;KIF2C;C11orf82;FANCI;FAM54A;DTL;CKAP2L;FLJ37201;KIF20B;MCM7;NEK2;NUF2;BLM;FBXO5;FAM161A;DBF4;KIAA1524;POLQ;KIF24;TAF5;MLF1IP;TPX2;IQGAP3;RAD51;CDC6;TTK;SMC4;CCNB2;CDC20;CDCA5;CDK1;EXO1;AURKA;HELLS;DEPDC1;NCAPD3;RRM2;ANKRD32;E2F8;ATAD5;CDKN2C;CENPF;C15orf42;SHCBP1;ORC1;MCM4;PRKDC;CEP55;RAD54L;BUB1B;CCNB1;CENPQ;PRIM2;C16orf75;DNAJC9;KIF23;ORC3;HMMR;CCNA2;CCNE2;TMEM194A;C3orf26;RTKN2;POLD3;…	ANLN;UNG;KIF2C;C11orf82;FANCI;FAM54A;DTL;CKAP2L;FLJ37201;KIF20B;MCM7;NEK2;NUF2;BLM;FBXO5;FAM161A;DBF4;KIAA1524;POLQ;KIF24;TAF5;MLF1IP;TPX2;IQGAP3;RAD51;CDC6;TTK;SMC4;CCNB2;CDC20;CDCA5;CDK1;EXO1;AURKA;HELLS;DEPDC1;NCAPD3;RRM2;ANKRD32;E2F8;ATAD5;CDKN2C;CENPF;C15orf42;SHCBP1;ORC1;MCM4;PRKDC;CEP55;RAD54L;BUB1B;CCNB1;CENPQ;PRIM2;C16orf75;DNAJC9;KIF23;ORC3;HMMR;CCNA2;CCNE2;TMEM194A;C3orf26;RTKN2;POLD3;…	14;16;22;28;30;31;42;44;47;49;52;53;54;56;59;62;63;67;74;77;78;84;87;88;89;91;95;110;114;119;121;130;132;135;137;138;141;144;147;148;152;154;159;161;165;166;179;180;185;195;196;200;203;205;214;216;219;224;229;231;233;235;236;237;238;242;243;246;247;248;249;252;255;258;262;264;265;271;273;281;284;285;293;295;299;312;313;325;344;351;354;356;359;360;361;369;370;372;376;380;382;385;390;396;400;412;42…
RNAseq_downregulated_genes	47	taipale-NNAAATGGCGCCAAAANN-E2F3-DBD	NNAAATGGCGCCAAAANN-E2F3-DBD		hg19-tss-centered-10kb-10species	0.0437215	5.56944	PIM1;PHF17;SMC4;NASP;NCAPH2;ZIC5;MCM7;MCM6;LMNB2;RBL1;FBXO5;MCM5;E2F1;DHFR;MCM2;DNMT1;CLSPN;USP1;MCM8;PRIMA1;GMNN;C12orf34;PPIL5;ANP32E;GINS1;LOC254559;RAD51;HIST1H2BJ;TIPIN;AKAP7;CENPQ;ORC1;AADAT;LBR;WDR76;DPYSL2;DUT;DSCC1	PIM1;PHF17;SMC4;NASP;NCAPH2;ZIC5;MCM7;MCM6;LMNB2;RBL1;FBXO5;MCM5;E2F1;DHFR;MCM2;DNMT1;CLSPN;USP1;MCM8;PRIMA1;GMNN;C12orf34;PPIL5;ANP32E;GINS1;LOC254559;RAD51;HIST1H2BJ;TIPIN;AKAP7;CENPQ;ORC1;AADAT;LBR;WDR76;DPYSL2;DUT;DSCC1;PTTG2;SPSB4;ATAD5;FAM72B;FAM72D;FAM72A;SUV39H1;HNRNPD;ZNF695;ATAD2;ALG10;ECT2;HAUS6;GPR19;DNMT3B;ZBTB2;HJURP;NPR3;HYLS1;SUV39H2;DONSON;LOC642846;CENPL;NUP188;ZNF85;TNFAIP8L1;S…	2;3;5;10;15;18;21;23;31;32;38;45;54;59;61;66;67;72;73;74;75;99;127;139;160;172;182;194;200;214;222;223;245;248;249;259;279;282;317;381;409;488;491;499;554;558;563;572;582;696;697;701;722;739;761;783;842;914;932;959;981;989;1007;1061;1075;1081;1101;1108;1125;1155;1173;1203;1205;1213;1243;1252;1255;1268;1307;1361;1362;1428;1432;1448;1487;1523;1536;1616;1653;1654;1661;1664;1680;1735;1791;1803;1828;1…
RNAseq_downregulated_genes	48	transfac_public-M00288	F$HAP234_01	NFYB,NFYA,POLE3	hg19-tss-centered-10kb-10species	0.0436779	5.56052	HIST1H3G;HIST2H2AC;CDCA2;H2AFX;CDC25A;PRR11;TOMM40;ATAD2;CENPM;FAM72A;HIST1H2BJ;FAM72B;FAM72D;SHCBP1;FAM161A;XRCC3;CDKN3;CENPF;HMGB1;TOP2A;CCDC109B;GAS2L3;TUBB2C;CHAF1A;KIF24;C19orf40;TTF2;GRK6;C2orf7;C20orf27;MNX1;UBE2C;CDC6;SRR;CDC45;ZNF695;EZH2;NUP62CL;RFWD3;NCAPD3;E2F8;ECT2;PASK;KPNA2;HMGB2;KCNH2;UNG;KIF20A;ARL6IP6;PIM1;STIL;CBX5;ERG;CDCA3;TRIM59;RACGAP1;C21orf58;CCNB2;NCAPD2;TFAP4;C13orf34;M…	HIST1H3G;HIST2H2AC;CDCA2;H2AFX;CDC25A;PRR11;TOMM40;ATAD2;CENPM;FAM72A;HIST1H2BJ;FAM72B;FAM72D;SHCBP1;FAM161A;XRCC3;CDKN3;CENPF;HMGB1;TOP2A;CCDC109B;GAS2L3;TUBB2C;CHAF1A;KIF24;C19orf40;TTF2;GRK6;C2orf7;C20orf27;MNX1;UBE2C;CDC6;SRR;CDC45;ZNF695;EZH2;NUP62CL;RFWD3;NCAPD3;E2F8;ECT2;PASK;KPNA2;HMGB2;KCNH2;UNG;KIF20A;ARL6IP6;PIM1;STIL;CBX5;ERG;CDCA3;TRIM59;RACGAP1;C21orf58;CCNB2;NCAPD2;TFAP4;C13orf34;M…	8;20;48;60;91;97;100;106;109;120;126;130;132;133;138;154;169;175;190;192;193;199;202;221;225;226;239;285;296;318;325;328;345;349;356;370;371;379;380;388;393;402;409;410;411;413;435;450;468;474;478;492;496;511;514;518;546;549;551;558;570;571;575;582;589;593;616;638;693;698;727;728;761;764;778;871;896;904;953;972;978;997;1008;1056;1074;1075;1103;1118;1142;1148;1161;1166;1205;1221;1222;1232;1260;126…
RNAseq_downregulated_genes	49	wgEncodeHaibTfbsSknshSin3ak20V0416101PkRep1.broadPeak.gz	Sin3Ak-20/SK-N-SH/None	SIN3A	hg19-tss-centered-10kb-chip-encode-taipale-inhouse	0.102834	5.42066	FAM72B;FAM72A;UNG;KIF2C;FAM72D;TMEM107;FAM54A;PRR11;NCAPG;FLJ37201;KIF20B;CDC20;DBF4;MCM7;NUF2;KIF20A;SHCBP1;SKA3;IQGAP3;CKAP2L;CENPP;RFC3;MAD2L1;DDX12;PPIH;CASC5;BRI3BP;HMGB1;KPNA2;GGH;TK1;MYBL1;KIF18B;NEK2;POLQ;NCAPG2;FANCD2;ESCO2;BIRC5;SASS6;DLGAP5;BUB1B;CCNB1;NUDT1;TTF2;MCM8;HJURP;RRM2;CCDC77;E2F8;ARHGAP11B;ZNF718;GTSE1;C15orf42;C11orf82;TROAP;CCNA2;POLE;XRCC2;CLSPN;MND1;GSG2;CDCA8;TAF5;C21or…	FAM72B;FAM72A;UNG;KIF2C;FAM72D;TMEM107;FAM54A;PRR11;NCAPG;FLJ37201;KIF20B;CDC20;DBF4;MCM7;NUF2;KIF20A;SHCBP1;SKA3;IQGAP3;CKAP2L;CENPP;RFC3;MAD2L1;DDX12;PPIH;CASC5;BRI3BP;HMGB1;KPNA2;GGH;TK1;MYBL1;KIF18B;NEK2;POLQ;NCAPG2;FANCD2;ESCO2;BIRC5;SASS6;DLGAP5;BUB1B;CCNB1;NUDT1;TTF2;MCM8;HJURP;RRM2;CCDC77;E2F8;ARHGAP11B;ZNF718;GTSE1;C15orf42;C11orf82;TROAP;CCNA2;POLE;XRCC2;CLSPN;MND1;GSG2;CDCA8;TAF5;C21or…	8;11;15;17;19;28;30;36;40;41;42;45;48;50;57;62;63;69;80;82;88;93;96;97;98;99;101;103;108;111;114;117;121;123;124;127;129;130;132;135;139;142;145;149;150;154;158;159;161;164;165;167;169;179;181;185;193;194;202;208;212;214;216;221;240;247;261;262;266;267;271;280;292;293;295;296;297;298;304;305;306;309;313;320;328;329;332;334;347;349;350;351;353;358;362;370;375;384;391;395;401;406;416;423;436;445;44…
RNAseq_downregulated_genes	50	yetfasco-1537	YOR358W	NFYC,NFYB,NFYA,POLE4	hg19-tss-centered-10kb-10species	0.0420865	5.23462	HMGB2;GAS2L3;HMGB1;CDKN3;CDC25A;FAM72B;FAM72D;TOMM40;FAM72A;CDC6;HIST1H3G;CENPM;FAM161A;KIF24;CENPF;ATAD2;H2AFX;FAM64A;MCM10;UHRF1;USP1;NEK2;ECT2;ZIC5;CCNB2;TUBB2C;PASK;PRR11;CIT;KPNA2;SHCBP1;LOC254559;CHTF18;UNG;DLL1;C20orf27;CDCA2;LBR;CDK1;CCDC109B;GRK6;HIST1H2BJ;E2F8;C21orf58;STIL;C19orf40;STMN1;TPX2;ARHGAP33;ASPM;EXOSC2;DTL;HIST2H2AC;TTF2;ARHGAP11A;XRCC3;DUSP7;KIF18B;NUP62CL;RFWD3;ATAD5;MNX1;…	HMGB2;GAS2L3;HMGB1;CDKN3;CDC25A;FAM72B;FAM72D;TOMM40;FAM72A;CDC6;HIST1H3G;CENPM;FAM161A;KIF24;CENPF;ATAD2;H2AFX;FAM64A;MCM10;UHRF1;USP1;NEK2;ECT2;ZIC5;CCNB2;TUBB2C;PASK;PRR11;CIT;KPNA2;SHCBP1;LOC254559;CHTF18;UNG;DLL1;C20orf27;CDCA2;LBR;CDK1;CCDC109B;GRK6;HIST1H2BJ;E2F8;C21orf58;STIL;C19orf40;STMN1;TPX2;ARHGAP33;ASPM;EXOSC2;DTL;HIST2H2AC;TTF2;ARHGAP11A;XRCC3;DUSP7;KIF18B;NUP62CL;RFWD3;ATAD5;MNX1;…	4;34;36;41;47;55;57;58;59;62;76;86;93;102;103;109;173;174;195;202;207;208;219;246;250;263;264;271;281;283;295;314;317;320;337;346;351;370;371;381;386;401;404;431;432;452;458;469;475;484;514;533;547;550;582;599;633;655;656;664;674;705;724;733;740;751;790;808;809;812;852;870;879;891;933;955;983;989;1007;1030;1046;1050;1053;1059;1079;1098;1110;1112;1115;1119;1144;1152;1168;1176;1196;1235;1241;1265;1…
RNAseq_downregulated_genes	51	transfac_public-M00287	V$NFY_01	NFYC,NFYB,NFYA,POLE4,POLE3,YBX1	hg19-tss-centered-10kb-10species	0.0420013	5.21716	HIST1H3G;TOMM40;H2AFX;HIST2H2AC;CDCA2;HIST1H2BJ;HMGB1;CENPF;GAS2L3;UNG;TUBB2C;HMGB2;PASK;CDKN3;PRR11;FAM72A;CDC45;FAM72B;FAM72D;CENPM;CDCA3;RFWD3;UBE2C;TOP2A;C2orf7;CCNB2;SHCBP1;MDC1;KIF24;ECT2;ERG;CDC25A;CBX5;WDR62;C19orf40;ATAD2;SLC25A28;TMEM97;C13orf34;E2F8;MCM10;USP1;TRIM59;XRCC3;CDC6;CHTF18;FAM161A;FAM64A;KIF20A;MZT1;NUP62CL;CKS1B;KPNA2;LOC254559;CDC20;STIL;KIF18B;HMMR;UHRF1;SNRNP25;NCAPD2;H…	HIST1H3G;TOMM40;H2AFX;HIST2H2AC;CDCA2;HIST1H2BJ;HMGB1;CENPF;GAS2L3;UNG;TUBB2C;HMGB2;PASK;CDKN3;PRR11;FAM72A;CDC45;FAM72B;FAM72D;CENPM;CDCA3;RFWD3;UBE2C;TOP2A;C2orf7;CCNB2;SHCBP1;MDC1;KIF24;ECT2;ERG;CDC25A;CBX5;WDR62;C19orf40;ATAD2;SLC25A28;TMEM97;C13orf34;E2F8;MCM10;USP1;TRIM59;XRCC3;CDC6;CHTF18;FAM161A;FAM64A;KIF20A;MZT1;NUP62CL;CKS1B;KPNA2;LOC254559;CDC20;STIL;KIF18B;HMMR;UHRF1;SNRNP25;NCAPD2;H…	7;14;19;36;54;58;61;80;88;90;98;101;102;104;106;121;126;129;130;131;159;178;183;215;222;235;237;255;290;294;300;301;315;330;331;345;385;390;413;416;424;442;448;454;463;469;477;492;501;506;512;515;539;600;602;627;629;631;635;640;645;676;680;697;716;729;734;735;739;798;802;841;854;863;865;869;896;903;907;909;931;951;952;961;966;974;998;1009;1021;1060;1068;1080;1092;1093;1115;1142;1147;1165;1171;120…
RNAseq_downregulated_genes	52	wgEncodeSydhTfbsMcf7Hae2f1UcdPk.narrowPeak.gz	HA-E2F1/MCF-7/None	E2F1	hg19-tss-centered-10kb-chip-encode-taipale-inhouse	0.0992344	5.18207	UHRF1;CDK1;SMC4;STIL;MAST2;TUBGCP3;DTL;CENPI;RAD54L;NOLC1;MLF1IP;SMC3;MCM3;MSH5;FAM111B;PBK;PLK4;WDR76;RBBP8;HAUS1;ZWINT;UBE2T;MDC1;TUBB;HNRNPD;DDX12;DNAJC9;CDKN2C;CHAF1A;CEP55;POLA1;TMEM97;USP1;NCAPG;CENPM;CDC7;RFC4;MCM4;PRKDC;RTTN;NUP155;PRC1;TTF2;RRM1;TP73;GLB1L2;ATAD3A;DCLRE1A;ASF1B;PRIM1;CLSPN;CENPF;NT5M;CCHCR1;TCF19;ANP32E;DHRS13;CASP8AP2;DNA2;C10orf78;SLC25A28;DCK;CDC25A;CDC6;HIST1H2BJ;CEN…	UHRF1;CDK1;SMC4;STIL;MAST2;TUBGCP3;DTL;CENPI;RAD54L;NOLC1;MLF1IP;SMC3;MCM3;MSH5;FAM111B;PBK;PLK4;WDR76;RBBP8;HAUS1;ZWINT;UBE2T;MDC1;TUBB;HNRNPD;DDX12;DNAJC9;CDKN2C;CHAF1A;CEP55;POLA1;TMEM97;USP1;NCAPG;CENPM;CDC7;RFC4;MCM4;PRKDC;RTTN;NUP155;PRC1;TTF2;RRM1;TP73;GLB1L2;ATAD3A;DCLRE1A;ASF1B;PRIM1;CLSPN;CENPF;NT5M;CCHCR1;TCF19;ANP32E;DHRS13;CASP8AP2;DNA2;C10orf78;SLC25A28;DCK;CDC25A;CDC6;HIST1H2BJ;CEN…	2;7;9;17;18;19;24;25;26;27;30;31;32;33;35;39;44;46;49;53;54;55;57;58;61;71;73;77;81;84;90;93;96;100;104;112;116;125;129;141;154;162;170;175;179;180;181;185;186;187;193;199;200;216;217;218;224;226;239;243;248;251;260;265;273;275;276;282;293;296;298;302;304;305;310;313;315;319;326;333;336;341;346;348;363;370;373;376;390;393;403;405;408;410;422;423;426;427;432;438;447;448;450;455;457;460;461;463;470…
RNAseq_downregulated_genes	53	taipale-TTTGGCGCCAAA-E2F4-DBD	TTTGGCGCCAAA-E2F4-DBD		hg19-tss-centered-10kb-10species	0.0413477	5.0833	PHF17;MCM6;GINS1;NASP;CDC25A;DMC1;DNMT1;RRM2;CASP8AP2;MCM7;MCM5;DHFR;TIPIN;E2F1;E2F2;EXOSC2;UNG;TOPBP1;MCM2;SMC4;EXPH5;TP73;ZIC5;LMNB2	PHF17;MCM6;GINS1;NASP;CDC25A;DMC1;DNMT1;RRM2;CASP8AP2;MCM7;MCM5;DHFR;TIPIN;E2F1;E2F2;EXOSC2;UNG;TOPBP1;MCM2;SMC4;EXPH5;TP73;ZIC5;LMNB2;ONECUT1;C12orf34;FGFR3;E2F8;ECT2;FBXO5;RELT;PIM1;ORC1;SCML2;OSBPL6;CDCA7;SLC10A3;SMC3;ATAD2;MTFP1;BEND3;CEP57L1;NAV1;NCAPH2;NBL1;C1orf112;GPRIN1;POLE2;GPR19;PITX1;CHEK1;KIF14;AADAT;RBBP8;SAAL1;FKBP5;HAUS6;CENPF;PRTFDC1;CCDC21;RPA2;TMEM201;RFC4;FAM81A;CACYBP;ERCC6L…	1;2;4;5;6;8;9;10;13;15;18;25;28;45;46;52;54;55;59;60;61;66;71;76;96;118;142;166;181;200;209;249;301;351;358;382;405;410;422;504;557;593;628;632;637;665;694;712;728;755;782;816;854;860;919;993;1028;1055;1109;1113;1114;1119;1130;1232;1246;1334;1366;1409;1412;1469;1479;1480;1541;1595;1618;1711;1722;1726;1738;1783;1803;1807;1817;1849;1871;1895;1896;1912;1936;1944;1950;1978;1979;2068;2071;2113;2179;22…
RNAseq_downregulated_genes	54	jaspar-MA0060.1	NFYA	NFYC,NFYB,NFYA,POLE4,POLE3,YBX1	hg19-tss-centered-10kb-10species	0.0413306	5.07981	HIST1H3G;H2AFX;TOMM40;HIST1H2BJ;HIST2H2AC;CDCA2;HMGB1;CENPF;HMGB2;PASK;GAS2L3;TUBB2C;UNG;PRR11;FAM72A;FAM72B;FAM72D;CENPM;CDC45;CDKN3;UBE2C;KIF24;C2orf7;RFWD3;CCNB2;CDCA3;TOP2A;ECT2;SHCBP1;CDC25A;ERG;MDC1;C19orf40;WDR62;SLC25A28;CDC6;TMEM97;E2F8;CBX5;CHTF18;MCM10;FAM161A;TRIM59;C13orf34;KIF20A;ATAD2;LOC254559;XRCC3;NUP62CL;KPNA2;MZT1;USP1;NCAPD3;KIF18B;FAM64A;STIL;H2AFZ;CCDC109B;UHRF1;LIN52;SNRNP…	HIST1H3G;H2AFX;TOMM40;HIST1H2BJ;HIST2H2AC;CDCA2;HMGB1;CENPF;HMGB2;PASK;GAS2L3;TUBB2C;UNG;PRR11;FAM72A;FAM72B;FAM72D;CENPM;CDC45;CDKN3;UBE2C;KIF24;C2orf7;RFWD3;CCNB2;CDCA3;TOP2A;ECT2;SHCBP1;CDC25A;ERG;MDC1;C19orf40;WDR62;SLC25A28;CDC6;TMEM97;E2F8;CBX5;CHTF18;MCM10;FAM161A;TRIM59;C13orf34;KIF20A;ATAD2;LOC254559;XRCC3;NUP62CL;KPNA2;MZT1;USP1;NCAPD3;KIF18B;FAM64A;STIL;H2AFZ;CCDC109B;UHRF1;LIN52;SNRNP…	7;12;18;51;59;61;64;83;84;97;101;102;104;107;109;115;120;121;128;132;148;166;187;207;217;218;238;248;257;266;271;275;296;356;373;377;387;410;411;443;445;446;450;454;486;497;541;545;548;554;558;571;580;586;594;611;622;624;633;639;649;665;689;701;733;735;760;789;803;806;810;828;837;839;845;852;858;898;904;906;954;959;1002;1036;1045;1067;1073;1102;1107;1115;1117;1121;1136;1147;1153;1166;1179;1184;12…
RNAseq_downregulated_genes	55	transfac_pro-M00938	V$E2F1_Q3_01	E2F7,E2F4,E2F3,E2F1,TFDP3,TFDP1	hg19-tss-centered-10kb-10species	0.0411677	5.04645	CDC25A;E2F1;POLA1;MYBL2;MCM6;UNG;HIST1H2BJ;GINS1;CCNE2;TUBA1B;IRX4;CASP8AP2;DHFR;MCM5;DNMT1;RRM2;C1orf135;UHRF1;DLL1;GAS2L3;ATAD2;E2F8;PIM1;PBK;LIN52;CACYBP;CCDC109B;DLEU2;MMP16;CHAF1A;MCM7;HMGB1;CENPF;RFWD3;MCM10;TRIM59;HIST1H3G;ZNF232;TP73;NR2F1;E2F2;COCH;C12orf34;RFC5;KIF15;KIAA1274;DNAJC9;MCM3;RNF219;RANBP1;TNFAIP8L3;NFIX;KLF11;CDT1;NPR3;NASP;ATAD5;GINS2;SHCBP1;LSM6;RAPGEF5;DPYSL5;CDK1;MCM2;K…	CDC25A;E2F1;POLA1;MYBL2;MCM6;UNG;HIST1H2BJ;GINS1;CCNE2;TUBA1B;IRX4;CASP8AP2;DHFR;MCM5;DNMT1;RRM2;C1orf135;UHRF1;DLL1;GAS2L3;ATAD2;E2F8;PIM1;PBK;LIN52;CACYBP;CCDC109B;DLEU2;MMP16;CHAF1A;MCM7;HMGB1;CENPF;RFWD3;MCM10;TRIM59;HIST1H3G;ZNF232;TP73;NR2F1;E2F2;COCH;C12orf34;RFC5;KIF15;KIAA1274;DNAJC9;MCM3;RNF219;RANBP1;TNFAIP8L3;NFIX;KLF11;CDT1;NPR3;NASP;ATAD5;GINS2;SHCBP1;LSM6;RAPGEF5;DPYSL5;CDK1;MCM2;K…	3;4;11;16;36;37;41;49;53;54;72;75;80;83;96;110;115;135;136;149;151;153;158;187;201;223;232;241;262;274;285;287;290;307;324;326;332;335;339;340;376;406;411;450;465;500;584;650;656;691;694;697;700;734;759;766;769;771;797;803;805;813;841;852;863;878;881;890;941;948;959;969;983;991;1003;1005;1006;1012;1032;1058;1098;1100;1111;1153;1176;1197;1207;1228;1244;1268;1281;1313;1347;1376;1387;1451;1470;1485;…
RNAseq_downregulated_genes	56	jaspar-MA0316.1	HAP5	NFYC,NFYB,NFYA,POLE4	hg19-tss-centered-10kb-10species	0.0406486	4.94014	HMGB2;HMGB1;GAS2L3;CDKN3;CDC25A;CDC6;FAM72B;FAM72D;FAM72A;HIST1H3G;CENPM;FAM161A;ATAD2;KIF24;CENPF;TOMM40;FAM64A;NEK2;H2AFX;ECT2;USP1;MCM10;CCNB2;UHRF1;TUBB2C;KPNA2;PASK;ZIC5;CIT;LOC254559;SHCBP1;PRR11;CHTF18;LBR;STIL;C20orf27;E2F8;CCDC109B;ARHGAP33;CDCA2;ASPM;EXOSC2;HIST1H2BJ;TPX2;TTF2;GRK6;HIST2H2AC;C19orf40;KIF18B;C21orf58;ARHGAP11A;DUSP7;CDK1;DLL1;MNX1;KIAA1712;BEND3;MCM5;RFWD3;AURKA;PMM1;TME…	HMGB2;HMGB1;GAS2L3;CDKN3;CDC25A;CDC6;FAM72B;FAM72D;FAM72A;HIST1H3G;CENPM;FAM161A;ATAD2;KIF24;CENPF;TOMM40;FAM64A;NEK2;H2AFX;ECT2;USP1;MCM10;CCNB2;UHRF1;TUBB2C;KPNA2;PASK;ZIC5;CIT;LOC254559;SHCBP1;PRR11;CHTF18;LBR;STIL;C20orf27;E2F8;CCDC109B;ARHGAP33;CDCA2;ASPM;EXOSC2;HIST1H2BJ;TPX2;TTF2;GRK6;HIST2H2AC;C19orf40;KIF18B;C21orf58;ARHGAP11A;DUSP7;CDK1;DLL1;MNX1;KIAA1712;BEND3;MCM5;RFWD3;AURKA;PMM1;TME…	5;31;34;41;48;61;66;68;71;75;77;78;83;95;99;101;158;168;170;175;180;181;190;194;216;236;242;247;257;281;293;296;313;336;363;370;373;378;386;411;441;443;473;487;488;489;513;531;573;580;586;590;591;592;616;634;660;693;701;710;757;763;794;801;825;832;855;860;870;881;892;912;913;954;964;966;980;987;993;999;1008;1011;1016;1032;1064;1083;1088;1113;1134;1152;1189;1226;1233;1238;1247;1321;1347;1383;1422;…
RNAseq_downregulated_genes	57	transfac_pro-M00775	V$NFY_Q6_01	NFYC,NFYB,NFYA,YBX1,POLE3	hg19-tss-centered-10kb-10species	0.0400651	4.82064	HIST1H3G;H2AFX;TOMM40;CDCA2;PRR11;TUBB2C;C2orf7;UBE2C;HIST2H2AC;LIN52;HIST1H2BJ;CDKN3;GAS2L3;TOP2A;PASK;HMGB1;CENPF;CDC45;FAM72A;HMGB2;FAM72B;C13orf34;FAM72D;CCDC109B;MCM10;CDC25A;CENPM;CDC25C;MZT1;WDR62;KIF24;SLC25A28;CCNB2;ECT2;CHTF18;RFWD3;USP1;ZIC5;C19orf40;CDCA3;C20orf27;MDC1;ERG;ANP32E;UHRF1;NCAPD3;FAM161A;SRR;E2F8;ARHGAP19;CBX5;SNRNP25;NR2C2AP;C10orf78;LOC254559;TTF2;DDX39;CDC6;C16orf93;TY…	HIST1H3G;H2AFX;TOMM40;CDCA2;PRR11;TUBB2C;C2orf7;UBE2C;HIST2H2AC;LIN52;HIST1H2BJ;CDKN3;GAS2L3;TOP2A;PASK;HMGB1;CENPF;CDC45;FAM72A;HMGB2;FAM72B;C13orf34;FAM72D;CCDC109B;MCM10;CDC25A;CENPM;CDC25C;MZT1;WDR62;KIF24;SLC25A28;CCNB2;ECT2;CHTF18;RFWD3;USP1;ZIC5;C19orf40;CDCA3;C20orf27;MDC1;ERG;ANP32E;UHRF1;NCAPD3;FAM161A;SRR;E2F8;ARHGAP19;CBX5;SNRNP25;NR2C2AP;C10orf78;LOC254559;TTF2;DDX39;CDC6;C16orf93;TY…	6;19;35;36;53;54;64;71;78;84;87;106;111;114;128;149;162;172;180;181;192;198;202;249;252;260;265;272;276;285;294;306;309;329;342;371;388;396;399;400;437;468;470;481;490;497;501;520;522;525;529;555;561;601;692;699;715;727;730;761;771;794;815;821;827;831;838;848;858;869;878;879;892;906;944;954;964;971;974;980;987;1030;1036;1039;1053;1063;1072;1083;1100;1104;1108;1115;1118;1147;1167;1200;1231;1269;12…
RNAseq_downregulated_genes	58	factorbook-NFY	NFY	NFYC,NFYB,NFYA,POLE4,POLE3,YBX1	hg19-tss-centered-10kb-10species	0.038989	4.60027	H2AFX;TOMM40;HIST1H3G;HMGB1;HIST1H2BJ;HIST2H2AC;UNG;TUBB2C;FAM72A;FAM72B;FAM72D;PASK;CDCA2;CENPF;HMGB2;RFWD3;PRR11;CCNB2;CDCA3;CDC45;WDR62;CHTF18;UBE2C;KIF24;CBX5;CDKN3;GAS2L3;ERG;C2orf7;E2F8;CENPM;C19orf40;CDC6;CDC25A;SLC25A28;ARL6IP6;STIL;TRIM59;ATAD2;FAM161A;C13orf34;TMEM97;ECT2;CKS1B;TOP2A;KIF18B;HMMR;UHRF1;XRCC3;MZT1;CCDC21;MDC1;LHX2;NUSAP1;MCM10;MCM7;LIN52;SHCBP1;ASPM;NCAPD3;FAM64A;ARHGAP33…	H2AFX;TOMM40;HIST1H3G;HMGB1;HIST1H2BJ;HIST2H2AC;UNG;TUBB2C;FAM72A;FAM72B;FAM72D;PASK;CDCA2;CENPF;HMGB2;RFWD3;PRR11;CCNB2;CDCA3;CDC45;WDR62;CHTF18;UBE2C;KIF24;CBX5;CDKN3;GAS2L3;ERG;C2orf7;E2F8;CENPM;C19orf40;CDC6;CDC25A;SLC25A28;ARL6IP6;STIL;TRIM59;ATAD2;FAM161A;C13orf34;TMEM97;ECT2;CKS1B;TOP2A;KIF18B;HMMR;UHRF1;XRCC3;MZT1;CCDC21;MDC1;LHX2;NUSAP1;MCM10;MCM7;LIN52;SHCBP1;ASPM;NCAPD3;FAM64A;ARHGAP33…	5;16;21;30;37;41;48;54;73;75;76;102;104;108;135;141;146;149;161;169;186;196;204;217;219;223;232;236;238;241;289;340;384;389;409;423;440;443;445;447;450;451;459;510;516;545;547;553;556;565;600;633;659;664;676;685;690;700;730;747;751;769;780;785;791;803;806;830;842;862;867;873;890;895;926;938;945;946;965;983;996;1007;1008;1020;1025;1033;1039;1042;1071;1072;1079;1087;1090;1104;1105;1116;1155;1156;11…
RNAseq_downregulated_genes	59	stark-TTTNGGCGS	TTTNGGCGS		hg19-tss-centered-10kb-10species	0.0388299	4.56768	MCM8;HMGN2;PHF17;MCM10;SMC4;ZIC5;PIM1;CHEK1;PKMYT1;FAM161A;NPR3;GJB2;RFWD3;JPH1;DNMT1;GAS2L3;ZNF367;STMN1;TRIM59;DHFR;LMNB2;HMGB1;MXD3;RAD21;SMC2;SIX2;NCAPH2;MYBL2;RANBP1;TNFAIP8L3;NFIX;HSPA12A;IRX4;KIAA1274;E2F2;ATAD2;PASK;RNF26;CCDC109B;CENPF;E2F1;ONECUT1;MNX1;EEPD1;POLA1;OLFM1;HMGB2;BEND3;DLL1;S1PR5;CENPW;RRM2;ARID5A;SRR;KIF23;CBX5;NR2F1;ZNF232;DOK1;OSBPL6;LMF2;C2CD4C;SLC38A3;LHX4;PBK;LHX2;SOX…	MCM8;HMGN2;PHF17;MCM10;SMC4;ZIC5;PIM1;CHEK1;PKMYT1;FAM161A;NPR3;GJB2;RFWD3;JPH1;DNMT1;GAS2L3;ZNF367;STMN1;TRIM59;DHFR;LMNB2;HMGB1;MXD3;RAD21;SMC2;SIX2;NCAPH2;MYBL2;RANBP1;TNFAIP8L3;NFIX;HSPA12A;IRX4;KIAA1274;E2F2;ATAD2;PASK;RNF26;CCDC109B;CENPF;E2F1;ONECUT1;MNX1;EEPD1;POLA1;OLFM1;HMGB2;BEND3;DLL1;S1PR5;CENPW;RRM2;ARID5A;SRR;KIF23;CBX5;NR2F1;ZNF232;DOK1;OSBPL6;LMF2;C2CD4C;SLC38A3;LHX4;PBK;LHX2;SOX…	14;15;22;24;26;47;66;100;101;111;112;117;131;140;158;160;161;173;179;180;208;230;242;248;263;266;268;272;281;292;295;298;302;311;319;351;361;385;390;425;430;443;446;476;498;516;533;545;553;614;632;635;649;694;709;718;724;730;732;734;753;783;821;826;843;911;928;952;963;985;1002;1032;1039;1054;1070;1103;1167;1195;1214;1233;1238;1241;1257;1326;1332;1340;1344;1384;1386;1397;1461;1469;1517;1518;1522;1…
RNAseq_downregulated_genes	60	transfac_pro-M02847	V$E2F4_04	E2F3,E2F2	hg19-tss-centered-10kb-10species	0.0386859	4.53819	PHF17;PIM1;GINS1;RRM2;CASP8AP2;CDC25A;DNMT1;DMC1;MCM6;E2F1;ZNF232;NASP;MND1;UNG;ATAD2;LMNB2;TIPIN;TP73;HNRNPAB;FBXO5;EXPH5;MXD3;KIAA1274;DHFR;TRIM59;CSRP2;GAS2L3;NCAPH2;NR2C2AP;SMC4;KIF15;ONECUT1;DUSP9;MCM5;SLC10A3;MCM10;SHCBP1;KIF14;CENPF;C12orf34;SIP1;SLC16A7;IRX4;E2F8;SMC3	PHF17;PIM1;GINS1;RRM2;CASP8AP2;CDC25A;DNMT1;DMC1;MCM6;E2F1;ZNF232;NASP;MND1;UNG;ATAD2;LMNB2;TIPIN;TP73;HNRNPAB;FBXO5;EXPH5;MXD3;KIAA1274;DHFR;TRIM59;CSRP2;GAS2L3;NCAPH2;NR2C2AP;SMC4;KIF15;ONECUT1;DUSP9;MCM5;SLC10A3;MCM10;SHCBP1;KIF14;CENPF;C12orf34;SIP1;SLC16A7;IRX4;E2F8;SMC3;POLA1;RUNX1T1;CCDC109B;RELT;FAM161A;GJB2;SLC38A3;HAUS3;LOC254559;POLE2;BEND3;MKI67;TYRO3;STARD8;NUP160;HMGB1;BRCA1;MCM7;TM…	1;3;6;7;9;11;12;19;28;35;44;50;70;73;80;111;117;139;155;167;170;178;179;186;210;234;235;253;282;295;319;372;378;380;399;416;421;431;456;465;470;486;504;514;515;544;648;663;697;726;749;792;798;801;808;810;818;845;886;925;927;939;1006;1026;1055;1085;1118;1131;1135;1162;1199;1209;1258;1312;1347;1420;1426;1436;1451;1492;1501;1554;1571;1649;1660;1709;1746;1749;1816;1844;1892;1893;1909;1985;2029;2055;2…
RNAseq_downregulated_genes	61	transfac_pro-M02090	V$E2F4_Q6	E2F4	hg19-tss-centered-10kb-10species	0.0383013	4.45943	FBXO5;TUBA1B;UHRF1;PHF17;HMGN2;ZNF367;TFAP4;HMGB1;NR2F1;CCDC109B;RFWD3;ATAD2;ZNF232;GAS2L3;FAM72B;FAM72D;FAM72A;GJB2;IRX4;KIAA1274;E2F1;FANCC;KIAA0101;GPRIN1;DLL1;LHX4;PASK;ZIC5;FAM161A;MCM3;CDCA7;MYBL2;FOXD2;NOLC1;MMP16;TP73;PIM1;MRE11A;PBK;TUBB;FZD8;MCM5;GABRA1;RBL1;SLC25A28;SIX2;HELLS;DUSP9;JPH1;NPTX1;KNTC1;HIST1H3G;HMGB2;LOC254559;MAD2L2;MNX1;HAUS7;CBX2;SLC38A3;HSPA2;MCM4;NRARP;DLEU2;DEK;TYRO…	FBXO5;TUBA1B;UHRF1;PHF17;HMGN2;ZNF367;TFAP4;HMGB1;NR2F1;CCDC109B;RFWD3;ATAD2;ZNF232;GAS2L3;FAM72B;FAM72D;FAM72A;GJB2;IRX4;KIAA1274;E2F1;FANCC;KIAA0101;GPRIN1;DLL1;LHX4;PASK;ZIC5;FAM161A;MCM3;CDCA7;MYBL2;FOXD2;NOLC1;MMP16;TP73;PIM1;MRE11A;PBK;TUBB;FZD8;MCM5;GABRA1;RBL1;SLC25A28;SIX2;HELLS;DUSP9;JPH1;NPTX1;KNTC1;HIST1H3G;HMGB2;LOC254559;MAD2L2;MNX1;HAUS7;CBX2;SLC38A3;HSPA2;MCM4;NRARP;DLEU2;DEK;TYRO…	8;9;25;31;33;42;46;55;65;71;78;100;104;106;124;125;126;171;174;182;188;194;200;223;232;259;269;280;293;321;335;341;364;392;413;418;426;461;462;468;469;483;493;497;523;533;566;573;580;585;587;606;627;648;653;666;673;698;702;705;725;731;781;799;803;828;836;839;847;887;891;893;915;924;932;933;948;950;998;1000;1018;1020;1082;1096;1142;1164;1208;1259;1307;1310;1311;1402;1436;1447;1459;1494;1505;1530;1…
RNAseq_downregulated_genes	62	transfac_pro-M00430	V$E2F1_Q4	E2F1	hg19-tss-centered-10kb-10species	0.037947	4.38688	DHFR;E2F2;HMGN2;E2F1;RANBP1;ZIC5;UHRF1;CCDC109B;RRM2;RBL1;MCM3;HIST1H3G;CDC6;NR2C2AP;IRX4;KIF15;NR2F1;DTL;MCM5;PIM1;FBXO5;DUSP9;RUNX1T1;CDC45;UNG;TRIM59;ATAD5;KIAA1274;MCM10;E2F8;CDC25A;SLC38A3;RNF219;GAS2L3;MIR17HG;FZD8;SIX2;HMGB1;PHF17;BRI3BP;ZNF232;PHF19;CDK1;KNTC1;EZH2;DPYSL2;MMP16;GJB2;TMPO;FAM161A;LHX2;GNB4;CHAF1A;NPTX1;JPH1;H1FX;HELLS;CDKN2C;MCM7;H2AFZ;BEND3;RAPGEF5;SLBP;CEP57L1;DCLRE1A;PB…	DHFR;E2F2;HMGN2;E2F1;RANBP1;ZIC5;UHRF1;CCDC109B;RRM2;RBL1;MCM3;HIST1H3G;CDC6;NR2C2AP;IRX4;KIF15;NR2F1;DTL;MCM5;PIM1;FBXO5;DUSP9;RUNX1T1;CDC45;UNG;TRIM59;ATAD5;KIAA1274;MCM10;E2F8;CDC25A;SLC38A3;RNF219;GAS2L3;MIR17HG;FZD8;SIX2;HMGB1;PHF17;BRI3BP;ZNF232;PHF19;CDK1;KNTC1;EZH2;DPYSL2;MMP16;GJB2;TMPO;FAM161A;LHX2;GNB4;CHAF1A;NPTX1;JPH1;H1FX;HELLS;CDKN2C;MCM7;H2AFZ;BEND3;RAPGEF5;SLBP;CEP57L1;DCLRE1A;PB…	4;7;15;20;51;56;59;83;98;111;144;171;174;187;193;204;211;226;229;240;244;246;253;256;262;264;269;294;301;305;309;315;345;375;388;391;398;399;417;420;447;458;467;470;485;490;493;516;523;535;555;587;612;617;641;660;672;694;714;762;773;806;825;838;856;901;916;931;938;957;965;972;977;983;1036;1095;1139;1189;1192;1207;1210;1219;1220;1228;1266;1299;1337;1381;1418;1432;1462;1566;1577;1590;1603;1606;1622…
RNAseq_downregulated_genes	63	homer-M01828	SWI4(MacIsaac)/Yeast		hg19-tss-centered-10kb-10species	0.0376932	4.33489	E2F2;RBL1;UNG;MCM6;C12orf34;UHRF1;ONECUT1;DHFR;ATAD5;E2F1;ZWILCH;IRX4;DNMT1;ZNF367;GABRA1;HIST1H2BJ;PRIMA1;CDCA7;MCM2;FAM81A;CDC25B;PHF19;TOPBP1;KIAA1274;DLEU2;ZNF232;DPYSL2;KCTD12;HIST1H3G;MCM3;SHCBP1;WRAP53;CENPF;CDCA8;SIX2;USP1;GEN1;MCM4;SRR;C4orf21;PRKDC;GAS2L3;PPIL5;MCM10;MNX1;RAD21;LHX2;PIM1;ZIC5;CSRP2;LOC644656;NPR3;TRIM59;TUBA1B;GJB2;EPB41L2;PAQR4;ZNF850;RBBP8;FAM161A;ANP32E;CDK1;ATAD2;PI…	E2F2;RBL1;UNG;MCM6;C12orf34;UHRF1;ONECUT1;DHFR;ATAD5;E2F1;ZWILCH;IRX4;DNMT1;ZNF367;GABRA1;HIST1H2BJ;PRIMA1;CDCA7;MCM2;FAM81A;CDC25B;PHF19;TOPBP1;KIAA1274;DLEU2;ZNF232;DPYSL2;KCTD12;HIST1H3G;MCM3;SHCBP1;WRAP53;CENPF;CDCA8;SIX2;USP1;GEN1;MCM4;SRR;C4orf21;PRKDC;GAS2L3;PPIL5;MCM10;MNX1;RAD21;LHX2;PIM1;ZIC5;CSRP2;LOC644656;NPR3;TRIM59;TUBA1B;GJB2;EPB41L2;PAQR4;ZNF850;RBBP8;FAM161A;ANP32E;CDK1;ATAD2;PI…	2;7;9;15;17;24;26;30;57;65;71;81;91;95;100;124;125;134;140;153;165;173;212;215;220;248;280;289;308;311;336;354;378;381;382;448;464;470;492;500;516;540;545;546;561;577;578;605;615;619;626;641;653;701;706;711;725;754;759;777;792;803;811;815;828;838;865;884;889;897;1028;1058;1064;1066;1120;1122;1144;1146;1156;1164;1210;1236;1283;1354;1364;1366;1388;1408;1462;1463;1480;1551;1569;1588;1595;1612;1615;1…
RNAseq_downregulated_genes	64	homer-M00020	CHR/Cell-Cycle-Exp/Homer		hg19-tss-centered-10kb-10species	0.0375492	4.30541	MXD3;CCNF;EPB41L2;HUNK;PLK1;H2AFX;KIAA1274;CDK1;E2F8;PHF17;C12orf34;DBF4;FOXM1;KLHL13;USP1;DNMT3B;GAS2L3;GTSE1;KIF4A;HMGB2;SHCBP1;KIF20B;CCDC109B;DEK;ONECUT1;FAM161A;HEY2;MYBL1;ADD3;MED30;C9orf100;IRX4;NFKBID;FZD8;NRARP;FAM64A;LMNB1;CDCA3;SKA3;CENPF;ATAD2;PRC1;KIF15;LHX4;CEP55;MAD2L1;KCNK5;PBX3;FAM72B;FAM72A;CEP57L1;JPH1;EZH2;C18orf54;RUNX1T1;C12orf48;FBXO5;TRIM59	MXD3;CCNF;EPB41L2;HUNK;PLK1;H2AFX;KIAA1274;CDK1;E2F8;PHF17;C12orf34;DBF4;FOXM1;KLHL13;USP1;DNMT3B;GAS2L3;GTSE1;KIF4A;HMGB2;SHCBP1;KIF20B;CCDC109B;DEK;ONECUT1;FAM161A;HEY2;MYBL1;ADD3;MED30;C9orf100;IRX4;NFKBID;FZD8;NRARP;FAM64A;LMNB1;CDCA3;SKA3;CENPF;ATAD2;PRC1;KIF15;LHX4;CEP55;MAD2L1;KCNK5;PBX3;FAM72B;FAM72A;CEP57L1;JPH1;EZH2;C18orf54;RUNX1T1;C12orf48;FBXO5;TRIM59;TACC3;PKN3;DEPDC1B;CCDC88A;CENPE…	4;14;33;37;42;53;57;64;69;71;92;107;132;136;141;144;170;181;194;202;212;217;225;229;230;240;257;272;296;303;309;310;321;338;400;412;440;464;488;493;513;515;516;522;543;544;552;555;589;592;615;618;628;659;671;685;690;692;732;738;774;812;837;891;893;900;921;993;998;1037;1051;1052;1076;1084;1099;1103;1125;1175;1184;1186;1250;1271;1287;1314;1329;1407;1417;1465;1472;1486;1489;1531;1534;1551;1560;1563;…
RNAseq_downregulated_genes	65	transfac_pro-M02089	V$E2F3_Q6	E2F3	hg19-tss-centered-10kb-10species	0.036996	4.19212	PHF17;RFWD3;E2F8;CASP8AP2;NXPH4;MDC1;DHFR;PLK4;HEY2;LOC100128191;TMPO;GAS2L3;TUBA1B;CCDC109B;FOXD2;HMGN2;PBK;STMN1;PIM1;ATAD2;MSH5;LOC254559;HMGB1;ADD3;CSRP2;RANBP1;MCM3;ZNF367;TRIM59;ZIC5;FAM161A;FZD8;SIX2;HMGB2;KIAA1274;CENPF;NR2F1;ATP1A3;PBX3;PPIL5;CASC5;ZNF695;MCM10;EZH2;DUSP7;HIST1H3G;LIN9;GJB2;ATAD5;BEND3;EEPD1;SRR;MNX1;TUBB;SHCBP1;KIF24;RNF219;HSPA12A;IRX4;CBX5;SLC38A3;FBXO5;NUP107;TUBB2C;…	PHF17;RFWD3;E2F8;CASP8AP2;NXPH4;MDC1;DHFR;PLK4;HEY2;LOC100128191;TMPO;GAS2L3;TUBA1B;CCDC109B;FOXD2;HMGN2;PBK;STMN1;PIM1;ATAD2;MSH5;LOC254559;HMGB1;ADD3;CSRP2;RANBP1;MCM3;ZNF367;TRIM59;ZIC5;FAM161A;FZD8;SIX2;HMGB2;KIAA1274;CENPF;NR2F1;ATP1A3;PBX3;PPIL5;CASC5;ZNF695;MCM10;EZH2;DUSP7;HIST1H3G;LIN9;GJB2;ATAD5;BEND3;EEPD1;SRR;MNX1;TUBB;SHCBP1;KIF24;RNF219;HSPA12A;IRX4;CBX5;SLC38A3;FBXO5;NUP107;TUBB2C;…	15;46;56;67;70;72;92;94;110;111;112;121;131;138;139;154;160;161;169;190;193;199;220;221;229;230;237;245;248;280;317;326;346;350;362;397;402;418;419;450;456;468;519;546;548;557;613;643;656;669;677;712;713;739;740;755;802;814;825;840;868;887;893;911;938;964;967;972;979;983;985;1000;1003;1015;1041;1058;1071;1091;1107;1109;1122;1127;1131;1133;1197;1198;1208;1253;1276;1305;1324;1367;1375;1417;1420;147…
RNAseq_downregulated_genes	66	yetfasco-1536	YBL021C	NFYC,NFYB,NFYA,POLE3	hg19-tss-centered-10kb-10species	0.0368823	4.16884	C2orf7;HIST1H3G;HIST2H2AC;HIST1H2BJ;PRR11;H2AFX;GAS2L3;CENPF;PASK;CDKN3;HMGB2;CDCA2;TOMM40;CENPM;FAM72A;FAM72B;FAM72D;C19orf40;CCNB2;CDC25A;CDC6;CCDC109B;TUBB2C;HMGB1;NEK2;TOP2A;FAM161A;E2F8;CDC45;BEND3;ATAD2;ARHGAP11A;MCM10;SHCBP1;LIN52;TRIM59;UBE2C;KIF24;ERG;SIX2;RFWD3;ASPM;NR2C2AP;NUSAP1;UHRF1;C20orf27;STIL;KIF20A;ARHGAP33;CIT;HYLS1;WDR62;TTF2;MAST1;CBX5;DLL1;ACYP1;SPC25;ARHGAP11B;MTHFD1;CDCA3…	C2orf7;HIST1H3G;HIST2H2AC;HIST1H2BJ;PRR11;H2AFX;GAS2L3;CENPF;PASK;CDKN3;HMGB2;CDCA2;TOMM40;CENPM;FAM72A;FAM72B;FAM72D;C19orf40;CCNB2;CDC25A;CDC6;CCDC109B;TUBB2C;HMGB1;NEK2;TOP2A;FAM161A;E2F8;CDC45;BEND3;ATAD2;ARHGAP11A;MCM10;SHCBP1;LIN52;TRIM59;UBE2C;KIF24;ERG;SIX2;RFWD3;ASPM;NR2C2AP;NUSAP1;UHRF1;C20orf27;STIL;KIF20A;ARHGAP33;CIT;HYLS1;WDR62;TTF2;MAST1;CBX5;DLL1;ACYP1;SPC25;ARHGAP11B;MTHFD1;CDCA3…	7;17;18;48;49;52;68;71;72;74;77;88;102;103;108;124;130;141;163;165;174;180;196;203;212;234;283;315;338;340;378;384;407;415;432;471;491;498;504;512;522;523;530;533;540;542;561;575;576;593;596;642;665;683;703;802;814;841;850;907;926;934;956;964;971;990;1006;1011;1016;1028;1045;1079;1089;1112;1135;1148;1153;1170;1207;1228;1249;1261;1297;1303;1308;1315;1325;1327;1335;1356;1362;1396;1401;1414;1416;142…
RNAseq_downregulated_genes	67	homer-M01858	HAP4(MacIsaac)/Yeast	HOXC8,HOXB8,HOXD8,NFYC,NFYB,NFYA,POLE4	hg19-tss-centered-10kb-10species	0.0366247	4.11607	HIST1H3G;HMGB2;H2AFX;CDKN3;TUBB2C;GAS2L3;C2orf7;CDC25A;CDCA2;HIST1H2BJ;KIF24;ZIC5;HIST2H2AC;ZNF695;GRK6;ARL6IP6;FAM161A;CDC45;USP1;SHCBP1;LHX2;ATAD2;FAM72A;C12orf34;CDC6;UNG;CENPF;LOC254559;CDK1;C21orf58;PASK;FAM72B;ARL6IP1;ECT2;FAM72D;PRR11;RFWD3;XRCC3;EZH2;CIT;DUSP7;CCDC109B;ARHGAP11A;OSBPL6;MDC1;TTF2;C19orf40;DTL;BEND3;MCM10;NUP62CL;FAM64A;KIF20A;ZNF273;ZNF850;CHTF18;UBE2C;HAUS7;SIX2;CBX5;TFAP…	HIST1H3G;HMGB2;H2AFX;CDKN3;TUBB2C;GAS2L3;C2orf7;CDC25A;CDCA2;HIST1H2BJ;KIF24;ZIC5;HIST2H2AC;ZNF695;GRK6;ARL6IP6;FAM161A;CDC45;USP1;SHCBP1;LHX2;ATAD2;FAM72A;C12orf34;CDC6;UNG;CENPF;LOC254559;CDK1;C21orf58;PASK;FAM72B;ARL6IP1;ECT2;FAM72D;PRR11;RFWD3;XRCC3;EZH2;CIT;DUSP7;CCDC109B;ARHGAP11A;OSBPL6;MDC1;TTF2;C19orf40;DTL;BEND3;MCM10;NUP62CL;FAM64A;KIF20A;ZNF273;ZNF850;CHTF18;UBE2C;HAUS7;SIX2;CBX5;TFAP…	13;26;31;70;92;95;98;99;123;148;158;163;176;208;216;218;224;226;231;238;241;243;248;249;269;279;281;314;329;334;340;343;346;350;354;369;370;396;404;413;436;444;445;447;449;453;496;573;574;585;611;671;709;744;759;779;785;789;796;798;832;840;844;847;855;878;896;918;922;931;936;942;1023;1043;1052;1088;1105;1117;1121;1148;1187;1191;1205;1231;1242;1256;1276;1313;1406;1407;1426;1433;1453;1457;1470;1487…
RNAseq_downregulated_genes	68	jaspar-PF0104.1	CCAATNNSNNNGCG	NFYB,NFYA	hg19-tss-centered-10kb-10species	0.036547	4.10016	DTL;ARL6IP6;H2AFX;GAS2L3;NCAPH;CCNB2;KPNA2;FAM81A;SIX2;CLSPN;TMPO;CTSL2;KIF14;H2AFZ;ORC6;NUP93;FAM72B;FAM72D;FAM72A;FBXO5;ATAD2;CHAF1A;PSRC1;ASPM;UNG;CDC25B;PASK;KCNIP3;FZD8;ZIC5;HMGB1;STIL;KIF4A;LHX2;TACC3;TRIM59;FGFRL1;ERG;BRIP1;NUP62CL;STMN1;MCM7;HAUS7;CBX2;TNFAIP8L1;ECT2;DPYSL2;PBX3;ESPL1;MDC1;GRK6;UBE2S;KIF20A;FAM83D;UBE2T;SGOL1;DPYSL5;FAM161A;WHSC1;C12orf34;CDKN2D;CENPM;MZT1;CASP8AP2;MNX1;K…	DTL;ARL6IP6;H2AFX;GAS2L3;NCAPH;CCNB2;KPNA2;FAM81A;SIX2;CLSPN;TMPO;CTSL2;KIF14;H2AFZ;ORC6;NUP93;FAM72B;FAM72D;FAM72A;FBXO5;ATAD2;CHAF1A;PSRC1;ASPM;UNG;CDC25B;PASK;KCNIP3;FZD8;ZIC5;HMGB1;STIL;KIF4A;LHX2;TACC3;TRIM59;FGFRL1;ERG;BRIP1;NUP62CL;STMN1;MCM7;HAUS7;CBX2;TNFAIP8L1;ECT2;DPYSL2;PBX3;ESPL1;MDC1;GRK6;UBE2S;KIF20A;FAM83D;UBE2T;SGOL1;DPYSL5;FAM161A;WHSC1;C12orf34;CDKN2D;CENPM;MZT1;CASP8AP2;MNX1;K…	7;15;42;47;82;91;92;102;111;112;126;128;135;171;180;186;188;189;191;194;219;229;231;233;236;242;246;262;270;278;301;311;323;351;358;374;400;402;434;497;506;510;561;571;572;577;580;582;595;620;643;649;667;671;702;711;717;729;736;760;762;780;782;790;806;812;823;832;857;867;880;912;967;1030;1076;1134;1174;1180;1182;1194;1202;1208;1214;1223;1246;1328;1330;1339;1393;1423;1426;1428;1443;1462;1466;1472;…
RNAseq_downregulated_genes	69	transfac_pro-M02106	V$NFYA_Q5	NFYC,NFYB,NFYA,POLE4,POLE3,YBX1	hg19-tss-centered-10kb-10species	0.0364352	4.07727	H2AFX;HIST1H3G;HIST1H2BJ;UNG;CDCA2;TOMM40;HMGB1;HMGB2;TUBB2C;HIST2H2AC;PRR11;CENPF;FAM72A;PASK;KIF24;FAM72D;FAM72B;GAS2L3;CDKN3;MDC1;RFWD3;CCNB2;E2F8;UBE2C;CDC45;STIL;ECT2;NCAPD2;CDCA3;CDC6;C19orf40;ATAD2;MCM10;WDR62;C2orf7;USP1;CBX5;KIF20A;CHTF18;LHX2;ERG;SLC25A28;TOP2A;DTL;XRCC3;C21orf58;FAM161A;TRIM59;ARHGAP33;NUP62CL;FAM64A;KIF18B;SHCBP1;NCAPD3;CENPM;EZH2;H2AFZ;CDC25A;TMEM97;CCNF;C13orf34;ZIC…	H2AFX;HIST1H3G;HIST1H2BJ;UNG;CDCA2;TOMM40;HMGB1;HMGB2;TUBB2C;HIST2H2AC;PRR11;CENPF;FAM72A;PASK;KIF24;FAM72D;FAM72B;GAS2L3;CDKN3;MDC1;RFWD3;CCNB2;E2F8;UBE2C;CDC45;STIL;ECT2;NCAPD2;CDCA3;CDC6;C19orf40;ATAD2;MCM10;WDR62;C2orf7;USP1;CBX5;KIF20A;CHTF18;LHX2;ERG;SLC25A28;TOP2A;DTL;XRCC3;C21orf58;FAM161A;TRIM59;ARHGAP33;NUP62CL;FAM64A;KIF18B;SHCBP1;NCAPD3;CENPM;EZH2;H2AFZ;CDC25A;TMEM97;CCNF;C13orf34;ZIC…	12;14;42;58;69;75;81;87;88;98;101;102;111;117;120;124;126;152;203;229;232;269;277;278;284;293;305;308;322;323;363;401;404;418;424;438;441;445;446;448;474;490;502;507;513;535;560;573;576;589;612;613;617;662;667;677;728;732;739;748;759;761;764;766;771;787;799;811;848;864;870;873;877;879;887;896;899;903;936;943;948;954;969;985;988;1020;1036;1040;1041;1059;1095;1098;1101;1135;1164;1165;1213;1259;1277…
RNAseq_downregulated_genes	70	transfac_pro-M03805	V$YB1_Q3	NFYB,NFYA,YBX1	hg19-tss-centered-10kb-10species	0.0364238	4.07495	TOMM40;FAM72A;FAM72B;HIST1H3G;FAM72D;UNG;SHCBP1;H2AFX;CDC45;CENPF;HIST1H2BJ;FAM161A;HMGB2;TUBB2C;CCDC109B;ZNF695;CDCA2;HMGB1;CDCA3;GAS2L3;HIST2H2AC;XRCC3;EZH2;CDC25A;GPSM2;KIF24;CCNF;KIAA1274;RUNX1T1;ECT2;GJB2;STIL;PHF17;CDC6;CENPM;CBX5;AADAT;MDC1;FAM64A;ATAD2;UHRF1;HAUS7;KIF18B;ZNF85;PRR11;TOP2A;SLC29A1;LHX2;SRR;C12orf34;KLF11;TRIM59;PBK;TYRO3;NFIX;ACTL8;CDC42EP2;ARHGAP33;ZIC5;BEND3;OSBPL6;LINGO…	TOMM40;FAM72A;FAM72B;HIST1H3G;FAM72D;UNG;SHCBP1;H2AFX;CDC45;CENPF;HIST1H2BJ;FAM161A;HMGB2;TUBB2C;CCDC109B;ZNF695;CDCA2;HMGB1;CDCA3;GAS2L3;HIST2H2AC;XRCC3;EZH2;CDC25A;GPSM2;KIF24;CCNF;KIAA1274;RUNX1T1;ECT2;GJB2;STIL;PHF17;CDC6;CENPM;CBX5;AADAT;MDC1;FAM64A;ATAD2;UHRF1;HAUS7;KIF18B;ZNF85;PRR11;TOP2A;SLC29A1;LHX2;SRR;C12orf34;KLF11;TRIM59;PBK;TYRO3;NFIX;ACTL8;CDC42EP2;ARHGAP33;ZIC5;BEND3;OSBPL6;LINGO…	9;20;23;25;29;44;57;65;67;72;83;94;100;108;110;115;116;119;122;127;143;178;182;184;186;213;232;239;287;297;325;355;364;417;436;454;478;479;484;516;520;589;612;622;648;654;666;669;714;781;836;865;871;893;932;951;1010;1021;1047;1063;1075;1092;1115;1124;1139;1178;1187;1198;1218;1224;1234;1240;1245;1252;1260;1290;1309;1315;1328;1332;1334;1343;1362;1372;1383;1395;1447;1453;1463;1487;1500;1501;1514;152…
RNAseq_downregulated_genes	71	taipale-NNAAATGGCGCCATTTNN-E2F3-DBD	NNAAATGGCGCCATTTNN-E2F3-DBD		hg19-tss-centered-10kb-10species	0.0356869	3.92402	PIM1;SMC4;PITX1;PHF17;MCM7;LOC254559;FBXO5;USP1;RBL1;CDKN2C;NCAPH2;ZIC5;LMNB2;MCM6;NASP;ONECUT1;DHFR;ALG10;CENPQ;HELLS;ANP32E;LIN54;E2F1;PBX3;TCF7L1;DSCC1;LOC100128191;TMPO;MNX1;KIAA1524;ZBTB2;TRIM59;MCM5;AKAP7;DPYSL2;HAUS6	PIM1;SMC4;PITX1;PHF17;MCM7;LOC254559;FBXO5;USP1;RBL1;CDKN2C;NCAPH2;ZIC5;LMNB2;MCM6;NASP;ONECUT1;DHFR;ALG10;CENPQ;HELLS;ANP32E;LIN54;E2F1;PBX3;TCF7L1;DSCC1;LOC100128191;TMPO;MNX1;KIAA1524;ZBTB2;TRIM59;MCM5;AKAP7;DPYSL2;HAUS6;H2AFX;FJX1;CLSPN;GRK6;DLL1;HIST1H3G;SORBS3;LBR;KIF1A;CSRP2;HAUS3;ASRGL1;CP110;TELO2;GMNN;MMP16;FAM161A;FAM72B;FAM72D;FAM72A;CDK1;HAUS7;STARD8;DNMT3B;CTNNAL1;KCNC4;C11orf82;PRI…	3;6;12;13;20;24;29;30;35;41;46;69;72;86;90;91;96;122;169;170;185;193;253;255;267;279;296;300;301;309;336;368;377;384;406;415;447;460;513;562;612;620;635;646;698;720;786;802;838;843;858;884;885;960;970;976;1006;1058;1110;1124;1177;1209;1214;1262;1271;1278;1287;1305;1335;1347;1360;1393;1394;1422;1447;1449;1452;1476;1501;1550;1577;1607;1647;1652;1678;1686;1690;1779;1838;1878;1889;1904;1938;1978;2010…
RNAseq_downregulated_genes	72	wgEncodeSydhTfbsHelas3E2f1StdPk.narrowPeak.gz	E2F1/HeLa-S3/None	E2F1	hg19-tss-centered-10kb-chip-encode-taipale-inhouse	0.0802022	3.92055	SPIN4;EXOSC8;DOK1;MAST2;LOXL3;C1orf112;CDT1;FAM81A;AMIGO2;DCK;RIF1;NAV1;RRM1;NT5M;LMF2;FAM111B;DPYSL2;EZH2;MYBL2;CDCA7L;STIL;TFDP1;RIBC2;WDR76;KIF24;DTL;NCAPH2;UHRF1;LHX2;FANCA;HSPA2;MIR17HG;ZWINT;DEK;LIN54;DHRS13;DBF4;POLA1;SLBP;RFC4;ATAD2;MLF1IP;LMNB2;TUBB;CDCA4;DDX39;CHAF1A;C9orf140;RANBP1;TCF19;PRKDC;TEAD4;MDC1;THOC4;CCNE2;MCM2;MCM4;TIMELESS;TMEM107;C14orf106;TUBGCP3;KDELC2;CCHCR1;SLC36A4;ITG…	SPIN4;EXOSC8;DOK1;MAST2;LOXL3;C1orf112;CDT1;FAM81A;AMIGO2;DCK;RIF1;NAV1;RRM1;NT5M;LMF2;FAM111B;DPYSL2;EZH2;MYBL2;CDCA7L;STIL;TFDP1;RIBC2;WDR76;KIF24;DTL;NCAPH2;UHRF1;LHX2;FANCA;HSPA2;MIR17HG;ZWINT;DEK;LIN54;DHRS13;DBF4;POLA1;SLBP;RFC4;ATAD2;MLF1IP;LMNB2;TUBB;CDCA4;DDX39;CHAF1A;C9orf140;RANBP1;TCF19;PRKDC;TEAD4;MDC1;THOC4;CCNE2;MCM2;MCM4;TIMELESS;TMEM107;C14orf106;TUBGCP3;KDELC2;CCHCR1;SLC36A4;ITG…	4;7;9;12;15;21;27;31;40;42;46;52;54;62;77;79;81;84;86;88;97;98;99;101;102;103;106;109;111;121;122;123;125;144;154;161;163;164;165;170;175;186;189;193;194;196;198;200;202;203;204;208;210;215;221;224;225;227;234;238;244;245;253;265;274;296;304;325;345;377;380;381;384;394;398;416;418;433;444;452;459;461;473;486;492;502;504;505;510;516;523;529;530;537;552;558;559;560;576;582;593;603;615;622;626;643;6…
RNAseq_downregulated_genes	73	transfac_public-M00024	V$E2F_01	E2F1	hg19-tss-centered-10kb-10species	0.0355637	3.8988	E2F1;MCM2;UHRF1;MCM4;PRKDC;FANCC;E2F2;DNMT1;MCM3;DHFR;ZNF232;MCM6;C12orf34;UNG;NASP;LIN52;IRX4;MCM5;GPSM2;NR2F1;PIM1;HIST1H2BJ;EZH2;TOPBP1;CCDC109B;GSTCD;SIX2;LOC642846;WDR76;HSPA12A;PPIL5;GAS2L3;KCTD12;OSBPL6;HMGB1;PHF19;CDCA7;ATAD2;CCDC88A;HIST1H3G;FGFRL1;FZD8;EXO1;HELLS;CDC25B;MCM10;PRTFDC1;SOX18;ODF2;SMC4;PKMYT1;DLEU2;ZIC5;TYRO3;FIGNL1;MKI67;NUP160;GPR19;FAM72B;FAM72A;ZNF367;NPTX1;TRIM59;GABR…	E2F1;MCM2;UHRF1;MCM4;PRKDC;FANCC;E2F2;DNMT1;MCM3;DHFR;ZNF232;MCM6;C12orf34;UNG;NASP;LIN52;IRX4;MCM5;GPSM2;NR2F1;PIM1;HIST1H2BJ;EZH2;TOPBP1;CCDC109B;GSTCD;SIX2;LOC642846;WDR76;HSPA12A;PPIL5;GAS2L3;KCTD12;OSBPL6;HMGB1;PHF19;CDCA7;ATAD2;CCDC88A;HIST1H3G;FGFRL1;FZD8;EXO1;HELLS;CDC25B;MCM10;PRTFDC1;SOX18;ODF2;SMC4;PKMYT1;DLEU2;ZIC5;TYRO3;FIGNL1;MKI67;NUP160;GPR19;FAM72B;FAM72A;ZNF367;NPTX1;TRIM59;GABR…	5;11;14;36;38;47;54;57;58;64;75;77;91;95;107;109;113;118;126;130;147;238;244;267;281;290;303;344;354;361;364;394;416;435;438;459;478;481;510;515;541;552;553;571;612;617;619;636;642;650;661;691;736;746;831;884;917;932;955;965;970;983;1063;1079;1123;1130;1138;1147;1148;1190;1236;1268;1283;1308;1310;1318;1385;1402;1435;1439;1455;1472;1487;1502;1518;1520;1525;1533;1550;1609;1623;1678;1680;1702;1713;1…
RNAseq_downregulated_genes	74	transfac_pro-M01839	P$E2L_Q2		hg19-tss-centered-10kb-10species	0.0355183	3.88949	LOC100128191;TMPO;FBXO5;PHF17;HIST1H3G;EZH2;DHFR;GAS2L3;HMGB2;PIM1;CDC6;SOX18;KIAA1274;HMGB1;UHRF1;CENPF;RADIL;FAM161A;SRR;SLC38A3;FGFRL1;PBK;DMBX1;ATAD2;ADD3;MCM10;FZD8;TRIM59;CCDC109B;TUBB;SHCBP1;CCNE2;PPIL5;ATAD5;RFWD3;TYRO3;METTL4;ZIC5;PBX3;KIF24;CDKN2C;MYBL2;CBX5;FSCN1;BEND3;GJB2;HSPA12A;C16orf75;NR2F1;PFAS;EEPD1;LMNB1;MIR17HG;STMN1;MED30;CASP8AP2;FOXD2;GAL;CTSL2;SIP1;KCNC4;C19orf48;CASC5;MC…	LOC100128191;TMPO;FBXO5;PHF17;HIST1H3G;EZH2;DHFR;GAS2L3;HMGB2;PIM1;CDC6;SOX18;KIAA1274;HMGB1;UHRF1;CENPF;RADIL;FAM161A;SRR;SLC38A3;FGFRL1;PBK;DMBX1;ATAD2;ADD3;MCM10;FZD8;TRIM59;CCDC109B;TUBB;SHCBP1;CCNE2;PPIL5;ATAD5;RFWD3;TYRO3;METTL4;ZIC5;PBX3;KIF24;CDKN2C;MYBL2;CBX5;FSCN1;BEND3;GJB2;HSPA12A;C16orf75;NR2F1;PFAS;EEPD1;LMNB1;MIR17HG;STMN1;MED30;CASP8AP2;FOXD2;GAL;CTSL2;SIP1;KCNC4;C19orf48;CASC5;MC…	7;8;20;34;42;65;69;75;76;79;84;88;89;107;110;117;152;154;179;186;191;193;203;207;289;296;302;313;329;337;344;355;371;393;401;436;439;447;450;530;538;575;593;603;617;623;631;667;668;706;736;757;794;827;867;908;1015;1028;1050;1065;1091;1110;1121;1134;1160;1170;1217;1247;1253;1260;1281;1285;1317;1351;1365;1379;1434;1473;1491;1621;1682;1707;1717;1720;1772;1775;1791;1822;1887;1891;1902;1916;1917;1955;…
RNAseq_downregulated_genes	75	transfac_pro-M02434	F$HAP4_01	HOXC8,HOXB8,HOXD8,NFYC,NFYB,NFYA,POLE4	hg19-tss-centered-10kb-10species	0.0354785	3.88134	HIST1H3G;H2AFX;HMGB2;CDKN3;HIST2H2AC;CDC25A;TUBB2C;HIST1H2BJ;GAS2L3;C2orf7;CDCA2;ZIC5;FAM72A;GRK6;SHCBP1;CDC45;FAM72B;PRR11;FAM72D;USP1;C12orf34;ARL6IP6;FAM161A;ZNF695;UNG;KIF24;C21orf58;ATAD2;LHX2;ECT2;OSBPL6;UBE2C;PASK;CBX5;ARL6IP1;EZH2;CIT;CENPF;XRCC3;CDC6;LOC254559;CDK1;CCDC109B;TTF2;C19orf40;BEND3;RFWD3;ARHGAP11A;MDC1;ZNF273;DUSP7;FAM64A;NUP62CL;E2F8;CHTF18;TOMM40;CCNB2;LGI2;SIX2;HAUS7;TFAP4…	HIST1H3G;H2AFX;HMGB2;CDKN3;HIST2H2AC;CDC25A;TUBB2C;HIST1H2BJ;GAS2L3;C2orf7;CDCA2;ZIC5;FAM72A;GRK6;SHCBP1;CDC45;FAM72B;PRR11;FAM72D;USP1;C12orf34;ARL6IP6;FAM161A;ZNF695;UNG;KIF24;C21orf58;ATAD2;LHX2;ECT2;OSBPL6;UBE2C;PASK;CBX5;ARL6IP1;EZH2;CIT;CENPF;XRCC3;CDC6;LOC254559;CDK1;CCDC109B;TTF2;C19orf40;BEND3;RFWD3;ARHGAP11A;MDC1;ZNF273;DUSP7;FAM64A;NUP62CL;E2F8;CHTF18;TOMM40;CCNB2;LGI2;SIX2;HAUS7;TFAP4…	8;26;27;78;80;92;96;99;109;115;132;141;164;172;177;179;186;189;198;211;233;252;267;271;280;289;290;292;323;333;351;374;383;395;404;409;423;424;427;431;459;466;501;526;545;573;585;586;587;639;646;672;708;739;742;750;753;768;836;844;874;887;895;901;903;906;910;936;984;991;1002;1005;1006;1024;1047;1070;1081;1114;1136;1189;1195;1234;1255;1257;1268;1285;1317;1323;1335;1340;1352;1363;1379;1383;1440;145…
RNAseq_downregulated_genes	76	transfac_pro-M01503	F$UME6_01	E2F2	hg19-tss-centered-10kb-10species	0.0354349	3.87242	C12orf34;UNG;E2F1;CDC25A;C14orf145;KIF4A;ONECUT1;PHTF2;HMGN2;E2F8;KIAA1274;MND1;DLL1;PRIMA1;LOC254559;UHRF1;PHF17;RAD51AP1;CASP8AP2;ATAD2;MCM10;KIF15;UNC5C;SHCBP1;KAL1;CCDC109B;KIF14;GJB2;GABRA1;FAM161A;UNC5A;IRX4;RRM2;LMNB2;HIST1H3G;SMC4;METTL4;HSPA2;BEND3;ZIC5;SPSB4;TUBB2C;PBK;HNRNPD;PBX3;PITX1;TUBB;KIF4B;DNAJC9;C16orf59;DNMT1;RAD1;DHFR;RAD21;SOX18;DIRAS1;H1FX;MNX1;SIX2;SIP1;CENPF;CCNE2;JAG2;HS…	C12orf34;UNG;E2F1;CDC25A;C14orf145;KIF4A;ONECUT1;PHTF2;HMGN2;E2F8;KIAA1274;MND1;DLL1;PRIMA1;LOC254559;UHRF1;PHF17;RAD51AP1;CASP8AP2;ATAD2;MCM10;KIF15;UNC5C;SHCBP1;KAL1;CCDC109B;KIF14;GJB2;GABRA1;FAM161A;UNC5A;IRX4;RRM2;LMNB2;HIST1H3G;SMC4;METTL4;HSPA2;BEND3;ZIC5;SPSB4;TUBB2C;PBK;HNRNPD;PBX3;PITX1;TUBB;KIF4B;DNAJC9;C16orf59;DNMT1;RAD1;DHFR;RAD21;SOX18;DIRAS1;H1FX;MNX1;SIX2;SIP1;CENPF;CCNE2;JAG2;HS…	3;6;25;43;53;58;69;80;88;93;95;98;120;155;156;159;181;202;213;214;217;225;231;277;287;307;314;323;325;330;331;337;357;375;392;404;406;427;457;530;534;545;556;557;558;559;592;598;664;682;697;739;758;765;773;798;838;867;871;877;891;892;920;975;1005;1020;1033;1037;1039;1051;1059;1083;1091;1099;1122;1126;1141;1167;1175;1176;1238;1242;1259;1273;1283;1302;1320;1339;1348;1407;1409;1416;1475;1483;1491;14…
RNAseq_downregulated_genes	77	yetfasco-828	YDR207C	E2F2	hg19-tss-centered-10kb-10species	0.0354349	3.87242	C12orf34;UNG;E2F1;CDC25A;C14orf145;KIF4A;ONECUT1;PHTF2;HMGN2;E2F8;KIAA1274;MND1;DLL1;PRIMA1;LOC254559;UHRF1;PHF17;RAD51AP1;CASP8AP2;ATAD2;MCM10;KIF15;UNC5C;SHCBP1;KAL1;CCDC109B;KIF14;GJB2;GABRA1;FAM161A;UNC5A;IRX4;RRM2;LMNB2;HIST1H3G;SMC4;METTL4;HSPA2;BEND3;ZIC5;SPSB4;TUBB2C;PBK;HNRNPD;PBX3;PITX1;TUBB;KIF4B;DNAJC9;C16orf59;DNMT1;RAD1;DHFR;RAD21;SOX18;DIRAS1;H1FX;MNX1;SIX2;SIP1;CENPF;CCNE2;JAG2;HS…	C12orf34;UNG;E2F1;CDC25A;C14orf145;KIF4A;ONECUT1;PHTF2;HMGN2;E2F8;KIAA1274;MND1;DLL1;PRIMA1;LOC254559;UHRF1;PHF17;RAD51AP1;CASP8AP2;ATAD2;MCM10;KIF15;UNC5C;SHCBP1;KAL1;CCDC109B;KIF14;GJB2;GABRA1;FAM161A;UNC5A;IRX4;RRM2;LMNB2;HIST1H3G;SMC4;METTL4;HSPA2;BEND3;ZIC5;SPSB4;TUBB2C;PBK;HNRNPD;PBX3;PITX1;TUBB;KIF4B;DNAJC9;C16orf59;DNMT1;RAD1;DHFR;RAD21;SOX18;DIRAS1;H1FX;MNX1;SIX2;SIP1;CENPF;CCNE2;JAG2;HS…	3;6;25;43;53;58;69;80;88;93;95;98;120;155;156;159;181;202;213;214;217;225;231;277;287;307;314;323;325;330;331;337;357;375;392;404;406;427;457;530;534;545;556;557;558;559;592;598;664;682;697;739;758;765;773;798;838;867;871;877;891;892;920;975;1005;1020;1033;1037;1039;1051;1059;1083;1091;1099;1122;1126;1141;1167;1175;1176;1238;1242;1259;1273;1283;1302;1320;1339;1348;1407;1409;1416;1475;1483;1491;14…
RNAseq_downregulated_genes	78	jaspar-PF0112.1	KTGGYRSGAA		hg19-tss-centered-10kb-10species	0.0352758	3.83983	MCM3;MCM6;EZH2;DCLRE1A;SH3BP1;CHAF1A;PIM1;PRIM1;RANBP1;WDR76;ATAD2;TIMELESS;MIR17HG;GINS2;SHCBP1;MCM7;CENPF;NRARP;TOPBP1;CCDC109B;UHRF1;DNMT3B;PSMC3IP;CHEK1;TMEM191A;SRR;GAS2L3;KIAA1274;MCM4;PRKDC;DHFR;KCTD12;C16orf75;FAM161A;CSRP2;TCF19;FGFR3;SMC4;ADCY3;IRX4;KIFC1;GPRIN1;PITX1;GABRB2;PRPS2;CDCA7;HAUS7;E2F2;UNC5A;RUNX1T1;ORC1;MCM10;CCDC18;CNTNAP2;RFC4;MNX1;AKAP7;CDT1;TYRO3;RAD21;RNF144A;SPC25;GK;…	MCM3;MCM6;EZH2;DCLRE1A;SH3BP1;CHAF1A;PIM1;PRIM1;RANBP1;WDR76;ATAD2;TIMELESS;MIR17HG;GINS2;SHCBP1;MCM7;CENPF;NRARP;TOPBP1;CCDC109B;UHRF1;DNMT3B;PSMC3IP;CHEK1;TMEM191A;SRR;GAS2L3;KIAA1274;MCM4;PRKDC;DHFR;KCTD12;C16orf75;FAM161A;CSRP2;TCF19;FGFR3;SMC4;ADCY3;IRX4;KIFC1;GPRIN1;PITX1;GABRB2;PRPS2;CDCA7;HAUS7;E2F2;UNC5A;RUNX1T1;ORC1;MCM10;CCDC18;CNTNAP2;RFC4;MNX1;AKAP7;CDT1;TYRO3;RAD21;RNF144A;SPC25;GK;…	3;4;15;17;20;22;36;48;50;58;67;96;98;121;125;144;153;156;157;179;180;190;211;217;219;231;236;249;262;283;286;289;334;355;383;509;514;548;587;604;610;656;668;693;702;719;729;746;750;787;838;859;870;874;899;902;905;914;920;922;964;977;1003;1008;1054;1066;1070;1076;1122;1173;1212;1237;1272;1276;1316;1334;1360;1364;1369;1370;1390;1433;1483;1528;1531;1534;1586;1595;1628;1642;1786;1797;1798;1824;1835;1…
RNAseq_downregulated_genes	79	taipale-WTTCGAAYG-HSFY2-DBD	WTTCGAAYG-HSFY2-DBD		hg19-tss-centered-10kb-10species	0.0351943	3.82315	ZNF367;PBX3;TRIM59;STMN1;DUSP7;GAS2L3;SGOL1;KIAA1274;MNX1;MCM10;MZT1;KIF24;CCNF;LIN9;CDC25B;DLEU2;NUP107;HNRNPAB;CENPF;CCDC109B;PKMYT1;H2AFZ;SSRP1;RAD21;HEY2;SIP1;DLL1	ZNF367;PBX3;TRIM59;STMN1;DUSP7;GAS2L3;SGOL1;KIAA1274;MNX1;MCM10;MZT1;KIF24;CCNF;LIN9;CDC25B;DLEU2;NUP107;HNRNPAB;CENPF;CCDC109B;PKMYT1;H2AFZ;SSRP1;RAD21;HEY2;SIP1;DLL1;ATAD2;TYRO3;LOC254559;FZD8;MED30;CDCA5;SHCBP1;DUSP9;SRR;ONECUT1;GRK6;MELK;CASC5;LHX4;PSRC1;PHF17;KIF14;HMGB1;RELT;RAD54L;KIF22;AADAT;C4orf21;METTL4;ZNF232;HSPA12A;CACHD1;NDC80;OSBPL6;KLHL13;TTPA;PPARA;EPB41L2;RRM1;KIAA1712;FAM81A;K…	2;13;15;17;19;26;33;35;36;37;46;53;79;80;87;91;129;141;146;150;168;177;224;227;229;251;259;338;350;372;377;412;427;459;487;492;500;519;523;533;542;561;626;632;659;664;736;737;742;753;805;811;822;836;863;893;938;964;965;969;970;1026;1040;1045;1108;1119;1154;1212;1304;1335;1340;1342;1355;1365;1394;1437;1465;1476;1622;1624;1705;1747;1797;1808;1822;1841;1854;1858;1872;1887;1899;1930;1956;1959;2003;20…
RNAseq_downregulated_genes	80	transfac_pro-M02846	V$E2F2_04	E2F3,E2F2	hg19-tss-centered-10kb-10species	0.0350863	3.80103	CASP8AP2;PHF17;RRM2;CDC25A;GINS1;PIM1;DNMT1;ZNF232;E2F1;MND1;DMC1;ATAD2;NASP;UNG;DHFR;LMNB2;KIAA1274;MCM6;HNRNPAB;CSRP2;TIPIN;TP73;MCM5;EXPH5;KIF15;NR2C2AP;TRIM59;DUSP9;GJB2;CENPF;E2F8;FBXO5;DLL1;GAS2L3;NUP160;LOC254559;SHCBP1;C12orf34;FAM161A;TYRO3;IRX4;SMC4;SIP1;BEND3;NCAPH2;ONECUT1;MTFP1;CCDC109B;SLC10A3;MCM10;METTL4;SLC38A3;CACYBP;RELT;SMC3;MXD3;NFIX;HMGB1;KIF14;E2F2;TMEM194A;MKI67;RUNX1T1;BR…	CASP8AP2;PHF17;RRM2;CDC25A;GINS1;PIM1;DNMT1;ZNF232;E2F1;MND1;DMC1;ATAD2;NASP;UNG;DHFR;LMNB2;KIAA1274;MCM6;HNRNPAB;CSRP2;TIPIN;TP73;MCM5;EXPH5;KIF15;NR2C2AP;TRIM59;DUSP9;GJB2;CENPF;E2F8;FBXO5;DLL1;GAS2L3;NUP160;LOC254559;SHCBP1;C12orf34;FAM161A;TYRO3;IRX4;SMC4;SIP1;BEND3;NCAPH2;ONECUT1;MTFP1;CCDC109B;SLC10A3;MCM10;METTL4;SLC38A3;CACYBP;RELT;SMC3;MXD3;NFIX;HMGB1;KIF14;E2F2;TMEM194A;MKI67;RUNX1T1;BR…	2;3;4;5;7;12;14;38;42;46;49;91;103;113;123;127;159;168;177;179;184;192;195;207;215;232;319;320;322;390;404;418;437;439;477;487;497;502;512;520;526;562;574;582;655;672;683;739;743;788;812;863;879;896;916;918;942;949;962;971;987;1015;1046;1068;1073;1110;1117;1120;1146;1168;1170;1308;1309;1330;1356;1380;1451;1463;1485;1530;1563;1618;1641;1692;1781;1791;1797;1798;1812;1833;1843;1856;1925;1938;1958;19…
RNAseq_downregulated_genes	81	swissregulon-TFDP1.p2	TFDP1	TFDP3,E2F4,E2F3,E2F1,TFDP1	hg19-tss-centered-10kb-10species	0.0350636	3.79638	PIM1;NXPH4;RFWD3;HMGN2;MDC1;TUBA1B;PHF17;ZIC5;H2AFX;TCF19;SIX2;LHX2;ANP32E;RAPGEF5;HSPA12A;NR2F1;MCM3;FZD8;PPIL5;HMGB1;TUBB;CCDC109B;BEND3;HIST1H3G;TRIM59;CENPF;HEY2;EEPD1;KIAA1274;TUBB2C;HNRNPD;KCNC4;SHCBP1;DHFR;ATAD2;LHX4;PASK;MNX1;UHRF1;IRX4;OLFM1;MCM10;SAP30;SRR;GAS2L3;FMNL3;METTL4;GABRA1;SUN2;PBK;ZNF695;HNRNPAB;SPSB4;LOC254559;ZNF850;HSPA2;FGFR3;TFDP1;TMEM201;ZNF232;USP1;MYBL2;LIN9;ADD3;OSBP…	PIM1;NXPH4;RFWD3;HMGN2;MDC1;TUBA1B;PHF17;ZIC5;H2AFX;TCF19;SIX2;LHX2;ANP32E;RAPGEF5;HSPA12A;NR2F1;MCM3;FZD8;PPIL5;HMGB1;TUBB;CCDC109B;BEND3;HIST1H3G;TRIM59;CENPF;HEY2;EEPD1;KIAA1274;TUBB2C;HNRNPD;KCNC4;SHCBP1;DHFR;ATAD2;LHX4;PASK;MNX1;UHRF1;IRX4;OLFM1;MCM10;SAP30;SRR;GAS2L3;FMNL3;METTL4;GABRA1;SUN2;PBK;ZNF695;HNRNPAB;SPSB4;LOC254559;ZNF850;HSPA2;FGFR3;TFDP1;TMEM201;ZNF232;USP1;MYBL2;LIN9;ADD3;OSBP…	11;24;36;40;85;95;109;113;115;123;133;134;137;145;150;164;166;201;216;238;241;246;252;262;294;317;332;345;358;393;400;401;404;422;426;432;435;448;451;465;467;477;488;490;511;533;551;573;601;621;632;652;658;660;669;725;739;742;758;765;777;781;784;802;880;892;893;897;917;923;972;983;990;1011;1016;1027;1030;1031;1032;1035;1047;1077;1078;1084;1115;1130;1141;1194;1200;1217;1221;1233;1261;1282;1300;130…
RNAseq_downregulated_genes	82	taipale-AATGGCGCCAAA-E2F4-DBD	AATGGCGCCAAA-E2F4-DBD		hg19-tss-centered-10kb-10species	0.0349802	3.77931	PIM1;PHF17;NASP;NCAPH2;SMC4;GINS1;FBXO5;ZIC5;RELT;DNMT1;DMC1;CLSPN;CDC25A;MCM7;STMN1	PIM1;PHF17;NASP;NCAPH2;SMC4;GINS1;FBXO5;ZIC5;RELT;DNMT1;DMC1;CLSPN;CDC25A;MCM7;STMN1;RRM2;TIPIN;CACYBP;EXOSC2;POLA1;CASP8AP2;SLC10A3;MCM6;TP73;EXPH5;MED30;LMNB2;ONECUT1;PPIL5;ZNF367;CDCA7;AADAT;LOC642846;FKBP5;SPSB4;TRIM59;BEND3;GNAZ;TCOF1;NCAPD2;MCM8;SUV39H1;MCM5;MAST1;PRKDC;ADCY3;HSD17B6;OSBPL6;DHFR;E2F2;GSTCD;GINS4;DTL;NUP93;FAM72A;CEP57L1;WNT10B;FAM72B;SLC39A8;PRIM1;HJURP;KIF14;CENPF;MMS22L;D…	2;3;11;13;19;21;24;26;38;39;43;44;48;54;56;98;143;146;148;165;175;182;193;206;291;297;298;314;322;350;361;392;416;432;457;498;510;517;542;586;595;601;671;706;723;750;752;760;784;819;865;873;896;903;906;917;928;933;987;1013;1024;1041;1046;1050;1095;1130;1139;1241;1280;1289;1313;1359;1386;1406;1486;1562;1602;1691;1707;1708;1749;1762;1801;1818;1824;1843;1854;1972;2017;2033;2069;2112;2116;2125;2166;2…
RNAseq_downregulated_genes	83	jaspar-PF0005.1	GATTGGY	NFYA	hg19-tss-centered-10kb-10species	0.034751	3.73236	ZIC5;H2AFX;CDCA2;HIST1H3G;PRR11;FAM64A;NCAPD2;HMGB2;LIN52;ORC6;ECT2;ASF1B;E2F8;GAS2L3;USP1;CDC25C;RUNX1T1;NUP62CL;CDK1;MCM10;STIL;CENPF;CLSPN;C10orf78;MCM7;UBE2C;XRCC3;DIAPH3;KIF20A;MZT1;C13orf34;KIFC1;C2orf7;C16orf93;KIF24;CCDC109B;SORBS3;CDKN3;SPC25;TOP2A;BRIP1;ZNF850;CBX5;CIT;MDC1;DTL;LBR;C21orf58;MNX1;C12orf34;TK1;INCENP;ODF2;HEY2;YBX2;SLC29A1;ADD3;GMNN;UBE2T;AURKA;SLC25A28;GABRA1;PASK;KIAA12…	ZIC5;H2AFX;CDCA2;HIST1H3G;PRR11;FAM64A;NCAPD2;HMGB2;LIN52;ORC6;ECT2;ASF1B;E2F8;GAS2L3;USP1;CDC25C;RUNX1T1;NUP62CL;CDK1;MCM10;STIL;CENPF;CLSPN;C10orf78;MCM7;UBE2C;XRCC3;DIAPH3;KIF20A;MZT1;C13orf34;KIFC1;C2orf7;C16orf93;KIF24;CCDC109B;SORBS3;CDKN3;SPC25;TOP2A;BRIP1;ZNF850;CBX5;CIT;MDC1;DTL;LBR;C21orf58;MNX1;C12orf34;TK1;INCENP;ODF2;HEY2;YBX2;SLC29A1;ADD3;GMNN;UBE2T;AURKA;SLC25A28;GABRA1;PASK;KIAA12…	5;19;24;29;48;55;58;66;68;76;82;89;105;129;130;157;195;196;210;219;229;230;234;251;258;269;275;300;340;358;367;400;409;421;428;442;469;475;478;490;504;534;553;578;624;637;652;661;664;667;681;720;738;766;771;776;778;820;821;832;838;864;878;890;904;932;939;956;960;962;1042;1045;1056;1073;1148;1155;1161;1164;1227;1228;1247;1264;1265;1311;1391;1392;1433;1444;1465;1482;1484;1515;1547;1574;1592;1617;16…
RNAseq_downregulated_genes	84	homer-M01803	YER051W(MacIsaac)/Yeast		hg19-tss-centered-10kb-10species	0.0347358	3.72926	GAS2L3;STMN1;KIAA1274;CDC25B;PBX3;KIF24;TRIM59;MZT1;CDCA2;ZNF367;SGOL1;CENPF;CCNF;SLC25A28;LIN9;WNT3A;LIN54;GRK6;CCDC109B;PHF17;PSRC1;PASK;NRM;NR2C2AP;DLEU2;SPSB4;FGFRL1;SHCBP1;ZNF232;SLC39A8;MCM10;ATAD2;NDC80;CACHD1;C17orf53;C9orf40;TRIP13;C4orf21;SSRP1;KIFC1;KAL1;MDC1;TMEM191A;MNX1;KIF22;LOC254559;SIX2;PBK;FAM161A;HSPA12A;IMPA2;H2AFZ;NRGN;MAST2;NUP160;DLL1;TYRO3;NRARP;PRC1;GEN1;LHX4;SCML2;TUBA1…	GAS2L3;STMN1;KIAA1274;CDC25B;PBX3;KIF24;TRIM59;MZT1;CDCA2;ZNF367;SGOL1;CENPF;CCNF;SLC25A28;LIN9;WNT3A;LIN54;GRK6;CCDC109B;PHF17;PSRC1;PASK;NRM;NR2C2AP;DLEU2;SPSB4;FGFRL1;SHCBP1;ZNF232;SLC39A8;MCM10;ATAD2;NDC80;CACHD1;C17orf53;C9orf40;TRIP13;C4orf21;SSRP1;KIFC1;KAL1;MDC1;TMEM191A;MNX1;KIF22;LOC254559;SIX2;PBK;FAM161A;HSPA12A;IMPA2;H2AFZ;NRGN;MAST2;NUP160;DLL1;TYRO3;NRARP;PRC1;GEN1;LHX4;SCML2;TUBA1…	3;4;14;21;24;26;33;36;52;74;75;81;100;111;114;121;134;148;161;162;187;219;232;242;245;309;317;336;340;353;382;404;423;439;458;473;476;487;500;539;556;580;601;637;638;643;645;679;705;737;788;795;835;839;869;874;876;925;951;970;978;1004;1008;1048;1121;1145;1161;1200;1221;1227;1284;1332;1335;1338;1344;1347;1356;1402;1436;1459;1462;1492;1496;1501;1505;1549;1559;1566;1579;1599;1603;1622;1686;1698;1715…
RNAseq_downregulated_genes	85	homer-M00124	NFY(CCAAT)/Promoter/Homer	NFYC,NFYB,NFYA,POLE3	hg19-tss-centered-10kb-10species	0.0347074	3.72344	HIST1H3G;HMGB1;TOMM40;H2AFX;HIST2H2AC;TUBB2C;CENPF;PASK;UNG;UBE2C;C2orf7;HIST1H2BJ;CDCA3;CDC45;CCNB2;CBX5;KIF24;CDKN3;CDCA2;CHTF18;HMGB2;WDR62;PRR11;MDC1;FAM64A;UHRF1;CKS1B;GAS2L3;MCM10;RFWD3;TMEM97;ATAD2;ARHGAP33;ECT2;SLC25A28;E2F8;CDC20;DTL;ASPM;C19orf40;ERG;TOP2A;FAM72B;ZIC5;FAM72D;FAM72A;C13orf34;NR2C2AP;KIF18B;CDC6;CENPM;LIN52;CDC25C;PRTFDC1;NCAPD2;MZT1;C20orf27;CCDC109B;USP1;ZNF367;KLF11;ZN…	HIST1H3G;HMGB1;TOMM40;H2AFX;HIST2H2AC;TUBB2C;CENPF;PASK;UNG;UBE2C;C2orf7;HIST1H2BJ;CDCA3;CDC45;CCNB2;CBX5;KIF24;CDKN3;CDCA2;CHTF18;HMGB2;WDR62;PRR11;MDC1;FAM64A;UHRF1;CKS1B;GAS2L3;MCM10;RFWD3;TMEM97;ATAD2;ARHGAP33;ECT2;SLC25A28;E2F8;CDC20;DTL;ASPM;C19orf40;ERG;TOP2A;FAM72B;ZIC5;FAM72D;FAM72A;C13orf34;NR2C2AP;KIF18B;CDC6;CENPM;LIN52;CDC25C;PRTFDC1;NCAPD2;MZT1;C20orf27;CCDC109B;USP1;ZNF367;KLF11;ZN…	6;8;10;20;34;39;57;70;91;134;139;148;159;164;166;174;180;187;222;240;243;244;253;281;285;295;297;312;338;351;386;405;410;438;440;444;449;455;465;467;498;524;555;562;565;570;584;585;619;636;653;663;679;683;694;695;708;718;746;755;767;780;784;789;790;799;801;820;838;867;878;879;902;921;943;947;970;978;980;984;985;990;998;1038;1057;1063;1088;1112;1128;1133;1137;1143;1144;1153;1163;1171;1178;1193;122…
RNAseq_downregulated_genes	86	jaspar-MA0314.1	HAP3	NFYC,NFYB,NFYA,POLE3	hg19-tss-centered-10kb-10species	0.0346771	3.71723	HIST2H2AC;C2orf7;HIST1H3G;PRR11;PASK;CDKN3;HMGB2;CDCA2;HIST1H2BJ;TOMM40;CENPM;CCNB2;GAS2L3;HMGB1;C19orf40;CENPF;NEK2;FAM72B;FAM72A;FAM72D;CDC6;CDC25A;FAM161A;TOP2A;H2AFX;BEND3;CCDC109B;ARHGAP11A;TUBB2C;SIX2;NR2C2AP;ASPM;ARHGAP33;CIT;HYLS1;MCM10;NUSAP1;C20orf27;KIF20A;LIN52;TTF2;UBE2C;RFWD3;MAST1;ATAD2;UHRF1;CDC45;WDR62;DLL1;SHCBP1;E2F8;ARHGAP11B;ACYP1;MTHFD1;CBX5;ERG;OSBPL6;AURKA;KIF24;SPC25;C21o…	HIST2H2AC;C2orf7;HIST1H3G;PRR11;PASK;CDKN3;HMGB2;CDCA2;HIST1H2BJ;TOMM40;CENPM;CCNB2;GAS2L3;HMGB1;C19orf40;CENPF;NEK2;FAM72B;FAM72A;FAM72D;CDC6;CDC25A;FAM161A;TOP2A;H2AFX;BEND3;CCDC109B;ARHGAP11A;TUBB2C;SIX2;NR2C2AP;ASPM;ARHGAP33;CIT;HYLS1;MCM10;NUSAP1;C20orf27;KIF20A;LIN52;TTF2;UBE2C;RFWD3;MAST1;ATAD2;UHRF1;CDC45;WDR62;DLL1;SHCBP1;E2F8;ARHGAP11B;ACYP1;MTHFD1;CBX5;ERG;OSBPL6;AURKA;KIF24;SPC25;C21o…	10;16;21;49;54;58;59;73;94;97;100;126;137;143;147;159;161;169;172;173;175;204;209;211;218;274;315;321;364;405;414;444;452;459;463;465;466;483;490;505;514;538;562;565;582;590;596;614;625;655;670;676;683;693;703;733;762;780;792;816;837;880;887;899;906;914;919;926;938;961;966;1003;1013;1021;1044;1051;1067;1068;1085;1088;1101;1109;1128;1153;1154;1163;1181;1204;1235;1247;1287;1290;1302;1342;1363;1367;…
RNAseq_downregulated_genes	87	wgEncodeHaibTfbsHepg2Mybl2sc81192V0422111PkRep1.broadPeak.gz	MYBL2_(SC-81192)/HepG2/None	MYBL2	hg19-tss-centered-10kb-chip-encode-taipale-inhouse	0.0770573	3.7121	MDC1;PRR11;HMGB2;ARL6IP1;TUBB;AURKA;HIST2H2AC;TMEM107;MSH5;H2AFX;EZH2;SGOL2;CKS2;PLK1;G2E3;TOP2A;FAM83D;HMMR;CDCA2;TUBA1B;TPX2;BUB1;CENPA;CDKN2D;LMNB2;PRC1;CCNB1;LMNB1;NUSAP1;OIP5;STIL;FBXO5;TUBA1C;KIFC1;CASC5;CENPF;DTYMK;ARHGAP11B;HJURP;CENPL;RACGAP1;BIRC5;CDK5RAP2;CKAP2L;SNORD17;UBE2C;KPNA2;NCAPG;SMPD4;NCAPD2;BUB1B;ANLN;ECT2;HIST1H2BJ;SMC4;KIF20A;ARL6IP6;C14orf106;USP1;INCENP;CENPN;CKS1B;LOC816…	MDC1;PRR11;HMGB2;ARL6IP1;TUBB;AURKA;HIST2H2AC;TMEM107;MSH5;H2AFX;EZH2;SGOL2;CKS2;PLK1;G2E3;TOP2A;FAM83D;HMMR;CDCA2;TUBA1B;TPX2;BUB1;CENPA;CDKN2D;LMNB2;PRC1;CCNB1;LMNB1;NUSAP1;OIP5;STIL;FBXO5;TUBA1C;KIFC1;CASC5;CENPF;DTYMK;ARHGAP11B;HJURP;CENPL;RACGAP1;BIRC5;CDK5RAP2;CKAP2L;SNORD17;UBE2C;KPNA2;NCAPG;SMPD4;NCAPD2;BUB1B;ANLN;ECT2;HIST1H2BJ;SMC4;KIF20A;ARL6IP6;C14orf106;USP1;INCENP;CENPN;CKS1B;LOC816…	16;26;27;43;45;58;59;63;76;79;81;82;83;90;93;101;107;113;128;140;144;148;149;150;151;157;163;166;167;168;174;176;181;182;184;185;195;198;206;210;217;226;228;229;237;244;249;250;252;258;260;269;272;273;278;298;302;314;316;320;321;325;331;336;343;344;347;358;378;383;385;386;389;390;393;396;400;405;411;417;418;419;425;427;443;448;450;451;459;461;464;467;470;486;496;502;504;508;517;521;546;549;587;59…
RNAseq_downregulated_genes	88	transfac_public-M00254	V$CAAT_01	NFYC,NFYB,NFYA,YBX1,POLE3	hg19-tss-centered-10kb-10species	0.0345843	3.69822	HIST1H3G;TUBB2C;H2AFX;PRR11;CDCA2;TOMM40;HIST2H2AC;CDKN3;LIN52;WDR62;C2orf7;GAS2L3;TOP2A;UBE2C;HIST1H2BJ;PASK;NR2C2AP;MDC1;CENPF;NR2F1;HMGB1;SRR;C13orf34;CACYBP;CBX5;FAM72B;FAM72A;FAM72D;ZNF695;HMGB2;CDC6;RFWD3;CCNB2;CDC45;CDCA3;C19orf40;ARHGAP19;MZT1;MCM3;KIF24;MCM10;FAM161A;ANP32E;LOC254559;ARHGAP33;UHRF1;MMP16;CCDC109B;CDC25C;CDKN2D;GINS4;CENPI;CCDC99;SNRNP25;C20orf27;FZD8;OSBPL6;VRK1;ZNF850;T…	HIST1H3G;TUBB2C;H2AFX;PRR11;CDCA2;TOMM40;HIST2H2AC;CDKN3;LIN52;WDR62;C2orf7;GAS2L3;TOP2A;UBE2C;HIST1H2BJ;PASK;NR2C2AP;MDC1;CENPF;NR2F1;HMGB1;SRR;C13orf34;CACYBP;CBX5;FAM72B;FAM72A;FAM72D;ZNF695;HMGB2;CDC6;RFWD3;CCNB2;CDC45;CDCA3;C19orf40;ARHGAP19;MZT1;MCM3;KIF24;MCM10;FAM161A;ANP32E;LOC254559;ARHGAP33;UHRF1;MMP16;CCDC109B;CDC25C;CDKN2D;GINS4;CENPI;CCDC99;SNRNP25;C20orf27;FZD8;OSBPL6;VRK1;ZNF850;T…	12;16;39;58;63;81;83;104;113;133;135;160;167;171;191;200;209;212;224;281;291;306;308;309;310;311;318;326;330;331;340;341;347;359;361;380;395;398;425;428;463;474;537;555;561;600;616;626;639;642;647;660;669;671;681;698;707;734;754;792;808;907;921;931;942;956;982;1014;1021;1028;1033;1053;1054;1072;1076;1108;1115;1117;1132;1151;1156;1201;1213;1243;1255;1259;1263;1269;1357;1370;1387;1451;1455;1464;148…
RNAseq_downregulated_genes	89	homer-M00031	E2F6(E2F)/Hela-E2F6-ChIP-Seq(GSE31477)/Homer	E2F7,E2F6,E2F4	hg19-tss-centered-10kb-10species	0.0344725	3.67533	TUBA1B;PHF17;NR2F1;MCM3;MAD2L2;HMGB1;FANCC;DUSP9;ATAD2;IRX4;HMGN2;FBXO5;NOLC1;RANBP1;CCNE2;HMGB2;LHX4;ZIC5;LHX2;LOC100128191;TMPO;ZNF367;LOC254559;NRM;RFWD3;FAM161A;GPRIN1;FAM72D;FAM72A;CD3EAP;FAM72B;E2F8;GABRA1;UHRF1;GAS2L3;RIF1;OSBPL6;THOC4;USP37;NUP62CL;ZNF85;FOXD2;CCDC109B;RMI1;LMNB1;MCM4;NCAPG;RAD21;HAUS7;ITPKA;DCLRE1A;KIAA1274;CNTNAP2;ZNF850;TYRO3;KLF11;MSH5;CDC7;ZNF232;GABRB2;CSRP2;PRKDC;T…	TUBA1B;PHF17;NR2F1;MCM3;MAD2L2;HMGB1;FANCC;DUSP9;ATAD2;IRX4;HMGN2;FBXO5;NOLC1;RANBP1;CCNE2;HMGB2;LHX4;ZIC5;LHX2;LOC100128191;TMPO;ZNF367;LOC254559;NRM;RFWD3;FAM161A;GPRIN1;FAM72D;FAM72A;CD3EAP;FAM72B;E2F8;GABRA1;UHRF1;GAS2L3;RIF1;OSBPL6;THOC4;USP37;NUP62CL;ZNF85;FOXD2;CCDC109B;RMI1;LMNB1;MCM4;NCAPG;RAD21;HAUS7;ITPKA;DCLRE1A;KIAA1274;CNTNAP2;ZNF850;TYRO3;KLF11;MSH5;CDC7;ZNF232;GABRB2;CSRP2;PRKDC;T…	12;57;58;99;102;112;113;114;155;159;165;172;180;193;221;231;238;248;260;272;275;292;299;305;306;322;332;342;349;350;361;369;379;385;406;411;413;420;422;439;466;472;495;505;517;528;546;578;583;596;599;608;615;622;636;642;649;669;670;697;754;758;787;794;805;820;830;840;855;877;888;909;922;939;962;980;985;989;1033;1041;1057;1088;1148;1152;1154;1156;1201;1225;1268;1282;1316;1340;1396;1403;1404;1423;1…
RNAseq_downregulated_genes	90	taipale-TTTCCCGCCAAA-E2F8-DBD	TTTCCCGCCAAA-E2F8-DBD		hg19-tss-centered-10kb-10species	0.0344232	3.66524	CHEK1;MCM4;PRKDC;MCM5;CCDC109B;MCM6;UHRF1;KNTC1;RANBP1;CHAF1A;OSBPL6;HAUS7;RRM2;LIN52;ANKRD32;LSM6;MCM10;TYRO3;RUNX1T1;CBX2;PPIL5;TNFAIP8L3;SLBP;UNG;STMN1;GNB4;TRIM59;KIAA1274;CSRP2;ATAD2;WDR76;E2F1;CENPE;RACGAP1;GJB2;ZIC5;MZT1;HSPA12A;CDC45;TCF19;SHCBP1;FAM72A;FAM72B;HELLS;C16orf75;EPB41L2;DHFR;FBXO5;MCM7;LOC254559;FAM161A;SLC25A28;MTHFD1;MCM2;C12orf34;C4orf21;GAS2L3;PRIM1;ZBTB2;EZH2	CHEK1;MCM4;PRKDC;MCM5;CCDC109B;MCM6;UHRF1;KNTC1;RANBP1;CHAF1A;OSBPL6;HAUS7;RRM2;LIN52;ANKRD32;LSM6;MCM10;TYRO3;RUNX1T1;CBX2;PPIL5;TNFAIP8L3;SLBP;UNG;STMN1;GNB4;TRIM59;KIAA1274;CSRP2;ATAD2;WDR76;E2F1;CENPE;RACGAP1;GJB2;ZIC5;MZT1;HSPA12A;CDC45;TCF19;SHCBP1;FAM72A;FAM72B;HELLS;C16orf75;EPB41L2;DHFR;FBXO5;MCM7;LOC254559;FAM161A;SLC25A28;MTHFD1;MCM2;C12orf34;C4orf21;GAS2L3;PRIM1;ZBTB2;EZH2;LGI2;CEP57L…	1;2;3;6;12;13;16;26;35;36;53;68;85;127;131;150;160;164;239;243;254;263;281;282;294;310;317;335;356;367;368;388;416;421;444;458;503;517;519;531;552;563;571;590;618;636;644;647;655;660;680;731;739;743;747;757;760;778;779;786;827;831;881;900;970;1012;1099;1133;1134;1146;1148;1191;1247;1275;1312;1334;1355;1362;1367;1400;1423;1424;1428;1449;1455;1481;1488;1538;1552;1614;1744;1753;1871;1874;1888;1902;1…
RNAseq_downregulated_genes	91	transfac_public-M00185	V$NFY_Q6	NFYC,NFYB,NFYA,POLE3	hg19-tss-centered-10kb-10species	0.0341902	3.61752	HIST1H3G;H2AFX;TUBB2C;TOMM40;HIST1H2BJ;HMGB1;GAS2L3;TOP2A;PRR11;CENPF;CDKN3;LIN52;CBX5;CCDC109B;UBE2C;CDC25C;WDR62;KIF24;HMGB2;HIST2H2AC;MCM10;CDC45;C19orf40;C2orf7;RFWD3;FAM72B;ERG;FAM72A;SNRNP25;ZNF367;UNG;CDCA2;FAM72D;PASK;CCNB2;FAM161A;MDC1;CDCA3;OSBPL6;CACYBP;SLC25A28;NCAPD3;C13orf34;CDC6;NR2F1;PRTFDC1;CHTF18;LOC254559;KIAA0101;C20orf27;KIAA1274;KIF18B;MZT1;MED30;ECT2;SHCBP1;CENPM;SIX2;E2F8;…	HIST1H3G;H2AFX;TUBB2C;TOMM40;HIST1H2BJ;HMGB1;GAS2L3;TOP2A;PRR11;CENPF;CDKN3;LIN52;CBX5;CCDC109B;UBE2C;CDC25C;WDR62;KIF24;HMGB2;HIST2H2AC;MCM10;CDC45;C19orf40;C2orf7;RFWD3;FAM72B;ERG;FAM72A;SNRNP25;ZNF367;UNG;CDCA2;FAM72D;PASK;CCNB2;FAM161A;MDC1;CDCA3;OSBPL6;CACYBP;SLC25A28;NCAPD3;C13orf34;CDC6;NR2F1;PRTFDC1;CHTF18;LOC254559;KIAA0101;C20orf27;KIAA1274;KIF18B;MZT1;MED30;ECT2;SHCBP1;CENPM;SIX2;E2F8;…	4;16;17;34;39;64;73;76;77;86;98;108;136;139;142;165;167;179;180;189;203;222;232;266;267;305;308;319;325;356;361;405;419;430;435;436;458;469;475;479;494;581;596;619;654;688;696;704;725;730;745;751;757;759;771;784;787;800;828;847;857;921;922;951;965;973;976;994;999;1011;1031;1038;1054;1077;1080;1083;1151;1152;1158;1179;1187;1195;1203;1205;1217;1246;1326;1329;1338;1343;1378;1382;1390;1422;1520;1563;…
RNAseq_downregulated_genes	92	homer-M01862	HAP2(MacIsaac)/Yeast	NFYC,NFYB,NFYA,POLE4,POLE3	hg19-tss-centered-10kb-10species	0.0341789	3.61519	HIST1H3G;TUBB2C;HIST2H2AC;HIST1H2BJ;H2AFX;FAM72A;CDCA3;FAM72B;KIF24;FAM72D;TOMM40;EZH2;CDKN3;CBX5;MCM10;OSBPL6;CDC25A;PASK;GRK6;SHCBP1;HMGB2;C21orf58;C2orf7;CCNB2;UNG;HMGB1;SRR;CDCA2;USP1;ZNF695;CDC45;CENPF;ECT2;ASPM;UBE2C;GAS2L3;MDC1;CCDC109B;ATAD2;FAM161A;TOP2A;ARHGAP33;TRIM59;SNRNP25;ZIC5;CCDC99;LHX2;CHTF18;C12orf34;CDC6;ARL6IP1;MMP16;RANBP1;PBK;WDR62;GJB2;SLC25A28;ARL6IP6;GABRA1;GPR19;ZNF850;…	HIST1H3G;TUBB2C;HIST2H2AC;HIST1H2BJ;H2AFX;FAM72A;CDCA3;FAM72B;KIF24;FAM72D;TOMM40;EZH2;CDKN3;CBX5;MCM10;OSBPL6;CDC25A;PASK;GRK6;SHCBP1;HMGB2;C21orf58;C2orf7;CCNB2;UNG;HMGB1;SRR;CDCA2;USP1;ZNF695;CDC45;CENPF;ECT2;ASPM;UBE2C;GAS2L3;MDC1;CCDC109B;ATAD2;FAM161A;TOP2A;ARHGAP33;TRIM59;SNRNP25;ZIC5;CCDC99;LHX2;CHTF18;C12orf34;CDC6;ARL6IP1;MMP16;RANBP1;PBK;WDR62;GJB2;SLC25A28;ARL6IP6;GABRA1;GPR19;ZNF850;…	2;32;40;47;63;80;85;86;90;95;110;117;141;173;180;182;220;226;227;232;243;248;268;274;284;286;291;308;323;331;340;359;377;395;408;414;418;419;500;508;534;556;564;574;578;614;623;654;692;753;759;770;784;790;799;801;814;815;867;884;894;921;925;931;939;970;1003;1004;1009;1021;1024;1036;1042;1043;1112;1129;1153;1224;1314;1340;1360;1369;1410;1419;1575;1579;1583;1629;1658;1665;1737;1749;1753;1773;1814;1…
RNAseq_downregulated_genes	93	yetfasco-647	YGL237C	NFYA	hg19-tss-centered-10kb-10species	0.0334476	3.46543	HIST1H3G;TUBB2C;HIST2H2AC;HIST1H2BJ;TOMM40;GRK6;EZH2;FAM72A;FAM72B;CDCA3;FAM72D;ZIC5;KIF24;H2AFX;FAM161A;CBX5;OSBPL6;CDKN3;CDC25A;ECT2;SHCBP1;MCM10;HMGB1;SRR;MDC1;RANBP1;SLC25A28;C2orf7;CDC45;C21orf58;GAS2L3;DUSP7;CCDC109B;MNX1;TOP2A;USP1;UBE2C;CCDC99;ARHGAP33;PASK;ZNF273;C12orf34;HMGB2;MED30;CACYBP;ASPM;PIM1;TRIM59;CENPF;CDCA2;SNRNP25	HIST1H3G;TUBB2C;HIST2H2AC;HIST1H2BJ;TOMM40;GRK6;EZH2;FAM72A;FAM72B;CDCA3;FAM72D;ZIC5;KIF24;H2AFX;FAM161A;CBX5;OSBPL6;CDKN3;CDC25A;ECT2;SHCBP1;MCM10;HMGB1;SRR;MDC1;RANBP1;SLC25A28;C2orf7;CDC45;C21orf58;GAS2L3;DUSP7;CCDC109B;MNX1;TOP2A;USP1;UBE2C;CCDC99;ARHGAP33;PASK;ZNF273;C12orf34;HMGB2;MED30;CACYBP;ASPM;PIM1;TRIM59;CENPF;CDCA2;SNRNP25;PBX3;LHX2;ZNF695;ATAD2;RAI14;CCNB2;ZNF850;KIAA1274;MMP16;CHTF…	1;4;18;70;77;82;85;100;102;106;107;124;153;158;169;187;207;233;242;254;257;272;304;313;316;332;346;360;365;366;373;413;424;431;450;470;476;480;513;524;526;528;549;574;575;580;582;589;590;593;597;647;661;673;755;795;804;825;863;868;878;881;884;926;958;992;1008;1061;1068;1100;1111;1128;1160;1180;1190;1220;1271;1321;1347;1381;1451;1487;1498;1506;1581;1586;1630;1650;1652;1700;1702;1706;1719;1732;1747…
RNAseq_downregulated_genes	94	jaspar-MA0401.1	SWI4		hg19-tss-centered-10kb-10species	0.0331198	3.39831	MCM6;IRX4;PHF19;RBL1;DHFR;CCNF;TOPBP1;DPYSL2;MCM2;UHRF1;FAM81A;GABRA1;GAS2L3;CSRP2;PAQR4;NPR3;SIX2;ATAD5;HIST1H2BJ;ZWILCH;DNMT3B;SAP30;UNG;SIP1;LOC644656;USP1;NR2F1;ONECUT1;GJB2;C9orf40;ZNF232;DLEU2;KIAA1274;DLL1;MCM10;ZNF367;C4orf21;DNMT1;MCM7;ZIC5;CDCA7;E2F2;KCTD12;PHF17;MNX1;CENPF;GEN1;ANP32E;RAD21;HSPA12A;PPIL5;DUSP9;RBBP8;FAM161A;KIF1A;CDCA8;C12orf34;PITX1;LHX2;MCM3;TYRO3;CCNE2;HYLS1;CACYBP;…	MCM6;IRX4;PHF19;RBL1;DHFR;CCNF;TOPBP1;DPYSL2;MCM2;UHRF1;FAM81A;GABRA1;GAS2L3;CSRP2;PAQR4;NPR3;SIX2;ATAD5;HIST1H2BJ;ZWILCH;DNMT3B;SAP30;UNG;SIP1;LOC644656;USP1;NR2F1;ONECUT1;GJB2;C9orf40;ZNF232;DLEU2;KIAA1274;DLL1;MCM10;ZNF367;C4orf21;DNMT1;MCM7;ZIC5;CDCA7;E2F2;KCTD12;PHF17;MNX1;CENPF;GEN1;ANP32E;RAD21;HSPA12A;PPIL5;DUSP9;RBBP8;FAM161A;KIF1A;CDCA8;C12orf34;PITX1;LHX2;MCM3;TYRO3;CCNE2;HYLS1;CACYBP;…	19;54;62;65;68;74;112;118;141;151;160;167;191;192;202;219;222;226;230;238;283;297;313;339;340;346;352;353;387;390;397;398;420;425;433;452;454;462;468;482;504;506;521;524;525;553;584;593;596;604;610;624;628;644;652;668;702;735;770;777;796;798;826;836;840;870;904;950;951;955;1000;1015;1019;1075;1095;1160;1174;1187;1209;1221;1247;1253;1273;1295;1304;1334;1373;1393;1539;1583;1612;1628;1681;1730;1749;…
RNAseq_downregulated_genes	95	yetfasco-584	YER111C		hg19-tss-centered-10kb-10species	0.0331198	3.39831	MCM6;IRX4;PHF19;RBL1;DHFR;CCNF;TOPBP1;DPYSL2;MCM2;UHRF1;FAM81A;GABRA1;GAS2L3;CSRP2;PAQR4;NPR3;SIX2;ATAD5;HIST1H2BJ;ZWILCH;DNMT3B;SAP30;UNG;SIP1;LOC644656;USP1;NR2F1;ONECUT1;GJB2;C9orf40;ZNF232;DLEU2;KIAA1274;DLL1;MCM10;ZNF367;C4orf21;DNMT1;MCM7;ZIC5;CDCA7;E2F2;KCTD12;PHF17;MNX1;CENPF;GEN1;ANP32E;RAD21;HSPA12A;PPIL5;DUSP9;RBBP8;FAM161A;KIF1A;CDCA8;C12orf34;PITX1;LHX2;MCM3;TYRO3;CCNE2;HYLS1;CACYBP;…	MCM6;IRX4;PHF19;RBL1;DHFR;CCNF;TOPBP1;DPYSL2;MCM2;UHRF1;FAM81A;GABRA1;GAS2L3;CSRP2;PAQR4;NPR3;SIX2;ATAD5;HIST1H2BJ;ZWILCH;DNMT3B;SAP30;UNG;SIP1;LOC644656;USP1;NR2F1;ONECUT1;GJB2;C9orf40;ZNF232;DLEU2;KIAA1274;DLL1;MCM10;ZNF367;C4orf21;DNMT1;MCM7;ZIC5;CDCA7;E2F2;KCTD12;PHF17;MNX1;CENPF;GEN1;ANP32E;RAD21;HSPA12A;PPIL5;DUSP9;RBBP8;FAM161A;KIF1A;CDCA8;C12orf34;PITX1;LHX2;MCM3;TYRO3;CCNE2;HYLS1;CACYBP;…	19;54;62;65;68;74;112;118;141;151;160;167;191;192;202;219;222;226;230;238;283;297;313;339;340;346;352;353;387;390;397;398;420;425;433;452;454;462;468;482;504;506;521;524;525;553;584;593;596;604;610;624;628;644;652;668;702;735;770;777;796;798;826;836;840;870;904;950;951;955;1000;1015;1019;1075;1095;1160;1174;1187;1209;1221;1247;1253;1273;1295;1304;1334;1373;1393;1539;1583;1612;1628;1681;1730;1749;…
RNAseq_downregulated_genes	96	homer-M01546	SWI4/SWI4_YPD/29-SWI4,29-SWI6(Harbison)/Yeast		hg19-tss-centered-10kb-10species	0.0322957	3.22954	E2F2;MCM6;IRX4;DHFR;UNG;ATAD5;E2F1;TOPBP1;CDC25A;HIST1H2BJ;C12orf34;GAS2L3;MCM10;ONECUT1;HMGN2;PHF19;CDCA8;MCM7;LOC644656;USP1;CSRP2;CDCA7;GABRA1;ZNF232;DPYSL2;ZNF367;ANP32E;NXPH4;DLEU2;PHF17;FAM161A;SAP30;OSBPL6;KIF15;C4orf21;DLL1;MCM3;GJB2;PPIL5;GEN1;LHX4;TRIM59;FBXO5;MNX1;CCNF;HEY2;PIM1;CCDC109B;PITX1;HIST1H3G;H1FX;SRR;CDKN2C;CDC25B;KCTD12;HNRNPD;FAM81A;NPR3;KIF26A;LHX2;EPB41L2;ZWILCH;MCM5;HSP…	E2F2;MCM6;IRX4;DHFR;UNG;ATAD5;E2F1;TOPBP1;CDC25A;HIST1H2BJ;C12orf34;GAS2L3;MCM10;ONECUT1;HMGN2;PHF19;CDCA8;MCM7;LOC644656;USP1;CSRP2;CDCA7;GABRA1;ZNF232;DPYSL2;ZNF367;ANP32E;NXPH4;DLEU2;PHF17;FAM161A;SAP30;OSBPL6;KIF15;C4orf21;DLL1;MCM3;GJB2;PPIL5;GEN1;LHX4;TRIM59;FBXO5;MNX1;CCNF;HEY2;PIM1;CCDC109B;PITX1;HIST1H3G;H1FX;SRR;CDKN2C;CDC25B;KCTD12;HNRNPD;FAM81A;NPR3;KIF26A;LHX2;EPB41L2;ZWILCH;MCM5;HSP…	1;19;24;36;51;52;54;68;76;77;80;88;91;95;124;187;195;200;222;239;286;316;320;329;341;367;380;389;392;401;415;453;458;461;472;481;493;494;519;525;535;539;559;603;618;648;712;723;741;757;787;808;814;828;854;906;922;935;940;944;982;1057;1074;1093;1115;1125;1128;1142;1172;1175;1182;1195;1206;1224;1271;1301;1315;1327;1379;1404;1440;1470;1503;1517;1532;1554;1566;1597;1608;1630;1647;1657;1668;1676;1680;…
RNAseq_downregulated_genes	97	yetfasco-853	YDR303C		hg19-tss-centered-10kb-10species	0.0322408	3.21829	HNRNPAB;LOC254559;UHRF1;ESCO2;DLL1;LHX2;H2AFX;CACYBP;FKBP5;CCNA2;PRIMA1;CBX5;PHF17;IRX4;GABRB2;HIST1H3G;TUBA1B;C19orf48;DCLRE1B;BEND3;ONECUT1;CDKN2C;MNX1;NCAPH;ASPM;NPTX1;RBL1;OSBPL6;PFAS;TRIM59;MMP16;CENPF;PBK;HMGB1;ATAD5;NPR3;NR2F1;DDX39;DLEU2;FANCI;ZBTB2;DUSP9;UNC5A;NFIX;HNRNPD;CNTNAP2;USP1;LHX4;DUSP7;TUBB2C;DHFR;CCDC109B;RAD21;NCAPD3;FAM161A;PIM1;ITPKA;CCNF;LRRC3;RRM2;PASK;DPYSL2;ANP32E;TUBB;…	HNRNPAB;LOC254559;UHRF1;ESCO2;DLL1;LHX2;H2AFX;CACYBP;FKBP5;CCNA2;PRIMA1;CBX5;PHF17;IRX4;GABRB2;HIST1H3G;TUBA1B;C19orf48;DCLRE1B;BEND3;ONECUT1;CDKN2C;MNX1;NCAPH;ASPM;NPTX1;RBL1;OSBPL6;PFAS;TRIM59;MMP16;CENPF;PBK;HMGB1;ATAD5;NPR3;NR2F1;DDX39;DLEU2;FANCI;ZBTB2;DUSP9;UNC5A;NFIX;HNRNPD;CNTNAP2;USP1;LHX4;DUSP7;TUBB2C;DHFR;CCDC109B;RAD21;NCAPD3;FAM161A;PIM1;ITPKA;CCNF;LRRC3;RRM2;PASK;DPYSL2;ANP32E;TUBB;…	6;15;39;73;76;86;87;98;100;110;122;135;138;149;205;225;231;250;268;271;283;285;294;299;338;344;358;367;371;375;402;406;408;442;457;484;490;492;502;504;517;520;571;582;591;604;609;622;642;643;666;670;685;697;726;767;770;775;791;793;845;850;852;870;878;907;937;946;949;985;991;993;1020;1024;1030;1032;1041;1044;1181;1195;1208;1245;1269;1279;1293;1316;1337;1353;1361;1366;1402;1408;1433;1462;1463;1479;…
RNAseq_downregulated_genes	98	yetfasco-1906	YDR207C		hg19-tss-centered-10kb-10species	0.0322256	3.21518	IRX4;E2F1;ONECUT1;HNRNPD;CDC25A;C12orf34;UNG;TUBB2C;LINGO1;RANBP1;UNC5C;KIAA1274;CCDC109B;PBK;FAM161A;E2F2;LHX2;CENPF;SPSB4;HIST1H3G;METTL4;SHCBP1;FGFR3;GRIK3;DHFR;NCAPG;ZNF232;HEY2;RFWD3;SRR;PKMYT1;PHTF2;RPP25;MCM3;KCNH2;GAS2L3;DLL1;KIF4A;ATAD5;GJB2;SLC38A3;C14orf145;LIN52;GABRB2;HYLS1;WDR76;MNS1;PIM1;JAG2;DUSP9;WNT10B;RRM2;TMEM48;PASK;BIRC5;ZIC5;ATAD2;RAD21;MCM5;E2F8;SLC25A28;TYRO3;EZH2;BEND3;T…	IRX4;E2F1;ONECUT1;HNRNPD;CDC25A;C12orf34;UNG;TUBB2C;LINGO1;RANBP1;UNC5C;KIAA1274;CCDC109B;PBK;FAM161A;E2F2;LHX2;CENPF;SPSB4;HIST1H3G;METTL4;SHCBP1;FGFR3;GRIK3;DHFR;NCAPG;ZNF232;HEY2;RFWD3;SRR;PKMYT1;PHTF2;RPP25;MCM3;KCNH2;GAS2L3;DLL1;KIF4A;ATAD5;GJB2;SLC38A3;C14orf145;LIN52;GABRB2;HYLS1;WDR76;MNS1;PIM1;JAG2;DUSP9;WNT10B;RRM2;TMEM48;PASK;BIRC5;ZIC5;ATAD2;RAD21;MCM5;E2F8;SLC25A28;TYRO3;EZH2;BEND3;T…	9;11;15;16;22;25;31;43;55;63;72;92;110;169;170;176;179;193;230;241;252;309;333;340;380;382;390;400;428;437;450;452;471;473;479;485;489;507;512;522;526;539;541;554;606;633;668;670;671;675;692;730;731;739;750;767;773;815;834;902;910;961;966;974;1041;1050;1070;1095;1120;1127;1128;1143;1152;1158;1176;1185;1220;1330;1342;1365;1369;1463;1501;1518;1536;1545;1569;1598;1622;1630;1650;1656;1660;1678;1685;1…
RNAseq_downregulated_genes	99	yetfasco-1947	YER111C		hg19-tss-centered-10kb-10species	0.0321498	3.19966	HMGN2;E2F2;ZNF367;DHFR;E2F1;IRX4;MCM6;ZNF232;UNG;RUNX1T1;DLEU2;KIAA1274;PPIL5;USP1;ATAD5;TRIM59;GAS2L3;MCM7;CDC25B;GJB2;PIM1;TOPBP1;CNTNAP2;C12orf34;DUSP9;MCM3;HEY2;CDCA7;PHF19;RELT;ODF2;JPH1;HSPA12A;CCDC109B;KCTD12;MNX1;ONECUT1;GABRA1;TYRO3	HMGN2;E2F2;ZNF367;DHFR;E2F1;IRX4;MCM6;ZNF232;UNG;RUNX1T1;DLEU2;KIAA1274;PPIL5;USP1;ATAD5;TRIM59;GAS2L3;MCM7;CDC25B;GJB2;PIM1;TOPBP1;CNTNAP2;C12orf34;DUSP9;MCM3;HEY2;CDCA7;PHF19;RELT;ODF2;JPH1;HSPA12A;CCDC109B;KCTD12;MNX1;ONECUT1;GABRA1;TYRO3;LHX2;SRR;RAB3IL1;MAD2L2;SOX18;ANP32E;CDC25A;FAM161A;TMEM191A;PITX1;RFWD3;DPYSL2;ATAD2;RACGAP1;KIAA0101;KCNIP3;CDK1;SIP1;RBL1;CDKL1;SHCBP1;FZD8;FKBP5;PHF17;SI…	1;8;16;23;27;28;48;71;77;96;100;105;112;128;131;150;166;168;174;191;246;278;290;302;339;370;374;385;391;418;442;446;449;467;471;479;484;494;503;537;567;618;675;679;687;732;740;743;746;825;832;845;856;863;885;942;974;1001;1039;1209;1219;1274;1277;1285;1312;1364;1379;1383;1432;1445;1540;1544;1545;1552;1554;1602;1620;1661;1689;1693;1694;1700;1706;1741;1769;1786;1790;1812;1876;1881;1899;1952;1962;196…
RNAseq_downregulated_genes	100	yetfasco-379	YKL109W	NFYC,NFYB,NFYA	hg19-tss-centered-10kb-10species	0.0321404	3.19772	TUBB2C;HIST1H3G;GAS2L3;HIST2H2AC;H2AFX;CDKN3;GRK6;CDCA2;CENPF;LHX2;CDC45;UBE2C;C2orf7;MCM10;SIX2;HIST1H2BJ;FAM161A;CBX5;RANBP1;HMGB2;EZH2;CCDC109B;FAM72A;FAM72B;PRR11;CACYBP;ARL6IP6;ZNF850;ZNF695;MDC1;FAM72D;SOX18;KIF24;ECT2;MED30;CDC6;PASK;ATAD2;TOMM40;LIN52;USP1;CENPI;SLC25A28;CCDC99;PIM1;UNG;NR2F1;NCAPD3;LOC254559;VRK1;TOP2A;NXT1;SHCBP1;OSBPL6;CDC25C;UHRF1;C21orf58;KLF11;ASF1B;DTL;SRR;CIT;NUP6…	TUBB2C;HIST1H3G;GAS2L3;HIST2H2AC;H2AFX;CDKN3;GRK6;CDCA2;CENPF;LHX2;CDC45;UBE2C;C2orf7;MCM10;SIX2;HIST1H2BJ;FAM161A;CBX5;RANBP1;HMGB2;EZH2;CCDC109B;FAM72A;FAM72B;PRR11;CACYBP;ARL6IP6;ZNF850;ZNF695;MDC1;FAM72D;SOX18;KIF24;ECT2;MED30;CDC6;PASK;ATAD2;TOMM40;LIN52;USP1;CENPI;SLC25A28;CCDC99;PIM1;UNG;NR2F1;NCAPD3;LOC254559;VRK1;TOP2A;NXT1;SHCBP1;OSBPL6;CDC25C;UHRF1;C21orf58;KLF11;ASF1B;DTL;SRR;CIT;NUP6…	15;18;32;37;58;86;115;118;121;137;168;181;185;191;194;221;223;243;244;247;259;275;309;320;328;330;342;345;352;355;365;370;371;381;386;415;426;466;478;530;534;595;608;629;631;640;659;662;680;699;714;719;735;748;778;788;805;806;826;831;841;856;874;895;912;916;931;934;941;942;973;1040;1071;1077;1108;1134;1143;1162;1165;1174;1181;1184;1185;1190;1207;1211;1358;1392;1405;1410;1455;1476;1502;1523;1538;1…
RNAseq_downregulated_genes	101	wgEncodeHaibTfbsHepg2Sin3ak20Pcr1xPkRep2.broadPeak.gz	Sin3Ak-20/HepG2/None	SIN3A	hg19-tss-centered-10kb-chip-encode-taipale-inhouse	0.0690492	3.1813	CENPP;DDX11;ARHGAP11B;DHFR;FAM72A;LOC642846;FAM72D;C2orf7;DDX12;ARHGAP11A;FAM72B;HMGB2;TTF2;MCM8;CKAP2L;FBXO5;LOC81691;MRE11A;RRM2;SHCBP1;FANCD2;BRI3BP;CDC25A;NEK2;MLF1IP;CCNA2;MAD2L1;ORC6;CCNE2;NCAPG;FAM54A;MCM7;UNG;FAM161A;C16orf93;TRIP13;CCNB1;XRCC2;ANLN;C19orf40;NUF2;MAPK8IP2;CTU2;BRCA1;TACC3;ODF2;FANCM;KIF11;KIF24;CLSPN;SASS6;RAD51;PLK1;C15orf42;KPNA2;BRCA2;H2AFX;SGOL1;KIF20A;CASC5;NOP56;LIN…	CENPP;DDX11;ARHGAP11B;DHFR;FAM72A;LOC642846;FAM72D;C2orf7;DDX12;ARHGAP11A;FAM72B;HMGB2;TTF2;MCM8;CKAP2L;FBXO5;LOC81691;MRE11A;RRM2;SHCBP1;FANCD2;BRI3BP;CDC25A;NEK2;MLF1IP;CCNA2;MAD2L1;ORC6;CCNE2;NCAPG;FAM54A;MCM7;UNG;FAM161A;C16orf93;TRIP13;CCNB1;XRCC2;ANLN;C19orf40;NUF2;MAPK8IP2;CTU2;BRCA1;TACC3;ODF2;FANCM;KIF11;KIF24;CLSPN;SASS6;RAD51;PLK1;C15orf42;KPNA2;BRCA2;H2AFX;SGOL1;KIF20A;CASC5;NOP56;LIN…	4;5;32;56;61;77;86;109;110;131;134;150;151;156;158;161;163;169;179;180;186;196;210;219;222;223;226;228;231;234;237;244;245;255;262;266;267;269;270;271;273;274;284;286;291;292;295;300;301;308;313;318;320;324;328;336;341;344;345;347;353;354;358;362;366;371;382;383;400;402;409;410;426;427;431;446;452;454;455;468;474;478;480;483;488;498;511;513;516;518;520;521;522;527;532;536;539;548;555;566;571;572;…
RNAseq_downregulated_genes	102	encode-UW.Motif.0045	UW.Motif.0045		hg19-tss-centered-10kb-10species	0.031877	3.1438	SLC38A3;CEP72;FGFRL1;KIAA1274;RELT;SLCO4A1;CCDC109B;NKD2;RTN4R;ATAD2;DGCR5;NRARP;ZNF232;CENPF;DLL1;H1FX;SH2B2;TRIM59;JAG2;C2CD4C;DUSP9;TUBB2C;NPTX1;IRX4;C12orf34;FGFR3;STARD8;SOX18;TMEM201;HAUS7;RLTPR;KIF26A;HSPA12A;C20orf27;ZNF695;GAS2L3;LINGO1;SUN2;GPRIN1;TP73;FAM161A;FKBP5;SHCBP1;C9orf140;KCNIP3;KIF24;RUNX1T1;UNC5A;RAB3IL1;GAS2L1;PITX1;LGI2;NFIX	SLC38A3;CEP72;FGFRL1;KIAA1274;RELT;SLCO4A1;CCDC109B;NKD2;RTN4R;ATAD2;DGCR5;NRARP;ZNF232;CENPF;DLL1;H1FX;SH2B2;TRIM59;JAG2;C2CD4C;DUSP9;TUBB2C;NPTX1;IRX4;C12orf34;FGFR3;STARD8;SOX18;TMEM201;HAUS7;RLTPR;KIF26A;HSPA12A;C20orf27;ZNF695;GAS2L3;LINGO1;SUN2;GPRIN1;TP73;FAM161A;FKBP5;SHCBP1;C9orf140;KCNIP3;KIF24;RUNX1T1;UNC5A;RAB3IL1;GAS2L1;PITX1;LGI2;NFIX;OLFM1;GRK6;SLC29A1;DUSP7;TFDP1;DIRAS1;GNAZ;CTU2;…	10;12;15;47;76;89;112;118;123;129;135;136;171;184;196;200;208;237;241;244;264;300;314;317;334;339;340;368;371;373;374;380;398;415;439;456;479;491;495;517;534;539;598;607;617;652;706;720;722;738;743;748;757;790;814;872;899;931;961;982;1015;1058;1070;1113;1158;1234;1241;1284;1291;1293;1415;1419;1449;1453;1465;1558;1766;1787;1826;1838;1880;1889;1895;1926;1934;1974;2086;2100;2107;2143;2157;2174;2197;…
RNAseq_downregulated_genes	103	transfac_pro-M01622	F$UGA3_01		hg19-tss-centered-10kb-10species	0.031877	3.1438	PHF17;MIR17HG;HMGN2;HMGB1;PBX3;PLK4;PIM1;RFWD3;ADD3;HMGB2;RAD21;C12orf34;EZH2;LIN9;HIST1H3G;HEY2;FZD8;LHX2;E2F8;ZNF367;FAM161A;FOXD2;KIAA1274;CENPF;PRIMA1;CCNA2;DUSP7;ZIC5;GAS2L3;PBK;RNF219;CCDC109B;EEPD1;TRIM59;NXPH4;ATAD2;LOC254559;MCM10;SIX2;CDKN2C;KNTC1;SRR;DUSP9;GJB2;ATAD5;ANP32E;HUNK;ATP1A3;PPIL5;RUNX1T1;HSPA12A;NRARP;DLL1;DHFR;DMBX1;FGFR3;SLC25A28;NR2F1;ZBTB2;IRX4;BEND3;ONECUT1;MSH5;CENPI;…	PHF17;MIR17HG;HMGN2;HMGB1;PBX3;PLK4;PIM1;RFWD3;ADD3;HMGB2;RAD21;C12orf34;EZH2;LIN9;HIST1H3G;HEY2;FZD8;LHX2;E2F8;ZNF367;FAM161A;FOXD2;KIAA1274;CENPF;PRIMA1;CCNA2;DUSP7;ZIC5;GAS2L3;PBK;RNF219;CCDC109B;EEPD1;TRIM59;NXPH4;ATAD2;LOC254559;MCM10;SIX2;CDKN2C;KNTC1;SRR;DUSP9;GJB2;ATAD5;ANP32E;HUNK;ATP1A3;PPIL5;RUNX1T1;HSPA12A;NRARP;DLL1;DHFR;DMBX1;FGFR3;SLC25A28;NR2F1;ZBTB2;IRX4;BEND3;ONECUT1;MSH5;CENPI;…	4;61;63;70;78;93;127;147;150;153;158;159;178;188;198;199;203;207;208;233;236;255;257;293;294;301;344;352;379;386;389;407;418;424;446;512;513;527;550;552;553;574;578;599;619;620;622;624;628;638;640;642;655;656;664;670;696;707;713;736;744;817;848;871;873;877;878;885;954;958;968;974;977;978;992;1010;1029;1032;1039;1046;1049;1109;1124;1130;1138;1165;1199;1229;1256;1288;1293;1329;1331;1333;1347;1353;1…
RNAseq_downregulated_genes	104	transfac_pro-M00803	V$E2F_Q2	TFDP3,E2F4,E2F3,TFDP1,E2F1	hg19-tss-centered-10kb-10species	0.0315928	3.0856	MMP16;HNRNPD;RFWD3;HMGB1;ZIC5;NR2F1;NXPH4;IRX4;TUBA1B;DHFR;DMBX1;LHX2;CCDC109B;HEY2;PIM1;SAP30;MDC1;ATAD5;H2AFX;PHF17;TUBB;FZD8;PASK;ONECUT1;TRIM59;FGFR3;NPR3;C10orf78;ANP32E;HNRNPAB;USP1;GABRB2;SIX2;SRR;GAS2L3;H1F0;KIAA1274;FAM161A;ERG;MNX1;HIST1H3G;HMGN2;LHX4;TCF19;TMPO;LOC100128191;DLL1;RNF219;PPIL5;OLFM1;SHCBP1;PBX3;MCM10;POLA1;LRRC3;MCM3;C12orf34;MYBL2;PBK;ATAD2;C19orf48;CENPI;TUBB2C;DUSP9;H…	MMP16;HNRNPD;RFWD3;HMGB1;ZIC5;NR2F1;NXPH4;IRX4;TUBA1B;DHFR;DMBX1;LHX2;CCDC109B;HEY2;PIM1;SAP30;MDC1;ATAD5;H2AFX;PHF17;TUBB;FZD8;PASK;ONECUT1;TRIM59;FGFR3;NPR3;C10orf78;ANP32E;HNRNPAB;USP1;GABRB2;SIX2;SRR;GAS2L3;H1F0;KIAA1274;FAM161A;ERG;MNX1;HIST1H3G;HMGN2;LHX4;TCF19;TMPO;LOC100128191;DLL1;RNF219;PPIL5;OLFM1;SHCBP1;PBX3;MCM10;POLA1;LRRC3;MCM3;C12orf34;MYBL2;PBK;ATAD2;C19orf48;CENPI;TUBB2C;DUSP9;H…	60;72;77;91;96;108;120;123;131;142;148;152;159;191;211;247;248;252;268;277;306;335;337;338;349;352;375;386;395;399;413;443;452;470;475;482;483;492;494;495;497;498;502;503;574;575;581;586;593;609;622;623;645;652;672;675;685;706;712;715;725;738;752;755;761;806;807;825;865;880;891;945;967;1005;1022;1028;1038;1066;1093;1105;1114;1115;1124;1182;1191;1209;1218;1223;1255;1256;1265;1300;1316;1342;1345;13…
RNAseq_downregulated_genes	105	transfac_pro-M03862	V$YB1_Q4	NFYC,NFYB,NFYA,YBX1	hg19-tss-centered-10kb-10species	0.0314905	3.06465	FAM72A;FAM72B;FAM72D;TUBB2C;ZIC5;UBE2C;HIST1H3G;TOMM40;H2AFX;CBX5;HMGB1;RFWD3;CDCA2;CDC25C;HIST2H2AC;LHX2;ATAD2;KIF24;MCM10;PASK;CDCA3;PRR11;GAS2L3;HIST1H2BJ;CDC6;TOP2A;ECT2;NR2C2AP;KLF11;MED30;UNG;CENPF;GRK6;ERG;CDKN3;RANBP1;HMGB2;SLC25A28;USP1;FAM161A;MNX1;ORC6;MDC1;DUSP7;TRIM59;SRR;CCDC109B;BEND3;RUNX1T1;EXOSC2;ARHGAP33;C2orf7;H1FX;PIM1;KIF1A;CENPI;CDC45;CACYBP;C12orf34;SORBS3;VRK1;PLCH1;HSPA1…	FAM72A;FAM72B;FAM72D;TUBB2C;ZIC5;UBE2C;HIST1H3G;TOMM40;H2AFX;CBX5;HMGB1;RFWD3;CDCA2;CDC25C;HIST2H2AC;LHX2;ATAD2;KIF24;MCM10;PASK;CDCA3;PRR11;GAS2L3;HIST1H2BJ;CDC6;TOP2A;ECT2;NR2C2AP;KLF11;MED30;UNG;CENPF;GRK6;ERG;CDKN3;RANBP1;HMGB2;SLC25A28;USP1;FAM161A;MNX1;ORC6;MDC1;DUSP7;TRIM59;SRR;CCDC109B;BEND3;RUNX1T1;EXOSC2;ARHGAP33;C2orf7;H1FX;PIM1;KIF1A;CENPI;CDC45;CACYBP;C12orf34;SORBS3;VRK1;PLCH1;HSPA1…	3;4;5;15;16;44;46;65;67;83;110;126;143;153;171;173;182;192;231;232;235;236;263;269;342;351;373;375;385;390;392;393;416;460;475;512;516;545;571;627;661;707;711;724;737;767;787;797;845;867;907;918;940;971;981;1013;1016;1041;1073;1120;1136;1147;1164;1212;1239;1273;1283;1300;1301;1330;1331;1332;1336;1343;1395;1413;1451;1479;1487;1490;1508;1526;1533;1546;1559;1587;1632;1675;1676;1694;1698;1701;1708;17…
RNAseq_downregulated_genes	106	transfac_pro-M00428	V$E2F1_Q3	E2F7,E2F4,E2F3,E2F1,TFDP3,TFDP1	hg19-tss-centered-10kb-10species	0.0314697	3.06038	UHRF1;E2F2;RBL1;DLL1;CCDC109B;DHFR;MCM3;POLA1;MMP16;E2F8;TUBA1B;RRM2;SLC25A19;ZNF367;ZIC5;FAM161A;ZNF850;NR2F1;RNF219;PRKDC;HIST1H3G;MCM7;MCM4;KIAA1274;HMGN2;PBX3;TRIM59;RFWD3;RANBP1;GABRA1;TUBB;MCM6;C13orf27;FGFR3;CASP8AP2;PBK;GAS2L3;CCDC99;LMNB1;DUSP9;MCM5;DPYSL2;ATAD5;NR2C2AP;BEND3;SRR;ZNF232;CENPF;CBX2;IRX4;YBX2;H1F0;MCM10;SSRP1;SUN2;JPH1;E2F1;CDK1;BRI3BP;DMC1;RAD21;PPIL5;CDT1;LHX2;TYRO3;CDC6…	UHRF1;E2F2;RBL1;DLL1;CCDC109B;DHFR;MCM3;POLA1;MMP16;E2F8;TUBA1B;RRM2;SLC25A19;ZNF367;ZIC5;FAM161A;ZNF850;NR2F1;RNF219;PRKDC;HIST1H3G;MCM7;MCM4;KIAA1274;HMGN2;PBX3;TRIM59;RFWD3;RANBP1;GABRA1;TUBB;MCM6;C13orf27;FGFR3;CASP8AP2;PBK;GAS2L3;CCDC99;LMNB1;DUSP9;MCM5;DPYSL2;ATAD5;NR2C2AP;BEND3;SRR;ZNF232;CENPF;CBX2;IRX4;YBX2;H1F0;MCM10;SSRP1;SUN2;JPH1;E2F1;CDK1;BRI3BP;DMC1;RAD21;PPIL5;CDT1;LHX2;TYRO3;CDC6…	3;16;23;35;40;41;58;65;71;85;104;120;122;125;149;155;157;213;227;232;234;242;244;257;317;321;372;389;405;423;439;442;446;456;505;522;526;553;578;603;606;629;659;660;713;722;759;766;780;813;838;873;893;899;900;901;911;918;938;946;1011;1014;1040;1074;1075;1109;1209;1219;1229;1262;1272;1307;1361;1382;1398;1422;1423;1486;1511;1519;1559;1572;1579;1594;1645;1673;1683;1687;1715;1757;1819;1822;1824;1834;…
RNAseq_downregulated_genes	107	wgEncodeHaibTfbsHepg2Sin3ak20Pcr1xPkRep1.broadPeak.gz	Sin3Ak-20/HepG2/None	SIN3A	hg19-tss-centered-10kb-chip-encode-taipale-inhouse	0.0670543	3.04907	FAM72D;DHFR;FAM72A;FAM72B;DDX12;ARHGAP11B;BRCA1;ARHGAP11A;LOC642846;FAM54A;DDX11;SHCBP1;BRI3BP;HIST2H2AC;TTF2;CENPP;TMEM107;NEK2;MCM7;ESCO2;CDC20;BUB1;PRR11;MCM8;CKAP2L;NCAPG;KIF20A;FANCM;KIF15;RRM2;FANCD2;CDC25A;ODF2;GEN1;CEP55;TOPBP1;KIF2C;GSG2;LIN54;NUF2;MYBL2;FBXO5;CASC5;C16orf93;C19orf40;HMGB1;PIM1;ASPM;C15orf42;KPNA2;FAM161A;UNG;RFWD3;KIF18B;C17orf53;KIAA1524;MKI67;CDK1;NUP35;H2AFX;PLK1;TPX…	FAM72D;DHFR;FAM72A;FAM72B;DDX12;ARHGAP11B;BRCA1;ARHGAP11A;LOC642846;FAM54A;DDX11;SHCBP1;BRI3BP;HIST2H2AC;TTF2;CENPP;TMEM107;NEK2;MCM7;ESCO2;CDC20;BUB1;PRR11;MCM8;CKAP2L;NCAPG;KIF20A;FANCM;KIF15;RRM2;FANCD2;CDC25A;ODF2;GEN1;CEP55;TOPBP1;KIF2C;GSG2;LIN54;NUF2;MYBL2;FBXO5;CASC5;C16orf93;C19orf40;HMGB1;PIM1;ASPM;C15orf42;KPNA2;FAM161A;UNG;RFWD3;KIF18B;C17orf53;KIAA1524;MKI67;CDK1;NUP35;H2AFX;PLK1;TPX…	13;24;26;28;45;55;61;64;76;114;115;139;141;144;154;155;161;168;175;179;181;185;194;203;204;213;222;223;229;232;235;238;239;242;252;254;257;267;269;273;276;278;284;292;295;301;306;308;314;320;335;339;340;349;352;356;365;366;368;369;370;382;386;393;401;404;406;413;416;421;435;436;438;444;447;453;459;462;464;467;470;477;484;489;491;502;511;515;516;522;526;530;544;547;548;551;562;567;575;583;588;592;…
RNAseq_downregulated_genes	108	homer-M00248	Unknown3/Arabidopsis-Promoters/Homer		hg19-tss-centered-10kb-10species	0.0312992	3.02546	RAD21;GTSE1;DUSP7;EZH2;CCNF;TRIM59;GJB2;FAM72B;FAM72A;CDKN2D;RUNX1T1;E2F8;FAM72D;LIN9;NR2F1;PIM1;GPSM2;ZIC5;GAS2L3;ZNF232;TUBA1C;HMGB1;TUBB2C;FAM161A;DMC1;KIAA1274;CP110;SIX2;PHF17;HSPA12A;PPIL5;CCDC109B;CSRP2;ATAD5;CACYBP;ONECUT1;RFWD3;FGFR3;SLC25A28;C18orf54;DPP4;HNRNPAB;HEY2;PLCH1;IRX4;CENPF;KIAA0101;HMGN2;HMGB2;DHFR;PKMYT1;ARID5A;DUSP9;C1orf96;RACGAP1P;RAD51;KCNH2;LHX4;NUSAP1;CDC7;GMNN;MNX1;C…	RAD21;GTSE1;DUSP7;EZH2;CCNF;TRIM59;GJB2;FAM72B;FAM72A;CDKN2D;RUNX1T1;E2F8;FAM72D;LIN9;NR2F1;PIM1;GPSM2;ZIC5;GAS2L3;ZNF232;TUBA1C;HMGB1;TUBB2C;FAM161A;DMC1;KIAA1274;CP110;SIX2;PHF17;HSPA12A;PPIL5;CCDC109B;CSRP2;ATAD5;CACYBP;ONECUT1;RFWD3;FGFR3;SLC25A28;C18orf54;DPP4;HNRNPAB;HEY2;PLCH1;IRX4;CENPF;KIAA0101;HMGN2;HMGB2;DHFR;PKMYT1;ARID5A;DUSP9;C1orf96;RACGAP1P;RAD51;KCNH2;LHX4;NUSAP1;CDC7;GMNN;MNX1;C…	11;24;58;64;68;78;80;88;90;95;98;106;136;139;168;170;183;202;210;221;234;240;258;278;292;302;319;351;408;410;412;430;443;455;488;512;553;559;575;615;625;642;643;656;658;659;663;679;690;735;742;757;760;786;853;859;884;893;895;899;949;961;962;979;985;1011;1032;1047;1058;1072;1097;1098;1114;1127;1160;1165;1188;1194;1211;1286;1348;1350;1379;1383;1409;1427;1471;1536;1551;1595;1611;1634;1635;1649;1658;…
	6351	encode-UW.Motif.0373	UW.Motif.0373		hg19-tss-centered-10kb-10species	0.0152183	-0.281574
	6352	transfac_pro-M00702	P$SPF1_Q2		hg19-tss-centered-10kb-10species	0.0152183	-0.281574
	6353	transfac_pro-M01268	V$FXR_Q2	NR1H4,VDR	hg19-tss-centered-10kb-10species	0.0152183	-0.281574
	6354	yetfasco-1594	YDR216W		hg19-tss-centered-10kb-10species	0.0152183	-0.281574
	6355	jaspar-MA0380.1	SIP4		hg19-tss-centered-10kb-10species	0.0152164	-0.282049
	6356	yetfasco-1000	YGL192W	METTL3	hg19-tss-centered-10kb-10species	0.0152164	-0.282049
	6357	yetfasco-973	YGL181W		hg19-tss-centered-10kb-10species	0.0152164	-0.282049
	6358	jaspar-MA0058.1	MAX	ARNTL,MYCN,ARNT,MAX,USF2,USF1,MXI1,MYC,ARNTL2	hg19-tss-centered-10kb-10species	0.0152145	-0.282523
	6359	tiffin-TIFDMEM0000044	TIFDMEM0000044		hg19-tss-centered-10kb-10species	0.0152145	-0.282523
	6360	wgEncodeHaibTfbsHl60NrsfV0422111PkRep2.broadPeak.gz	NRSF/HL-60/None	REST	hg19-tss-centered-10kb-chip-encode-taipale-inhouse	0.0173625	-0.282787
	6361	elemento-TCCTCGTC	TCCTCGTC		hg19-tss-centered-10kb-10species	0.0152127	-0.282998
	6362	transfac_pro-M00391	F$UAY_Q2		hg19-tss-centered-10kb-10species	0.0152127	-0.282998
	6363	transfac_pro-M01319	V$HOXB5_01	HOXC8,VAX2,VAX1,HOXC5,HOXC4,HOXC6,RHOXF2,ALX3,MEOX1,NOBOX,LHX1,LHX2,LHX3,BSX,LHX5,LHX6,GSX2,LHX9,ALX1,EN2,NKX1-2,HOXB6,VSX2,DLX5,DLX1,RAX,DLX2,RAX2,HOXB8,HOXD8,LBX2,HOXB3,EVX1,HOXD1,HOXB4,HOXB5,PAX4,PAX7,BARX1,NKX1-1,RHOXF2B,HOXD3,VSX1,IRF6,ESX1,ARX,EMX2,VENTX,EVX2,EMX1,HOXA7,HOXA6,HOXA5,SHOX2,HOXA3,HOXA2,HOXA1,LHX8,PDX1,PRRX2,POU2F1	hg19-tss-centered-10kb-10species	0.0152108	-0.283473
	6364	yetfasco-1696	YPR065W		hg19-tss-centered-10kb-10species	0.0152108	-0.283473
	6365	GSM1208657_batch1_chrom1_LoVo_NFAT5_PassedQC_peaks_hg19	NFAT5/Lovo	NFAT5	hg19-tss-centered-10kb-chip-encode-taipale-inhouse	0.017355	-0.283559
	6366	wgEncodeHaibTfbsHct116Pol24h8V0416101PkRep1.broadPeak.gz	Pol2-4H8/HCT-116/None	POLR2A	hg19-tss-centered-10kb-chip-encode-taipale-inhouse	0.017355	-0.283559
	6367	homer-M00372	br-Z4/dmmpmm(Bigfoot)/fly		hg19-tss-centered-10kb-10species	0.0152089	-0.283947
	6368	yetfasco-877	YDR421W		hg19-tss-centered-10kb-10species	0.0152089	-0.283947
	6369	jaspar-PF0053.1	RYTGCNNRGNAAC	RFX1	hg19-tss-centered-10kb-10species	0.0152071	-0.284422
	6370	elemento-CAGGTGA	CAGGTGA		hg19-tss-centered-10kb-10species	0.0152052	-0.284897
	6371	transfac_pro-M01349	V$HB9_01	HOXC8,ISX,VAX2,ALX3,HOXC5,RHOXF2,HOXC6,RHOXF2B,MNX1,NOBOX,GBX2,LHX2,LHX4,LHX6,LHX8,LHX9,ALX1,GSX1,ALX4,EN1,EN2,NKX1-2,VSX2,DLX5,MSX2,RAX,POU3F2,HOXB8,HOXD8,LBX2,HOXB3,BARX1,EVX1,HOXD1,HOXB7,BARX2,PAX4,PAX7,SHOX2,MSX1,PHOX2A,NKX1-1,PHOX2B,NKX6-3,DBX2,PRRX2,ESX1,ARX,EMX2,EVX2,HOXA7,GSX2,PAX6,HOXA3,HOXA1,PRRX1,PDX1,GBX1	hg19-tss-centered-10kb-10species	0.0152052	-0.284897
	6372	hdpi-DDEFL1	DDEFL1	ASAP3	hg19-tss-centered-10kb-10species	0.0152033	-0.285371
	6373	tfdimers-MD00019	Pax-4_Pax-4	HNF1A,DBX1	hg19-tss-centered-10kb-10species	0.0152033	-0.285371
	6374	transfac_pro-M01300	V$HMGA2_01	HMGA2	hg19-tss-centered-10kb-10species	0.0152033	-0.285371
	6375	taipale-AACAVBTGTT-MYF6-full	AACAVBTGTT-MYF6-full		hg19-tss-centered-10kb-10species	0.0152015	-0.285846
	6376	encode-UW.Motif.0555	UW.Motif.0555		hg19-tss-centered-10kb-10species	0.0151996	-0.286321
	6377	flyfactorsurvey-salr-F3-5_SOLEXA_FBgn0000287	FBgn0000287(salr)	SALL4,ZNF236,SALL1,SALL3,SALL2	hg19-tss-centered-10kb-10species	0.0151996	-0.286321
	6378	tfdimers-MD00105	IRF-8_PUR1	IRF3,IRF2,IRF1,IRF7,IRF5,IRF4,ZNF683,IRF9,IRF8,PRDM1	hg19-tss-centered-10kb-10species	0.0151996	-0.286321
	6379	flyfactorsurvey-sens-2_SANGER_2.5_FBgn0051632	FBgn0051632(sens-2)	GFI1B,GFI1	hg19-tss-centered-10kb-10species	0.0151977	-0.286795
	6380	jaspar-MA0121.1	ARR10		hg19-tss-centered-10kb-10species	0.0151977	-0.286795
	6381	tfdimers-MD00547	AP-2alpha_FOXM1		hg19-tss-centered-10kb-10species	0.0151977	-0.286795
	6382	transfac_pro-M01240	V$BEN_01	GTF2IRD1	hg19-tss-centered-10kb-10species	0.0151977	-0.286795
	6383	transfac_public-M00362	I$TCF_1	TCF4,TCF7,LEF1,TCF7L2,TCF7L1	hg19-tss-centered-10kb-10species	0.0151977	-0.286795
	6384	flyfactorsurvey-BH1_Cell_FBgn0011758	FBgn0011758(B-H1)	TLX2,TLX1,BARHL2,BARHL1,TLX3	hg19-tss-centered-10kb-10species	0.0151959	-0.28727
	6385	flyfactorsurvey-Tup_Cell_FBgn0003896	FBgn0003896(tup)	ISL1,ISL2	hg19-tss-centered-10kb-10species	0.0151959	-0.28727
	6386	homer-M00261	ABF1/SacCer-Promoters/Homer		hg19-tss-centered-10kb-10species	0.0151959	-0.28727
	6387	tiffin-TIFDMEM0000119	TIFDMEM0000119		hg19-tss-centered-10kb-10species	0.0151959	-0.28727
	6388	transfac_pro-M02363	I$SLOU_01	HOXC8,ISL1,ISL2,HOXC5,HOXC4,HOXC6,VENTX,TLX3,MEOX1,MEOX2,GBX2,GBX1,PHOX2B,BSX,LHX5,LHX6,LHX8,LHX9,EVX2,UNCX,LBX2,HOXA4,LMX1B,RAX,RAX2,HOXB8,LBX1,HOXD8,LHX1,HOXD4,HOXB3,DRGX,HOXB6,LHX2,HOXB4,HOXD1,EVX1,PRRX1,LHX3,PHOX2A,LHX4,HOXB5,NKX6-2,NKX6-3,NKX6-1,LMX1A,BARHL2,BARHL1,ARX,HOXD3,EMX2,TLX1,TLX2,EMX1,NKX1-1,HOXA6,HOXA5,NKX1-2,HOXA3,OTP,PDX1,PRRX2	hg19-tss-centered-10kb-10species	0.0151959	-0.28727
	6389	yetfasco-1409	YHL009C	IRF6,HOXA6,HOXA5,HOXA3,HOXA2,PDX1,DLX5,MEOX1	hg19-tss-centered-10kb-10species	0.0151959	-0.28727
	6390	tfdimers-MD00322	YY1_MZF1		hg19-tss-centered-10kb-10species	0.015194	-0.287745
	6391	transfac_pro-M01089	I$KR_Q6		hg19-tss-centered-10kb-10species	0.015194	-0.287745
	6392	yetfasco-1053	YBL005W		hg19-tss-centered-10kb-10species	0.0151921	-0.288219
	6393	yetfasco-1070	YCR106W		hg19-tss-centered-10kb-10species	0.0151921	-0.288219
	6394	yetfasco-1769	YLR228C		hg19-tss-centered-10kb-10species	0.0151921	-0.288219
	6395	taipale-NCCACTTAA-Nkx3-1-DBD	NCCACTTAA-Nkx3-1-DBD	NKX2-2,NKX3-2,NKX3-1	hg19-tss-centered-10kb-10species	0.0151884	-0.289169
	6396	transfac_public-M00144	V$PAX5_02	PAX5	hg19-tss-centered-10kb-10species	0.0151884	-0.289169
	6397	wgEncodeHaibTfbsEcc1NrsfV0422111PkRep2.broadPeak.gz	NRSF/ECC-1/None	REST	hg19-tss-centered-10kb-chip-encode-taipale-inhouse	0.017299	-0.289349
	6398	encode-UW.Motif.0610	UW.Motif.0610		hg19-tss-centered-10kb-10species	0.0151865	-0.289643
	6399	transfac_pro-M01016	V$SOX17_01	SOX17	hg19-tss-centered-10kb-10species	0.0151865	-0.289643
	6400	transfac_public-M00201	V$CEBP_C	CEBPB,CEBPA	hg19-tss-centered-10kb-10species	0.0151847	-0.290118
	6401	yetfasco-63	YNL068C	FOXO3,FOXA2,SRF,FOXK1,FOXJ3	hg19-tss-centered-10kb-10species	0.0151847	-0.290118
	6402	stark-AAAAGCT	AAAAGCT		hg19-tss-centered-10kb-10species	0.0151828	-0.290593
	6403	wgEncodeHaibTfbsMcf7NrsfV0422111PkRep1.broadPeak.gz	NRSF/MCF-7/None	REST	hg19-tss-centered-10kb-chip-encode-taipale-inhouse	0.0172859	-0.290699
	6404	transfac_pro-M01181	V$NKX32_01	NKX3-2	hg19-tss-centered-10kb-10species	0.0151791	-0.291542
	6405	jaspar-MA0064.1	PBF		hg19-tss-centered-10kb-10species	0.0151772	-0.292017
	6406	GSM1208630_batch1_chrom1_LoVo_HES4_PassedQC_peaks_hg19	HES4/Lovo	HES4	hg19-tss-centered-10kb-chip-encode-taipale-inhouse	0.0172729	-0.29205
	6407	encode-UW.Motif.0659	UW.Motif.0659		hg19-tss-centered-10kb-10species	0.0151754	-0.292491
	6408	tfdimers-MD00527	AREB6_IRF	IRF3,IRF2,IRF1,STAT1,IRF7,IRF6,IRF5,IRF4,IRF9,IRF8,STAT2	hg19-tss-centered-10kb-10species	0.0151754	-0.292491
	6409	transfac_pro-M00993	V$TAL1_Q6	TAL1,ATOH1	hg19-tss-centered-10kb-10species	0.0151735	-0.292966
	6410	transfac_pro-M02235	P$TGA1A_01		hg19-tss-centered-10kb-10species	0.0151735	-0.292966
	6411	stark-AWNTGGGTCA	AWNTGGGTCA	RORC,RORB,RORA,PPARG,PPARD,PPARA,NR1D1,NR1D2	hg19-tss-centered-10kb-10species	0.0151716	-0.293441
	6412	tfdimers-MD00479	ISL1_AP-1	LHX2,FOS,LHX9,FOSB,JUNB,JUN,JUND,FOSL1,FOSL2	hg19-tss-centered-10kb-10species	0.0151716	-0.293441
	6413	yetfasco-1572	YDR310C		hg19-tss-centered-10kb-10species	0.0151716	-0.293441
	6414	wgEncodeHaibTfbsHct116NrsfV0422111PkRep1.broadPeak.gz	NRSF/HCT-116/None	REST	hg19-tss-centered-10kb-chip-encode-taipale-inhouse	0.0172524	-0.294173
	6415	elemento-TCATGTC	TCATGTC		hg19-tss-centered-10kb-10species	0.0151679	-0.29439
	6416	transfac_pro-M03140	I$CG34031_01		hg19-tss-centered-10kb-10species	0.015166	-0.294865
	6417	wgEncodeHaibTfbsGm12878Bclaf101388V0416101PkRep2.broadPeak.gz	BCLAF1_(SC-101388)/GM12878/None	BCLAF1	hg19-tss-centered-10kb-chip-encode-taipale-inhouse	0.0172412	-0.295331
	6418	jaspar-MF0005.1	Forkhead_class	FOXQ1,FOXJ1,FOXJ2,NF1,FOXD3,FOXA1,RRN3,FOXA3,FOXA2,FOXL2,FOXF1,FOXF2,FOXL1,FOXI1,FOXH1	hg19-tss-centered-10kb-10species	0.0151642	-0.295339
	6419	transfac_pro-M03788	V$CARRXR_Q2		hg19-tss-centered-10kb-10species	0.0151642	-0.295339
	6420	transfac_public-M00359	P$BZIP911_02		hg19-tss-centered-10kb-10species	0.0151642	-0.295339
	6421	yetfasco-495	YBL054W		hg19-tss-centered-10kb-10species	0.0151642	-0.295339
	6422	elemento-CAAGAAGG	CAAGAAGG		hg19-tss-centered-10kb-10species	0.0151623	-0.295814
	6423	hdpi-H2AFY	H2AFY	SEMA4A,H2AFY	hg19-tss-centered-10kb-10species	0.0151623	-0.295814
	6424	tfdimers-MD00550	TEF-1_PITX3	TEAD1,TEAD4	hg19-tss-centered-10kb-10species	0.0151623	-0.295814
	6425	flyfactorsurvey-br-PL_SANGER_5_FBgn0000210	FBgn0000210(br)		hg19-tss-centered-10kb-10species	0.0151586	-0.296763
	6426	homer-M00455	CG12361/dmmpmm(Noyes_hd)/fly	HOXC8,HOXB8,HOXD8,CDX1,CDX2,CDX4,HOXA10,HOXA7,HOXB7,HOXA9	hg19-tss-centered-10kb-10species	0.0151586	-0.296763
	6427	yetfasco-1460	YFR034C	MYCN,ARNT,MAX,MNT,USF2,USF1,MXI1,MYC	hg19-tss-centered-10kb-10species	0.0151586	-0.296763
	6428	jaspar-CN0081.1	LM81		hg19-tss-centered-10kb-10species	0.0151567	-0.297238
	6429	stark-GRGGTCAYS	GRGGTCAYS(usp)	RXRG,RXRA,RXRB	hg19-tss-centered-10kb-10species	0.0151548	-0.297713
	6430	transfac_pro-M01015	P$PEND_01		hg19-tss-centered-10kb-10species	0.015153	-0.298188
	6431	transfac_pro-M02735	V$ARID3A_04	HOXC8,NOBOX,VAX1,HOXC5,HOXC4,HOXC6,RHOXF2,POU1F1,VAX2,LHX1,LHX3,RHOXF2B,LHX5,LHX6,ALX3,LHX9,ALX1,UNCX,ALX4,EN2,NKX1-2,VSX1,PROP1,MSX1,MEF2C,RAX,POU3F2,DBX2,POU3F4,LBX2,LMX1A,HOXB4,LMX1B,PAX4,PAX7,SHOX2,PHOX2A,LHX4,PHOX2B,NKX6-3,NKX6-1,ARID3A,DBX1,MEF2BNB-MEF2B,PAX6,ESX1,ARX,HOXD3,EMX2,EMX1,HOXA7,MEF2B,MEF2A,HOXA4,MEF2D,OTP,PRRX2,POU2F1	hg19-tss-centered-10kb-10species	0.015153	-0.298188
	6432	wgEncodeSydhTfbsK562Rfx5IggrabPk.narrowPeak.gz	RFX5_(200-401-194)/K562/None	RFX5	hg19-tss-centered-10kb-chip-encode-taipale-inhouse	0.0172057	-0.298998
	6433	transfac_pro-M01883	V$IRF4_Q6	IRF4	hg19-tss-centered-10kb-10species	0.0151492	-0.299137
	6434	jaspar-MA0038.1	Gfi	GFI1B,GFI1	hg19-tss-centered-10kb-10species	0.0151474	-0.299612
	6435	transfac_pro-M01446	V$BARHL2_01	HMX1,HMX3,HMX2,BARHL2,BARHL1,ISL2,HOXD1,BARX2,EN1,SHOX2,MSX1,PRRX2,VAX2	hg19-tss-centered-10kb-10species	0.0151474	-0.299612
	6436	transfac_pro-M02295	I$CG18599_01	HOXC8,NOBOX,BSX,PRRX1,HOXC5,HOXC4,HOXB5,HOXC6,VENTX,HOXD4,NKX1-2,ALX3,MEOX1,MEOX2,VAX2,GBX2,LHX2,LHX3,LHX4,LHX5,LHX6,HOXA6,GSX2,LHX9,ALX1,GSX1,RHOXF2,EN1,EN2,HOXA4,HOXB6,MSX1,RAX,RAX2,HOXB8,DRGX,HOXD8,LHX1,LBX2,HOXB3,LBX1,EVX1,HOXD1,HOXB4,EVX2,PAX4,PAX7,PAX6,PHOX2A,RHOXF2B,HOXD3,NKX6-2,NKX6-3,NKX6-1,DBX2,PRRX2,ESX1,ARX,EMX2,EMX1,NKX1-1,LHX8,HOXA5,SHOX2,HOXA3,OTP,PDX1,GBX1,POU2F1	hg19-tss-centered-10kb-10species	0.0151474	-0.299612
	6437	transfac_pro-M03155	I$TLL_01		hg19-tss-centered-10kb-10species	0.0151474	-0.299612
	6438	transfac_pro-M03789	V$CHREBP_Q6	MLXIPL,BHLHE40,ARNT	hg19-tss-centered-10kb-10species	0.0151474	-0.299612
	6439	jaspar-MA0071.1	RORA_1	NR2F1,ESRRA,RORB,RORA,RORC	hg19-tss-centered-10kb-10species	0.0151455	-0.300086
	6440	transfac_public-M00118	V$MYCMAX_01	MYCN,ARNT,MAX,MNT,USF2,USF1,MXI1,MYC	hg19-tss-centered-10kb-10species	0.0151455	-0.300086
	6441	stark-TGACANNTTGAC	TGACANNTTGAC		hg19-tss-centered-10kb-10species	0.0151436	-0.300561
	6442	tfdimers-MD00154	SREBP1_MZF1	ZNF444,SP2,ZNF467,ZNF281	hg19-tss-centered-10kb-10species	0.0151436	-0.300561
	6443	transfac_pro-M01658	V$AML1_Q4	RUNX2,RUNX1	hg19-tss-centered-10kb-10species	0.0151436	-0.300561
	6444	transfac_pro-M02104	V$NFE2_Q6	FOSL2,JUNB,SPI1,FOS,NFE2L3,NFE2L2,NFE2L1,MAF,JUN,JUND,FOSB,MAFK,FOSL1,NFE2,BACH2,BATF,MAFB,BACH1,MAFF,MAFG	hg19-tss-centered-10kb-10species	0.0151436	-0.300561
	6445	wgEncodeSydhTfbsH1hescTbpIggrabPk.narrowPeak.gz	TBP/H1-hESC/None	TBP	hg19-tss-centered-10kb-chip-encode-taipale-inhouse	0.017187	-0.300927
	6446	encode-UW.Motif.0325	UW.Motif.0325		hg19-tss-centered-10kb-10species	0.0151418	-0.301036
	6447	taipale-TGAATNNNNATTCA-Sox1-DBD	TGAATNNNNATTCA-Sox1-DBD		hg19-tss-centered-10kb-10species	0.0151418	-0.301036
	6448	transfac_public-M00289	V$HFH3_01	FOXJ1,FOXJ2,FOXD3,FOXA1,RRN3,FOXA3,FOXA2,FOXF1,FOXF2,FOXL1,FOXI1,FOXH1	hg19-tss-centered-10kb-10species	0.0151418	-0.301036
	6449	elemento-AGCAGCT	AGCAGCT		hg19-tss-centered-10kb-10species	0.0151399	-0.30151
	6450	jaspar-MA0051.1	IRF2	IRF3,IRF2,IRF1,IRF7,STAT2,STAT1,IRF4,ZNF683,IRF9,IRF8,IRF5,PRDM1,IRF6	hg19-tss-centered-10kb-10species	0.0151399	-0.30151
	6451	jaspar-PF0033.1	YTATTTTNR		hg19-tss-centered-10kb-10species	0.0151399	-0.30151
	6452	yetfasco-1962	YLR182W		hg19-tss-centered-10kb-10species	0.015138	-0.301985
	6453	yetfasco-2000	YHR084W		hg19-tss-centered-10kb-10species	0.015138	-0.301985
	6454	wgEncodeSydhTfbsGm08714Znf274UcdPk.narrowPeak.gz	ZNF274/GM08714/None	ZNF274	hg19-tss-centered-10kb-chip-encode-taipale-inhouse	0.0171758	-0.302085
	6455	wgEncodeSydhTfbsGm12878Srebp2IggrabPk.narrowPeak.gz	SREBP2/GM12878/None	SREBF2	hg19-tss-centered-10kb-chip-encode-taipale-inhouse	0.0171758	-0.302085
	6456	flyfactorsurvey-Hth_Cell_FBgn0001235	FBgn0001235(hth)		hg19-tss-centered-10kb-10species	0.0151362	-0.30246
	6457	hdpi-PAX3	PAX3	PAX3	hg19-tss-centered-10kb-10species	0.0151362	-0.30246
	6458	transfac_pro-M00684	V$XPF1_Q6		hg19-tss-centered-10kb-10species	0.0151362	-0.30246
	6459	tfdimers-MD00344	CBF	(core	hg19-tss-centered-10kb-10species	0.0151343	-0.302934
	6460	transfac_pro-M01643	F$NHP10_01		hg19-tss-centered-10kb-10species	0.0151343	-0.302934
	6461	yetfasco-1695	YPR065W		hg19-tss-centered-10kb-10species	0.0151343	-0.302934
	6462	elemento-TGGCAAC	TGGCAAC	RFX8,RFX4,RFX6,RFX1,RFX2,RFX3	hg19-tss-centered-10kb-10species	0.0151324	-0.303409
	6463	taipale-NATCAATKNYAGTGATN-SOX8-DBD	NATCAATKNYAGTGATN-SOX8-DBD		hg19-tss-centered-10kb-10species	0.0151324	-0.303409
	6464	transfac_pro-M01833	F$LEU3_Q6		hg19-tss-centered-10kb-10species	0.0151324	-0.303409
	6465	yetfasco-1172	YML081W		hg19-tss-centered-10kb-10species	0.0151324	-0.303409
	6466	transfac_pro-M00644	V$LBP1_Q6		hg19-tss-centered-10kb-10species	0.0151306	-0.303884
	6467	transfac_pro-M01202	V$VDRRXR_01	NR1I3,NR1I2,VDR,RXRA,RXRB	hg19-tss-centered-10kb-10species	0.0151306	-0.303884
	6468	transfac_pro-M01468	V$DLX2_01	HOXC8,NOBOX,VAX1,HOXC6,RAX,ALX3,MEOX1,VAX2,MEF2C,LHX2,BSX,MEF2B,GSX2,ALX1,MEF2A,EN2,NKX1-2,HOXB6,VSX2,DLX4,DLX5,DLX1,DLX2,DLX3,HOXB8,HOXD8,LBX2,HOXB3,EVX1,HOXD1,HOXD3,PAX4,PAX7,BARX1,HOXB5,IRF6,MEF2BNB-MEF2B,ESX1,GBX1,HOXA7,HOXA6,HOXA5,SHOX2,HOXA3,HOXA2,HOXA1,MEF2D,PDX1,PRRX2	hg19-tss-centered-10kb-10species	0.0151306	-0.303884
	6469	transfac_pro-M00317	V$LDSPOLYA_B		hg19-tss-centered-10kb-10species	0.0151287	-0.304358
	6470	transfac_pro-M03574	V$GCMA_Q4	GCM1,GCM2	hg19-tss-centered-10kb-10species	0.0151287	-0.304358
	6471	encode-UW.Motif.0517	UW.Motif.0517		hg19-tss-centered-10kb-10species	0.0151268	-0.304833
	6472	homer-M01477	DIG1/DIG1_YPD/32-STE12(Harbison)/Yeast		hg19-tss-centered-10kb-10species	0.015125	-0.305308
	6473	transfac_pro-M02064	V$CETS2_02	ERF,ERG,ELF1,ELF3,ELF2,ELF5,ELF4,SPI1,ETS2,ETS1,GABPB1,FLI1,FEV,SPIC,ETV1,EHF,ETV3,ETV2,ETV5,ETV4,ETV7,ETV6,SPDEF,SPIB,ELK3,ELK1,ELK4,GABPA	hg19-tss-centered-10kb-10species	0.015125	-0.305308
	6474	tiffin-TIFDMEM0000065	TIFDMEM0000065		hg19-tss-centered-10kb-10species	0.0151231	-0.305782
	6475	transfac_pro-M02799	V$SOX15_03	SOX21,SOX18,SOX30,NANOG,SOX11,SOX12,SOX13,SOX14,SOX15,SOX17,SOX8,SOX9,SRY,SOX7,SOX4,SOX5	hg19-tss-centered-10kb-10species	0.0151212	-0.306257
	6476	tfdimers-MD00197	MZF1_c-Myb	SPI1	hg19-tss-centered-10kb-10species	0.0151194	-0.306732
	6477	transfac_pro-M03572	V$DEC1_Q2	BHLHE40,USF2	hg19-tss-centered-10kb-10species	0.0151194	-0.306732
	6478	yetfasco-554	YKL043W		hg19-tss-centered-10kb-10species	0.0151194	-0.306732
	6479	elemento-CATCCTG	CATCCTG		hg19-tss-centered-10kb-10species	0.0151175	-0.307206
	6480	taipale-WAWRTAAAYAWW-FOXC2-DBD	WAWRTAAAYAWW-FOXC2-DBD	FOXP3,FOXK1,FOXG1,FOXO3,FOXO1,FOXM1,FOXO6,FOXO4,FOXI1,FOXF1,NF1,FOXQ1,FOXJ1,FOXJ2,FOXJ3,SRF,FOXF2,FOXD3,FOXD1,RRN3,FOXL2,FOXL1,FOXH1,FOXA1,FOXA3,FOXA2,FOXC1	hg19-tss-centered-10kb-10species	0.0151175	-0.307206
	6481	transfac_pro-M02045	F$RFX1_02	RFX8,RFX4,RFX6,RFX1,RFX2,RFX3	hg19-tss-centered-10kb-10species	0.0151156	-0.307681
	6482	yetfasco-2237	YBR150C		hg19-tss-centered-10kb-10species	0.0151156	-0.307681
	6483	transfac_pro-M01617	F$ZMS1_01		hg19-tss-centered-10kb-10species	0.0151119	-0.30863
	6484	yetfasco-1119	YHR178W		hg19-tss-centered-10kb-10species	0.0151119	-0.30863
	6485	wgEncodeHaibTfbsH1hescNanogsc33759V0416102PkRep2.broadPeak.gz	NANOG_(SC-33759)/H1-hESC/None	NANOG	hg19-tss-centered-10kb-chip-encode-taipale-inhouse	0.0171087	-0.309033
	6486	jaspar-MA0110.1	ATHB-5		hg19-tss-centered-10kb-10species	0.01511	-0.309105
	6487	transfac_pro-M02298	I$VSX2_01	VAX1,PRRX1,HOXC6,LHX1,GBX1,LHX3,LHX4,LHX5,LHX6,HOXA6,GSX2,UNCX,RAX,RAX2,GBX2,LMX1A,DRGX,HOXB6,HOXD1,HOXB5,PAX4,SHOX2,LMX1B,NKX6-2,NKX6-3,NKX6-1,TLX1,TLX2,TLX3,NKX1-1,LHX8,HOXA5,NKX1-2,OTP,PDX1,PRRX2	hg19-tss-centered-10kb-10species	0.01511	-0.309105
	6488	yetfasco-2126	YPL248C		hg19-tss-centered-10kb-10species	0.0151082	-0.30958
	6489	yetfasco-651	YDL170W		hg19-tss-centered-10kb-10species	0.0151082	-0.30958
	6490	homer-M00078	GFY(?)/Promoter/Homer	ZNF143	hg19-tss-centered-10kb-10species	0.0151063	-0.310054
	6491	homer-M00685	Kr/dmmpmm(SeSiMCMC)/fly		hg19-tss-centered-10kb-10species	0.0151044	-0.310529
	6492	tfdimers-MD00307	MAFA_MAFA		hg19-tss-centered-10kb-10species	0.0151044	-0.310529
	6493	transfac_pro-M02332	I$BSH_01	HOXC8,ISL1,ISL2,HOXC5,HOXC4,HOXC6,VENTX,EMX1,MEOX1,MEOX2,GBX2,LHX2,BSX,LHX6,LHX8,LHX9,HOXA4,HOXB3,HOXB8,HOXD8,HOXD4,EVX1,HOXB6,HOXD1,HOXB4,EVX2,HOXB5,BARHL2,BARHL1,HOXD3,EMX2,TLX1,TLX2,TLX3,NKX1-1,HOXA6,HOXA5,NKX1-2,HOXA3,GBX1	hg19-tss-centered-10kb-10species	0.0151044	-0.310529
	6494	yetfasco-2135	YLR451W		hg19-tss-centered-10kb-10species	0.0151044	-0.310529
	6495	yetfasco-2179	YBR150C		hg19-tss-centered-10kb-10species	0.0151044	-0.310529
	6496	wgEncodeHaibTfbsPanc1NrsfPcr2xPkRep1.broadPeak.gz	NRSF/PANC-1/None	REST	hg19-tss-centered-10kb-chip-encode-taipale-inhouse	0.0170937	-0.310577
	6497	wgEncodeHaibTfbsA549Usf1V0422111Etoh02PkRep1.broadPeak.gz	USF-1/A549/EtOH_0.02pct	USF1	hg19-tss-centered-10kb-chip-encode-taipale-inhouse	0.01709	-0.310962
	6498	encode-UW.Motif.0581	UW.Motif.0581		hg19-tss-centered-10kb-10species	0.0151026	-0.311004
	6499	transfac_pro-M02081	V$ISL2_04		hg19-tss-centered-10kb-10species	0.0151026	-0.311004
	6500	stark-GCCATT	GCCATT(pho)	YY1,YY2	hg19-tss-centered-10kb-10species	0.0151007	-0.311478
	6501	transfac_pro-M01054	P$BHLH66_01	BHLHE40,HES5,HES7	hg19-tss-centered-10kb-10species	0.0151007	-0.311478
	6502	wgEncodeHaibTfbsK562Usf1V0416101PkRep1.broadPeak.gz	USF-1/K562/None	USF1	hg19-tss-centered-10kb-chip-encode-taipale-inhouse	0.0170825	-0.311734
	6503	transfac_pro-M00442	P$ABF_Q2	MYCN,CREB3L2,ARNT,MAX,USF2,USF1,MXI1,MYC,ATF3,CREB3L1	hg19-tss-centered-10kb-10species	0.0150988	-0.311953
	6504	transfac_pro-M00662	I$SGF3_Q6		hg19-tss-centered-10kb-10species	0.0150988	-0.311953
	6505	yetfasco-2050	YDL106C		hg19-tss-centered-10kb-10species	0.0150988	-0.311953
	6506	wgEncodeHaibTfbsH1hescAtf3V0416102PkRep2.broadPeak.gz	ATF3/H1-hESC/None	ATF3	hg19-tss-centered-10kb-chip-encode-taipale-inhouse	0.0170769	-0.312313
	6507	transfac_pro-M01105	V$ZBRK1_01	ZNF615,ZNF350	hg19-tss-centered-10kb-10species	0.015097	-0.312428
	6508	yetfasco-1080	YNL139C	THOC2	hg19-tss-centered-10kb-10species	0.015097	-0.312428
	6509	yetfasco-1150	YML007W		hg19-tss-centered-10kb-10species	0.015097	-0.312428
	6510	flyfactorsurvey-CG12768_SANGER_5_FBgn0037206	FBgn0037206(CG12768)		hg19-tss-centered-10kb-10species	0.0150951	-0.312902
	6511	transfac_pro-M02801	V$SOX18_03	SOX18,SOX21,SOX30,NANOG,SOX11,SOX12,SOX13,SOX14,SOX15,SOX8,SOX9,SRY,SOX6,SOX7,SOX4,SOX5	hg19-tss-centered-10kb-10species	0.0150951	-0.312902
	6512	yetfasco-1650	YDL056W		hg19-tss-centered-10kb-10species	0.0150951	-0.312902
	6513	encode-UW.Motif.0516	UW.Motif.0516		hg19-tss-centered-10kb-10species	0.0150914	-0.313852
	6514	yetfasco-619	YKL032C		hg19-tss-centered-10kb-10species	0.0150914	-0.313852
	6515	encode-UW.Motif.0654	UW.Motif.0654		hg19-tss-centered-10kb-10species	0.0150895	-0.314326
	6516	tfdimers-MD00005	Kid3_TCF-4	TCF7L2	hg19-tss-centered-10kb-10species	0.0150895	-0.314326
	6517	wgEncodeSydhTfbsHek293Tcf7l2UcdPk.narrowPeak.gz	TCF7L2/HEK293/None	TCF7L2	hg19-tss-centered-10kb-chip-encode-taipale-inhouse	0.0170545	-0.314629
	6518	encode-UW.Motif.0551	UW.Motif.0551		hg19-tss-centered-10kb-10species	0.0150858	-0.315276
	6519	taipale-TTACGTAA-GMEB2-DBD	TTACGTAA-GMEB2-DBD	GMEB1	hg19-tss-centered-10kb-10species	0.0150858	-0.315276
	6520	taipale-YTAATTAN-VSX1-DBD	YTAATTAN-VSX1-DBD	NOBOX,PRRX1,VENTX,VAX2,LHX1,LHX2,LHX3,LHX5,LHX6,GSX2,LHX9,EN2,RAX,RAX2,GBX2,LBX2,HOXB3,EVX1,HOXD1,EVX2,PAX4,PAX7,PRRX2,ARX,EMX2,EMX1,NKX1-1,LHX8,NKX1-2,HOXA3,OTP,PDX1,GBX1	hg19-tss-centered-10kb-10species	0.0150858	-0.315276
	6521	transfac_pro-M03064	V$OBOX2_02	OTX1,OTX2,GSC,PITX2,PITX3,PITX1	hg19-tss-centered-10kb-10species	0.0150858	-0.315276
	6522	encode-UW.Motif.0470	UW.Motif.0470		hg19-tss-centered-10kb-10species	0.0150839	-0.31575
	6523	tfdimers-MD00554	CDP_p300		hg19-tss-centered-10kb-10species	0.0150839	-0.31575
	6524	yetfasco-1482	YMR042W	SRF	hg19-tss-centered-10kb-10species	0.0150839	-0.31575
	6525	yetfasco-1886	YMR019W		hg19-tss-centered-10kb-10species	0.0150839	-0.31575
	6526	yetfasco-2155	YFR034C	MYCN,ARNT,MAX,USF1,MXI1,MYC	hg19-tss-centered-10kb-10species	0.0150839	-0.31575
	6527	wgEncodeHaibTfbsH1hescUsf1Pcr1xPkRep2.broadPeak.gz	USF-1/H1-hESC/None	USF1	hg19-tss-centered-10kb-chip-encode-taipale-inhouse	0.0170433	-0.315787
	6528	homer-M00216	SeqBias:	SRF,MEF2BNB-MEF2B,MEF2C,MEF2B,MEF2A,MEF2D	hg19-tss-centered-10kb-10species	0.015082	-0.316225
	6529	homer-M00224	SeqBias:		hg19-tss-centered-10kb-10species	0.0150802	-0.3167
	6530	stark-GGGTCA	GGGTCA(Hr46)	RORC,RORB,RORA,NR2F2	hg19-tss-centered-10kb-10species	0.0150802	-0.3167
	6531	taipale-NNYMATTANN-Hoxa2-DBD	NNYMATTANN-Hoxa2-DBD	HOXC8,NOBOX,VAX1,ISL1,ISL2,HOXC5,HOXC4,HOXC6,HOXA7,VENTX,RAX,MNX1,MEOX1,MEOX2,VAX2,LHX1,LHX2,LHX3,LHX4,LHX5,LHX6,HOXA6,GSX2,LHX9,ALX1,GSX1,UNCX,HOXD4,EN2,NKX1-2,HOXB6,VSX2,DLX5,LMX1B,DLX1,DLX2,DLX3,RAX2,HOXB8,DRGX,HOXD8,GBX2,LBX2,HOXB3,LBX1,EVX1,HOXD1,HOXB4,HOXD3,BARX2,PAX4,PAX7,SHOX2,MSX1,BSX,HOXB5,NKX6-2,NKX6-3,NKX6-1,LMX1A,IRF6,ARX,GBX1,EMX2,EVX2,EMX1,NKX1-1,LHX8,HOXA5,HOXA4,HOXA3,HOXA2,HOXA1,…	hg19-tss-centered-10kb-10species	0.0150802	-0.3167
	6532	yetfasco-1870	YER068W	CNOT4	hg19-tss-centered-10kb-10species	0.0150802	-0.3167
	6533	transfac_public-M00102	V$CDP_02	CUX1,CUX2	hg19-tss-centered-10kb-10species	0.0150783	-0.317174
	6534	wgEncodeHaibTfbsHl60Pol24h8V0422111PkRep1.broadPeak.gz	Pol2-4H8/HL-60/None	POLR2A	hg19-tss-centered-10kb-chip-encode-taipale-inhouse	0.0170265	-0.317524
	6535	transfac_pro-M02083	P$ATH1_01		hg19-tss-centered-10kb-10species	0.0150764	-0.317649
	6536	yetfasco-1229	YNL103W		hg19-tss-centered-10kb-10species	0.0150764	-0.317649
	6537	encode-UW.Motif.0435	UW.Motif.0435		hg19-tss-centered-10kb-10species	0.0150746	-0.318124
	6538	hdpi-SMCR7L	SMCR7L	SMCR7L,SNAPC4	hg19-tss-centered-10kb-10species	0.0150746	-0.318124
	6539	homer-M00214	Znf263(Zf)/K562-Znf263-ChIP-Seq/Homer	ZNF263	hg19-tss-centered-10kb-10species	0.0150746	-0.318124
	6540	yetfasco-1175	YJL056C		hg19-tss-centered-10kb-10species	0.0150746	-0.318124
	6541	wgEncodeSydhTfbsHepg2Rad21IggrabPk.narrowPeak.gz	Rad21/HepG2/None	RAD21	hg19-tss-centered-10kb-chip-encode-taipale-inhouse	0.0170172	-0.318489
	6542	yetfasco-1660	YMR070W		hg19-tss-centered-10kb-10species	0.0150727	-0.318598
	6543	yetfasco-1815	YDL056W		hg19-tss-centered-10kb-10species	0.0150727	-0.318598
	6544	GSM1208688_batch1_chrom1_LoVo_TCF12_PassedQC_peaks_hg19	TCF12/Lovo	TCF12	hg19-tss-centered-10kb-chip-encode-taipale-inhouse	0.0170135	-0.318875
	6545	transfac_pro-M02907	V$SOX21_04	SOX21,SOX18,SOX30,NANOG,SOX11,SOX12,SOX13,SOX15,SOX17,SOX8,SOX9,SOX7,SOX4,SOX5	hg19-tss-centered-10kb-10species	0.0150708	-0.319073
	6546	transfac_pro-M02940	V$ZIC2_05	BCL11A,ZIC2,ZIC3,ZIC1	hg19-tss-centered-10kb-10species	0.0150708	-0.319073
	6547	yetfasco-1182	YML099C	RFX8,MEF2BNB-MEF2B,HIRA,RFX4,ZNF683,RFX6,RFX1,RFX2,RFX3,MEF2C,MEF2B,TGIF2LY,TGIF2LX,PRDM1,PRDM2,MEF2D,MEF2A,TGIF2,TGIF1	hg19-tss-centered-10kb-10species	0.0150708	-0.319073
	6548	GSM1208625_batch1_chrom1_LoVo_GMEB1_PassedQC_peaks_hg19	GMEB1/Lovo	GMEB1	hg19-tss-centered-10kb-chip-encode-taipale-inhouse	0.0170023	-0.320033
	6549	wgEncodeSydhTfbsHepg2TbpIggrabPk.narrowPeak.gz	TBP/HepG2/None	TBP	hg19-tss-centered-10kb-chip-encode-taipale-inhouse	0.0169948	-0.320805
	6550	transfac_public-M00167	F$HSF_02	HSF1,HSF2,HSF4	hg19-tss-centered-10kb-10species	0.0150634	-0.320972
	6551	homer-M00526	btd/dmmpmm(Noyes)/fly	SP8,SP9,KLF17,SP3,SP4,SP5,SP6,SP7	hg19-tss-centered-10kb-10species	0.0150615	-0.321446
	6552	transfac_pro-M01812	P$TGA2_Q2		hg19-tss-centered-10kb-10species	0.0150615	-0.321446
	6553	yetfasco-1222	YLR451W	RFX8,MEF2BNB-MEF2B,RFX4,ZNF683,RFX6,RFX1,RFX2,RFX3,MEF2C,MEF2B,MEF2A,PRDM1,PRDM2,MEF2D	hg19-tss-centered-10kb-10species	0.0150615	-0.321446
	6554	transfac_pro-M01670	F$SPT2_01		hg19-tss-centered-10kb-10species	0.0150578	-0.322396
	6555	elemento-CATAAAA	CATAAAA		hg19-tss-centered-10kb-10species	0.0150559	-0.32287
	6556	yetfasco-1721	YBR083W		hg19-tss-centered-10kb-10species	0.0150559	-0.32287
	6557	wgEncodeHaibTfbsK562Cbx3sc101004V0422111PkRep1.broadPeak.gz	CBX3_(SC-101004)/K562/None	CBX3	hg19-tss-centered-10kb-chip-encode-taipale-inhouse	0.0169724	-0.32312
	6558	wgEncodeSydhTfbsMcf10aesStat3Etoh01StdPk.narrowPeak.gz	STAT3/MCF10A-Er-Src/EtOH_0.01pct	STAT3	hg19-tss-centered-10kb-chip-encode-taipale-inhouse	0.0169724	-0.32312
	6559	transfac_pro-M03790	V$FXR_Q5	NR1H4	hg19-tss-centered-10kb-10species	0.0150541	-0.323345
	6560	wgEncodeSydhTfbsHelas3Chd2IggrabPk.narrowPeak.gz	CHD2_(AB68301)/HeLa-S3/None	CHD2	hg19-tss-centered-10kb-chip-encode-taipale-inhouse	0.0169687	-0.323506
	6561	homer-M00295	MF0005.1_Forkhead_class/Jaspar	FOXQ1,FOXJ1,FOXJ2,FOXJ3,NF1,FOXD3,FOXA1,RRN3,FOXA3,FOXA2,FOXL2,FOXF1,FOXF2,FOXL1,FOXI1,FOXH1	hg19-tss-centered-10kb-10species	0.0150522	-0.32382
	6562	transfac_pro-M01194	P$PDF2_01		hg19-tss-centered-10kb-10species	0.0150522	-0.32382
	6563	transfac_pro-M01522	F$AFT1_01		hg19-tss-centered-10kb-10species	0.0150522	-0.32382
	6564	transfac_pro-M02839	V$ARID3A_02	ARID3A	hg19-tss-centered-10kb-10species	0.0150522	-0.32382
	6565	yetfasco-818	YGL071W		hg19-tss-centered-10kb-10species	0.0150522	-0.32382
	6566	wgEncodeHaibTfbsEcc1NrsfV0422111PkRep1.broadPeak.gz	NRSF/ECC-1/None	REST	hg19-tss-centered-10kb-chip-encode-taipale-inhouse	0.0169631	-0.324085
	6567	tiffin-TIFDMEM0000051	TIFDMEM0000051		hg19-tss-centered-10kb-10species	0.0150503	-0.324294
	6568	yetfasco-2178	YPL128C		hg19-tss-centered-10kb-10species	0.0150503	-0.324294
	6569	wgEncodeSydhTfbsHelas3Brf1StdPk.narrowPeak.gz	BRF1/HeLa-S3/None	BRF1	hg19-tss-centered-10kb-chip-encode-taipale-inhouse	0.0169575	-0.324664
	6570	taipale-NGYAATWAAAN-Hoxa11-DBD	NGYAATWAAAN-Hoxa11-DBD	HOXC8,HOXB8,HOXB9,HOXD8,CDX1,CDX2,HOXB6,CDX4,HOXD10,HOXA10,HOXA6,HOXA5,HOXB5,HOXC6,HOXA9	hg19-tss-centered-10kb-10species	0.0150485	-0.324769
	6571	tfdimers-MD00109	Cdx-2_TBP		hg19-tss-centered-10kb-10species	0.0150466	-0.325244
	6572	tfdimers-MD00247	HOXA10_CRX		hg19-tss-centered-10kb-10species	0.0150466	-0.325244
	6573	flyfactorsurvey-CG17181_SANGER_5_FBgn0035144	FBgn0035144(CG17181)	MYOD1,SCRT1,SCRT2,SNAI2,SNAI3,SNAI1,ATOH8	hg19-tss-centered-10kb-10species	0.0150447	-0.325718
	6574	transfac_pro-M02745	V$EHF_06	ERF,ERG,ELF1,ELF3,ELF2,ELF5,ELF4,SPI1,ETS2,ETS1,GABPB1,FLI1,FEV,SPIC,ETV1,EHF,ETV3,ETV2,ETV5,ETV4,ETV7,ETV6,SPDEF,SPIB,ELK3,ELK1,ELK4,GABPA	hg19-tss-centered-10kb-10species	0.0150447	-0.325718
	6575	tfdimers-MD00093	SREBP_GR	TCF4,TCF3,MYF6,ARID5B,MYF5,ASCL1,TCF12,MYOG,MYOD1	hg19-tss-centered-10kb-10species	0.0150429	-0.326193
	6576	transfac_public-M00076	V$GATA2_01	GATA2,GATA1	hg19-tss-centered-10kb-10species	0.0150429	-0.326193
	6577	yetfasco-885	YHR206W		hg19-tss-centered-10kb-10species	0.0150429	-0.326193
	6578	transfac_public-M00110	I$ELF1_01	GRHL1,GRHL2,GRHL3	hg19-tss-centered-10kb-10species	0.015041	-0.326668
	6579	GSM1208739_batch2_chrom1_LoVo_ETV7_PassedQC_peaks_hg19	ETV7/Lovo	ETV7	hg19-tss-centered-10kb-chip-encode-taipale-inhouse	0.016937	-0.326787
	6580	encode-UW.Motif.0093	UW.Motif.0093		hg19-tss-centered-10kb-10species	0.0150391	-0.327142
	6581	taipale-ATGAATWYCATTCAT-SOX18-full	ATGAATWYCATTCAT-SOX18-full		hg19-tss-centered-10kb-10species	0.0150391	-0.327142
	6582	transfac_pro-M01003	V$HELIOSA_01	IKZF2	hg19-tss-centered-10kb-10species	0.0150391	-0.327142
	6583	transfac_pro-M02909	V$SOX5_07	SOX21,SOX18,SOX11,SOX13,SOX15,SOX8,SOX4,SOX5	hg19-tss-centered-10kb-10species	0.0150391	-0.327142
	6584	transfac_public-M00023	V$HOX13_01	HOXA5	hg19-tss-centered-10kb-10species	0.0150391	-0.327142
	6585	tiffin-TIFDMEM0000038	TIFDMEM0000038		hg19-tss-centered-10kb-10species	0.0150373	-0.327617
	6586	transfac_pro-M03111	V$TGIF1_01	MEIS3,MEIS2,MEIS1,TGIF2,TGIF1,PKNOX1,PKNOX2	hg19-tss-centered-10kb-10species	0.0150373	-0.327617
	6587	encode-UW.Motif.0261	UW.Motif.0261		hg19-tss-centered-10kb-10species	0.0150354	-0.328092
	6588	stark-MATTAAWNATGCR	MATTAAWNATGCR		hg19-tss-centered-10kb-10species	0.0150354	-0.328092
	6589	swissregulon-ONECUT1-2.p2	ONECUT2,ONECUT1	ONECUT2,ONECUT1	hg19-tss-centered-10kb-10species	0.0150354	-0.328092
	6590	transfac_pro-M01861	V$ATF1_Q6_01	CREB1,CREM,ATF5,ATF4,ATF7,ATF6,ATF1,ATF3,ATF2	hg19-tss-centered-10kb-10species	0.0150335	-0.328566
	6591	tfdimers-MD00205	GATA_SRY		hg19-tss-centered-10kb-10species	0.0150298	-0.329516
	6592	transfac_pro-M01807	F$INO2:INO4_01		hg19-tss-centered-10kb-10species	0.0150298	-0.329516
	6593	hdpi-JDP2	JDP2	JDP2	hg19-tss-centered-10kb-10species	0.0150279	-0.32999
	6594	taipale-TAATYRATTA-PAX7-DBD	TAATYRATTA-PAX7-DBD	PAX7,PAX3	hg19-tss-centered-10kb-10species	0.0150279	-0.32999
	6595	wgEncodeHaibTfbsK562Ctcflsc98982V0416101PkRep1.broadPeak.gz	CTCFL_(SC-98982)/K562/None	CTCFL	hg19-tss-centered-10kb-chip-encode-taipale-inhouse	0.0168959	-0.331033
	6596	wgEncodeHaibTfbsPfsk1NrsfV0416101PkRep2.broadPeak.gz	NRSF/PFSK-1/None	REST	hg19-tss-centered-10kb-chip-encode-taipale-inhouse	0.0168941	-0.331226
	6597	yetfasco-1225	MATA1		hg19-tss-centered-10kb-10species	0.0150205	-0.331889
	6598	transfac_pro-M01427	V$NKX12_01	ISL2,LHX1,LHX2,LHX3,LHX4,LHX5,LHX6,LHX8,LHX9,RAX,HOXD8,HOXD4,EVX1,HOXD1,HOXD3,ESX1,SHOX2,NKX6-3,BARHL1,NKX1-1,NKX1-2,PRRX1,PRRX2,HOXC8,NOBOX,POU3F2,HOXC5,HOXC4,HOXC6,VENTX,MNX1,GSX2,EVX2,GSX1,EN1,EN2,VSX1,VSX2,DLX5,DLX1,DLX2,HOXB8,LBX2,HOXB3,LMX1A,HOXB7,HOXB4,HOXB5,PAX4,PAX7,PAX6,RHOXF2B,LMX1B,IRF6,MEF2BNB-MEF2B,MEF2C,MEF2B,MEF2A,MEF2D,PDX1,ISX,VAX2,VAX1,MEOX1,GBX2,GBX1,BSX,HOXB6,POU1F1,BARX2,BAR…	hg19-tss-centered-10kb-10species	0.0150186	-0.332364
	6599	yetfasco-1325	YIL056W		hg19-tss-centered-10kb-10species	0.0150186	-0.332364
	6600	GSM1208743_batch2_chrom1_LoVo_ZFHX3_PassedQC_peaks_hg19	ZFHX3/Lovo	ZFHX3	hg19-tss-centered-10kb-chip-encode-taipale-inhouse	0.016881	-0.332576
	6601	GSM1208674_batch1_chrom1_LoVo_SMAD2_PassedQC_peaks_hg19	SMAD2/Lovo	SMAD2	hg19-tss-centered-10kb-chip-encode-taipale-inhouse	0.0168791	-0.332769
	6602	elemento-CAGGTGC	CAGGTGC		hg19-tss-centered-10kb-10species	0.0150149	-0.333313
	6603	tfdimers-MD00366	MTF1_MOVO-B		hg19-tss-centered-10kb-10species	0.0150149	-0.333313
	6604	transfac_pro-M01461	V$EMX2_01	HOXA7,ISX,VAX2,VAX1,RAX2,ALX3,HOXC5,HOXC4,OTP,HOXC6,NKX1-2,MNX1,NOBOX,GBX2,LHX2,LHX3,LHX4,LHX6,LHX8,LHX9,ALX1,GSX1,UNCX,ALX4,HNF1B,EN1,EN2,HOXA4,VSX1,PROP1,VSX2,MSX1,MSX2,DLX1,RAX,BSX,POU3F2,HOXB8,HOXD8,HOXC8,RHOXF2,HOXB3,BARX1,DRGX,EVX1,HOXD1,HOXB4,HOXB5,BARX2,PAX4,PAX7,SHOX2,HOXB7,DLX5,PHOX2A,RHOXF2B,PHOX2B,LBX2,NKX6-3,DBX2,PRRX2,IRF6,BARHL1,ESX1,ARX,HOXD3,EMX2,EVX2,NKX1-1,GSX2,HOXA5,PAX6,HOXA3…	hg19-tss-centered-10kb-10species	0.0150149	-0.333313
	6605	transfac_public-M00266	I$CROC_01	FOXJ2,FOXS1,FOXA1,FOXA3,FOXA2,FOXI1,FOXI2,FOXC2,FOXC1	hg19-tss-centered-10kb-10species	0.0150149	-0.333313
	6606	yetfasco-861	YPR196W		hg19-tss-centered-10kb-10species	0.0150149	-0.333313
	6607	yetfasco-940	YJR060W	ARNTL,HELT,TFEC,TFEB,BHLHE40,MXI1,ARNT,USF2,USF1,TFE3,MAX,MITF,ARNTL2,ATF3	hg19-tss-centered-10kb-10species	0.0150149	-0.333313
	6608	wgEncodeHaibTfbsGm12878Irf4sc6059Pcr1xPkRep1.broadPeak.gz	IRF4_(SC-6059)/GM12878/None	IRF4	hg19-tss-centered-10kb-chip-encode-taipale-inhouse	0.0168698	-0.333734
	6609	elemento-CTTCATC	CTTCATC		hg19-tss-centered-10kb-10species	0.015013	-0.333788
	6610	elemento-TAATTAA	TAATTAA	POU3F2,LHX3,LHX5,VAX1,LHX1,HOXC5,ALX1,LMX1A,HOXC4,HOXB4,LMX1B,SHOX2,VSX1,PROP1,ALX4,OTP,UNCX,PHOX2B,NKX6-3,NKX6-1	hg19-tss-centered-10kb-10species	0.015013	-0.333788
	6611	encode-UW.Motif.0347	UW.Motif.0347		hg19-tss-centered-10kb-10species	0.015013	-0.333788
	6612	transfac_pro-M01314	V$LHX61_01	ISL2,LHX1,LHX2,LHX3,LHX4,LHX5,LHX6,LHX8,LHX9,RAX,HOXD8,HOXD4,EVX1,HOXD1,HOXD3,ESX1,SHOX2,NKX6-3,NKX6-1,BARHL1,NKX1-1,NKX1-2,PRRX1,PRRX2,HOXC8,NOBOX,POU3F2,HOXC5,HOXC4,HOXC6,VENTX,MNX1,GSX2,EVX2,GSX1,EN1,EN2,VSX1,VSX2,DLX5,DLX1,HOXB8,LBX2,HOXB3,LBX1,LMX1A,HOXB7,HOXB4,HOXB5,PAX4,PAX7,PAX6,BSX,LMX1B,IRF6,MEF2BNB-MEF2B,MEF2C,MEF2B,MEF2A,MEF2D,PDX1,ISX,VAX2,VAX1,GBX2,GBX1,RHOXF2B,POU1F1,BARX2,BARX1,EM…	hg19-tss-centered-10kb-10species	0.0150111	-0.334262
	6613	yetfasco-1431	YKL015W	TBPL2,TBPL1,MYB,SRF,MEF2BNB-MEF2B,TBP,SNAPC4,JAZF1,MEF2C,MEF2B,MEF2A,MEF2D,MYBL1,MYBL2	hg19-tss-centered-10kb-10species	0.0150111	-0.334262
	6614	tfdimers-MD00514	YY1_TTF-1	(Nkx2-1)	hg19-tss-centered-10kb-10species	0.0150093	-0.334737
	6615	transfac_public-M00414	V$AREB6_03	TCF4,TCF3,LMO2,SNAI2,SNAI3,SNAI1,ZEB1	hg19-tss-centered-10kb-10species	0.0150093	-0.334737
	6616	hdpi-MEIS3	MEIS3	MEIS3	hg19-tss-centered-10kb-10species	0.0150074	-0.335212
	6617	homer-M00594	bab1/dmmpmm(Pollard)/fly		hg19-tss-centered-10kb-10species	0.0150074	-0.335212
	6618	transfac_pro-M01303	V$SP1_02	EGR1,SP1,SP2,SP3,SP4,KLF5,BCL6B	hg19-tss-centered-10kb-10species	0.0150055	-0.335686
	6619	flyfactorsurvey-Hbn_SOLEXA_FBgn0008636	FBgn0008636(hbn)	HOXC8,ISL1,NOBOX,VAX1,BSX,HOXB8,PRRX1,ISL2,HOXC5,HOXC4,HOXB5,HOXC6,HOXA7,VENTX,TLX3,ALX3,MEOX1,MEOX2,VAX2,LHX1,GBX1,LHX3,LHX4,LHX5,LHX6,HOXA6,GSX2,LHX9,ALX1,GSX1,UNCX,RHOXF2,NKX6-3,LBX2,EN2,HOXA4,HOXB6,LBX1,HOXB3,DLX5,LMX1B,RAX,DLX3,RAX2,POU3F1,LHX2,HOXD8,POU3F4,HOXD4,LMX1A,DRGX,EVX1,HOXD1,HOXB4,HOXD3,PAX4,PAX7,SHOX2,RHOXF2B,EVX2,NKX6-2,GBX2,NKX6-1,POU1F1,ESX1,ARX,EMX2,TLX1,TLX2,EMX1,NKX1-1,LHX8,…	hg19-tss-centered-10kb-10species	0.0150037	-0.336161
	6620	tiffin-TIFDMEM0000021	TIFDMEM0000021		hg19-tss-centered-10kb-10species	0.0150037	-0.336161
	6621	wgEncodeHaibTfbsU87NrsfPcr2xPkRep1.broadPeak.gz	NRSF/U87/None	REST	hg19-tss-centered-10kb-chip-encode-taipale-inhouse	0.0168437	-0.336436
	6622	encode-UW.Motif.0172	UW.Motif.0172		hg19-tss-centered-10kb-10species	0.0150018	-0.336636
	6623	transfac_pro-M01116	V$CLOCKBMAL_Q6	ARNTL,MAX,MYC,USF1,ARNTL2	hg19-tss-centered-10kb-10species	0.0150018	-0.336636
	6624	transfac_pro-M01131	V$SOX10_Q6	SOX10	hg19-tss-centered-10kb-10species	0.0150018	-0.336636
	6625	wgEncodeHaibTfbsHepg2NrsfV0416101PkRep2.broadPeak.gz	NRSF/HepG2/None	REST	hg19-tss-centered-10kb-chip-encode-taipale-inhouse	0.0168381	-0.337015
	6626	jaspar-MA0011.1	br_Z2		hg19-tss-centered-10kb-10species	0.0149999	-0.33711
	6627	tfdimers-MD00399	NF-AT4_ELF5	SPIB,SPIC,SPI1,ELF5,ETV4	hg19-tss-centered-10kb-10species	0.0149999	-0.33711
	6628	transfac_public-M00380	V$PAX4_04	TBPL2,TBPL1,ZNF384,SRF,MEF2BNB-MEF2B,MEF2B,TBP,ZNF362,MEF2C,PAX4,MEF2A,MEF2D	hg19-tss-centered-10kb-10species	0.0149999	-0.33711
	6629	yetfasco-1221	YKL032C	RFX8,MEF2BNB-MEF2B,RFX4,RFX6,RFX1,RFX2,RFX3,MEF2C,MEF2B,MEF2A,MEF2D	hg19-tss-centered-10kb-10species	0.0149999	-0.33711
	6630	elemento-TGGTGCC	TGGTGCC		hg19-tss-centered-10kb-10species	0.0149981	-0.337585
	6631	taipale-WAACCRCAN-RUNX2-DBD	WAACCRCAN-RUNX2-DBD	RUNX3,CBFB	hg19-tss-centered-10kb-10species	0.0149981	-0.337585
	6632	wgEncodeHaibTfbsGm12878NrsfPcr2xPkRep1.broadPeak.gz	NRSF/GM12878/None	REST	hg19-tss-centered-10kb-chip-encode-taipale-inhouse	0.0168325	-0.337594
	6633	transfac_public-M00503	P$ATHB5_01		hg19-tss-centered-10kb-10species	0.0149962	-0.33806
	6634	yetfasco-1148	YOR230W		hg19-tss-centered-10kb-10species	0.0149962	-0.33806
	6635	transfac_pro-M00390	F$FACBALL_Q2		hg19-tss-centered-10kb-10species	0.0149943	-0.338534
	6636	transfac_pro-M02938	V$ZFP740_04	ZNF740	hg19-tss-centered-10kb-10species	0.0149943	-0.338534
	6637	elemento-CGCACCA	CGCACCA		hg19-tss-centered-10kb-10species	0.0149925	-0.339009
	6638	transfac_pro-M03132	N$MXL1MDL1_01	MYCN,TCF3,ARNT,BHLHE40,MXI1,USF2,USF1,MAX,MYC	hg19-tss-centered-10kb-10species	0.0149925	-0.339009
	6639	homer-M00373	byn/dmmpmm(Bigfoot)/fly	TBX19,T	hg19-tss-centered-10kb-10species	0.0149906	-0.339484
	6640	elemento-AGGACGA	AGGACGA		hg19-tss-centered-10kb-10species	0.0149887	-0.339958
	6641	flyfactorsurvey-Hmx_SOLEXA_FBgn0085448	FBgn0085448	BSX,BARHL2,BARHL1,ISL1,ISL2,UNCX,NKX1-1,NKX1-2	hg19-tss-centered-10kb-10species	0.0149887	-0.339958
	6642	taipale-GGGGTCAAAGGTCA-Rxra-DBD	GGGGTCAAAGGTCA-Rxra-DBD	NR2F6,HNF4A,HNF4G,NR2E3,NR2F1,RXRA,NR2F2,NR2C2,PPARG,PPARD,PPARA	hg19-tss-centered-10kb-10species	0.0149887	-0.339958
	6643	taipale-NATGAATKNYATTCATN-Sox3-DBD	NATGAATKNYATTCATN-Sox3-DBD		hg19-tss-centered-10kb-10species	0.0149887	-0.339958
	6644	yetfasco-1717	YHR084W		hg19-tss-centered-10kb-10species	0.0149887	-0.339958
	6645	transfac_pro-M00338	V$ATF_B	JDP2,JUND,CREB1,CREM,ATF5,ATF4,ATF7,ATF6,ATF1,ATF3,ATF2	hg19-tss-centered-10kb-10species	0.0149869	-0.340433
	6646	wgEncodeHaibTfbsHct116MaxV0422111PkRep2.broadPeak.gz	Max/HCT-116/None	MAX	hg19-tss-centered-10kb-chip-encode-taipale-inhouse	0.0168026	-0.340682
	6647	encode-UW.Motif.0132	UW.Motif.0132		hg19-tss-centered-10kb-10species	0.014985	-0.340908
	6648	homer-M01806	FHL1(MacIsaac)/Yeast	JAZF1,FOXN4,FOXH1,FOXN1,FOXN2,FOXN3	hg19-tss-centered-10kb-10species	0.014985	-0.340908
	6649	flyfactorsurvey-Antp_Cell_FBgn0000095	FBgn0000095	HOXC8,HOXC5,HOXC4,HOXC6,VENTX,EMX1,MEOX1,MEOX2,EVX2,HOXD1,HOXB8,HOXD8,HOXD4,HOXB3,HOXB6,HOXB7,HOXB4,HOXD3,EVX1,HOXB5,NKX6-2,NKX6-3,NKX6-1,EMX2,TLX1,TLX2,TLX3,HOXA7,HOXA6,HOXA5,HOXA4,HOXA3,PDX1	hg19-tss-centered-10kb-10species	0.0149831	-0.341382
	6650	stark-TWTKACKTAANA	TWTKACKTAANA(gt)		hg19-tss-centered-10kb-10species	0.0149831	-0.341382
	6651	encode-UW.Motif.0097	UW.Motif.0097		hg19-tss-centered-10kb-10species	0.0149775	-0.342806
	6652	taipale-NTGMATAATTAATKAG-POU4F2-DBD	NTGMATAATTAATKAG-POU4F2-DBD	HOXA6,LHX9,HOXB6,HOXA5,HOXB5,POU4F1,POU4F2,POU4F3,EMX2,EMX1,HOXC6	hg19-tss-centered-10kb-10species	0.0149775	-0.342806
	6653	transfac_pro-M00440	P$CG1_Q6	USF2,USF1,HES5,HES7	hg19-tss-centered-10kb-10species	0.0149775	-0.342806
	6654	transfac_pro-M02259	V$MYCN_01	MAX,MYC,MNT,MYCN,MXI1	hg19-tss-centered-10kb-10species	0.0149775	-0.342806
	6655	yetfasco-1967	YNL216W		hg19-tss-centered-10kb-10species	0.0149775	-0.342806
	6656	homer-M00630	HLHm5/dmmpmm(Pollard)/fly	HES1,HES2,HES4,HES5,HES7	hg19-tss-centered-10kb-10species	0.0149757	-0.343281
	6657	homer-M01809	RLR1(MacIsaac)/Yeast	THOC2	hg19-tss-centered-10kb-10species	0.0149757	-0.343281
	6658	yetfasco-633	YMR037C		hg19-tss-centered-10kb-10species	0.0149757	-0.343281
	6659	homer-M00364	abd-A/dmmpmm(Bigfoot)/fly		hg19-tss-centered-10kb-10species	0.0149738	-0.343756
	6660	wgEncodeHaibTfbsA549Ets1V0422111Etoh02PkRep1.broadPeak.gz	ETS1/A549/EtOH_0.02pct	ETS1	hg19-tss-centered-10kb-chip-encode-taipale-inhouse	0.0167728	-0.343769
	6661	wgEncodeHaibTfbsU87NrsfPcr2xPkRep2.broadPeak.gz	NRSF/U87/None	REST	hg19-tss-centered-10kb-chip-encode-taipale-inhouse	0.0167728	-0.343769
	6662	transfac_pro-M01483	V$DBX1_01	HOXC8,DBX2,HOXB8,ISL2,HOXC5,HOXC4,HOXC6,NKX1-2,LHX1,LHX3,LHX5,ALX3,LHX9,ALX1,UNCX,ALX4,HNF1B,HNF1A,VSX1,PROP1,MSX1,POU3F2,POU3F1,HOXD8,POU3F4,LBX2,LMX1A,HOXB4,LMX1B,BARX2,ESX1,PAX7,SHOX2,PHOX2A,PHOX2B,NKX6-3,NKX6-1,POU1F1,DBX1,PAX6,TLX2,HOXA7,HOXA4,ARID3A,OTP,PRRX2,POU4F3,POU2F1	hg19-tss-centered-10kb-10species	0.0149701	-0.344705
	6663	yetfasco-1549	YML065W		hg19-tss-centered-10kb-10species	0.0149701	-0.344705
	6664	yetfasco-596	YML007W		hg19-tss-centered-10kb-10species	0.0149701	-0.344705
	6665	flyfactorsurvey-dys_tgo_SANGER_5_FBgn0039411	FBgn0039411(dys)	NPAS4	hg19-tss-centered-10kb-10species	0.0149682	-0.34518
	6666	transfac_public-M00277	V$LMO2COM_01	TCF4,MYOD1,MYF6,ZEB1,LMO2,TCF3,NHLH2,NHLH1,TCF12,SNAI2,SNAI3,SNAI1,MYOG	hg19-tss-centered-10kb-10species	0.0149682	-0.34518
	6667	yetfasco-2083	YBL005W		hg19-tss-centered-10kb-10species	0.0149682	-0.34518
	6668	elemento-GTGTGACC	GTGTGACC		hg19-tss-centered-10kb-10species	0.0149663	-0.345655
	6669	encode-UW.Motif.0448	UW.Motif.0448		hg19-tss-centered-10kb-10species	0.0149663	-0.345655
	6670	tfdimers-MD00361	HNF3_GATA	FOXA1,FOXA3,FOXA2	hg19-tss-centered-10kb-10species	0.0149663	-0.345655
	6671	homer-M01815	YAP6(MacIsaac)/Yeast	HLF,ATF2,TEF,NFIL3	hg19-tss-centered-10kb-10species	0.0149645	-0.346129
	6672	selexconsensus-bin	bin	FOXQ1,FOXL2,FOXF1,FOXF2,FOXL1	hg19-tss-centered-10kb-10species	0.0149645	-0.346129
	6673	transfac_public-M00280	V$RFX1_01	RFX1	hg19-tss-centered-10kb-10species	0.0149645	-0.346129
	6674	flyfactorsurvey-br-PL_SOLEXA_FBgn0000210	FBgn0000210(br)		hg19-tss-centered-10kb-10species	0.0149626	-0.346604
	6675	encode-UW.Motif.0003	UW.Motif.0003	SMC3,RAD21,CTCF,CTCFL	hg19-tss-centered-10kb-10species	0.0149607	-0.347079
	6676	taipale-NSTAATTANN-MEOX2-DBD	NSTAATTANN-MEOX2-DBD	HOXC8,VAX2,VAX1,HOXC5,HOXC4,HOXB5,HOXC6,VENTX,TLX3,MEOX1,MEOX2,LHX1,LHX2,LHX3,LHX4,LHX5,LHX6,HOXA6,GSX2,LHX9,UNCX,LBX2,NKX1-2,HOXB6,DLX4,DLX5,LMX1B,DLX1,DLX2,DLX3,HOXB8,HOXD8,HOXD4,HOXB3,LBX1,EVX1,HOXD1,HOXB4,EVX2,BARX2,NKX1-1,HOXD3,NKX6-2,NKX6-3,NKX6-1,LMX1A,IRF6,EMX2,TLX1,TLX2,EMX1,HOXA7,LHX8,HOXA5,HOXA4,HOXA3,PDX1	hg19-tss-centered-10kb-10species	0.0149607	-0.347079
	6677	transfac_pro-M01013	V$IPF1_Q4_01	HOXC8,HOXC5,HOXC4,HOXB5,HOXC6,VENTX,HOXB6,DLX5,HOXB8,HOXD8,HOXD4,HOXB3,EVX1,HOXB4,EVX2,HOXD3,EMX2,EMX1,HOXA6,HOXA5,HOXA4,HOXA3,PDX1	hg19-tss-centered-10kb-10species	0.0149607	-0.347079
	6678	wgEncodeHaibTfbsSknshTaf1V0416101PkRep1.broadPeak.gz	TAF1/SK-N-SH/None	TAF1	hg19-tss-centered-10kb-chip-encode-taipale-inhouse	0.0167373	-0.347436
	6679	flyfactorsurvey-BH2_SOLEXA_FBgn0004854	FBgn0004854(B-H2)	HMX1,LHX1,HMX3,HMX2,BARHL2,BARHL1,ISL1,ISL2,UNCX,TLX1,TLX2,TLX3,NKX1-1,NKX1-2,PRRX2,LHX5	hg19-tss-centered-10kb-10species	0.014957	-0.348028
	6680	homer-M00449	C15/dmmpmm(Noyes_hd)/fly	HMX1,HOXC8,HMX3,HMX2,HOXC5,HOXC4,HOXC6,VENTX,EMX1,LHX1,LHX2,BSX,LHX5,LHX6,LHX8,LHX9,NKX1-2,HOXB3,RAX,RAX2,HOXB8,HOXD8,HOXD4,EVX1,HOXB6,HOXB4,EVX2,HOXB5,BARHL2,BARHL1,HOXD3,EMX2,TLX1,TLX2,TLX3,NKX1-1,HOXA6,HOXA5,HOXA4,HOXA3,PRRX2	hg19-tss-centered-10kb-10species	0.0149514	-0.349452
	6681	tfdimers-MD00273	MZF1_GATA	MZF1	hg19-tss-centered-10kb-10species	0.0149514	-0.349452
	6682	encode-UW.Motif.0676	UW.Motif.0676		hg19-tss-centered-10kb-10species	0.0149495	-0.349927
	6683	yetfasco-1042	YKL062W		hg19-tss-centered-10kb-10species	0.0149495	-0.349927
	6684	encode-UW.Motif.0164	UW.Motif.0164		hg19-tss-centered-10kb-10species	0.0149477	-0.350401
	6685	homer-M00402	vvl/dmmpmm(Bigfoot)/fly	POU3F3,POU3F2,POU3F1,POU3F4	hg19-tss-centered-10kb-10species	0.0149477	-0.350401
	6686	transfac_pro-M02325	I$ACHI_01		hg19-tss-centered-10kb-10species	0.0149477	-0.350401
	6687	jaspar-MA0349.1	OPI1		hg19-tss-centered-10kb-10species	0.0149458	-0.350876
	6688	taipale-ACNGTTAAACNG-MYBL1-DBD	ACNGTTAAACNG-MYBL1-DBD		hg19-tss-centered-10kb-10species	0.0149458	-0.350876
	6689	wgEncodeHaibTfbsMcf7Egr1V0422111PkRep2.broadPeak.gz	Egr-1/MCF-7/None	EGR1	hg19-tss-centered-10kb-chip-encode-taipale-inhouse	0.0167	-0.351296
	6690	flyfactorsurvey-H2.0_SOLEXA_FBgn0001170	FBgn0001170(H2.0)	HLX	hg19-tss-centered-10kb-10species	0.014944	-0.351351
	6691	homer-M00542	kni/dmmpmm(Noyes)/fly	RORC,RORB,RORA	hg19-tss-centered-10kb-10species	0.014944	-0.351351
	6692	yetfasco-865	YDR034C		hg19-tss-centered-10kb-10species	0.014944	-0.351351
	6693	wgEncodeHaibTfbsU87NrsfPcr2xPkRep1V2.broadPeak.gz	NRSF/U87/None	REST	hg19-tss-centered-10kb-chip-encode-taipale-inhouse	0.0166981	-0.351489
	6694	yetfasco-1835	YGR089W		hg19-tss-centered-10kb-10species	0.0149421	-0.351825
	6695	taipale-TCAAGGTCAWN-ESRRB-DBD	TCAAGGTCAWN-ESRRB-DBD	ESRRG,ESRRA,NR5A2,NR5A1,ESRRB	hg19-tss-centered-10kb-10species	0.0149402	-0.3523
	6696	yetfasco-893	YPR104C	JAZF1,FOXN4,FOXH1,FOXN1,FOXN2,FOXN3	hg19-tss-centered-10kb-10species	0.0149384	-0.352775
	6697	tfdimers-MD00194	NF-AT4_deltaEF1		hg19-tss-centered-10kb-10species	0.0149365	-0.353249
	6698	encode-UW.Motif.0454	UW.Motif.0454		hg19-tss-centered-10kb-10species	0.0149309	-0.354673
	6699	flyfactorsurvey-dsf_SANGER_5_FBgn0015381	FBgn0015381(dsf)		hg19-tss-centered-10kb-10species	0.0149309	-0.354673
	6700	homer-M00353	sna/dmmpmm(Bergman)/fly	TCF4,TCF3,MYF6,MYF5,SNAI2,SNAI3,SNAI1,MYOG,MYOD1	hg19-tss-centered-10kb-10species	0.0149309	-0.354673
	6701	tiffin-TIFDMEM0000036	TIFDMEM0000036		hg19-tss-centered-10kb-10species	0.0149309	-0.354673
	6702	yetfasco-1310	YPL089C	MEF2C,MEF2B,MEF2A,MEF2BNB-MEF2B,MEF2D	hg19-tss-centered-10kb-10species	0.0149309	-0.354673
	6703	yetfasco-1358	YFL021W	GATA6,GATA4,GATA5,GATA2,GATA3,GATA1	hg19-tss-centered-10kb-10species	0.0149309	-0.354673
	6704	flyfactorsurvey-Met_SANGER_5_FBgn0002723	FBgn0002723(Met)	ARNTL,MAX,ARNT,ARNTL2,MXI1	hg19-tss-centered-10kb-10species	0.014929	-0.355148
	6705	homer-M00482	Hmx/dmmpmm(Noyes_hd)/fly	HMX1,LHX1,HMX3,HMX2,HOXD8,BARHL2,BARHL1,RAX2,HOXB8,ISL1,ISL2,UNCX,TLX1,TLX2,TLX3,LHX8,LHX6,HOXC8,PRRX2,RAX,LHX5	hg19-tss-centered-10kb-10species	0.014929	-0.355148
	6706	iDMMPMM-BCD	bcd	GSC2,CRX,OTX1,OTX2,GSC,PITX3	hg19-tss-centered-10kb-10species	0.014929	-0.355148
	6707	tfdimers-MD00396	STAT6_C/EBPbeta	CEBPB,STAT6	hg19-tss-centered-10kb-10species	0.014929	-0.355148
	6708	tfdimers-MD00413	GR_C/EBP	CEBPB,NR3C1,CEBPG,CEBPE,CEBPD,CEBPA,FOXA1,FOXA3,FOXA2,PGR	hg19-tss-centered-10kb-10species	0.014929	-0.355148
	6709	yetfasco-1671	YDR277C		hg19-tss-centered-10kb-10species	0.014929	-0.355148
	6710	homer-M00514	Unpg/dmmpmm(Noyes_hd)/fly	HMX1,HOXC8,HMX3,ISX,VAX2,VAX1,BSX,ALX3,PRRX1,HOXC5,HOXC4,HOXB5,HOXC6,RHOXF2,HMX2,GSX1,TLX3,MNX1,NOBOX,GBX2,LHX2,LHX3,LHX4,LHX5,LHX6,HOXA6,GSX2,LHX9,ALX1,TLX1,UNCX,ALX4,EN1,EN2,HOXA4,HOXB6,VSX2,MSX1,LMX1B,RAX,DLX3,RAX2,HOXB8,HOXD8,LHX1,HOXD4,HOXB3,DRGX,EVX1,HOXD1,HOXB4,HOXD3,PAX4,PAX7,SHOX2,DLX5,PHOX2A,RHOXF2B,EVX2,LBX2,PRRX2,LMX1A,BARHL1,ESX1,ARX,EMX2,VENTX,TLX2,EMX1,NKX1-1,LHX8,HOXA5,NKX1-2,HOXA…	hg19-tss-centered-10kb-10species	0.0149272	-0.355623
	6711	taipale-ATCACGTGAT-MLX-full	ATCACGTGAT-MLX-full	HELT,TFEC,ARNT,BHLHE40,TFEB,USF2,USF1,TFE3,MITF,MLX,SREBF1,ATF3	hg19-tss-centered-10kb-10species	0.0149272	-0.355623
	6712	transfac_pro-M00489	V$NKX62_Q2	HOXC8,HOXC6,BARX2,HOXA3,MSX1,NKX6-2,DLX1,NKX6-3,POU2F1	hg19-tss-centered-10kb-10species	0.0149272	-0.355623
	6713	yetfasco-1233	YMR037C		hg19-tss-centered-10kb-10species	0.0149272	-0.355623
	6714	hdpi-PICK1	PICK1	PICK1	hg19-tss-centered-10kb-10species	0.0149253	-0.356097
	6715	homer-M01833	STE12(MacIsaac)/Yeast		hg19-tss-centered-10kb-10species	0.0149253	-0.356097
	6716	transfac_pro-M01710	F$AMT1_Q2		hg19-tss-centered-10kb-10species	0.0149253	-0.356097
	6717	yetfasco-1446	YBL103C		hg19-tss-centered-10kb-10species	0.0149253	-0.356097
	6718	factorbook-BHLHE40	BHLHE40	ARNTL,ARNT,BHLHE40,BHLHE41,USF2,MLXIPL,USF1,HES1,HES2,ARNTL2,HES4,ATF3	hg19-tss-centered-10kb-10species	0.0149216	-0.357047
	6719	stark-ACTNACCT	ACTNACCT		hg19-tss-centered-10kb-10species	0.0149197	-0.357521
	6720	tiffin-TIFDMEM0000002	TIFDMEM0000002		hg19-tss-centered-10kb-10species	0.0149197	-0.357521
	6721	homer-M01751	DAL81(MacIsaac)/Yeast		hg19-tss-centered-10kb-10species	0.0149178	-0.357996
	6722	transfac_pro-M00514	V$ATF4_Q2	CREB1,CREM,ATF5,ATF4,ATF7,ATF6,ATF1,ATF3,ATF2	hg19-tss-centered-10kb-10species	0.0149178	-0.357996
	6723	yetfasco-1220	YOL108C		hg19-tss-centered-10kb-10species	0.0149178	-0.357996
	6724	yetfasco-2136	YDR034C	FLI1	hg19-tss-centered-10kb-10species	0.0149178	-0.357996
	6725	homer-M01795	INO2(MacIsaac)/Yeast		hg19-tss-centered-10kb-10species	0.014916	-0.358471
	6726	taipale-AACAATNNNNAKTGTT-SOX21-DBD	AACAATNNNNAKTGTT-SOX21-DBD		hg19-tss-centered-10kb-10species	0.014916	-0.358471
	6727	taipale-NRCATTCCWN-TEAD4-DBD	NRCATTCCWN-TEAD4-DBD		hg19-tss-centered-10kb-10species	0.014916	-0.358471
	6728	transfac_pro-M01856	V$AML3_Q6	RUNX2,CBFB,RUNX1,RUNX3	hg19-tss-centered-10kb-10species	0.014916	-0.358471
	6729	jaspar-MA0304.1	GCR1		hg19-tss-centered-10kb-10species	0.0149141	-0.358945
	6730	taipale-GGGGTCAAAGGTCA-RXRB-DBD	GGGGTCAAAGGTCA-RXRB-DBD	NR2F6,HNF4A,HNF4G,NR2E3,NR2F1,RXRA,NR2F2,NR2C2,PPARG,PPARD,NR5A2,NR5A1,PPARA	hg19-tss-centered-10kb-10species	0.0149141	-0.358945
	6731	tfdimers-MD00278	CRX_IPF1		hg19-tss-centered-10kb-10species	0.0149122	-0.35942
	6732	hdpi-NFIB	NFIB	NFIB	hg19-tss-centered-10kb-10species	0.0149104	-0.359895
	6733	homer-M01769	ABF1(MacIsaac)/Yeast		hg19-tss-centered-10kb-10species	0.0149104	-0.359895
	6734	jaspar-CN0108.1	LM108		hg19-tss-centered-10kb-10species	0.0149104	-0.359895
	6735	wgEncodeHaibTfbsPfsk1NrsfPcr2xPkRep2.broadPeak.gz	NRSF/PFSK-1/None	REST	hg19-tss-centered-10kb-chip-encode-taipale-inhouse	0.016616	-0.35998
	6736	yetfasco-1684	YNL216W	JAZF1,FOXN4,FOXH1,FOXN1,FOXN2,FOXN3	hg19-tss-centered-10kb-10species	0.0149085	-0.360369
	6737	tfdimers-MD00364	WT1_CBF		hg19-tss-centered-10kb-10species	0.0149066	-0.360844
	6738	wgEncodeSydhTfbsMcf10aesCmycTam14hHvdPk.narrowPeak.gz	c-Myc/MCF10A-Er-Src/4OHTAM_1uM_4hr	MYC	hg19-tss-centered-10kb-chip-encode-taipale-inhouse	0.0166048	-0.361138
	6739	flyfactorsurvey-Hnf4_SANGER_5_FBgn0004914	FBgn0004914(Hnf4)	HNF4G,HNF4A,RXRA	hg19-tss-centered-10kb-10species	0.0149048	-0.361319
	6740	swissregulon-EHF.p2	EHF	ETV1,ETV5,ETV4,ETV7,ETV6,FLI1,EHF,ELK3,ELF1,GABPA,ELF3,ELF2,ELF5,ELF4	hg19-tss-centered-10kb-10species	0.0149048	-0.361319
	6741	taipale-NNCACGTGNN-MAX-DBD	NNCACGTGNN-MAX-DBD	MYCN,ARNT,MAX,USF2,USF1,MXI1,MYC	hg19-tss-centered-10kb-10species	0.0149048	-0.361319
	6742	transfac_pro-M02096	V$IPF1_Q5	HOXC8,HOXB8,HOXD8,EVX1,EVX2,HOXB6,VENTX,HOXC6,HOXA6,HOXA5,EMX1,ISL1,EMX2,PDX1,HOXB5,ISL2	hg19-tss-centered-10kb-10species	0.0149048	-0.361319
	6743	elemento-AACCGGTT	AACCGGTT		hg19-tss-centered-10kb-10species	0.0149029	-0.361793
	6744	tfdimers-MD00487	PXR,CAR,LXR,FXR_HOXA13	NR1I3,NR1H4,HOXA13,NR1I2	hg19-tss-centered-10kb-10species	0.0149029	-0.361793
	6745	GSM1208713_batch2_chrom1_LoVo_ATF5_PassedQC_peaks_hg19	ATF5/Lovo	ATF5	hg19-tss-centered-10kb-chip-encode-taipale-inhouse	0.0165973	-0.36191
	6746	wgEncodeHaibTfbsHepg2NrsfV0416101PkRep1.broadPeak.gz	NRSF/HepG2/None	REST	hg19-tss-centered-10kb-chip-encode-taipale-inhouse	0.0165899	-0.362681
	6747	elemento-CAGCTGG	CAGCTGG		hg19-tss-centered-10kb-10species	0.0148992	-0.362743
	6748	flyfactorsurvey-dm_Max_SANGER_10_FBgn0017578	FBgn0017578(Max)	MYCN,MAX,MNT,USF2,MXI1,MYC	hg19-tss-centered-10kb-10species	0.0148954	-0.363692
	6749	flyfactorsurvey-lola-PW_SOLEXA_FBgn0005630	FBgn0005630(lola)		hg19-tss-centered-10kb-10species	0.0148954	-0.363692
	6750	homer-M00441	ara/dmmpmm(Noyes_hd)/fly	IRX5,IRX4,IRX6,IRX1,IRX3,IRX2	hg19-tss-centered-10kb-10species	0.0148954	-0.363692
	6751	transfac_pro-M02339	I$EVE_01	HOXC8,HOXC5,HOXC4,HOXC6,VENTX,MEOX1,MEOX2,LHX2,LHX3,LHX4,LHX6,LHX8,LHX9,EVX2,GSX1,LBX2,NKX1-2,HOXB6,GSX2,HOXB8,HOXD8,HOXD4,HOXB3,LBX1,EVX1,HOXD1,HOXB4,HOXB5,BSX,HOXD3,EMX2,EMX1,NKX1-1,HOXA6,HOXA5,HOXA4,HOXA3,PDX1	hg19-tss-centered-10kb-10species	0.0148936	-0.364167
	6752	encode-UW.Motif.0450	UW.Motif.0450		hg19-tss-centered-10kb-10species	0.0148917	-0.364641
	6753	flyfactorsurvey-En_SOLEXA_FBgn0000577	FBgn0000577(en)	HOXC8,NOBOX,VAX1,ISL1,ISL2,HOXC5,HOXC4,HOXC6,LBX2,VENTX,TLX3,MEOX1,MEOX2,VAX2,LHX1,GBX1,LHX3,LHX4,LHX5,LHX6,LHX8,LHX9,EVX2,UNCX,HOXD1,EN1,HOXA4,PHOX2B,MSX1,DLX1,RAX,DLX3,RAX2,HOXB8,LBX1,HOXD8,GBX2,HOXD4,HOXB6,DRGX,LMX1A,LHX2,HOXB4,LMX1B,EVX1,OTP,PAX7,DLX5,PHOX2A,BSX,HOXB3,HOXB5,NKX6-2,NKX6-3,NKX6-1,DBX2,ARX,HOXD3,EMX2,TLX1,TLX2,EMX1,NKX1-1,HOXA6,HOXA5,NKX1-2,HOXA3,DLX2,PRRX1,PDX1,PRRX2	hg19-tss-centered-10kb-10species	0.0148917	-0.364641
	6754	tfdimers-MD00223	TEF-1_SOX9		hg19-tss-centered-10kb-10species	0.0148917	-0.364641
	6755	wgEncodeHaibTfbsU87NrsfPcr2xPkRep2V2.broadPeak.gz	NRSF/U87/None	REST	hg19-tss-centered-10kb-chip-encode-taipale-inhouse	0.0165619	-0.365576
	6756	taipale-NRTTAATNATTAACN-HNF1A-full	NRTTAATNATTAACN-HNF1A-full	HNF1B,HOXA4,HNF1A,RHOXF1	hg19-tss-centered-10kb-10species	0.014888	-0.365591
	6757	transfac_pro-M02108	V$NKX25_Q6	NKX2-5	hg19-tss-centered-10kb-10species	0.014888	-0.365591
	6758	transfac_pro-M02905	V$SOX18_04	SOX18,PAX7,SHOX2	hg19-tss-centered-10kb-10species	0.0148861	-0.366065
	6759	yetfasco-1850	YGL071W		hg19-tss-centered-10kb-10species	0.0148861	-0.366065
	6760	wgEncodeSydhTfbsK562JundIggrabPk.narrowPeak.gz	JunD/K562/None	JUND	hg19-tss-centered-10kb-chip-encode-taipale-inhouse	0.0165488	-0.366927
	6761	jaspar-CN0024.1	LM24	NEUROD1	hg19-tss-centered-10kb-10species	0.0148824	-0.367015
	6762	taipale-NTGAATNNNATTCAN-SOX2-DBD	NTGAATNNNATTCAN-SOX2-DBD		hg19-tss-centered-10kb-10species	0.0148824	-0.367015
	6763	transfac_pro-M00985	V$STRA13_01	ARNTL,HELT,ARNTL2,TFEC,TFEB,BHLHE40,MAX,ARNT,USF2,USF1,TFE3,MITF,MYC,SREBF1,ATF3	hg19-tss-centered-10kb-10species	0.0148824	-0.367015
	6764	wgEncodeHaibTfbsSknshNrsfPcr2xPkRep2.broadPeak.gz	NRSF/SK-N-SH/None	REST	hg19-tss-centered-10kb-chip-encode-taipale-inhouse	0.0165451	-0.367313
	6765	transfac_pro-M02816	V$TCF3_04	TCF4,TCF7,TCF3,SOX11,TCF7L1,TCF7L2,LEF1,SOX4	hg19-tss-centered-10kb-10species	0.0148805	-0.367489
	6766	yetfasco-2185	YIL101C		hg19-tss-centered-10kb-10species	0.0148805	-0.367489
	6767	flyfactorsurvey-vfl_SANGER_5_FBgn0259789	FBgn0259789(vfl)		hg19-tss-centered-10kb-10species	0.0148768	-0.368439
	6768	taipale-NCTCGTAAAAN-HOXD13-DBD	NCTCGTAAAAN-HOXD13-DBD	HOXC13,HOXA13	hg19-tss-centered-10kb-10species	0.0148768	-0.368439
	6769	taipale-NNYAATTANN-EN2-DBD	NNYAATTANN-EN2-DBD	HMX1,HOXA7,HMX3,HMX2,NOBOX,VAX1,ISL1,ISL2,VAX2,LHX1,GBX1,LHX5,LHX6,GSX2,LHX9,UNCX,OTP,MSX1,MSX2,DLX1,RAX,DLX3,RAX2,LHX2,GBX2,LBX2,DRGX,LMX1A,HOXD1,HOXD3,BARX2,PAX4,PAX7,SHOX2,DLX5,LMX1B,BARHL2,IRF6,BARHL1,ARX,EMX2,EMX1,NKX1-1,LHX8,HOXA5,NKX1-2,HOXA3,DLX2,PRRX1,PRRX2	hg19-tss-centered-10kb-10species	0.0148768	-0.368439
	6770	transfac_public-M00462	V$GATA6_01	GATA6,GATA4,GATA5,GATA2,GATA3,GATA1	hg19-tss-centered-10kb-10species	0.0148768	-0.368439
	6771	yetfasco-1939	YPR022C		hg19-tss-centered-10kb-10species	0.0148768	-0.368439
	6772	encode-UW.Motif.0046	UW.Motif.0046		hg19-tss-centered-10kb-10species	0.0148749	-0.368913
	6773	iDMMPMM-FKH	fkh	FOXA1,FOXA3,FOXA2	hg19-tss-centered-10kb-10species	0.0148749	-0.368913
	6774	taipale-NGCTGTWAN-Rhox11-DBD	NGCTGTWAN-Rhox11-DBD	RHOXF1	hg19-tss-centered-10kb-10species	0.014873	-0.369388
	6775	yetfasco-2166	YBL103C	POU3F3,TBPL2,TBPL1,MYB,SRF,MEF2BNB-MEF2B,POU3F2,TBP,POU3F4,SNAPC4,JAZF1,MEF2C,MEF2B,MEF2A,MEF2D,MYBL1,MYBL2,POU3F1	hg19-tss-centered-10kb-10species	0.014873	-0.369388
	6776	elemento-ACGACGA	ACGACGA		hg19-tss-centered-10kb-10species	0.0148693	-0.370337
	6777	elemento-TAATTGC	TAATTGC		hg19-tss-centered-10kb-10species	0.0148693	-0.370337
	6778	taipale-AAAAGTCAA-Nr2e1-DBD	AAAAGTCAA-Nr2e1-DBD		hg19-tss-centered-10kb-10species	0.0148693	-0.370337
	6779	tfdimers-MD00004	POU5F1_Nanog	NANOG,QSOX1,SMAD1,POU5F1B,POU5F1,SOX2	hg19-tss-centered-10kb-10species	0.0148693	-0.370337
	6780	tfdimers-MD00405	RUSH-1alpha_IRF-1		hg19-tss-centered-10kb-10species	0.0148693	-0.370337
	6781	encode-UW.Motif.0547	UW.Motif.0547		hg19-tss-centered-10kb-10species	0.0148674	-0.370812
	6782	tfdimers-MD00543	SOX10_Nkx3-2		hg19-tss-centered-10kb-10species	0.0148674	-0.370812
	6783	yetfasco-1412	YOL028C		hg19-tss-centered-10kb-10species	0.0148674	-0.370812
	6784	wgEncodeSydhTfbsGm12878Mxi1IggmusPk.narrowPeak.gz	Mxi1_(AF4185)/GM12878/None	MXI1	hg19-tss-centered-10kb-chip-encode-taipale-inhouse	0.0165078	-0.371173
	6785	tfdimers-MD00237	TEF-1_IPF1		hg19-tss-centered-10kb-10species	0.0148656	-0.371287
	6786	yetfasco-1058	YFR034C	MAX,MYC,MYCN,MXI1	hg19-tss-centered-10kb-10species	0.0148656	-0.371287
	6787	flyfactorsurvey-inv_SOLEXA_2_FBgn0001269	FBgn0001269(inv)	HMX1,HOXC8,HMX3,HMX2,NOBOX,VAX1,ISL1,ISL2,HOXC5,HOXC4,HOXB5,HOXC6,HOXA7,VENTX,TLX3,VAX2,LHX1,GBX1,LHX3,LHX4,LHX5,LHX6,HOXA6,GSX2,NKX6-2,EVX2,UNCX,EN1,EN2,HOXA4,HOXB6,LBX1,PHOX2B,MSX1,DLX1,RAX,DLX3,RAX2,HOXB8,LHX2,HOXD8,GBX2,HOXD4,HOXB3,DRGX,LMX1A,HOXD1,HOXB4,HOXD3,EVX1,OTP,PAX7,SHOX2,DLX5,PHOX2A,BSX,LMX1B,LBX2,NKX6-3,NKX6-1,BARHL2,BARHL1,ARX,EMX2,TLX1,TLX2,EMX1,NKX1-1,LHX8,HOXA5,NKX1-2,HOXA3,DLX2…	hg19-tss-centered-10kb-10species	0.0148637	-0.371761
	6788	transfac_public-M00356	P$BZIP910_01	CREB3L2,CREB3L1,ATF6B,ATF6,XBP1	hg19-tss-centered-10kb-10species	0.0148637	-0.371761
	6789	flyfactorsurvey-lola-PA_SANGER_5_FBgn0005630	FBgn0005630(lola)		hg19-tss-centered-10kb-10species	0.0148618	-0.372236
	6790	tfdimers-MD00115	E2F1_PXR		hg19-tss-centered-10kb-10species	0.01486	-0.372711
	6791	jaspar-MF0011.1	HMG_class		hg19-tss-centered-10kb-10species	0.0148581	-0.373185
	6792	wgEncodeSydhTfbsK562Gtf2f1ab28179IggrabPk.narrowPeak.gz	GTF2F1_(AB28179)/K562/None	GTF2F1	hg19-tss-centered-10kb-chip-encode-taipale-inhouse	0.0164872	-0.373295
	6793	wgEncodeSydhTfbsH1hescCmycIggrabPk.narrowPeak.gz	c-Myc/H1-hESC/None	MYC	hg19-tss-centered-10kb-chip-encode-taipale-inhouse	0.0164854	-0.373488
	6794	hdpi-SRP9	SRP9	SRP9	hg19-tss-centered-10kb-10species	0.0148562	-0.37366
	6795	tfdimers-MD00298	C/EBP_Freac-7	FOXJ1,FOXJ2,CEBPG,CEBPE,CEBPB,CEBPD,FOXD3,FOXA1,RRN3,FOXA3,FOXA2,FOXF1,FOXF2,FOXI1,FOXH1,FOXC1,CEBPA	hg19-tss-centered-10kb-10species	0.0148562	-0.37366
	6796	transfac_public-M00022	I$HB_01	ZNF513	hg19-tss-centered-10kb-10species	0.0148562	-0.37366
	6797	homer-M01811	TEC1(MacIsaac)/Yeast		hg19-tss-centered-10kb-10species	0.0148525	-0.374609
	6798	stark-AACWAATTR	AACWAATTR		hg19-tss-centered-10kb-10species	0.0148525	-0.374609
	6799	transfac_pro-M03564	V$SATB1_Q5_01	SATB1	hg19-tss-centered-10kb-10species	0.0148525	-0.374609
	6800	transfac_pro-M01728	V$EAR2_Q2	NR2F1,HNF4G,NR2F6,HNF4A,RXRA,NR2F2,NR2C2,PPARG,PPARD,NR2E3,PPARA	hg19-tss-centered-10kb-10species	0.0148506	-0.375084
	6801	transfac_pro-M00959	V$ER_Q6_02	ESR2,ESR1	hg19-tss-centered-10kb-10species	0.0148488	-0.375559
	6802	taipale-AGGTGTGA-TBX15-DBD	AGGTGTGA-TBX15-DBD	TBX21,TBX22,EOMES,TBX6,T,TBX5,TBX15	hg19-tss-centered-10kb-10species	0.0148469	-0.376033
	6803	transfac_pro-M00973	V$E2A_Q6	TCF4,MYF6,MYF5,TCF3,ARID5B,ASCL1,TCF12,SNAI2,SNAI3,SNAI1,MYOG,MYOD1	hg19-tss-centered-10kb-10species	0.0148469	-0.376033
	6804	yetfasco-2203	YPR104C	FOXN4,FOXH1,FOXN1,FOXN2,FOXN3	hg19-tss-centered-10kb-10species	0.0148469	-0.376033
	6805	taipale-NNCAMTTAANN-HMX3-DBD	NNCAMTTAANN-HMX3-DBD	HMX1,HMX3,HMX2,BARHL2,BARHL1,ISL1,ISL2,PRRX2	hg19-tss-centered-10kb-10species	0.014845	-0.376508
	6806	transfac_public-M00108	V$NRF2_01	ETV1,FEV,ETV3,GABPB1,ETV5,ETV4,ETV7,ETV6,ELK1,FLI1,ELF4,ETS2,ELK3,ERF,ERG,ELK4,ETV2,ELF1,GABPA,ELF2,ETS1	hg19-tss-centered-10kb-10species	0.014845	-0.376508
	6807	wgEncodeHaibTfbsGm12878Irf4sc6059Pcr1xPkRep2.broadPeak.gz	IRF4_(SC-6059)/GM12878/None	IRF4	hg19-tss-centered-10kb-chip-encode-taipale-inhouse	0.0164536	-0.376769
	6808	jaspar-PF0105.1	ACTWSNACTNY		hg19-tss-centered-10kb-10species	0.0148432	-0.376983
	6809	yetfasco-1689	YBR049C		hg19-tss-centered-10kb-10species	0.0148432	-0.376983
	6810	flyfactorsurvey-tin_FlyReg_FBgn0004110	FBgn0004110(tin)	NKX2-2,NKX2-3,NKX2-6,NKX2-5	hg19-tss-centered-10kb-10species	0.0148413	-0.377457
	6811	homer-M00132	Nur77(NR)/K562-NR4A1-ChIP-Seq(GSE31363)/Homer	RARA,NR0B1,NR4A1,NR2F1,RXRA,NR2F2	hg19-tss-centered-10kb-10species	0.0148413	-0.377457
	6812	homer-M00650	tin/dmmpmm(Pollard)/fly	NKX2-2,NKX2-3,NKX2-6,NKX2-5	hg19-tss-centered-10kb-10species	0.0148413	-0.377457
	6813	stark-BYAATTARH	BYAATTARH	HMX1,HOXC8,HMX3,HMX2,NOBOX,VAX1,BSX,ISL1,ISL2,HOXC5,RHOXF2,HOXB5,HOXC6,VENTX,ALX3,VAX2,LHX1,LHX2,LHX3,LHX4,LHX5,LHX6,HOXA6,GSX2,LHX9,ALX1,UNCX,ALX4,HOXD4,EN2,HOXA4,VSX1,OTP,PHOX2B,MSX1,MSX2,NKX6-1,RAX,DLX3,HOXC4,RAX2,HOXB8,HOXD8,GBX2,LBX2,EVX1,DRGX,LMX1A,HOXD1,HOXB4,HOXD3,BARX2,PAX4,PAX7,SHOX2,DLX5,PHOX2A,RHOXF2B,HOXB3,LMX1B,NKX6-2,NKX6-3,BARHL2,IRF6,BARHL1,ESX1,ARX,GBX1,EMX2,EVX2,EMX1,NKX1-1,LHX…	hg19-tss-centered-10kb-10species	0.0148413	-0.377457
	6814	stark-TAAATAG	TAAATAG		hg19-tss-centered-10kb-10species	0.0148413	-0.377457
	6815	taipale-YTAATTAN-Uncx-DBD	YTAATTAN-Uncx-DBD	NOBOX,VAX1,PRRX1,RHOXF2,VENTX,ALX3,VAX2,LHX1,LHX2,LHX3,LHX4,LHX5,LHX6,GSX2,LHX9,ALX1,ALX4,EN1,EN2,NKX1-2,VSX1,MSX1,RAX,RAX2,GBX2,LBX2,LMX1A,DRGX,EVX1,HOXD1,EVX2,BARX2,PAX4,PAX7,PAX6,PHOX2A,RHOXF2B,LMX1B,ARX,GBX1,EMX2,EMX1,NKX1-1,LHX8,SHOX2,HOXA3,OTP,PDX1,PRRX2,POU2F1	hg19-tss-centered-10kb-10species	0.0148413	-0.377457
	6816	yetfasco-2202	YJR060W	HELT,MYF5,MYF6,HAND1,HAND2,MITF,MXD4,MYOG,MXD1,ARNTL,MYCN,ARNTL2,MYOD1,MXD3,BHLHE40,BHLHE41,TFEB,USF2,USF1,TFE3,MYC,TCF12,TCF4,TAL1,TCF3,TAL2,ASCL1,TFEC,ARID5B,ARNT,MXI1,NHLH1,MAX,ATF3	hg19-tss-centered-10kb-10species	0.0148413	-0.377457
	6817	wgEncodeHaibTfbsH1hescHdac2sc6296V0416102PkRep1.broadPeak.gz	HDAC2_(SC-6296)/H1-hESC/None	HDAC2	hg19-tss-centered-10kb-chip-encode-taipale-inhouse	0.0164443	-0.377734
	6818	homer-M00301	MF0011.1_HMG_class/Jaspar	SRY	hg19-tss-centered-10kb-10species	0.0148394	-0.377932
	6819	tfdimers-MD00304	GR_ETS2		hg19-tss-centered-10kb-10species	0.0148394	-0.377932
	6820	transfac_pro-M01081	V$ZEC_01	ZNF628	hg19-tss-centered-10kb-10species	0.0148394	-0.377932
	6821	wgEncodeHaibTfbsPanc1NrsfPcr2xPkRep2.broadPeak.gz	NRSF/PANC-1/None	REST	hg19-tss-centered-10kb-chip-encode-taipale-inhouse	0.0164406	-0.37812
	6822	elemento-AAGGACG	AAGGACG		hg19-tss-centered-10kb-10species	0.0148376	-0.378407
	6823	jaspar-CN0062.1	LM62		hg19-tss-centered-10kb-10species	0.0148376	-0.378407
	6824	transfac_pro-M03185	P$BBM_01		hg19-tss-centered-10kb-10species	0.0148376	-0.378407
	6825	tfdimers-MD00213	HOXB13_TBP	HOXD13,HOXD10,HOXB13	hg19-tss-centered-10kb-10species	0.0148357	-0.378881
	6826	factorbook-UA6	UA6		hg19-tss-centered-10kb-10species	0.0148338	-0.379356
	6827	taipale-TGCCACGTGGCA-CREB3L1-full	TGCCACGTGGCA-CREB3L1-full	MNT	hg19-tss-centered-10kb-10species	0.0148338	-0.379356
	6828	transfac_pro-M01087	I$CEBP_Q6	CEBPB,CEBPA,CEBPG,CEBPE,CEBPD	hg19-tss-centered-10kb-10species	0.0148338	-0.379356
	6829	encode-UW.Motif.0095	UW.Motif.0095		hg19-tss-centered-10kb-10species	0.0148301	-0.380305
	6830	encode-UW.Motif.0140	UW.Motif.0140		hg19-tss-centered-10kb-10species	0.0148301	-0.380305
	6831	homer-M00433	zen/dmmpmm(Down)/fly	HOXD4,HOXB3,HOXC5,HOXC4,HOXB4,HOXD3,HOXA4,HOXA3	hg19-tss-centered-10kb-10species	0.0148301	-0.380305
	6832	yetfasco-1748	YML099C	TGIF2LY,TGIF2LX,TGIF2,TGIF1	hg19-tss-centered-10kb-10species	0.0148301	-0.380305
	6833	encode-UW.Motif.0324	UW.Motif.0324		hg19-tss-centered-10kb-10species	0.0148283	-0.38078
	6834	hdpi-PRNP	PRNP	PRNP	hg19-tss-centered-10kb-10species	0.0148283	-0.38078
	6835	homer-M01550	THI2/THI2_Thi-/[](Harbison)/Yeast		hg19-tss-centered-10kb-10species	0.0148283	-0.38078
	6836	encode-UW.Motif.0247	UW.Motif.0247		hg19-tss-centered-10kb-10species	0.0148245	-0.381729
	6837	yetfasco-1514	YLR131C		hg19-tss-centered-10kb-10species	0.0148245	-0.381729
	6838	yetfasco-1740	MATA1		hg19-tss-centered-10kb-10species	0.0148245	-0.381729
	6839	homer-M01819	YAP1(MacIsaac)/Yeast		hg19-tss-centered-10kb-10species	0.0148227	-0.382204
	6840	stark-GTCNNNNGACA	GTCNNNNGACA		hg19-tss-centered-10kb-10species	0.0148227	-0.382204
	6841	taipale-ATGAATAACATTCAT-SOX15-full	ATGAATAACATTCAT-SOX15-full		hg19-tss-centered-10kb-10species	0.0148227	-0.382204
	6842	taipale-NTGACAGN-MEIS3-DBD	NTGACAGN-MEIS3-DBD	PKNOX1,MEIS3,PBX3,TGIF2LY,TGIF2LX,TGIF1,TGIF2,PKNOX2	hg19-tss-centered-10kb-10species	0.0148227	-0.382204
	6843	elemento-ATGTCCAC	ATGTCCAC		hg19-tss-centered-10kb-10species	0.0148208	-0.382679
	6844	homer-M00583	ttk/dmmpmm(Papatsenko)/fly		hg19-tss-centered-10kb-10species	0.0148208	-0.382679
	6845	transfac_pro-M01055	P$NAC691_01		hg19-tss-centered-10kb-10species	0.0148208	-0.382679
	6846	encode-UW.Motif.0392	UW.Motif.0392		hg19-tss-centered-10kb-10species	0.0148189	-0.383153
	6847	homer-M00560	brk/dmmpmm(Papatsenko)/fly		hg19-tss-centered-10kb-10species	0.0148189	-0.383153
	6848	flyfactorsurvey-Bcd_SOLEXA_FBgn0000166	FBgn0000166(bcd)	GSC2,CRX,OTX1,OTX2,GSC,PITX2,PITX3,PITX1	hg19-tss-centered-10kb-10species	0.0148171	-0.383628
	6849	yetfasco-1663	YMR037C		hg19-tss-centered-10kb-10species	0.0148171	-0.383628
	6850	wgEncodeSydhTfbsK562Xrcc4StdPk.narrowPeak.gz	XRCC4/K562/None	XRCC4	hg19-tss-centered-10kb-chip-encode-taipale-inhouse	0.0163809	-0.384295
	6851	encode-UW.Motif.0400	UW.Motif.0400		hg19-tss-centered-10kb-10species	0.0148133	-0.384577
	6852	flyfactorsurvey-Vis_Cell_FBgn0033748	FBgn0033748(vis)	TGIF2LY,TGIF2LX,TGIF2,TGIF1	hg19-tss-centered-10kb-10species	0.0148133	-0.384577
	6853	tfdimers-MD00517	NF-AT2_Oct-4	(POU5F1)	hg19-tss-centered-10kb-10species	0.0148133	-0.384577
	6854	homer-M01530	SIG1/SIG1_H2O2Hi/[](Harbison)/Yeast	CNOT4	hg19-tss-centered-10kb-10species	0.0148115	-0.385052
	6855	stark-HAATTAYGCRH	HAATTAYGCRH		hg19-tss-centered-10kb-10species	0.0148115	-0.385052
	6856	transfac_pro-M01358	V$SIX3_01	SIX6,SIX1,SIX2,SIX3	hg19-tss-centered-10kb-10species	0.0148115	-0.385052
	6857	transfac_pro-M02117	V$STAT4_Q5	STAT5B,STAT5A,STAT4,STAT3,STAT1	hg19-tss-centered-10kb-10species	0.0148115	-0.385052
	6858	transfac_pro-M03581	V$TBP_Q6_01	TBP	hg19-tss-centered-10kb-10species	0.0148096	-0.385527
	6859	wgEncodeHaibTfbsK562Ctcflsc98982V0416101PkRep2.broadPeak.gz	CTCFL_(SC-98982)/K562/None	CTCFL	hg19-tss-centered-10kb-chip-encode-taipale-inhouse	0.0163659	-0.385839
	6860	transfac_pro-M02869	V$HOXA3_07	HOXA3	hg19-tss-centered-10kb-10species	0.0148077	-0.386001
	6861	tfdimers-MD00317	c-Myb_p53	decamer	hg19-tss-centered-10kb-10species	0.0148059	-0.386476
	6862	yetfasco-2045	YOR298C-A		hg19-tss-centered-10kb-10species	0.0148059	-0.386476
	6863	hdpi-PCK2	PCK2	PCK2	hg19-tss-centered-10kb-10species	0.014804	-0.386951
	6864	taipale-RRGGTCATGACCYY-RXRA-DBD	RRGGTCATGACCYY-RXRA-DBD		hg19-tss-centered-10kb-10species	0.0148021	-0.387425
	6865	transfac_pro-M00802	V$PIT1_Q6	POU1F1	hg19-tss-centered-10kb-10species	0.0148021	-0.387425
	6866	transfac_pro-M01100	V$LRF_Q2	ZBTB7A	hg19-tss-centered-10kb-10species	0.0148021	-0.387425
	6867	transfac_pro-M03550	P$GT1_Q6_02		hg19-tss-centered-10kb-10species	0.0148021	-0.387425
	6868	yetfasco-1613	YNL314W		hg19-tss-centered-10kb-10species	0.0148021	-0.387425
	6869	yetfasco-401	YPL049C		hg19-tss-centered-10kb-10species	0.0148021	-0.387425
	6870	stark-TGTCAMNTGCA	TGTCAMNTGCA		hg19-tss-centered-10kb-10species	0.0148003	-0.3879
	6871	yetfasco-1606	YJR060W	NHLH1,MYF6,HAND1,HAND2,MITF,MXD4,MYOG,MXD1,MYF5,MYCN,MYOD1,MXD3,BHLHE40,BHLHE41,TFEB,USF2,USF1,TFE3,MYC,TCF4,ASCL1,TAL1,TCF3,TAL2,TCF12,MLX,ARID5B,ARNT,MXI1,SREBF1,MAX,ATF3	hg19-tss-centered-10kb-10species	0.0148003	-0.3879
	6872	selexconsensus-ap	ap	LHX9,LHX2	hg19-tss-centered-10kb-10species	0.0147984	-0.388375
	6873	taipale-NTCAAGGTCAN-ESRRA-DBD	NTCAAGGTCAN-ESRRA-DBD	ESRRG,ESRRA,NR6A1,ESRRB,NR0B1,PPARGC1A,NR5A2,NR5A1	hg19-tss-centered-10kb-10species	0.0147984	-0.388375
	6874	yetfasco-1425	YPR008W		hg19-tss-centered-10kb-10species	0.0147984	-0.388375
	6875	wgEncodeHaibTfbsGm12878Zeb1sc25388V0416102PkRep1.broadPeak.gz	ZEB1_(SC-25388)/GM12878/None	ZEB1	hg19-tss-centered-10kb-chip-encode-taipale-inhouse	0.0163398	-0.388541
	6876	encode-UW.Motif.0522	UW.Motif.0522		hg19-tss-centered-10kb-10species	0.0147965	-0.388849
	6877	taipale-NNCNGTTNNNACNGTTN-MYBL1-DBD	NNCNGTTNNNACNGTTN-MYBL1-DBD		hg19-tss-centered-10kb-10species	0.0147965	-0.388849
	6878	yetfasco-111	YCR065W	FOXJ1,FOXD3,FOXO3,RRN3,FOXO1,FOXM1,FOXO6,FOXF2,FOXO4,FOXH1,FOXF1	hg19-tss-centered-10kb-10species	0.0147947	-0.389324
	6879	GSM1208671_batch1_chrom1_LoVo_RFX2_PassedQC_peaks_hg19	RFX2/Lovo	RFX2	hg19-tss-centered-10kb-chip-encode-taipale-inhouse	0.0163286	-0.389699
	6880	tfdimers-MD00158	DBP_Kid3		hg19-tss-centered-10kb-10species	0.0147928	-0.389799
	6881	GSM1208611_batch1_chrom1_LoVo_USF2_PassedQC_peaks_hg19	USF2/Lovo	USF2	hg19-tss-centered-10kb-chip-encode-taipale-inhouse	0.0163268	-0.389892
	6882	taipale-ATGAATTGCAGTCAT-SOX10-full	ATGAATTGCAGTCAT-SOX10-full		hg19-tss-centered-10kb-10species	0.0147909	-0.390274
	6883	yetfasco-643	YOR344C	HELT,TFEC,TFEB,BHLHE40,MAX,ARNT,USF2,SREBF1,TFE3,MITF,USF1,MYC,MLX,ATF3	hg19-tss-centered-10kb-10species	0.0147909	-0.390274
	6884	jaspar-POL005.1	DPE		hg19-tss-centered-10kb-10species	0.0147891	-0.390748
	6885	tfdimers-MD00427	CDP		hg19-tss-centered-10kb-10species	0.0147891	-0.390748
	6886	transfac_pro-M00368	P$CPRF_Q2	MYCN,CLOCK,MAX,MNT,NPAS2,USF2,USF1,MYC	hg19-tss-centered-10kb-10species	0.0147891	-0.390748
	6887	wgEncodeSydhTfbsK562CmycIggrabPk.narrowPeak.gz	c-Myc/K562/None	MYC	hg19-tss-centered-10kb-chip-encode-taipale-inhouse	0.0163174	-0.390857
	6888	flyfactorsurvey-jigr1_SANGER_5_FBgn0039350	FBgn0039350(jigr1)		hg19-tss-centered-10kb-10species	0.0147872	-0.391223
	6889	wgEncodeHaibTfbsHepg2Tcf12Pcr1xPkRep2.broadPeak.gz	TCF12/HepG2/None	TCF12	hg19-tss-centered-10kb-chip-encode-taipale-inhouse	0.0163118	-0.391436
	6890	hdpi-HIST2H2BE	HIST2H2BE	HIST2H2BE	hg19-tss-centered-10kb-10species	0.0147853	-0.391698
	6891	hdpi-SSX2	SSX2	SSX2	hg19-tss-centered-10kb-10species	0.0147853	-0.391698
	6892	transfac_pro-M01815	P$TGA3_Q2		hg19-tss-centered-10kb-10species	0.0147853	-0.391698
	6893	wgEncodeHaibTfbsK562Usf1V0416101PkRep2.broadPeak.gz	USF-1/K562/None	USF1	hg19-tss-centered-10kb-chip-encode-taipale-inhouse	0.0163062	-0.392015
	6894	elemento-TCCTCGC	TCCTCGC		hg19-tss-centered-10kb-10species	0.0147835	-0.392172
	6895	jaspar-MA0376.1	RTG3	ARNT,BHLHE40,MAX,USF1,MXI1,MYC	hg19-tss-centered-10kb-10species	0.0147835	-0.392172
	6896	jaspar-PF0041.1	TGACAGNY	MEIS3	hg19-tss-centered-10kb-10species	0.0147835	-0.392172
	6897	tfdimers-MD00485	NMYC_NMYC		hg19-tss-centered-10kb-10species	0.0147835	-0.392172
	6898	transfac_pro-M01843	V$DEC2_Q2	BHLHE40,BHLHE41,USF1	hg19-tss-centered-10kb-10species	0.0147835	-0.392172
	6899	transfac_pro-M02837	V$ZIC3_04	ZIC1,ZIC2,ZIC3,ZNF423	hg19-tss-centered-10kb-10species	0.0147835	-0.392172
	6900	yetfasco-1361	YEL009C		hg19-tss-centered-10kb-10species	0.0147835	-0.392172
	6901	GSM1208789_batch2_chrom1_LoVo_RBCK1_PassedQC_peaks_hg19	RBCK1/Lovo	RBCK1	hg19-tss-centered-10kb-chip-encode-taipale-inhouse	0.0163025	-0.392401
	6902	elemento-CGTGGCCA	CGTGGCCA		hg19-tss-centered-10kb-10species	0.0147816	-0.392647
	6903	jaspar-PF0099.1	ATCMNTCCGY		hg19-tss-centered-10kb-10species	0.0147816	-0.392647
	6904	tfdimers-MD00316	TCF-3_TCF-3	NANOG,TCF7L1,SMAD1,POU5F1B,POU5F1,SOX2	hg19-tss-centered-10kb-10species	0.0147816	-0.392647
	6905	transfac_public-M00027	F$ABAA_01		hg19-tss-centered-10kb-10species	0.0147816	-0.392647
	6906	wgEncodeSydhTfbsGm12878Mazab85725IggmusPk.narrowPeak.gz	MAZ_(ab85725)/GM12878/None	MAZ	hg19-tss-centered-10kb-chip-encode-taipale-inhouse	0.0162969	-0.39298
	6907	taipale-GTCGTAAAN-Hoxd9-DBD	GTCGTAAAN-Hoxd9-DBD	HOXC11,HOXC10,HOXD12,HOXA11,HOXD11	hg19-tss-centered-10kb-10species	0.0147797	-0.393122
	6908	yetfasco-710	YMR053C		hg19-tss-centered-10kb-10species	0.0147797	-0.393122
	6909	transfac_pro-M01379	V$HNF1_02	HNF1B,HNF1A,VAX1	hg19-tss-centered-10kb-10species	0.0147779	-0.393596
	6910	yetfasco-517	YBR033W		hg19-tss-centered-10kb-10species	0.0147779	-0.393596
	6911	homer-M00463	CG4136/dmmpmm(Noyes_hd)/fly	HMX1,HOXC8,HMX3,HMX2,VAX2,VAX1,ALX3,PRRX1,ISL2,HOXC5,HOXC4,HOXB5,HOXC6,HOXA7,VENTX,HHEX,NKX1-2,TLX3,RHOXF2,MEOX1,MEOX2,NOBOX,GBX2,GBX1,LHX3,LHX4,LHX5,LHX6,HOXA6,GSX2,LHX9,ALX1,GSX1,UNCX,ALX4,EN1,EN2,HOXA4,VSX1,HOXB6,LBX1,ISL1,MSX1,LMX1B,RAX,DLX3,RAX2,HOXB8,LHX2,HOXD8,LHX1,HOXD4,HOXB3,DRGX,EVX1,HOXD1,HOXB4,HOXD3,PAX4,PAX7,SHOX2,HOXB7,DLX5,RHOXF2B,EVX2,LBX2,LMX1A,ESX1,ARX,EMX2,TLX1,TLX2,EMX1,NKX1-1…	hg19-tss-centered-10kb-10species	0.014776	-0.394071
	6912	homer-M00608	Dfd/dmmpmm(Pollard)/fly	HOXC8,ISL1,ISL2,HOXC5,HOXC4,HOXC6,TLX3,MEOX1,MEOX2,GBX2,LHX2,BSX,LHX6,LHX8,LHX9,NKX1-2,DLX5,DLX2,DLX3,HOXB8,HOXD8,HOXD4,HOXB3,DRGX,HOXB6,HOXD1,HOXB4,HOXD3,PRRX1,HOXB5,PRRX2,EMX2,TLX1,TLX2,EMX1,NKX1-1,HOXA6,HOXA5,HOXA4,HOXA3,OTP,PDX1,GBX1	hg19-tss-centered-10kb-10species	0.014776	-0.394071
	6913	taipale-NGTCACGCWTSRNTGNNY-PAX5-DBD	NGTCACGCWTSRNTGNNY-PAX5-DBD	PAX5,PAX4,PAX6,PAX1,PAX2,PAX9,PAX8	hg19-tss-centered-10kb-10species	0.014776	-0.394071
	6914	taipale-TAAYYNAATTA-PROP1-full	TAAYYNAATTA-PROP1-full		hg19-tss-centered-10kb-10species	0.014776	-0.394071
	6915	homer-M01829	SWI6(MacIsaac)/Yeast		hg19-tss-centered-10kb-10species	0.0147741	-0.394546
	6916	tfdimers-MD00127	AP-2		hg19-tss-centered-10kb-10species	0.0147741	-0.394546
	6917	homer-M00649	Su(H)/dmmpmm(Pollard)/fly	RBPJ,RBPJL	hg19-tss-centered-10kb-10species	0.0147723	-0.39502
	6918	jaspar-CN0089.1	LM89		hg19-tss-centered-10kb-10species	0.0147704	-0.395495
	6919	tfdimers-MD00277	HOXD10_HOXD10	HOXB9,CDX1,CDX2,HOXD13,HOXD10,HOXA10,HOXA9,HOXB13	hg19-tss-centered-10kb-10species	0.0147704	-0.395495
	6920	transfac_pro-M01275	V$IPF1_Q6	PDX1,HOXB8,HOXD8,HOXC8	hg19-tss-centered-10kb-10species	0.0147704	-0.395495
	6921	flyfactorsurvey-dei_da_SANGER_5_FBgn0008649	FBgn0008649	TCF4,TAL1,TCF3,BHLHE22,BHLHE23,SCRT1,SCRT2,ATOH8	hg19-tss-centered-10kb-10species	0.0147685	-0.39597
	6922	homer-M00428	tll/dmmpmm(Down)/fly		hg19-tss-centered-10kb-10species	0.0147685	-0.39597
	6923	wgEncodeHaibTfbsSknshSin3ak20V0416101PkRep2.broadPeak.gz	Sin3Ak-20/SK-N-SH/None	SIN3A	hg19-tss-centered-10kb-chip-encode-taipale-inhouse	0.016267	-0.396067
	6924	hdpi-PDCD11	PDCD11	PDCD11,KDM5A	hg19-tss-centered-10kb-10species	0.0147667	-0.396444
	6925	swissregulon-bHLH_family.p2	ARNTL,MITF,MXI1,TFE3,CLOCK,OLIG2,MXD4,HEY2,HEY1,HEYL,MLXIPL,HES6,MXD3,ARNTL2,ID1,MNT,OLIG1,NPAS2	MYCN,ARNT,MAX,MNT,USF2,USF1,MXI1,MYC	hg19-tss-centered-10kb-10species	0.0147667	-0.396444
	6926	tfdimers-MD00321	FLI1_ING4	RUNX1	hg19-tss-centered-10kb-10species	0.0147667	-0.396444
	6927	tiffin-TIFDMEM0000053	TIFDMEM0000053		hg19-tss-centered-10kb-10species	0.0147667	-0.396444
	6928	yetfasco-1360	YFL021W	GATA6,GATA4,GATA5,GATA2,GATA3,GATA1	hg19-tss-centered-10kb-10species	0.0147648	-0.396919
	6929	yetfasco-1386	YBL005W		hg19-tss-centered-10kb-10species	0.0147648	-0.396919
	6930	homer-M00267	RLR1?/SacCer-Promoters/Homer	MYB,RFX8,RFX4,RFX6,RFX1,RFX2,RFX3,SNAPC4,MYBL1,MYBL2	hg19-tss-centered-10kb-10species	0.0147629	-0.397394
	6931	jaspar-CN0110.1	LM110		hg19-tss-centered-10kb-10species	0.0147629	-0.397394
	6932	transfac_pro-M00697	P$HBP1B_Q6	E4F1	hg19-tss-centered-10kb-10species	0.0147629	-0.397394
	6933	yetfasco-1126	YHR006W		hg19-tss-centered-10kb-10species	0.0147629	-0.397394
	6934	flyfactorsurvey-Repo_Cell_FBgn0011701	FBgn0011701(repo)	HOXC8,VAX1,HOXB5,HOXC6,HOXA7,VENTX,EMX1,LHX1,GBX1,LHX3,LHX4,LHX5,LHX6,LHX8,EVX2,UNCX,RAX,RAX2,HOXB8,HOXD8,GBX2,LBX2,HOXB6,DRGX,LMX1A,HOXD1,HOXD3,EVX1,OTP,PAX7,SHOX2,LMX1B,NKX6-2,NKX6-3,NKX6-1,ARX,EMX2,TLX1,TLX2,TLX3,NKX1-1,HOXA6,HOXA5,NKX1-2,PRRX1,PDX1,PRRX2	hg19-tss-centered-10kb-10species	0.0147611	-0.397868
	6935	transfac_public-M00170	F$HSF_05	HSF1,HSF2,HSF4	hg19-tss-centered-10kb-10species	0.0147611	-0.397868
	6936	encode-UW.Motif.0103	UW.Motif.0103		hg19-tss-centered-10kb-10species	0.0147573	-0.398818
	6937	jaspar-CN0209.1	LM209		hg19-tss-centered-10kb-10species	0.0147573	-0.398818
	6938	wgEncodeHaibTfbsPanc1Sin3ak20V0416101PkRep2.broadPeak.gz	Sin3Ak-20/PANC-1/None	SIN3A	hg19-tss-centered-10kb-chip-encode-taipale-inhouse	0.0162372	-0.399155
	6939	wgEncodeSydhTfbsGm12878JundStdPk.narrowPeak.gz	JunD/GM12878/None	JUND	hg19-tss-centered-10kb-chip-encode-taipale-inhouse	0.0162316	-0.399734
	6940	flyfactorsurvey-Side_SANGER_5_FBgn0032741	FBgn0032741(Side)	HES1,HES2,HES4	hg19-tss-centered-10kb-10species	0.0147536	-0.399767
	6941	transfac_public-M00003	V$VMYB_01		hg19-tss-centered-10kb-10species	0.0147536	-0.399767
	6942	yetfasco-667	YLR131C		hg19-tss-centered-10kb-10species	0.0147536	-0.399767
	6943	wgEncodeHaibTfbsGm12878Pbx3Pcr1xPkRep1.broadPeak.gz	Pbx3/GM12878/None	PBX3	hg19-tss-centered-10kb-chip-encode-taipale-inhouse	0.0162278	-0.40012
	6944	elemento-ATAATTA	ATAATTA		hg19-tss-centered-10kb-10species	0.0147517	-0.400242
	6945	jaspar-MA0163.1	PLAG1	PLAG1	hg19-tss-centered-10kb-10species	0.0147517	-0.400242
	6946	taipale-NCCCCCCCAC-Zfp740-DBD	NCCCCCCCAC-Zfp740-DBD	ZNF740	hg19-tss-centered-10kb-10species	0.0147517	-0.400242
	6947	homer-M00181	Srebp1a(HLH)/HepG2-Srebp1a-ChIP-Seq/Homer	SREBF2,SREBF1	hg19-tss-centered-10kb-10species	0.0147499	-0.400716
	6948	yetfasco-1341	YKR099W	MYBL1,MYB,MYBL2,SNAPC4	hg19-tss-centered-10kb-10species	0.014748	-0.401191
	6949	transfac_public-M00278	V$LMO2COM_02	LMO2	hg19-tss-centered-10kb-10species	0.0147424	-0.402615
	6950	yetfasco-2027	YHR084W		hg19-tss-centered-10kb-10species	0.0147405	-0.40309
	6951	encode-UW.Motif.0360	UW.Motif.0360	USF1,ATOH1	hg19-tss-centered-10kb-10species	0.0147387	-0.403564
	6952	homer-M00686	Mad/dmmpmm(SeSiMCMC)/fly		hg19-tss-centered-10kb-10species	0.0147368	-0.404039
	6953	transfac_pro-M03124	N$HLH2LIN32_01	TCF4,NEUROD1,TAL1,MYF5,TCF3,ASCL2,HES4,MYF6,ATOH1,TCF12,HES1,HES2,MYOG,MYOD1	hg19-tss-centered-10kb-10species	0.0147368	-0.404039
	6954	tfdimers-MD00597	TTF-1		hg19-tss-centered-10kb-10species	0.0147349	-0.404514
	6955	yetfasco-2084	YNL167C		hg19-tss-centered-10kb-10species	0.0147349	-0.404514
	6956	transfac_pro-M02327	I$AP_01	HOXC8,NOBOX,RAX2,HOXC5,HOXC4,HOXB5,HOXC6,VENTX,HOXD4,ALX3,MEOX1,MEOX2,VAX2,GBX2,LHX2,LHX3,LHX4,LHX5,LHX6,HOXA6,GSX2,LHX9,ALX1,GSX1,RHOXF2,EN1,EN2,NKX1-2,HOXB6,OTP,MSX1,RAX,POU3F2,HOXB8,DRGX,HOXD8,LHX1,LBX2,HOXB3,LBX1,EVX1,HOXD1,HOXB4,EVX2,PAX4,PAX7,SHOX2,PHOX2A,RHOXF2B,HOXD3,ESX1,ARX,GBX1,EMX2,BSX,EMX1,NKX1-1,LHX8,HOXA5,HOXA4,HOXA3,PRRX1,PDX1,PRRX2,POU2F1	hg19-tss-centered-10kb-10species	0.0147331	-0.404988
	6957	GSM1208802_batch2_chrom1_LoVo_TEAD2_PassedQC_peaks_hg19	TEAD2/Lovo	TEAD2	hg19-tss-centered-10kb-chip-encode-taipale-inhouse	0.0161793	-0.405137
	6958	transfac_pro-M00493	V$STAT5A_03	STAT6,STAT5A,STAT5B	hg19-tss-centered-10kb-10species	0.0147312	-0.405463
	6959	transfac_pro-M01058	V$GFI1B_01	GFI1B,GFI1	hg19-tss-centered-10kb-10species	0.0147312	-0.405463
	6960	yetfasco-1586	YOL108C		hg19-tss-centered-10kb-10species	0.0147312	-0.405463
	6961	yetfasco-1591	YDR123C		hg19-tss-centered-10kb-10species	0.0147312	-0.405463
	6962	taipale-TSAAGGTCAN-ESRRG-full	TSAAGGTCAN-ESRRG-full	ESRRG,ESRRA,ESRRB,RORA,NR5A2,NR5A1	hg19-tss-centered-10kb-10species	0.0147293	-0.405938
	6963	transfac_pro-M00947	V$CP2_02	TFCP2,TFCP2L1	hg19-tss-centered-10kb-10species	0.0147293	-0.405938
	6964	elemento-CATGACC	CATGACC		hg19-tss-centered-10kb-10species	0.0147275	-0.406412
	6965	taipale-NYAATTAN-LHX9-DBD	NYAATTAN-LHX9-DBD	HOXC8,NOBOX,ISL1,ISL2,HOXC5,HOXC4,HOXC6,HOXD4,LHX1,GBX1,LHX3,BSX,LHX5,LHX6,LMX1B,LHX8,LHX9,UNCX,EN1,EN2,HOXA4,MSX1,MSX2,RAX,DLX3,RAX2,HOXB8,LHX2,HOXD8,GBX2,LBX2,HOXB3,DRGX,HOXB6,HOXD1,HOXB4,HOXB5,OTP,PAX7,DLX5,PHOX2A,LHX4,PHOX2B,LMX1A,BARHL1,ARX,HOXD3,EMX2,EMX1,NKX1-1,HOXA6,HOXA5,NKX1-2,HOXA3,DLX2,PRRX1,PRRX2	hg19-tss-centered-10kb-10species	0.0147275	-0.406412
	6966	transfac_pro-M02370	I$VIS_01		hg19-tss-centered-10kb-10species	0.0147275	-0.406412
	6967	elemento-ACCTTCA	ACCTTCA		hg19-tss-centered-10kb-10species	0.0147256	-0.406887
	6968	encode-UW.Motif.0355	UW.Motif.0355		hg19-tss-centered-10kb-10species	0.0147256	-0.406887
	6969	hdpi-SCC-112	SCC-112	PDS5A	hg19-tss-centered-10kb-10species	0.0147256	-0.406887
	6970	jaspar-MA0093.1	USF1	MYCN,MAX,USF2,USF1,MXI1,MYC	hg19-tss-centered-10kb-10species	0.0147237	-0.407362
	6971	stark-CNNNGCGYRTGANYNAT	CNNNGCGYRTGANYNAT		hg19-tss-centered-10kb-10species	0.0147237	-0.407362
	6972	transfac_pro-M01672	F$ASH1_01		hg19-tss-centered-10kb-10species	0.0147219	-0.407836
	6973	homer-M01850	GAL80(MacIsaac)/Yeast	TBPL2,TBPL1,MYB,SRF,MEF2BNB-MEF2B,TBP,SNAPC4,JAZF1,MEF2C,MEF2B,MEF2A,MEF2D,MYBL1,MYBL2	hg19-tss-centered-10kb-10species	0.01472	-0.408311
	6974	stark-WHWWWWWWWWKK	WHWWWWWWWWKK(bab1)	ELF3	hg19-tss-centered-10kb-10species	0.01472	-0.408311
	6975	taipale-NNCACGTGCC-HEY2-DBD	NNCACGTGCC-HEY2-DBD	HEYL,ARNT,BHLHE40,HES4,HES1,HES2,HES7,HEY2,HES5,HEY1	hg19-tss-centered-10kb-10species	0.01472	-0.408311
	6976	yetfasco-1403	YHR178W		hg19-tss-centered-10kb-10species	0.0147181	-0.408786
	6977	wgEncodeSydhTfbsHelas3Tf3c110StdPk.narrowPeak.gz	TFIIIC-110/HeLa-S3/None	GTF3C2	hg19-tss-centered-10kb-chip-encode-taipale-inhouse	0.016142	-0.408997
	6978	flyfactorsurvey-dl_FlyReg_FBgn0000462	FBgn0000462	RELB,RELA,REL	hg19-tss-centered-10kb-10species	0.0147163	-0.40926
	6979	homer-M00609	dl/dmmpmm(Pollard)/fly	RELB,RELA,REL	hg19-tss-centered-10kb-10species	0.0147163	-0.40926
	6980	jaspar-CN0191.1	LM191	RFX8,RFX4,RFX6,RFX1,RFX2,RFX3	hg19-tss-centered-10kb-10species	0.0147163	-0.40926
	6981	wgEncodeHaibTfbsGm12878RxraPcr1xPkRep2.broadPeak.gz	RXRA/GM12878/None	RXRA	hg19-tss-centered-10kb-chip-encode-taipale-inhouse	0.0161364	-0.409576
	6982	elemento-CTAATGAG	CTAATGAG		hg19-tss-centered-10kb-10species	0.0147126	-0.41021
	6983	transfac_pro-M00937	P$TGA1A_Q2_01		hg19-tss-centered-10kb-10species	0.0147126	-0.41021
	6984	swissregulon-SOX17.p2	SOX17	SOX17	hg19-tss-centered-10kb-10species	0.0147107	-0.410684
	6985	tfdimers-MD00476	FOXO1_MAF	FOXA2,NFE2L3,NFE2L2,NFE2L1,FOXA1,FOXA3,MAFK,NFE2,MAF,BACH2,MAFB,BACH1,MAFF,MAFG	hg19-tss-centered-10kb-10species	0.0147107	-0.410684
	6986	yetfasco-1350	YOR028C		hg19-tss-centered-10kb-10species	0.0147107	-0.410684
	6987	homer-M00082	HEB?/mES-Nanog-ChIP-Seq/Homer	ZIC2,BCL11A,ZIC1	hg19-tss-centered-10kb-10species	0.0147088	-0.411159
	6988	transfac_pro-M01059	P$AGL1_01	SRF,MEF2BNB-MEF2B,MEF2C,MEF2B,MEF2A,MEF2D	hg19-tss-centered-10kb-10species	0.0147088	-0.411159
	6989	yetfasco-1987	YLR451W		hg19-tss-centered-10kb-10species	0.014707	-0.411634
	6990	encode-UW.Motif.0354	UW.Motif.0354	NFIC,NFIA,NFIX	hg19-tss-centered-10kb-10species	0.0147051	-0.412108
	6991	jaspar-MA0268.1	ADR1		hg19-tss-centered-10kb-10species	0.0147051	-0.412108
	6992	tiffin-TIFDMEM0000018	TIFDMEM0000018		hg19-tss-centered-10kb-10species	0.0147051	-0.412108
	6993	yetfasco-2225	YOR380W		hg19-tss-centered-10kb-10species	0.0147051	-0.412108
	6994	yetfasco-576	YDR216W		hg19-tss-centered-10kb-10species	0.0147051	-0.412108
	6995	jaspar-MA0161.1	NFIC	NFIC,NFIB,NFIA,NFIX	hg19-tss-centered-10kb-10species	0.0147032	-0.412583
	6996	yetfasco-1404	YHR178W		hg19-tss-centered-10kb-10species	0.0147032	-0.412583
	6997	yetfasco-2026	YHR084W		hg19-tss-centered-10kb-10species	0.0147032	-0.412583
	6998	tfdimers-MD00464	IPF1_Oct-1		hg19-tss-centered-10kb-10species	0.0147014	-0.413058
	6999	yetfasco-68	YGL254W		hg19-tss-centered-10kb-10species	0.0147014	-0.413058
	7000	flyfactorsurvey-pdm3_SOLEXA_5_FBgn0033288	FBgn0033288	HOXC8,HOXC5,HOXC4,HOXB5,HOXC6,HOXD8,MEOX1,MEOX2,NKX1-1,LHX2,BSX,LHX6,HOXA6,LHX8,LHX9,HOXA5,NKX1-2,HOXB8,SRF,HOXD4,HOXB3,HOXB6,HOXD1,HOXB4,JAZF1,PAX7,SHOX2,HOXD3,TBPL2,TBPL1,MEF2BNB-MEF2B,TBP,EMX2,TCF7L1,EMX1,MEF2C,MEF2B,MEF2A,HOXA4,HOXA3,MEF2D,PDX1	hg19-tss-centered-10kb-10species	0.0146995	-0.413532
	7001	jaspar-CN0061.1	LM61		hg19-tss-centered-10kb-10species	0.0146976	-0.414007
	7002	stark-AAAATGCA	AAAATGCA		hg19-tss-centered-10kb-10species	0.0146976	-0.414007
	7003	taipale-GGGGTCAAAGGTCA-RXRA-DBD	GGGGTCAAAGGTCA-RXRA-DBD	NR2F6,HNF4A,HNF4G,PPARA,NR2F1,RXRA,NR2F2,NR2C2,PPARG,PPARD,NR2E3	hg19-tss-centered-10kb-10species	0.0146958	-0.414482
	7004	transfac_pro-M00939	V$E2F1_Q4_01	E2F7,E2F5,E2F4,E2F3,E2F2,E2F1,TFDP3,TFDP1	hg19-tss-centered-10kb-10species	0.0146958	-0.414482
	7005	transfac_pro-M02357	I$PRD_01	OVOL3,OVOL2,OVOL1	hg19-tss-centered-10kb-10species	0.0146958	-0.414482
	7006	encode-UW.Motif.0683	UW.Motif.0683		hg19-tss-centered-10kb-10species	0.0146939	-0.414956
	7007	taipale-NAAACGATNNAN-HOMEZ-DBD	NAAACGATNNAN-HOMEZ-DBD	HOMEZ	hg19-tss-centered-10kb-10species	0.0146939	-0.414956
	7008	tfdimers-MD00452	Crx_E2F1	CRX,OTX1,RAX,OTX2	hg19-tss-centered-10kb-10species	0.0146939	-0.414956
	7009	encode-UW.Motif.0558	UW.Motif.0558		hg19-tss-centered-10kb-10species	0.014692	-0.415431
	7010	yetfasco-1911	YOR229W		hg19-tss-centered-10kb-10species	0.014692	-0.415431
	7011	taipale-ACCGTTARRACCGTTA-MYBL2-DBD	ACCGTTARRACCGTTA-MYBL2-DBD		hg19-tss-centered-10kb-10species	0.0146902	-0.415906
	7012	tfdimers-MD00022	OG-2_OG-2		hg19-tss-centered-10kb-10species	0.0146902	-0.415906
	7013	transfac_pro-M00762	V$DR1_Q3	HNF4A,HNF4G,NR2F6,NR2F1,RXRA,NR2F2,NR2C2,PPARG,PPARD,NR2E3,PPARA	hg19-tss-centered-10kb-10species	0.0146902	-0.415906
	7014	jaspar-MA0021.1	Dof3		hg19-tss-centered-10kb-10species	0.0146883	-0.41638
	7015	tfdimers-MD00146	COE1_DRI1		hg19-tss-centered-10kb-10species	0.0146883	-0.41638
	7016	flyfactorsurvey-Slou_Cell_FBgn0002941	FBgn0002941(slou)	HOXC8,ISL1,ISL2,HOXC5,HOXC4,HOXC6,HOXA7,VENTX,EMX1,MEOX1,MEOX2,GBX2,LHX2,PHOX2B,BSX,LHX5,LHX6,LHX8,LHX9,UNCX,HOXD1,LBX2,HOXA4,HOXB3,DLX5,LMX1B,RAX,DLX3,RAX2,HOXB8,LBX1,HOXD8,LHX1,HOXD4,HOXB6,DRGX,EVX1,GBX1,HOXB4,EVX2,PRRX1,HOXB7,PHOX2A,HOXB5,NKX6-2,NKX6-3,NKX6-1,LMX1A,BARHL2,BARHL1,ARX,HOXD3,EMX2,TLX1,TLX2,TLX3,NKX1-1,HOXA6,HOXA5,NKX1-2,HOXA3,DLX2,OTP,PDX1,PRRX2	hg19-tss-centered-10kb-10species	0.0146864	-0.416855
	7017	flyfactorsurvey-ken_SANGER_10_FBgn0011236	FBgn0011236(ken)	BCL6B,BCL6	hg19-tss-centered-10kb-10species	0.0146864	-0.416855
	7018	transfac_pro-M01705	V$TCF4_01	TCF4,TCF7,TCF3,TCF7L1,TCF7L2,LEF1	hg19-tss-centered-10kb-10species	0.0146864	-0.416855
	7019	transfac_pro-M03849	V$SOX4_Q5	SOX4	hg19-tss-centered-10kb-10species	0.0146864	-0.416855
	7020	GSM1208731_batch2_chrom1_LoVo_E2F8_PassedQC_peaks_hg19	E2F8/Lovo	E2F8	hg19-tss-centered-10kb-chip-encode-taipale-inhouse	0.0160655	-0.416909
	7021	taipale-NNAACCGTTNN-MYBL2-DBD	NNAACCGTTNN-MYBL2-DBD	MYBL1,MYB	hg19-tss-centered-10kb-10species	0.0146827	-0.417804
	7022	taipale-RRGGTCATGACCYY-RXRA-full	RRGGTCATGACCYY-RXRA-full		hg19-tss-centered-10kb-10species	0.0146808	-0.418279
	7023	flyfactorsurvey-CG12361_SOLEXA_2_FBgn0250756	FBgn0250756	HOXC8,CDX1,ISL1,ISL2,CDX2,HOXC5,CDX4,HOXC6,VENTX,TLX3,MEOX1,MEOX2,LHX1,LHX2,LHX3,BSX,LHX5,LHX6,LHX8,LHX9,EVX2,NKX1-2,HOXB3,HOXC4,HOXB8,HOXD8,HOXD4,HOXB6,LMX1A,HOXD1,HOXB4,LMX1B,EVX1,POU4F1,HOXB7,POU4F3,NKX1-1,HOXB5,NKX6-2,NKX6-3,NKX6-1,POU4F2,HLX,HOXD3,EMX2,TLX1,TLX2,EMX1,HOXA7,HOXA6,HOXA5,HOXA4,HOXA3,OTP,PDX1,LHX4	hg19-tss-centered-10kb-10species	0.014679	-0.418754
	7024	hdpi-ZHX3	ZHX3	ZHX3	hg19-tss-centered-10kb-10species	0.014679	-0.418754
	7025	tiffin-TIFDMEM0000010	TIFDMEM0000010		hg19-tss-centered-10kb-10species	0.014679	-0.418754
	7026	transfac_pro-M00318	V$LPOLYA_B		hg19-tss-centered-10kb-10species	0.014679	-0.418754
	7027	transfac_pro-M03158	F$YAP1_02		hg19-tss-centered-10kb-10species	0.014679	-0.418754
	7028	transfac_pro-M01946	F$LYS14_02		hg19-tss-centered-10kb-10species	0.0146771	-0.419228
	7029	yetfasco-521	YDR034C		hg19-tss-centered-10kb-10species	0.0146771	-0.419228
	7030	wgEncodeHaibTfbsSknshraUsf1sc8983V0416102PkRep2.broadPeak.gz	USF1_(SC-8983)/SK-N-SH_RA/None	USF1	hg19-tss-centered-10kb-chip-encode-taipale-inhouse	0.0160412	-0.419418
	7031	transfac_pro-M01821	V$CMYB_Q5	MYB,MYBL2	hg19-tss-centered-10kb-10species	0.0146752	-0.419703
	7032	tfdimers-MD00359	STAT6_C/EBP	CEBPB,CEBPA,CEBPG,CEBPE,STAT6,CEBPD	hg19-tss-centered-10kb-10species	0.0146734	-0.420178
	7033	hdpi-ACO1	ACO1	ACO1	hg19-tss-centered-10kb-10species	0.0146715	-0.420652
	7034	yetfasco-563	YHR084W		hg19-tss-centered-10kb-10species	0.0146715	-0.420652
	7035	wgEncodeHaibTfbsGm12878NrsfPcr2xPkRep2.broadPeak.gz	NRSF/GM12878/None	REST	hg19-tss-centered-10kb-chip-encode-taipale-inhouse	0.0160244	-0.421155
	7036	wgEncodeSydhTfbsK562Irf1Ifna30StdPk.narrowPeak.gz	IRF1/K562/IFNa30	IRF1	hg19-tss-centered-10kb-chip-encode-taipale-inhouse	0.0160226	-0.421348
	7037	encode-UW.Motif.0579	UW.Motif.0579		hg19-tss-centered-10kb-10species	0.0146678	-0.421602
	7038	iDMMPMM-ANTP	Antp	HOXC8,HOXC5,HOXC4,HOXC6,VENTX,MEOX1,MEOX2,NKX1-1,HOXD1,HOXA4,HOXB3,LMX1B,HOXB8,HOXD8,HOXD4,HOXB6,EVX1,HOXB7,HOXB4,EVX2,HOXB5,NKX6-2,NKX6-3,NKX6-1,LMX1A,HOXD3,TLX1,TLX2,TLX3,HOXA7,HOXA6,HOXA5,NKX1-2,HOXA3	hg19-tss-centered-10kb-10species	0.0146678	-0.421602
	7039	transfac_pro-M02933	V$ZFP161_04	ZBTB14	hg19-tss-centered-10kb-10species	0.0146659	-0.422076
	7040	yetfasco-659	YDR520C		hg19-tss-centered-10kb-10species	0.0146659	-0.422076
	7041	swissregulon-NKX2-1-4.p2	NKX2-1,NKX2-4	NKX2-1	hg19-tss-centered-10kb-10species	0.014664	-0.422551
	7042	yetfasco-539	YER040W	GATA6,GATA4,GATA5,GATA2,GATA3,GATA1	hg19-tss-centered-10kb-10species	0.014664	-0.422551
	7043	yetfasco-2222	YFR034C	MYCN,ARNT,MAX,USF1,MXI1,MYC	hg19-tss-centered-10kb-10species	0.0146622	-0.423026
	7044	wgEncodeSydhTfbsHepg2Mazab85725IggrabPk.narrowPeak.gz	MAZ_(ab85725)/HepG2/None	MAZ	hg19-tss-centered-10kb-chip-encode-taipale-inhouse	0.0160039	-0.423278
	7045	taipale-NYAATTAN-PRRX2-full	NYAATTAN-PRRX2-full	NOBOX,ISL1,ISL2,GBX2,GBX1,BSX,LHX5,LHX9,MSX1,MSX2,RAX,RAX2,LHX2,LHX1,LBX2,HOXD1,PRRX1,PAX7,EMX2,EMX1,NKX1-1,NKX1-2,OTP,PRRX2	hg19-tss-centered-10kb-10species	0.0146603	-0.4235
	7046	taipale-WRWGTMAAYAN-FOXB1-DBD	WRWGTMAAYAN-FOXB1-DBD	FOXA1,FOXA2	hg19-tss-centered-10kb-10species	0.0146603	-0.4235
	7047	elemento-ATTGACA	ATTGACA		hg19-tss-centered-10kb-10species	0.0146584	-0.423975
	7048	homer-M00487	Lbe/dmmpmm(Noyes_hd)/fly	HOXC5,HOXC4,VENTX,EMX1,LHX1,LHX2,LHX5,LHX6,GSX2,LHX9,LBX2,RAX,RAX2,HOXD4,HOXB3,LBX1,EVX1,HOXB4,HOXD3,PAX4,SHOX2,EVX2,EMX2,TLX1,TLX2,TLX3,LHX8,HOXA4,HOXA3	hg19-tss-centered-10kb-10species	0.0146584	-0.423975
	7049	transfac_pro-M01479	V$POU6F1_03	POU6F1,LHX2,HOXB8,HOXD8,NOBOX,VAX1,HOXC8,GSX2,LHX9,ALX1,HOXD1,ALX3,PAX7,SHOX2,HOXA1,PRRX2,HOXA5,IRF6	hg19-tss-centered-10kb-10species	0.0146566	-0.42445
	7050	tfdimers-MD00394	Pax-4_Cdx-2	PAX4	hg19-tss-centered-10kb-10species	0.0146547	-0.424924
	7051	wgEncodeSydhTfbsK562Tf3c110StdPk.narrowPeak.gz	TFIIIC-110/K562/None	GTF3C2	hg19-tss-centered-10kb-chip-encode-taipale-inhouse	0.0159797	-0.425786
	7052	flyfactorsurvey-Ems_SOLEXA_FBgn0000576	FBgn0000576(ems)	HOXC8,NOBOX,VAX1,ISL1,ISL2,HOXC5,HOXC4,HOXB5,HOXC6,VENTX,NKX1-2,TLX3,ALX3,MEOX1,MEOX2,VAX2,LHX1,LHX2,LHX3,LHX4,LHX5,LHX6,LHX8,LHX9,ALX1,GSX1,UNCX,EN1,EN2,HOXA4,HOXB6,OTP,RHOXF2B,MSX1,LMX1B,GSX2,RAX,DLX3,NKX6-2,RAX2,HOXB8,DRGX,HOXD8,GBX2,HOXD4,HOXB3,LBX1,EVX1,HOXD1,HOXB4,EVX2,ESX1,PAX7,PAX6,DLX5,BSX,HOXD3,LBX2,NKX6-3,NKX6-1,DBX2,PRRX2,LMX1A,RHOXF2,ARX,EMX2,TLX1,TLX2,EMX1,NKX1-1,HOXA6,HOXA5,SHOX2,H…	hg19-tss-centered-10kb-10species	0.014651	-0.425874
	7053	homer-M00171	SCL/HPC7-Scl-ChIP-Seq/Homer	TAL1,TCF12	hg19-tss-centered-10kb-10species	0.014651	-0.425874
	7054	tiffin-TIFDMEM0000058	TIFDMEM0000058		hg19-tss-centered-10kb-10species	0.014651	-0.425874
	7055	yetfasco-1782	YPL075W		hg19-tss-centered-10kb-10species	0.014651	-0.425874
	7056	homer-M00253	EGL-5(Homeobox)/cElegans-L3-EGL5-ChIP-Seq(modEncode)/Homer		hg19-tss-centered-10kb-10species	0.0146491	-0.426348
	7057	jaspar-PF0135.1	AGCYRWTTC		hg19-tss-centered-10kb-10species	0.0146491	-0.426348
	7058	transfac_pro-M01388	V$DLX5_01	HMX1,HOXC8,ISX,VAX2,VAX1,ALX3,HOXC5,HOXC4,HOXC6,HOXA7,RHOXF2,RHOXF2B,ALX4,MNX1,MEOX1,NOBOX,GBX2,LHX2,PHOX2B,LHX4,LHX5,LHX6,GSX2,ALX1,UNCX,PAX6,EN1,EN2,NKX1-2,VSX1,VSX2,DLX4,DLX5,MSX2,DLX1,RAX,DLX2,RAX2,HOXB8,HOXD8,LHX1,LBX2,HOXB6,EVX1,HOXD1,HOXB4,HOXD3,BARX2,PAX4,PAX7,BARX1,HOXB7,MSX1,PHOX2A,BSX,HOXB3,HOXB5,NKX6-3,NKX6-1,DBX2,PRRX2,IRF6,BARHL1,ESX1,ARX,GBX1,EMX2,EVX2,NKX1-1,HOXA6,HOXA5,SHOX2,HOXA…	hg19-tss-centered-10kb-10species	0.0146491	-0.426348
	7059	wgEncodeHaibTfbsH1hescBcl11aV0416102PkRep2.broadPeak.gz	BCL11A/H1-hESC/None	BCL11A	hg19-tss-centered-10kb-chip-encode-taipale-inhouse	0.0159741	-0.426365
	7060	factorbook-NR2C2	NR2C2	NR2F6,HNF4A,HNF4G,NR2E3,NR2F1,RXRA,NR2F2,NR2C2,PPARG,PPARD,PPARA	hg19-tss-centered-10kb-10species	0.0146472	-0.426823
	7061	selexconsensus-vnd	vnd	NKX3-2,NKX3-1,NKX2-2,NKX2-3,NKX2-1,NKX2-6,NKX2-4,NKX2-5	hg19-tss-centered-10kb-10species	0.0146472	-0.426823
	7062	stark-TAATTRANNTTNATG	TAATTRANNTTNATG		hg19-tss-centered-10kb-10species	0.0146472	-0.426823
	7063	transfac_pro-M01634	F$YER184C_01		hg19-tss-centered-10kb-10species	0.0146472	-0.426823
	7064	yetfasco-1004	YKL032C		hg19-tss-centered-10kb-10species	0.0146472	-0.426823
	7065	yetfasco-1234	YKL062W	TGIF2LY,TGIF2LX,YOD1,TGIF1,TGIF2	hg19-tss-centered-10kb-10species	0.0146472	-0.426823
	7066	taipale-NRTTAATNATTAACN-HNF1B-full	NRTTAATNATTAACN-HNF1B-full	HNF1B,HNF1A,RHOXF1	hg19-tss-centered-10kb-10species	0.0146435	-0.427772
	7067	tfdimers-MD00589	E2F1_MAFA		hg19-tss-centered-10kb-10species	0.0146435	-0.427772
	7068	wgEncodeHaibTfbsPanc1NrsfV0416101PkRep1.broadPeak.gz	NRSF/PANC-1/None	REST	hg19-tss-centered-10kb-chip-encode-taipale-inhouse	0.0159591	-0.427909
	7069	taipale-GACCCCCYGYTGNGN-ZIC3-full	GACCCCCYGYTGNGN-ZIC3-full	GLIS2,GLIS3,GLIS1,ZIC4,ZIC5,ZIC2,ZIC3,ZIC1	hg19-tss-centered-10kb-10species	0.0146416	-0.428247
	7070	wgEncodeSydhTfbsHepg2Srebp1PravastStdPk.narrowPeak.gz	SREBP1/HepG2/pravastatin	SREBF1	hg19-tss-centered-10kb-chip-encode-taipale-inhouse	0.0159535	-0.428488
	7071	stark-RWWNTNRCACYT	RWWNTNRCACYT(byn)	TBX19,T	hg19-tss-centered-10kb-10species	0.0146398	-0.428722
	7072	transfac_pro-M00375	P$TGA1B_Q2	CREB3L2,USF2,USF1,ATF1,ATF3,CREB3L1	hg19-tss-centered-10kb-10species	0.0146398	-0.428722
	7073	stark-CAANNNAAA	CAANNNAAA		hg19-tss-centered-10kb-10species	0.014636	-0.429671
	7074	tiffin-TIFDMEM0000009	TIFDMEM0000009		hg19-tss-centered-10kb-10species	0.014636	-0.429671
	7075	transfac_pro-M02406	F$CUP2_01		hg19-tss-centered-10kb-10species	0.014636	-0.429671
	7076	wgEncodeSydhTfbsK562Setdb1MnasedUcdPk.narrowPeak.gz	SETDB1/K562/MNaseD	SETDB1	hg19-tss-centered-10kb-chip-encode-taipale-inhouse	0.0159386	-0.430032
	7077	hdpi-U2AF1	U2AF1	U2AF1	hg19-tss-centered-10kb-10species	0.0146342	-0.430146
	7078	elemento-CCTTGGC	CCTTGGC		hg19-tss-centered-10kb-10species	0.0146323	-0.43062
	7079	encode-UW.Motif.0027	UW.Motif.0027		hg19-tss-centered-10kb-10species	0.0146323	-0.43062
	7080	jaspar-PF0118.1	GGCNRNWCTTYS		hg19-tss-centered-10kb-10species	0.0146323	-0.43062
	7081	taipale-NKCACGTGMN-BHLHB3-full	NKCACGTGMN-BHLHB3-full	ARNTL,TFEB,BHLHE40,ARNT,USF2,MLXIPL,USF1,HES1,HES2,ARNTL2,HES4,HES5,ATF3,HES7	hg19-tss-centered-10kb-10species	0.0146323	-0.43062
	7082	hdpi-IRF6	IRF6	IRF6	hg19-tss-centered-10kb-10species	0.0146304	-0.431095
	7083	swissregulon-ZNF384.p2	ZNF384	ZNF384	hg19-tss-centered-10kb-10species	0.0146304	-0.431095
	7084	wgEncodeSydhTfbsHelas3Rad21IggrabPk.narrowPeak.gz	Rad21/HeLa-S3/None	RAD21	hg19-tss-centered-10kb-chip-encode-taipale-inhouse	0.0159255	-0.431383
	7085	transfac_pro-M01313	V$SIX1_01	SIX6,SIX1,SIX2,SIX3	hg19-tss-centered-10kb-10species	0.0146286	-0.43157
	7086	transfac_pro-M01431	V$BARX2_01	ISL2,LHX1,LHX2,LHX3,LHX4,LHX5,LHX6,LHX8,LHX9,RAX,HOXD8,EVX1,HOXD1,ESX1,SHOX2,NKX6-2,NKX6-3,NKX6-1,BARHL2,BARHL1,NKX1-1,NKX1-2,PRRX1,PRRX2,HOXC8,NOBOX,RAX2,HOXC5,HOXC4,HOXC6,MNX1,GSX2,EN1,EN2,VSX1,DLX4,DLX5,DLX1,HOXB8,LBX2,HOXB3,HOXB6,HOXB7,HOXB4,HOXB5,PAX4,PAX7,PAX6,RHOXF2B,LMX1B,IRF6,HLX,PDX1,ISX,VAX2,GBX2,GBX1,BSX,POU1F1,BARX2,BARX1,EMX2,HOXA7,HOXA6,HOXA5,HOXA4,HOXA3,HOXA1,RHOXF2,ALX3,ALX1,UNCX…	hg19-tss-centered-10kb-10species	0.0146286	-0.43157
	7087	transfac_pro-M03803	V$SOX17_Q2	SOX17	hg19-tss-centered-10kb-10species	0.0146286	-0.43157
	7088	yetfasco-1248	YHL027W		hg19-tss-centered-10kb-10species	0.0146286	-0.43157
	7089	encode-UW.Motif.0318	UW.Motif.0318		hg19-tss-centered-10kb-10species	0.0146267	-0.432044
	7090	GSM1208649_batch1_chrom1_LoVo_MEF2C_PassedQC_peaks_hg19	MEF2C/Lovo	MEF2C	hg19-tss-centered-10kb-chip-encode-taipale-inhouse	0.0159162	-0.432348
	7091	transfac_public-M00421	V$MEIS1BHOXA9_02	CDX1,CDX2,HOXA9,MEIS1,CDX4	hg19-tss-centered-10kb-10species	0.0146248	-0.432519
	7092	yetfasco-2173	YCR018C		hg19-tss-centered-10kb-10species	0.0146248	-0.432519
	7093	transfac_pro-M00329	V$PAX9_B	PAX5	hg19-tss-centered-10kb-10species	0.014623	-0.432994
	7094	transfac_pro-M01472	V$IRX5_01	IRX5,IRX4,IRX6,IRX3,IRX2	hg19-tss-centered-10kb-10species	0.014623	-0.432994
	7095	yetfasco-1654	YDR253C		hg19-tss-centered-10kb-10species	0.014623	-0.432994
	7096	wgEncodeHaibTfbsSknshPol24h8V0416101PkRep2.broadPeak.gz	Pol2-4H8/SK-N-SH/None	POLR2A	hg19-tss-centered-10kb-chip-encode-taipale-inhouse	0.0159087	-0.43312
	7097	flyfactorsurvey-Ind_Cell_FBgn0025776	FBgn0025776(ind)	VAX2,RAX2,ALX3,HOXC5,HOXC4,HOXB5,HOXC6,VENTX,MNX1,MEOX1,MEOX2,NOBOX,GBX2,LHX2,LHX3,LHX4,LHX5,LHX6,HOXA6,GSX2,LHX9,ALX1,GSX1,RHOXF2,ALX4,EN1,EN2,NKX1-2,VSX1,OTP,MSX1,RAX,HOXB6,POU3F2,DRGX,LHX1,HOXD4,HOXB3,LBX1,EVX1,HOXD1,HOXB4,EVX2,ESX1,PAX7,SHOX2,PHOX2A,RHOXF2B,PHOX2B,LBX2,PAX4,ARX,HOXD3,GBX1,EMX2,EMX1,HOXA7,LHX8,HOXA5,HOXA4,HOXA3,PRRX1,PDX1,PRRX2,POU2F1	hg19-tss-centered-10kb-10species	0.0146211	-0.433468
	7098	jaspar-MA0082.1	squamosa	SRF	hg19-tss-centered-10kb-10species	0.0146211	-0.433468
	7099	wgEncodeHaibTfbsGm12878NrsfPcr1xPkRep2.broadPeak.gz	NRSF/GM12878/None	REST	hg19-tss-centered-10kb-chip-encode-taipale-inhouse	0.0159031	-0.433699
	7100	taipale-NTAATCCN-OTX1-DBD	NTAATCCN-OTX1-DBD	DMBX1,CRX,OTX1,OTX2,GSC,GSC2	hg19-tss-centered-10kb-10species	0.0146174	-0.434418
	7101	elemento-CACGAGG	CACGAGG		hg19-tss-centered-10kb-10species	0.0146155	-0.434893
	7102	transfac_pro-M01037	V$GLI_Q2	GLI2,GLI3,GLIS1,GLI1	hg19-tss-centered-10kb-10species	0.0146155	-0.434893
	7103	transfac_pro-M01160	V$KID3_01	ZNF354C	hg19-tss-centered-10kb-10species	0.0146155	-0.434893
	7104	wgEncodeHaibTfbsH1hescNrsfV0416102PkRep2.broadPeak.gz	NRSF/H1-hESC/None	REST	hg19-tss-centered-10kb-chip-encode-taipale-inhouse	0.0158845	-0.435628
	7105	encode-UW.Motif.0182	UW.Motif.0182		hg19-tss-centered-10kb-10species	0.0146099	-0.436317
	7106	jaspar-CN0168.1	LM168		hg19-tss-centered-10kb-10species	0.0146099	-0.436317
	7107	yetfasco-1236	YOR372C	MYB,TGIF2LY,TGIF2LX,SNAPC4,MYBL1,MYBL2,TGIF2,TGIF1	hg19-tss-centered-10kb-10species	0.0146099	-0.436317
	7108	wgEncodeSydhTfbsK562Znf274m01UcdPk.narrowPeak.gz	ZNF274_(M01)/K562/None	ZNF274	hg19-tss-centered-10kb-chip-encode-taipale-inhouse	0.0158751	-0.436593
	7109	elemento-GATAAGC	GATAAGC		hg19-tss-centered-10kb-10species	0.0146062	-0.437266
	7110	flyfactorsurvey-CG31670_SANGER_5_FBgn0031375	FBgn0031375(erm)	FEZF1,FEZF2	hg19-tss-centered-10kb-10species	0.0146062	-0.437266
	7111	wgEncodeSydhTfbsGm12878Elk112771IggmusPk.narrowPeak.gz	ELK1_(1277-1)/GM12878/None	ELK1	hg19-tss-centered-10kb-chip-encode-taipale-inhouse	0.0158677	-0.437365
	7112	encode-UW.Motif.0058	UW.Motif.0058		hg19-tss-centered-10kb-10species	0.0146043	-0.437741
	7113	yetfasco-1390	YFR034C	MAX,MYC,ARNT,MYCN	hg19-tss-centered-10kb-10species	0.0146043	-0.437741
	7114	GSM1208633_batch1_chrom1_LoVo_HOXA10_PassedQC_peaks_hg19	HOXA10/Lovo	HOXA10	hg19-tss-centered-10kb-chip-encode-taipale-inhouse	0.0158602	-0.438137
	7115	flyfactorsurvey-gce_Clk_SANGER_5_FBgn0030627	FBgn0030627	MYCN,MAX,USF2,USF1,MXI1,MYC	hg19-tss-centered-10kb-10species	0.0146006	-0.43869
	7116	wgEncodeHaibTfbsPfsk1NrsfPcr2xPkRep1.broadPeak.gz	NRSF/PFSK-1/None	REST	hg19-tss-centered-10kb-chip-encode-taipale-inhouse	0.0158509	-0.439102
	7117	elemento-ATCTTATC	ATCTTATC	MECOM	hg19-tss-centered-10kb-10species	0.0145987	-0.439165
	7118	homer-M00312	br-Z3/dmmpmm(Bergman)/fly		hg19-tss-centered-10kb-10species	0.0145987	-0.439165
	7119	homer-M00466	CG9876/dmmpmm(Noyes_hd)/fly	VAX2,RAX2,HOXC5,RHOXF2,VENTX,HOXD4,NKX1-2,MNX1,NOBOX,GBX2,LHX2,LHX3,RHOXF2B,LHX5,LHX6,GSX2,LHX9,ALX1,GSX1,ALX4,EN1,EN2,HOXA4,VSX1,OTP,MSX1,LMX1B,RAX,HOXC4,POU3F2,LHX1,LBX2,HOXB3,DRGX,EVX1,HOXD1,HOXB4,HOXB7,BARX2,PAX4,PAX7,PAX6,NKX1-1,PHOX2A,LHX4,EVX2,NKX6-3,DBX2,LMX1A,ESX1,ARX,HOXD3,GBX1,EMX2,EMX1,HOXA7,ALX3,SHOX2,HOXA3,LHX8,PRRX1,PDX1,PRRX2,POU2F1	hg19-tss-centered-10kb-10species	0.0145987	-0.439165
	7120	homer-M00528	Dfd/dmmpmm(Noyes)/fly	HOXC8,HOXC5,HOXC4,HOXC6,VENTX,MEOX1,MEOX2,EVX2,HOXB8,HOXD8,HOXD4,HOXB3,HOXB6,HOXB7,HOXB4,HOXD3,EVX1,HOXB5,EMX2,EMX1,HOXA7,HOXA6,HOXA5,HOXA4,HOXA3,PDX1	hg19-tss-centered-10kb-10species	0.0145987	-0.439165
	7121	jaspar-MA0142.1	Pou5f1	POU3F1,NANOG,POU5F1B,POU5F1,SOX2,POU2F2,POU2F3,POU2F1	hg19-tss-centered-10kb-10species	0.0145987	-0.439165
	7122	taipale-NNYAATTANN-DLX1-DBD	NNYAATTANN-DLX1-DBD	NOBOX,VAX1,MEOX1,LHX1,LHX2,LHX5,LHX6,GSX2,LHX9,ALX1,UNCX,DLX5,DLX2,DLX3,RAX2,GBX2,LBX2,HOXB3,LBX1,GBX1,HOXD3,PAX7,IRF6,LHX8,HOXA5,HOXA3,RAX,PDX1,PRRX2,POU2F1	hg19-tss-centered-10kb-10species	0.0145987	-0.439165
	7123	yetfasco-1304	YHR124W		hg19-tss-centered-10kb-10species	0.0145987	-0.439165
	7124	yetfasco-1317	YDR207C		hg19-tss-centered-10kb-10species	0.0145987	-0.439165
	7125	yetfasco-1795	YBL008W	HIRA	hg19-tss-centered-10kb-10species	0.0145987	-0.439165
	7126	homer-M00462	CG34031/dmmpmm(Noyes_hd)/fly	NKX1-1,HOXC8,HOXB8,NKX1-2,HOXD8	hg19-tss-centered-10kb-10species	0.0145969	-0.439639
	7127	homer-M01745	UGA3(MacIsaac)/Yeast		hg19-tss-centered-10kb-10species	0.0145969	-0.439639
	7128	flyfactorsurvey-Ap_Cell_FBgn0000099	FBgn0000099(ap)	HOXC8,NOBOX,VAX1,RAX2,HOXC5,HOXC4,HOXC6,VENTX,ALX3,MEOX1,MEOX2,VAX2,GBX2,LHX2,LHX3,LHX4,LHX5,LHX6,HOXA6,GSX2,LHX9,ALX1,GSX1,UNCX,RHOXF2,ALX4,HOXD4,EN2,NKX1-2,VSX1,OTP,VSX2,RAX,HOXB6,POU3F2,HOXB8,DRGX,HOXD8,LHX1,LBX2,HOXB3,LBX1,EVX1,HOXD1,HOXB4,HOXB5,ESX1,PAX7,SHOX2,PHOX2A,RHOXF2B,HOXD3,IRF6,PAX4,ARX,GBX1,EMX2,EVX2,EMX1,NKX1-1,LHX8,HOXA5,HOXA4,HOXA3,HOXA2,HOXA1,PRRX1,PDX1,PRRX2,POU2F1	hg19-tss-centered-10kb-10species	0.014595	-0.440114
	7129	flyfactorsurvey-ovo_SANGER_5_FBgn0003028	FBgn0003028(ovo)	OVOL3,OVOL2,OVOL1	hg19-tss-centered-10kb-10species	0.014595	-0.440114
	7130	jaspar-PF0142.1	ACAWYAAAG		hg19-tss-centered-10kb-10species	0.014595	-0.440114
	7131	taipale-HNHNAGGTGTGANHH-TBX20-DBD	HNHNAGGTGTGANHH-TBX20-DBD	EOMES,TBX21,TBX6,TBX5	hg19-tss-centered-10kb-10species	0.014595	-0.440114
	7132	transfac_pro-M02250	V$MYC_01	MAX,MYC,MYCN	hg19-tss-centered-10kb-10species	0.014595	-0.440114
	7133	yetfasco-2057	YHR084W		hg19-tss-centered-10kb-10species	0.014595	-0.440114
	7134	yetfasco-2158	YOR380W		hg19-tss-centered-10kb-10species	0.014595	-0.440114
	7135	homer-M01555	XBP1/Literature(Harbison)/Yeast		hg19-tss-centered-10kb-10species	0.0145931	-0.440589
	7136	transfac_pro-M00690	V$AP3_Q6		hg19-tss-centered-10kb-10species	0.0145931	-0.440589
	7137	taipale-NSCTMATTAN-POU6F2-DBD	NSCTMATTAN-POU6F2-DBD	LHX2,LHX9,POU6F1,PDX1,MEOX1,MEOX2	hg19-tss-centered-10kb-10species	0.0145913	-0.441063
	7138	encode-UW.Motif.0508	UW.Motif.0508		hg19-tss-centered-10kb-10species	0.0145894	-0.441538
	7139	hdpi-VAX2	VAX2	VAX2,MRPL1	hg19-tss-centered-10kb-10species	0.0145894	-0.441538
	7140	taipale-ANCATATGNT-OLIG1-DBD	ANCATATGNT-OLIG1-DBD		hg19-tss-centered-10kb-10species	0.0145894	-0.441538
	7141	tfdimers-MD00246	Tst-1_Nanog	POU3F1,NANOG,SOX11,QSOX1,SMAD1,TCF7L1,POU5F1B,POU5F1,SOX2,SOX4	hg19-tss-centered-10kb-10species	0.0145894	-0.441538
	7142	transfac_pro-M00799	V$MYC_Q2	MAX,MYC,ARNT,MYCN,MXI1	hg19-tss-centered-10kb-10species	0.0145875	-0.442013
	7143	yetfasco-823	YER169W	KDM4C,KDM4B,KDM4A,KDM4E,KDM4D	hg19-tss-centered-10kb-10species	0.0145875	-0.442013
	7144	elemento-ATAATTGC	ATAATTGC		hg19-tss-centered-10kb-10species	0.0145857	-0.442487
	7145	tiffin-TIFDMEM0000022	TIFDMEM0000022		hg19-tss-centered-10kb-10species	0.0145857	-0.442487
	7146	wgEncodeHaibTfbsH1hescAtf3V0416102PkRep1.broadPeak.gz	ATF3/H1-hESC/None	ATF3	hg19-tss-centered-10kb-chip-encode-taipale-inhouse	0.0158173	-0.442576
	7147	transfac_pro-M00934	I$ZESTE_Q2_01		hg19-tss-centered-10kb-10species	0.0145819	-0.443437
	7148	elemento-CAGGTGGA	CAGGTGGA		hg19-tss-centered-10kb-10species	0.0145801	-0.443911
	7149	jaspar-PF0068.1	RGAANNTTC	HSF1,HSF2,HSF4	hg19-tss-centered-10kb-10species	0.0145801	-0.443911
	7150	taipale-NCTAATTANN-LHX2-DBD	NCTAATTANN-LHX2-DBD	HOXC8,ISX,VAX2,VAX1,RAX2,ALX3,HOXC5,RHOXF2,HOXC6,VENTX,HOXD4,MNX1,NOBOX,GBX2,LHX2,LHX3,LHX4,LHX5,LHX6,HOXA6,GSX2,LHX9,ALX1,GSX1,UNCX,ALX4,EN1,EN2,HOXA4,VSX1,OTP,VSX2,MSX1,LMX1B,RAX,HOXB6,HOXC4,POU3F2,HOXB8,DRGX,HOXD8,LHX1,LBX2,HOXB3,LBX1,EVX1,HOXD1,HOXB4,HOXB5,BARX2,ESX1,PAX7,SHOX2,DLX5,PHOX2A,RHOXF2B,HOXD3,LMX1A,IRF6,PAX4,ARX,GBX1,EMX2,EVX2,EMX1,NKX1-1,LHX8,HOXA5,NKX1-2,HOXA3,HOXA2,HOXA1,PRRX1,P…	hg19-tss-centered-10kb-10species	0.0145801	-0.443911
	7151	yetfasco-1674	YGL013C		hg19-tss-centered-10kb-10species	0.0145801	-0.443911
	7152	yetfasco-1707	YBL103C		hg19-tss-centered-10kb-10species	0.0145801	-0.443911
	7153	wgEncodeHaibTfbsH1hescSrfPcr1xPkRep2.broadPeak.gz	SRF/H1-hESC/None	SRF	hg19-tss-centered-10kb-chip-encode-taipale-inhouse	0.0158024	-0.44412
	7154	wgEncodeHaibTfbsGm12891Pu1Pcr1xPkRep2.broadPeak.gz	PU.1/GM12891/None	SPI1	hg19-tss-centered-10kb-chip-encode-taipale-inhouse	0.0158005	-0.444313
	7155	tfdimers-MD00437	YY1_WT1	WT1	hg19-tss-centered-10kb-10species	0.0145782	-0.444386
	7156	taipale-NGTCGTAAAAN-HOXD12-DBD	NGTCGTAAAAN-HOXD12-DBD	HOXD12,HOXA11,HOXD11,HOXC11,HOXC10,HOXC12	hg19-tss-centered-10kb-10species	0.0145763	-0.444861
	7157	tfdimers-MD00347	IPF1_IRF-8	PDX1	hg19-tss-centered-10kb-10species	0.0145745	-0.445335
	7158	transfac_pro-M00432	V$TITF1_Q3	NKX2-1	hg19-tss-centered-10kb-10species	0.0145707	-0.446285
	7159	wgEncodeHaibTfbsPfsk1Pol24h8V0416101PkRep2.broadPeak.gz	Pol2-4H8/PFSK-1/None	POLR2A	hg19-tss-centered-10kb-chip-encode-taipale-inhouse	0.01578	-0.446435
	7160	wgEncodeHaibTfbsGm12891Pax5c20V0416101PkRep1.broadPeak.gz	PAX5-C20/GM12891/None	PAX5	hg19-tss-centered-10kb-chip-encode-taipale-inhouse	0.0157725	-0.447207
	7161	flyfactorsurvey-lola-PW_SANGER_5_FBgn0005630	FBgn0005630(lola)		hg19-tss-centered-10kb-10species	0.014567	-0.447234
	7162	homer-M01766	HAP1(MacIsaac)/Yeast		hg19-tss-centered-10kb-10species	0.014567	-0.447234
	7163	transfac_pro-M02326	I$AL_01	VAX1,RAX2,HOXC5,HOXC4,RHOXF2,LHX1,LHX3,LHX4,LHX5,LHX6,LHX8,LHX9,ALX1,UNCX,ALX4,VSX1,PROP1,RAX,POU3F2,LBX2,DRGX,LMX1A,HOXB4,LMX1B,ESX1,SHOX2,PAX6,PHOX2A,RHOXF2B,PHOX2B,NKX6-3,NKX6-1,DBX2,ARX,HOXA7,HOXA4,OTP,POU2F1	hg19-tss-centered-10kb-10species	0.014567	-0.447234
	7164	wgEncodeSydhTfbsK562Znfmizdcp1ab65767IggrabPk.narrowPeak.gz	ZNF-MIZD-CP1_(ab65767)/K562/None	ZMIZ1	hg19-tss-centered-10kb-chip-encode-taipale-inhouse	0.0157706	-0.4474
	7165	tiffin-TIFDMEM0000110	TIFDMEM0000110		hg19-tss-centered-10kb-10species	0.0145651	-0.447709
	7166	transfac_pro-M01412	V$MSX1_02	ISL2,LHX1,LHX2,LHX3,LHX4,LHX5,LHX6,LHX8,LHX9,RAX,HOXD8,EVX1,HOXD1,HOXD3,ESX1,SHOX2,NKX6-2,NKX6-3,NKX6-1,BARHL2,BARHL1,NKX1-1,NKX1-2,PRRX1,PRRX2,HOXC8,NOBOX,POU3F2,HOXC5,HOXC4,HOXC6,MNX1,GSX2,GSX1,EN1,EN2,VSX1,DLX5,DLX1,HOXB8,LBX2,HOXB3,LMX1A,HOXB7,HOXB4,LMX1B,PAX4,PAX7,PAX6,HOXB5,IRF6,HLX,PDX1,ISX,VAX2,VAX1,GBX2,GBX1,RHOXF2B,HOXB6,POU1F1,BARX2,BARX1,EMX2,EMX1,HOXA7,HOXA6,HOXA5,HOXA4,HOXA3,HOXA1,R…	hg19-tss-centered-10kb-10species	0.0145651	-0.447709
	7167	transfac_pro-M01717	F$MOT3_Q2		hg19-tss-centered-10kb-10species	0.0145651	-0.447709
	7168	flyfactorsurvey-Six4_Cell_FBgn0027364	FBgn0027364(Six4)	SIX4,SIX5	hg19-tss-centered-10kb-10species	0.0145633	-0.448183
	7169	encode-UW.Motif.0183	UW.Motif.0183		hg19-tss-centered-10kb-10species	0.0145595	-0.449133
	7170	taipale-NNYAATTANN-GBX2-full	NNYAATTANN-GBX2-full	HOXC8,NOBOX,VAX1,ISL1,ISL2,LHX1,GBX1,LHX5,GSX2,LHX9,UNCX,DLX5,MSX2,RAX,DLX3,RAX2,HOXB8,LHX2,HOXD8,GBX2,HOXB3,HOXD1,PAX7,MSX1,BARHL2,IRF6,BARHL1,NKX1-1,HOXA5,NKX1-2,HOXA3,DLX2,PRRX1,PRRX2	hg19-tss-centered-10kb-10species	0.0145595	-0.449133
	7171	transfac_pro-M00479	P$ALFIN1_Q2		hg19-tss-centered-10kb-10species	0.0145595	-0.449133
	7172	hdpi-EDN1	EDN1	EDN1	hg19-tss-centered-10kb-10species	0.0145577	-0.449607
	7173	homer-M00077	GFY-Staf/Promoters/Homer	ZNF143	hg19-tss-centered-10kb-10species	0.0145577	-0.449607
	7174	taipale-AGGTGTGA-TBX1-DBD	AGGTGTGA-TBX1-DBD	TBX21,TBX22,EOMES,TBX6,T,TBX5,TBX15	hg19-tss-centered-10kb-10species	0.0145577	-0.449607
	7175	transfac_pro-M01402	V$HOXA2_01	HOXC8,VAX2,VAX1,HOXC6,RAX,ALX3,MEOX1,LHX2,LHX3,LHX4,LHX6,GSX2,LHX9,ALX1,EN2,NKX1-2,HOXB6,VSX2,DLX5,DLX1,DLX2,DLX3,HOXB8,HOXD8,LBX2,HOXB3,EVX1,HOXD1,HOXB5,PAX4,PAX7,BARX1,BSX,HOXD3,IRF6,ESX1,EMX2,EVX2,HOXA6,HOXA5,SHOX2,HOXA3,HOXA2,HOXA1,PDX1,PRRX2,POU2F1	hg19-tss-centered-10kb-10species	0.0145577	-0.449607
	7176	yetfasco-1249	YPL089C	MEF2BNB-MEF2B,ZNF683,MEF2C,MEF2B,MEF2A,PRDM1,PRDM2,MEF2D	hg19-tss-centered-10kb-10species	0.0145577	-0.449607
	7177	GSM1208796_batch2_chrom1_LoVo_SP2_PassedQC_peaks_hg19	SP2/Lovo	SP2	hg19-tss-centered-10kb-chip-encode-taipale-inhouse	0.0157464	-0.449909
	7178	transfac_pro-M00657	V$PTF1BETA_Q6		hg19-tss-centered-10kb-10species	0.0145558	-0.450082
	7179	yetfasco-945	YIL036W		hg19-tss-centered-10kb-10species	0.0145558	-0.450082
	7180	flyfactorsurvey-CG12155_SANGER_5_FBgn0029957	FBgn0029957(CG12155)		hg19-tss-centered-10kb-10species	0.0145539	-0.450557
	7181	jaspar-CN0148.1	LM148		hg19-tss-centered-10kb-10species	0.0145539	-0.450557
	7182	yetfasco-1206	YER040W	GATA6,GATA4,GATA5,GATA2,GATA3,GATA1	hg19-tss-centered-10kb-10species	0.0145539	-0.450557
	7183	taipale-GTCGTWAAAN-Hoxc10-DBD	GTCGTWAAAN-Hoxc10-DBD	HOXD12,HOXA11,HOXD11,HOXC11,HOXC10,HOXC12	hg19-tss-centered-10kb-10species	0.0145502	-0.451506
	7184	transfac_pro-M02834	V$ZFP740_03	ZNF444,ZNF740,SP2,SP4,SMAD3,ZIC4,ZIC5,ZIC2,ZIC3,ZIC1,BCL6B,ZNF410,ZNF467,ZNF281	hg19-tss-centered-10kb-10species	0.0145502	-0.451506
	7185	transfac_public-M00009	I$TTK69_01		hg19-tss-centered-10kb-10species	0.0145502	-0.451506
	7186	transfac_pro-M01862	V$ATF2_Q5	JDP2,JUNB,JUN,JUND,CREB1,CREM,ATF5,ATF4,ATF7,ATF6,ATF1,ATF3,ATF2	hg19-tss-centered-10kb-10species	0.0145483	-0.451981
	7187	taipale-NTGAATWNCATTCAN-Sox1-DBD	NTGAATWNCATTCAN-Sox1-DBD		hg19-tss-centered-10kb-10species	0.0145427	-0.453405
	7188	transfac_pro-M01456	V$HMBOX1_01	NOBOX,HMBOX1,ALX1,HNF1B,PAX7,SHOX2	hg19-tss-centered-10kb-10species	0.0145427	-0.453405
	7189	flyfactorsurvey-Eip78C_SANGER_5_FBgn0004865	FBgn0004865(Eip78C)	NR2F6,ESR1,RORC,RXRG,NR2F1,RXRA,RORA,RORB,NR2C2,RXRB,NR2F2	hg19-tss-centered-10kb-10species	0.0145409	-0.453879
	7190	wgEncodeHaibTfbsGm12878Pax5n19Pcr1xPkRep2.broadPeak.gz	PAX5-N19/GM12878/None	PAX5	hg19-tss-centered-10kb-chip-encode-taipale-inhouse	0.0157035	-0.454348
	7191	tfdimers-MD00416	HNF1_HNF1	HNF1B,HNF1A,TLX2,DBX1	hg19-tss-centered-10kb-10species	0.014539	-0.454354
	7192	homer-M00107	Max(HLH)/K562-Max-ChIP-Seq/Homer	HAND2,MYF6,HAND1,NHLH1,MITF,MXD4,MYOG,MXD1,MYF5,MYCN,MYOD1,MXD3,BHLHE40,BHLHE41,TFEB,USF2,USF1,TFE3,MYC,TCF12,TCF4,TAL1,TCF3,TAL2,ASCL1,ARID5B,ARNT,MAX,MXI1,ATF3	hg19-tss-centered-10kb-10species	0.0145371	-0.454829
	7193	homer-M00154	PR(NR)/T47D-PR-ChIP-Seq(GSE31130)/Homer	NR3C1,AR,PGR	hg19-tss-centered-10kb-10species	0.0145371	-0.454829
	7194	homer-M00233	Initiator/Drosophila-Promoters/Homer		hg19-tss-centered-10kb-10species	0.0145371	-0.454829
	7195	tiffin-TIFDMEM0000116	TIFDMEM0000116		hg19-tss-centered-10kb-10species	0.0145371	-0.454829
	7196	transfac_pro-M00327	V$PAX3_B	PAX5,PAX7,PAX8,PAX3,PAX2	hg19-tss-centered-10kb-10species	0.0145371	-0.454829
	7197	transfac_pro-M01428	V$GSC_01	DMBX1,CRX,OTX1,OTX2,GSC,PITX2,PITX3,PITX1,GSC2	hg19-tss-centered-10kb-10species	0.0145371	-0.454829
	7198	transfac_pro-M02882	V$MTF1_06	MTF1	hg19-tss-centered-10kb-10species	0.0145371	-0.454829
	7199	flyfactorsurvey-Lbl_SOLEXA_FBgn0008651	FBgn0008651(lbl)	HOXC8,VAX1,HOXC5,HOXC4,HOXB5,HOXC6,VENTX,TLX3,MEOX1,MEOX2,LHX1,LHX2,LHX3,BSX,LHX5,LHX6,LHX8,LHX9,GSX1,UNCX,HOXD4,NKX1-2,HOXB6,LMX1B,GSX2,RAX,RAX2,HOXB8,HOXD8,LBX2,HOXB3,LBX1,EVX1,HOXD1,HOXB4,HOXD3,PAX7,SHOX2,LHX4,EVX2,NKX6-2,NKX6-3,NKX6-1,LMX1A,ARX,EMX2,TLX1,TLX2,EMX1,NKX1-1,HOXA6,HOXA5,HOXA4,HOXA3,OTP,PDX1,POU2F1	hg19-tss-centered-10kb-10species	0.0145353	-0.455303
	7200	tfdimers-MD00248	AML1a_HNF1	HNF1B,HNF1A	hg19-tss-centered-10kb-10species	0.0145353	-0.455303
	7201	transfac_pro-M00982	V$KROX_Q6	WT1,EGR2,EGR3,EGR1,SP4,EGR4	hg19-tss-centered-10kb-10species	0.0145353	-0.455303
	7202	transfac_pro-M01010	V$HMGIY_Q3	HMGA2,HMGA1	hg19-tss-centered-10kb-10species	0.0145353	-0.455303
	7203	elemento-CAGGAGC	CAGGAGC		hg19-tss-centered-10kb-10species	0.0145334	-0.455778
	7204	taipale-ATGMATAATTAATG-POU4F1-DBD	ATGMATAATTAATG-POU4F1-DBD	POU4F1,POU4F2,POU4F3	hg19-tss-centered-10kb-10species	0.0145297	-0.456727
	7205	yetfasco-1578	YDR207C		hg19-tss-centered-10kb-10species	0.0145297	-0.456727
	7206	jaspar-MA0327.1	MATA1		hg19-tss-centered-10kb-10species	0.0145259	-0.457677
	7207	yetfasco-1612	YIR023W		hg19-tss-centered-10kb-10species	0.0145259	-0.457677
	7208	tfdimers-MD00085	c-Myb_c-Myb	MYB	hg19-tss-centered-10kb-10species	0.0145241	-0.458151
	7209	tfdimers-MD00382	Oct-1_Kid3	POU2F1	hg19-tss-centered-10kb-10species	0.0145241	-0.458151
	7210	wgEncodeHaibTfbsGm12878SrfPcr2xPkRep1.broadPeak.gz	SRF/GM12878/None	SRF	hg19-tss-centered-10kb-chip-encode-taipale-inhouse	0.0156661	-0.458207
	7211	GSM1208631_batch1_chrom1_LoVo_HINFP_PassedQC_peaks_hg19	HINFP/Lovo	HINFP	hg19-tss-centered-10kb-chip-encode-taipale-inhouse	0.0156643	-0.4584
	7212	jaspar-CN0157.1	LM157		hg19-tss-centered-10kb-10species	0.0145222	-0.458626
	7213	yetfasco-1531	YPL075W		hg19-tss-centered-10kb-10species	0.0145222	-0.458626
	7214	hdpi-RPL6	RPL6	RPL6	hg19-tss-centered-10kb-10species	0.0145203	-0.459101
	7215	jaspar-CN0123.1	LM123		hg19-tss-centered-10kb-10species	0.0145203	-0.459101
	7216	taipale-GACCCCCCGCGNNG-GLIS2-DBD	GACCCCCCGCGNNG-GLIS2-DBD	GLIS2,GLIS3,GLIS1,ZIC4,ZIC5,ZIC2,ZIC3,ZIC1	hg19-tss-centered-10kb-10species	0.0145203	-0.459101
	7217	transfac_public-M00147	V$HSF2_01	HSF1,HSF2	hg19-tss-centered-10kb-10species	0.0145185	-0.459575
	7218	transfac_public-M00434	P$PIF3_01	MYF5,MYF6,CLOCK,HAND1,NHLH1,MITF,MXD4,MYOG,MXD1,ARNTL,MYCN,ARNTL2,MYOD1,MXD3,BHLHE40,BHLHE41,TFEB,NPAS2,USF2,USF1,TFE3,MYC,TCF12,TCF4,TAL1,TCF3,TAL2,ASCL1,ARID5B,HAND2,ARNT,MXI1,MAX,ATF3	hg19-tss-centered-10kb-10species	0.0145185	-0.459575
	7219	jaspar-MA0302.1	GAT4		hg19-tss-centered-10kb-10species	0.0145166	-0.46005
	7220	hdpi-GTPBP6	GTPBP6	GTPBP6	hg19-tss-centered-10kb-10species	0.0145129	-0.460999
	7221	wgEncodeSydhTfbsK562Brf1StdPk.narrowPeak.gz	BRF1/K562/None	BRF1	hg19-tss-centered-10kb-chip-encode-taipale-inhouse	0.0156326	-0.461681
	7222	hdpi-SOX13	SOX13	SOX13	hg19-tss-centered-10kb-10species	0.0145091	-0.461949
	7223	jaspar-PF0101.1	CTGCAGY		hg19-tss-centered-10kb-10species	0.0145091	-0.461949
	7224	stark-RAGTGAAAGT	RAGTGAAAGT	ZNF683,IRF1,PRDM1	hg19-tss-centered-10kb-10species	0.0145091	-0.461949
	7225	transfac_pro-M01583	P$GL1_01		hg19-tss-centered-10kb-10species	0.0145091	-0.461949
	7226	yetfasco-1617	YPL049C		hg19-tss-centered-10kb-10species	0.0145091	-0.461949
	7227	jaspar-MA0002.2	RUNX1	RUNX2,RUNX3,CBFB,RUNX1,RUNX1T1	hg19-tss-centered-10kb-10species	0.0145073	-0.462423
	7228	transfac_pro-M01892	P$RIN_Q2		hg19-tss-centered-10kb-10species	0.0145073	-0.462423
	7229	encode-UW.Motif.0629	UW.Motif.0629		hg19-tss-centered-10kb-10species	0.0145054	-0.462898
	7230	transfac_pro-M00372	P$O2_02		hg19-tss-centered-10kb-10species	0.0145054	-0.462898
	7231	yetfasco-932	YKL185W	SRF,MEF2BNB-MEF2B,MEF2C,MEF2B,MEF2A,MEF2D	hg19-tss-centered-10kb-10species	0.0145054	-0.462898
	7232	homer-M00294	MF0004.1_Nuclear_Receptor_class/Jaspar	NR2F1,NR2F2	hg19-tss-centered-10kb-10species	0.0145035	-0.463373
	7233	transfac_public-M00422	V$FOXJ2_01	FOXQ1,FOXJ1,FOXJ2,FOXJ3,FOXI2,FOXK1,FOXD3,FOXS1,FOXA1,RRN3,FOXA3,FOXA2,FOXF1,FOXF2,FOXL1,FOXI1,FOXH1,FOXC2,FOXC1	hg19-tss-centered-10kb-10species	0.0145017	-0.463847
	7234	tfdimers-MD00250	GATA_YY1	YY1,RORC,RORB,RORA,GATA6,GATA4,GATA5,GATA2,GATA3,GATA1	hg19-tss-centered-10kb-10species	0.0144998	-0.464322
	7235	transfac_public-M00164	I$HSF_03	HSF1,HSF2,HSF4	hg19-tss-centered-10kb-10species	0.0144998	-0.464322
	7236	yetfasco-2123	YPR104C	FOXN4,FOXH1,FOXN1,FOXN2,FOXN3	hg19-tss-centered-10kb-10species	0.0144998	-0.464322
	7237	yetfasco-1084	YPR065W		hg19-tss-centered-10kb-10species	0.0144979	-0.464797
	7238	flyfactorsurvey-Al_SOLEXA_FBgn0000061	FBgn0000061(al)	HOXC8,ISX,NOBOX,VAX1,RAX2,ALX3,PRRX1,HOXC5,HOXC4,HOXA7,VENTX,HOXD4,RHOXF2,VAX2,GBX2,LHX2,LHX3,LHX4,LHX5,LHX6,LMX1B,GSX2,LHX9,ALX1,GSX1,UNCX,ALX4,EN1,EN2,HOXA4,VSX1,VSX2,DLX5,MSX2,RAX,DLX3,POU3F2,HOXB8,DRGX,HOXD8,LHX1,LBX2,HOXB3,LBX1,EVX1,HOXD1,HOXB4,EVX2,ESX1,PAX7,SHOX2,PHOX2A,RHOXF2B,PHOX2B,POU1F1,LMX1A,BARHL1,PAX4,ARX,HOXD3,GBX1,EMX2,EMX1,NKX1-1,LHX8,NKX1-2,HOXA3,DLX2,OTP,PDX1,PRRX2,POU2F1	hg19-tss-centered-10kb-10species	0.0144961	-0.465271
	7239	homer-M00093	HRE(HSF)/HepG2-HSF1-ChIP-Seq/Homer	HSF1,HSF2,HSF4	hg19-tss-centered-10kb-10species	0.0144961	-0.465271
	7240	jaspar-MA0135.1	Lhx3	DBX2,HOXC5,LHX3,LHX5,ALX3,ALX1,UNCX,VSX1,MSX1,POU3F2,POU3F1,POU3F4,HOXB4,BARX2,ESX1,PAX6,PHOX2B,NKX6-3,NKX6-1,POU1F1,OTP,PRRX2,POU2F1	hg19-tss-centered-10kb-10species	0.0144961	-0.465271
	7241	transfac_pro-M01149	V$DMRT4_01	DMRT2,DMRTA1,DMRT3	hg19-tss-centered-10kb-10species	0.0144961	-0.465271
	7242	yetfasco-1955	YER111C		hg19-tss-centered-10kb-10species	0.0144961	-0.465271
	7243	encode-UW.Motif.0427	UW.Motif.0427		hg19-tss-centered-10kb-10species	0.0144942	-0.465746
	7244	homer-M00331	ftz/dmmpmm(Bergman)/fly	HOXC9,HOXC8,VAX1,HOXC5,HOXC4,HOXC6,VENTX,LHX2,BSX,LHX9,EVX2,HOXB3,DLX5,HOXB8,HOXD8,HOXD4,EVX1,HOXB6,HOXD1,HOXB4,HOXD3,HOXB5,EMX2,EMX1,HOXA6,HOXA5,HOXA4,HOXA3,PDX1	hg19-tss-centered-10kb-10species	0.0144942	-0.465746
	7245	yetfasco-637	YDR253C		hg19-tss-centered-10kb-10species	0.0144942	-0.465746
	7246	yetfasco-655	YJR094C		hg19-tss-centered-10kb-10species	0.0144905	-0.466695
	7247	wgEncodeHaibTfbsA549MaxV0422111PkRep1.broadPeak.gz	Max/A549/None	MAX	hg19-tss-centered-10kb-chip-encode-taipale-inhouse	0.015584	-0.466698
	7248	GSM1208767_batch2_chrom1_LoVo_LYL1_PassedQC_peaks_hg19	LYL1/Lovo	LYL1	hg19-tss-centered-10kb-chip-encode-taipale-inhouse	0.0155747	-0.467663
	7249	wgEncodeSydhTfbsK562Bach1sc14700IggrabPk.narrowPeak.gz	Bach1_(sc-14700)/K562/None	BACH1	hg19-tss-centered-10kb-chip-encode-taipale-inhouse	0.0155747	-0.467663
	7250	jaspar-PF0020.1	GTGACGY	ATF4,CREB1	hg19-tss-centered-10kb-10species	0.0144849	-0.468119
	7251	tfdimers-MD00522	c-Ets-1(p54)_Lyf-1	IKZF1	hg19-tss-centered-10kb-10species	0.014483	-0.468594
	7252	transfac_pro-M02827	V$ZFP105_03	ZNF35	hg19-tss-centered-10kb-10species	0.014483	-0.468594
	7253	yetfasco-356	YER068W	CNOT4	hg19-tss-centered-10kb-10species	0.014483	-0.468594
	7254	wgEncodeHaibTfbsHepg2Atf3V0416101PkRep2.broadPeak.gz	ATF3/HepG2/None	ATF3	hg19-tss-centered-10kb-chip-encode-taipale-inhouse	0.0155635	-0.468821
	7255	wgEncodeSydhTfbsGm12878Corestsc30189IggmusPk.narrowPeak.gz	COREST_(sc-30189)/GM12878/None	RCOR1	hg19-tss-centered-10kb-chip-encode-taipale-inhouse	0.0155616	-0.469014
	7256	transfac_pro-M01006	P$AGP1_01		hg19-tss-centered-10kb-10species	0.0144812	-0.469069
	7257	transfac_pro-M02502	F$SMP1_02	ARID3A,RHOXF2B,MEF2BNB-MEF2B,LHX6,LBX2,RHOXF2,MEF2C,MEF2B,MEF2A,SHOX2,MEF2D,DLX2	hg19-tss-centered-10kb-10species	0.0144774	-0.470018
	7258	flyfactorsurvey-CG34031_Cell_FBgn0054031	FBgn0054031(CG34031)	NKX1-1,NKX1-2	hg19-tss-centered-10kb-10species	0.0144756	-0.470493
	7259	transfac_pro-M01714	V$KLF15_Q2	KLF15	hg19-tss-centered-10kb-10species	0.0144756	-0.470493
	7260	wgEncodeSydhTfbsGm12878MafkIggmusPk.narrowPeak.gz	MafK_(ab50322)/GM12878/None	MAFK	hg19-tss-centered-10kb-chip-encode-taipale-inhouse	0.0155448	-0.470751
	7261	jaspar-MA0357.1	PHO4	MYCN,ARNT,MAX,HES2,HES1,MYC,HES4,HES5,HES7	hg19-tss-centered-10kb-10species	0.0144718	-0.471442
	7262	yetfasco-2109	YDR213W		hg19-tss-centered-10kb-10species	0.0144718	-0.471442
	7263	elemento-TGGACAC	TGGACAC		hg19-tss-centered-10kb-10species	0.01447	-0.471917
	7264	tfdimers-MD00332	PUR1_ZF5		hg19-tss-centered-10kb-10species	0.01447	-0.471917
	7265	homer-M00532	en/dmmpmm(Noyes)/fly	HOXC8,VAX2,VAX1,ISL1,ISL2,HOXC6,EMX1,NOBOX,LHX1,GBX1,LHX3,BSX,LHX5,LHX6,LHX8,LHX9,EN1,MSX1,RAX,RAX2,HOXB8,LHX2,HOXD8,GBX2,LBX2,LMX1A,DRGX,HOXB6,HOXD1,HOXB5,OTP,PAX7,PHOX2A,LHX4,LMX1B,BARHL1,EMX2,TLX1,TLX2,TLX3,NKX1-1,HOXA6,HOXA5,NKX1-2,PRRX1,PRRX2	hg19-tss-centered-10kb-10species	0.0144681	-0.472391
	7266	wgEncodeSydhTfbsHelas3Znf274UcdPk.narrowPeak.gz	ZNF274/HeLa-S3/None	ZNF274	hg19-tss-centered-10kb-chip-encode-taipale-inhouse	0.015528	-0.472488
	7267	wolfe-br-PLPA_SOLEXA_10	br(FBgn0000210)	SRF,JAZF1	hg19-tss-centered-10kb-10species	0.0144644	-0.473341
	7268	yetfasco-1266	YER111C	MYB,MEF2BNB-MEF2B,SNAPC4,MEF2C,MEF2B,MEF2A,MEF2D,MYBL1,MYBL2	hg19-tss-centered-10kb-10species	0.0144625	-0.473815
	7269	yetfasco-794	YDL106C	HOXC8,MEF2C,NOBOX,VAX1,HOXB8,ISL2,HOXC5,HOXC4,HOXC6,RHOXF2,MNX1,VAX2,LHX1,LHX2,LHX3,RHOXF2B,LHX5,LHX6,ALX3,LHX9,ALX1,UNCX,ALX4,EN1,EN2,NKX1-2,VSX1,PROP1,DLX4,MSX1,SHOX2,DLX1,RAX,POU3F2,POU3F1,DBX2,HOXD8,POU3F4,LBX2,EVX1,LMX1A,HOXD1,HOXB4,LMX1B,BARX2,ESX1,PAX7,PAX6,HOXB7,PHOX2A,LHX4,PHOX2B,NKX6-3,LHX8,NKX6-1,POU1F1,DBX1,MEF2BNB-MEF2B,PAX4,ARX,EMX2,TLX2,EMX1,HOXA7,MEF2B,MEF2A,HOXA4,HOXA3,ARID3A,MEF…	hg19-tss-centered-10kb-10species	0.0144625	-0.473815
	7270	taipale-WTRMATATKYAW-POU3F3-DBD	WTRMATATKYAW-POU3F3-DBD		hg19-tss-centered-10kb-10species	0.0144606	-0.47429
	7271	flyfactorsurvey-CG13424_Cell_FBgn0034520	FBgn0034520(lms)	HMX1,HOXC8,HMX3,HMX2,NOBOX,ISL1,ISL2,HOXC5,HOXC4,HOXC6,VENTX,EMX1,GBX2,GBX1,LHX3,BSX,LHX5,LHX6,LMX1B,LHX8,LHX9,EVX2,UNCX,HOXD4,HOXA4,HOXB3,DLX5,MSX2,RAX,DLX3,RAX2,HOXB8,HOXD8,LHX1,LBX2,EVX1,DRGX,HOXB6,LHX2,HOXB4,HOXB5,OTP,PAX7,MSX1,PHOX2A,LHX4,PHOX2B,LMX1A,BARHL2,BARHL1,ARX,HOXD3,EMX2,TLX1,TLX2,TLX3,NKX1-1,HOXA6,HOXA5,NKX1-2,HOXA3,DLX2,PRRX1,PRRX2	hg19-tss-centered-10kb-10species	0.0144588	-0.474765
	7272	swissregulon-ARNT_ARNT2_BHLHB2_MAX_MYC_USF1.p2	ARNT,MAX,MYC,USF1,BHLHB2,ARNT2	HELT,MYF5,MYF6,HAND1,HAND2,MITF,MXD4,MYOG,MXD1,MYCN,MYOD1,MXD3,BHLHE40,BHLHE41,TAL2,USF2,USF1,TFE3,MYC,TCF4,TAL1,TCF3,TFEB,ASCL1,MAX,ARID5B,ARNT,MXI1,CREB3L2,NHLH1,CREB3L1,TCF12,ATF3	hg19-tss-centered-10kb-10species	0.0144588	-0.474765
	7273	homer-M00460	CG32532/dmmpmm(Noyes_hd)/fly	HMX1,HOXC8,HMX3,HMX2,NOBOX,VAX1,PHOX2B,ISL1,ISL2,HOXC5,HOXC4,HOXC6,HOXA7,VENTX,HHEX,EVX2,HOXD4,RHOXF2B,EMX1,RHOXF2,VAX2,LHX1,LHX2,LHX3,LHX4,LHX5,LHX6,HOXA6,GSX2,LHX9,ALX1,ALX3,UNCX,ALX4,EN1,EN2,HOXA4,VSX1,OTP,VSX2,MSX1,LMX1B,RAX,HOXB6,RAX2,HOXB8,LBX1,HOXD8,GBX2,LBX2,HOXB3,DRGX,LMX1A,HOXD1,HOXB4,HOXD3,EVX1,PAX4,PAX7,SHOX2,HOXB7,DLX5,PHOX2A,BSX,HOXB5,DLX3,IRF6,BARHL2,BARHL1,ESX1,ARX,GBX1,EMX2,TLX1,…	hg19-tss-centered-10kb-10species	0.0144569	-0.475239
	7274	elemento-CAAGTGCA	CAAGTGCA		hg19-tss-centered-10kb-10species	0.014455	-0.475714
	7275	jaspar-PF0047.1	TGCCAAR		hg19-tss-centered-10kb-10species	0.014455	-0.475714
	7276	taipale-YTAATTAN-VAX2-DBD	YTAATTAN-VAX2-DBD	HOXC8,NOBOX,HOXC5,HOXC4,HOXC6,VENTX,MEOX1,MEOX2,GBX2,LHX2,LHX3,LHX4,LHX5,LHX6,HOXA6,GSX2,LHX9,EVX2,GSX1,NKX1-2,HOXB6,DLX5,DLX1,RAX,RAX2,HOXB8,HOXD8,LHX1,HOXD4,HOXB3,EVX1,HOXD1,HOXB4,HOXD3,BARX2,PRRX1,HOXB5,PRRX2,IRF6,ARX,EMX2,EMX1,NKX1-1,LHX8,HOXA5,HOXA4,HOXA3,HOXA2,HOXA1,OTP,PDX1,GBX1	hg19-tss-centered-10kb-10species	0.014455	-0.475714
	7277	yetfasco-387	YDR423C		hg19-tss-centered-10kb-10species	0.014455	-0.475714
	7278	jaspar-PF0030.1	YGCGYRCGC		hg19-tss-centered-10kb-10species	0.0144494	-0.477138
	7279	yetfasco-1215	YOR038C	MEF2BNB-MEF2B,ZNF683,TGIF2LY,MEF2C,MEF2B,MEF2A,TGIF2LX,PRDM1,PRDM2,MEF2D,TGIF2,TGIF1	hg19-tss-centered-10kb-10species	0.0144494	-0.477138
	7280	wgEncodeHaibTfbsH1hescNrsfV0416102PkRep1.broadPeak.gz	NRSF/H1-hESC/None	REST	hg19-tss-centered-10kb-chip-encode-taipale-inhouse	0.0154795	-0.477505
	7281	flyfactorsurvey-lola_SANGER_5_FBgn0005630	FBgn0005630(lola)		hg19-tss-centered-10kb-10species	0.0144476	-0.477613
	7282	hdpi-RBM35A	RBM35A	ESRP1	hg19-tss-centered-10kb-10species	0.0144476	-0.477613
	7283	taipale-GGGGTCAAAGGTCA-RXRA-full	GGGGTCAAAGGTCA-RXRA-full	NR2F6,HNF4A,HNF4G,PPARA,NR2F1,RXRA,NR2F2,NR2C2,PPARG,PPARD,NR2E3	hg19-tss-centered-10kb-10species	0.0144476	-0.477613
	7284	tfdimers-MD00506	PUR1_GATA-1	GSC,GSC2	hg19-tss-centered-10kb-10species	0.0144476	-0.477613
	7285	yetfasco-1745	YDR216W		hg19-tss-centered-10kb-10species	0.0144476	-0.477613
	7286	GSM1208703_batch1_chrom1_LoVo_ZNF236_PassedQC_peaks_hg19	ZNF236/Lovo	ZNF236	hg19-tss-centered-10kb-chip-encode-taipale-inhouse	0.0154702	-0.47847
	7287	yetfasco-1895	YPR009W		hg19-tss-centered-10kb-10species	0.0144438	-0.478562
	7288	hdpi-TFAP2C	TFAP2C	TFAP2C	hg19-tss-centered-10kb-10species	0.014442	-0.479037
	7289	taipale-NSCCNNNGGSN-Tcfap2a-DBD	NSCCNNNGGSN-Tcfap2a-DBD	TFAP2A,TFAP2C,TFAP2B,TFAP2E	hg19-tss-centered-10kb-10species	0.014442	-0.479037
	7290	yetfasco-1701	YDL020C		hg19-tss-centered-10kb-10species	0.014442	-0.479037
	7291	wgEncodeSydhTfbsK562Ini1IggmusPk.narrowPeak.gz	Ini1/K562/None	SMARCB1	hg19-tss-centered-10kb-chip-encode-taipale-inhouse	0.0154627	-0.479242
	7292	homer-M00023	CRX(Homeobox)/Retina-Crx-ChIP-Seq/Homer	CRX,OTX1,OTX2,GSC,PITX2,PITX3,PITX1	hg19-tss-centered-10kb-10species	0.0144401	-0.479511
	7293	transfac_pro-M00436	V$IPF1_Q4	HOXD4,HOXC5,HOXD3,HOXB6,HOXC4,HOXB4,HOXC6,HOXA6,HOXA5,HOXA4,HOXA3,HOXB3,PDX1,HOXB5	hg19-tss-centered-10kb-10species	0.0144401	-0.479511
	7294	transfac_public-M00028	I$HSF_01	HSF1,HSF2,HSF4	hg19-tss-centered-10kb-10species	0.0144401	-0.479511
	7295	tfdimers-MD00418	MZF1_MTF1	ZNF444,MZF1,ZNF740,MAZ,ZNF219,ZNF467,ZNF281	hg19-tss-centered-10kb-10species	0.0144382	-0.479986
	7296	yetfasco-679	YDR310C		hg19-tss-centered-10kb-10species	0.0144364	-0.480461
	7297	factorbook-STAT2	STAT2	IRF3,IRF2,IRF1,STAT1,IRF7,STAT2,IRF5,IRF4,IRF9,IRF8,PRDM1,IRF6	hg19-tss-centered-10kb-10species	0.0144345	-0.480936
	7298	yetfasco-565	YIR013C		hg19-tss-centered-10kb-10species	0.0144345	-0.480936
	7299	yetfasco-781	YLR451W		hg19-tss-centered-10kb-10species	0.0144345	-0.480936
	7300	encode-UW.Motif.0263	UW.Motif.0263		hg19-tss-centered-10kb-10species	0.0144326	-0.48141
	7301	homer-M00689	pan/dmmpmm(SeSiMCMC)/fly	LEF1,TCF7,TCF7L2,TCF7L1	hg19-tss-centered-10kb-10species	0.0144326	-0.48141
	7302	transfac_pro-M01686	F$ARR1_01		hg19-tss-centered-10kb-10species	0.0144326	-0.48141
	7303	transfac_pro-M03183	P$AT5G52020_01		hg19-tss-centered-10kb-10species	0.0144326	-0.48141
	7304	wgEncodeHaibTfbsGm12878SrfV0416101PkRep1.broadPeak.gz	SRF/GM12878/None	SRF	hg19-tss-centered-10kb-chip-encode-taipale-inhouse	0.0154347	-0.482137
	7305	homer-M00391	pan/dmmpmm(Bigfoot)/fly	TCF7,LEF1,TCF7L2,TCF7L1	hg19-tss-centered-10kb-10species	0.0144289	-0.48236
	7306	stark-KVRKRNTCACTSRNTVHDB	KVRKRNTCACTSRNTVHDB(eyg)		hg19-tss-centered-10kb-10species	0.0144289	-0.48236
	7307	transfac_pro-M00399	P$ABF1_01	MAX,MYC,MNT	hg19-tss-centered-10kb-10species	0.014427	-0.482834
	7308	encode-UW.Motif.0362	UW.Motif.0362		hg19-tss-centered-10kb-10species	0.0144252	-0.483309
	7309	swissregulon-ELF1-2-4.p2	ELF2,ELF1,ELF4	ERF,ERG,ELF1,ELF2,ELF4,ETS2,ETS1,GABPB1,FLI1,EHF,ETV1,FEV,ETV3,ETV2,ETV5,ETV4,ETV7,ETV6,ELK3,ELK1,ELK4,GABPA	hg19-tss-centered-10kb-10species	0.0144233	-0.483784
	7310	wgEncodeSydhTfbsShsy5yGata2UcdPk.narrowPeak.gz	GATA-2/SH-SY5Y/None	GATA2	hg19-tss-centered-10kb-chip-encode-taipale-inhouse	0.0154179	-0.483874
	7311	encode-UW.Motif.0523	UW.Motif.0523		hg19-tss-centered-10kb-10species	0.0144214	-0.484258
	7312	homer-M00406	Antp/dmmpmm(Down)/fly	HOXA7,HOXC8,HOXB8,HOXD8,HOXB7	hg19-tss-centered-10kb-10species	0.0144214	-0.484258
	7313	homer-M01854	MET32(MacIsaac)/Yeast		hg19-tss-centered-10kb-10species	0.0144214	-0.484258
	7314	tiffin-TIFDMEM0000046	TIFDMEM0000046		hg19-tss-centered-10kb-10species	0.0144214	-0.484258
	7315	tiffin-TIFDMEM0000084	TIFDMEM0000084		hg19-tss-centered-10kb-10species	0.0144214	-0.484258
	7316	transfac_pro-M02809	V$SP100_03	SP140L,SP100	hg19-tss-centered-10kb-10species	0.0144214	-0.484258
	7317	elemento-AAGGTGA	AAGGTGA		hg19-tss-centered-10kb-10species	0.0144196	-0.484733
	7318	taipale-NAACCGGTTN-TFCP2-full	NAACCGGTTN-TFCP2-full	TFCP2L1	hg19-tss-centered-10kb-10species	0.0144196	-0.484733
	7319	transfac_pro-M01315	V$NKX52_01	HMX1,HMX3,HMX2,BARHL1,HOXB8,VSX1	hg19-tss-centered-10kb-10species	0.0144196	-0.484733
	7320	transfac_pro-M02807	V$SOX7_03	SOX18,SOX21,SOX30,SOX13,NANOG,SOX11,SOX12,QSOX1,SOX14,SOX15,SOX17,SOX8,SOX9,SOX2,SRY,SOX7,SOX4,SOX5	hg19-tss-centered-10kb-10species	0.0144196	-0.484733
	7321	yetfasco-1179	YLR131C	MYB,MEF2BNB-MEF2B,SNAPC4,MEF2C,MEF2B,MEF2A,MEF2D,MYBL1,MYBL2	hg19-tss-centered-10kb-10species	0.0144196	-0.484733
	7322	transfac_pro-M02780	V$MYBL1_03	MYBL1,MYB	hg19-tss-centered-10kb-10species	0.0144177	-0.485208
	7323	yetfasco-1546	YDR253C		hg19-tss-centered-10kb-10species	0.0144177	-0.485208
	7324	yetfasco-542	YLR013W		hg19-tss-centered-10kb-10species	0.0144177	-0.485208
	7325	taipale-WAWNTRGGTYAGTAGGTCA-RORA-DBD	WAWNTRGGTYAGTAGGTCA-RORA-DBD	NR1D1	hg19-tss-centered-10kb-10species	0.0144158	-0.485682
	7326	yetfasco-368	YER111C		hg19-tss-centered-10kb-10species	0.0144158	-0.485682
	7327	tfdimers-MD00284	ipf1_NMYC	GBX2,LHX2,LHX3,IRF6,LHX6,GSX2,LHX9,HOXD1,HOXB5,HOXA5,HOXA3,HOXA2,VSX2,PDX1,PRRX2,NOBOX	hg19-tss-centered-10kb-10species	0.014414	-0.486157
	7328	elemento-ACATGCG	ACATGCG		hg19-tss-centered-10kb-10species	0.0144121	-0.486632
	7329	flyfactorsurvey-odd_NBT_1.5_FBgn0002985	FBgn0002985(odd)		hg19-tss-centered-10kb-10species	0.0144121	-0.486632
	7330	wgEncodeHaibTfbsH1neuronsPol24h8V0422111PkRep2.broadPeak.gz	Pol2-4H8/H1-neurons/None	POLR2A	hg19-tss-centered-10kb-chip-encode-taipale-inhouse	0.0153862	-0.487154
	7331	yetfasco-1604	YDR423C		hg19-tss-centered-10kb-10species	0.0144084	-0.487581
	7332	elemento-TTAATTGC	TTAATTGC	HMX1	hg19-tss-centered-10kb-10species	0.0144065	-0.488056
	7333	encode-UW.Motif.0077	UW.Motif.0077		hg19-tss-centered-10kb-10species	0.0144065	-0.488056
	7334	wgEncodeHaibTfbsGm12878RxraPcr1xPkRep1.broadPeak.gz	RXRA/GM12878/None	RXRA	hg19-tss-centered-10kb-chip-encode-taipale-inhouse	0.0153769	-0.488119
	7335	yetfasco-862	YER130C	KDM4C,KDM4B,KDM4A,KDM4E,KDM4D	hg19-tss-centered-10kb-10species	0.0144046	-0.48853
	7336	transfac_pro-M01101	I$OVO_Q6	OVOL3,OVOL2,OVOL1	hg19-tss-centered-10kb-10species	0.0144028	-0.489005
	7337	transfac_public-M00445	V$XVENT1_01		hg19-tss-centered-10kb-10species	0.0144028	-0.489005
	7338	yetfasco-849	YLR228C		hg19-tss-centered-10kb-10species	0.0144028	-0.489005
	7339	encode-UW.Motif.0564	UW.Motif.0564		hg19-tss-centered-10kb-10species	0.0144009	-0.48948
	7340	transfac_pro-M01463	V$DOBOX5_01	DMBX1,OTX1,OTX2,GSC,PITX2,PITX1	hg19-tss-centered-10kb-10species	0.014399	-0.489954
	7341	homer-M00666	brk/dmmpmm(SeSiMCMC)/fly		hg19-tss-centered-10kb-10species	0.0143972	-0.490429
	7342	transfac_pro-M02263	V$NFE2L2_01	FOS,NFE2L2,NFE2L1,JUNB,JUN,JUND,FOSL1,NFE2,FOSL2,FOSB,BACH1,MAFG	hg19-tss-centered-10kb-10species	0.0143972	-0.490429
	7343	encode-UW.Motif.0584	UW.Motif.0584		hg19-tss-centered-10kb-10species	0.0143953	-0.490904
	7344	flyfactorsurvey-Btn_Cell_FBgn0014949	FBgn0014949(btn)	HOXC8,HOXC5,HOXC4,HOXC6,VENTX,EMX1,MEOX1,MEOX2,LHX2,LHX4,LHX9,EVX2,HOXB8,HOXD8,HOXD4,HOXB3,HOXB6,HOXB7,HOXB4,HOXB5,EVX1,BSX,HOXD3,NKX6-2,NKX6-3,NKX6-1,EMX2,TLX1,TLX2,TLX3,HOXA7,HOXA6,HOXA5,HOXA4,HOXA3,PDX1	hg19-tss-centered-10kb-10species	0.0143953	-0.490904
	7345	homer-M00480	Hbn/dmmpmm(Noyes_hd)/fly	HMX1,HOXA7,HMX3,HMX2,NOBOX,HOXC8,ISL2,HOXC5,HOXC4,OTP,HOXC6,RHOXF2,LHX1,GBX1,LHX3,LHX4,LHX5,LHX6,LHX8,LHX9,ALX1,UNCX,ALX4,EN1,EN2,NKX1-2,VSX1,PROP1,MSX1,RAX,RAX2,HOXB8,DBX2,HOXD8,GBX2,LBX2,HOXB6,DRGX,LMX1A,LHX2,HOXB4,LMX1B,ESX1,PAX7,PAX6,RHOXF2B,HOXB5,ARID3A,ARID3C,ARID3B,ARX,EMX2,EMX1,NKX1-1,HOXA6,HOXA5,SHOX2,PRRX1,PRRX2,POU2F1	hg19-tss-centered-10kb-10species	0.0143953	-0.490904
	7346	transfac_pro-M00927	V$AP4_Q6_01	TCF3,ASCL2,ATOH1,TFAP4	hg19-tss-centered-10kb-10species	0.0143953	-0.490904
	7347	transfac_pro-M03127	N$HLH26_01	HEYL,ARNT,BHLHE40,MXI1,CLOCK,NPAS2,USF1,MAX,MYC,HEY2,HEY1	hg19-tss-centered-10kb-10species	0.0143953	-0.490904
	7348	wgEncodeHaibTfbsGm12878NrsfPcr1xPkRep1.broadPeak.gz	NRSF/GM12878/None	REST	hg19-tss-centered-10kb-chip-encode-taipale-inhouse	0.0153433	-0.491593
	7349	transfac_pro-M01999	P$ERF1_Q2		hg19-tss-centered-10kb-10species	0.0143916	-0.491853
	7350	yetfasco-1932	YJL206C		hg19-tss-centered-10kb-10species	0.0143916	-0.491853
	7351	encode-UW.Motif.0307	UW.Motif.0307		hg19-tss-centered-10kb-10species	0.0143897	-0.492328
[truncated: 3,480 more rows]
